# Supplementary material for: Strategies of elite Chinese gymnasts in coping with landing impact from backward somersault
Source: PeerJ. 2019 Oct 25;7:e7914. doi: 10.7717/peerj.7914 (PMC6816378; doi:10.7717/peerj.7914)
Supplement: Supplemental Information 1 [file peerj-07-7914-s001.xlsx]

## Sheet: Kinematics
Gymnast A	Angle (degree)			Angular velocity (degree/s)				Gymnast B	Angle (degree)			Angular velocity (degree/s)				Gymnast C	Angle (degree)			Angular velocity (degree/s)				Gymnast D	Angle (degree)			Angular velocity (degree/s)				Gymnast E	Angle (degree)			Angular velocity (degree/s)				Gymnast F	Angle (degree)			Angular velocity (degree/s)
Time (ms)	hip	knee	ankle	hip	knee	ankle		Time (ms)	hip	knee	ankle	hip	knee	ankle		Time (ms)	hip	knee	ankle	hip	knee	ankle		Time (ms)	hip	knee	ankle	hip	knee	ankle		Time (ms)	hip	knee	ankle	hip	knee	ankle		Time (ms)	hip	knee	ankle	hip	knee	ankle
-100	111.446	172.151	97.6257	81.0552	138.225	-67.5592		-100	87.7066	146.57	106.072	300.483	410.172	-390.921		-100	85.7725	126.915	90.9633	432.715	715.521	29.8376		-100	88.4465	124.835	95.7131	453.558	776.771	82.3612		-100	104.49	172.238	123.122	287.169	102.126	128.937		-100	105.246	172.279	123.563	271.806	253.535	76.0336
-96	111.753	172.482	97.4863	51.3147	67.1573	-9.92807		-96	88.889	148.243	104.629	311.646	445.891	-321.626		-96	87.425	129.681	91.0355	425.471	708.706	36.273		-96	90.3155	128.02	95.9967	474.458	796.756	130.354		-96	105.561	171.919	123.638	262.541	23.737	101.171		-96	106.322	172.64	123.853	264.651	182.174	126.267
-92	111.948	172.528	97.661	14.9016	12.3189	32.1825		-92	90.1436	150.075	103.477	328.482	489.371	-250.629		-92	89.1765	132.585	91.2535	441.486	730.849	47.5078		-92	92.242	131.209	96.7559	467.543	782.318	89.3903		-92	106.577	171.431	123.931	245.945	-22.0305	111.847		-92	107.363	172.588	124.573	254.275	118.198	119.36
-88	111.959	172.399	98.0051	-23.6785	-18.8511	57.6985		-88	91.4983	152.105	102.622	346.815	538.933	-177.617		-88	90.957	135.528	91.4155	456.354	735.949	96.7903		-88	94.056	134.279	96.7119	466.901	785.7	172.853		-88	107.525	170.873	124.533	230.081	-39.0675	146.479		-88	108.356	172.171	124.808	238.499	61.4555	53.7643
-84	111.742	172.199	98.3197	-58.1446	-27.198	65.3539		-84	92.949	154.359	102.058	362.149	591.324	-102.056		-84	92.827	138.472	92.0278	462.601	728.485	141.13		-84	95.9775	137.495	98.1387	481.121	798.768	203.416		-84	108.42	170.315	125.103	213.75	-42.899	144.948		-84	109.271	171.517	125.003	222.484	17.6505	56.8099
-80	111.356	172.037	98.5518	-84.6953	-21.2951	55.7102		-80	94.4612	156.844	101.785	370.555	640.683	-24.2562		-80	94.658	141.356	92.5446	465.986	745.575	170.241		-80	97.905	140.669	98.3392	481.548	781.932	171.828		-80	109.256	169.803	125.692	200.69	-43.654	126.323		-80	110.136	170.871	125.263	220.486	-11.795	76.5443
-76	110.921	171.986	98.7517	-102.593	-11.1934	37.6359		-76	95.9876	159.543	101.828	369.004	678.626	55.4742		-76	96.555	144.437	93.3898	457.577	719.288	230.291		-76	99.83	143.75	99.5133	467.88	740.466	279.572		-76	110.039	169.382	126.114	192.942	-28.013	93.3528		-76	111.035	170.143	125.615	222.52	-31.5705	84.6367
-72	110.503	172.029	98.9022	-114.328	-4.45875	24.2866		-72	97.4858	162.405	102.21	356.128	695.199	136.644		-72	98.3185	147.11	94.3869	449.14	654.108	264.77		-72	101.648	146.594	100.576	459.56	689.278	230.878		-72	110.79	169.056	126.439	172.752	-0.441	110.353		-72	111.916	169.373	125.94	208.529	-35.0405	131.823
-68	110.07	172.076	98.94	-125.945	-5.61428	22.69		-68	98.9136	165.324	102.93	332.502	678.715	216.117		-68	100.148	149.669	95.5079	453.385	625.542	292.314		-68	103.506	149.264	101.36	461.864	642.784	242.62		-68	111.49	168.828	126.996	159.466	-4.9505	137.951		-68	112.703	168.796	126.67	211.885	-50.712	144.375
-64	109.565	172.055	98.9164	-143.464	-15.9111	33.9289		-64	100.22	168.141	103.976	299.609	618.904	287.022		-64	101.946	152.114	96.7254	450.048	579.88	323.862		-64	105.343	151.736	102.517	459.465	592.324	296.342		-64	112.119	168.695	127.543	164.29	11.356	129.521		-64	113.612	167.988	127.095	219.927	-53.781	153.928
-60	108.961	171.954	98.9991	-167.565	-33.102	58.4133		-60	101.364	170.652	105.318	259.089	517.936	340.8		-60	103.749	154.309	98.0988	442.448	503.079	356.411		-60	107.182	154.003	103.731	452.543	526.437	308.097		-60	112.779	168.634	128.033	176.036	4.2935	129.421		-60	114.463	167.418	127.901	203.12	-31.5785	196.826
-56	108.244	171.787	99.2957	-193.756	-52.4309	92.948		-56	102.323	172.607	106.88	213.151	391.968	369.915		-56	105.485	156.139	99.5767	444.923	438.057	390.342		-56	108.964	155.947	104.982	438.203	448.969	297.931		-56	113.529	168.597	128.578	184.079	-19.2865	127.654		-56	115.236	166.999	128.669	201.577	-17.7285	212.697
-52	107.403	171.548	99.7996	-217.217	-69.2067	127.658		-52	103.084	173.836	108.525	164.438	259.966	369.952		-52	107.308	157.813	101.222	449.916	376.887	419.204		-52	110.688	157.595	106.115	415.852	356.572	287.953		-52	114.275	168.604	129.054	179.705	23.101	122.866		-52	116.075	166.668	129.603	207.311	-7.644	217.635
-48	106.454	171.219	100.44	-235.287	-81.103	154.008		-48	103.643	174.447	110.086	114.965	139.691	340.734		-48	109.084	159.154	102.93	441.221	308.575	386.154		-48	112.29	158.799	107.285	383.957	251.999	220.476		-48	115.05	168.602	129.561	184.706	33.6635	122.746		-48	116.895	166.527	130.411	201.364	-2.1935	163.877
-44	105.446	170.83	101.137	-247.243	-87.7689	172.773		-44	103.998	174.655	111.427	65.8011	46.3643	286.298		-44	110.838	160.282	104.311	446.889	256.254	285.964		-44	113.759	159.611	107.878	365.922	159.967	153.39		-44	115.87	168.581	130.036	191.341	24.016	109.655		-44	117.686	166.511	130.914	197.906	11.6405	165.022
-40	104.425	170.442	101.838	-255.024	-89.3146	189.111		-40	104.158	174.611	112.474	17.9114	-16.9085	213.659		-40	112.66	161.204	105.218	429.188	166.077	202.362		-40	115.217	160.079	108.512	352.629	122.199	157.694		-40	116.698	168.541	130.438	199.334	24.418	102.61		-40	118.478	166.654	131.731	201.572	29.025	187.942
-36	103.407	170.089	102.571	-263.237	-87.2958	204.2		-36	104.13	174.404	113.189	-27.2332	-59.7752	131.148		-36	114.271	161.611	105.93	408.494	125.072	195.638		-36	116.581	160.589	109.14	336.349	87.8945	152.62		-36	117.624	168.442	130.857	214.304	14.553	93.4677		-36	119.299	166.916	132.417	201.764	46.6055	147.68
-32	102.375	169.767	103.416	-276.191	-86.767	213.176		-32	103.919	174.082	113.549	-68.2206	-93.3361	46.6334		-32	115.927	162.205	106.783	410.362	105.025	180.225		-32	117.909	160.782	109.733	330.533	24.182	170.731		-32	118.643	168.284	131.186	230.959	-10.822	86.6096		-32	120.093	167.362	132.912	204.885	50.558	105.017
-28	101.278	169.448	104.374	-294.455	-95.1368	207.021		-28	103.543	173.658	113.543	-104.2	-126.588	-34.4213		-28	117.554	162.451	107.371	414.246	57.679	159.791		-28	119.225	160.782	110.506	308.041	-37.383	188.73		-28	119.775	168.18	131.55	254.123	-9.9585	68.0838		-28	120.938	167.888	133.258	216.658	44.352	80.0447
-24	100.065	169.098	105.326	-314.321	-116.896	177.529		-24	103.035	173.117	113.201	-134.531	-167.696	-109.527		-24	119.242	162.666	108.061	407.035	8.6475	160.833		-24	120.373	160.483	111.243	301.715	-73.35	148.372		-24	120.971	168.233	131.731	276.49	19.5365	71.7108		-24	121.825	168.454	133.553	230.609	43.4885	70.7245
-20	98.7271	168.647	106.076	-330.541	-150.941	123.94		-20	102.425	172.419	112.586	-158.885	-222.34	-178.779		-20	120.81	162.52	108.658	390.931	-77.2	-46.3362		-20	121.638	160.195	111.693	307.806	-94.361	77.1761		-20	122.16	168.595	132.123	298.983	21.6625	89.3946		-20	122.782	169.048	133.823	247.312	36.4185	69.2854
-16	97.3173	167.995	106.465	-339.842	-195.238	53.0048		-16	101.732	171.482	111.737	-178.154	-292.965	-245.734		-16	122.369	162.048	107.691	405.514	-154.502	-1214.05		-16	122.835	159.728	111.86	300.361	-173.638	-641.074		-16	123.285	169.293	132.446	323.418	4.9235	-249.674		-16	123.803	169.628	134.107	268.149	20.4785	66.4268
-12	95.9146	167.106	106.469	-342.643	-250.537	-27.2539		-12	100.974	170.209	110.655	-194.274	-379.303	-316.416		-12	124.054	161.284	98.9457	395.422	-361.595	-1857.89		-12	124.041	158.806	106.564	349.059	-211.5	-1985.32		-12	124.297	170.193	130.126	334.081	-12.2095	-1151.11		-12	124.928	170.246	134.355	289.637	-26.027	-192.843
-8	94.5596	166.001	106.165	-342.858	-318.573	-110.7		-8	100.166	168.534	109.298	-209.04	-477.181	-393.697		-8	125.532	159.156	92.8277	356.966	-807.722	-917.792		-8	125.627	158.036	95.9779	351.293	-394.379	-1874.02		-8	125.169	171.037	123.237	325.953	-61.574	-2213.94		-8	126.12	170.993	132.564	295.395	-113.359	-1650.28
-4	93.2293	164.66	105.592	-347.054	-402.165	-192.964		-4	99.3079	166.421	107.594	-223.931	-578.686	-473.369		-4	126.91	154.822	91.6034	119.639	-1449.47	-1345.68		-4	126.851	155.651	91.572	257.98	-901.77	-1089.3		-4	125.962	171.356	112.414	277.269	-127.1	-3026.01		-4	127.291	171.26	121.153	261.995	-208.226	-3130.89
0	91.8712	162.977	104.696	-363.259	-507.859	-272.893		0	98.3909	163.869	105.499	-240.555	-675.601	-545.957		0	126.489	147.56	82.0622	-486.486	-2235.48	-1782.71		0	127.692	150.822	87.2635	34.124	-1534.31	-1645.47		0	126.465	170.702	99.029	210.615	-239.976	-2727.65		0	128.217	171.173	107.517	185.309	-314.875	-3281.28
4	90.4309	160.815	103.422	-398.695	-643.167	-352.322		4	97.4037	160.921	103.066	-260.45	-761.866	-600.308		4	123.018	136.939	77.3417	-1033.51	-2690.53	-904.203		4	127.124	143.376	78.4083	-437.955	-2209.98	-1984.03		4	126.638	168.893	90.5932	161.407	-459.216	-1287.72		4	128.774	170.571	94.9023	118.05	-516.527	-2646.62
8	88.8398	158.051	101.807	-456.612	-809.15	-431.604		8	96.3335	157.651	100.441	-284.74	-833.574	-626.339		8	118.221	126.035	74.8286	-1158.64	-2334.43	-347.258		8	124.188	133.142	71.3913	-821.05	-2413.61	-1010.4		8	126.482	166.1	88.7273	-18.689	-816.497	-212.369		8	129.161	168.627	86.344	83.339	-775.706	-1044.1
12	86.9801	154.551	99.9156	-533.828	-995.724	-507.458		12	95.1624	154.137	97.7945	-314.164	-888.714	-618.19		12	113.749	118.263	74.5636	-753.427	-1371.55	379.146		12	120.556	124.068	70.3251	-826.875	-1908.76	38.3787		12	126.062	162.631	88.8942	-434.714	-1253.86	-408.997		12	129.44	165.018	86.5495	-136.616	-1127.81	59.1393
16	84.7178	150.19	97.7524	-620.792	-1182.97	-575.814		16	93.8643	150.439	95.2697	-348.902	-926.852	-576.345		16	112.194	115.064	77.8618	-238.825	-564.026	571.259		16	117.573	117.873	71.6983	-589.555	-1238.59	435.433		16	124.752	158.746	85.4553	-907.036	-1567.04	-853.32		16	128.068	158.431	86.8171	-641.889	-1549.39	-678.04
20	81.9961	144.953	95.2958	-704.555	-1346.23	-632.012		20	92.4114	146.617	92.9908	-388.229	-948.754	-506.039		20	111.839	113.751	79.1337	-79.67	-312.768	70.9648		20	115.84	114.159	73.8086	-346.391	-760.702	241.967		20	121.923	154.623	82.0677	-1086.23	-1578.19	-330.767		20	124.305	149.74	81.1252	-1016.47	-1678.49	-1076.36
24	78.8916	139.01	92.5749	-771.767	-1461.14	-667.402		24	90.7823	142.736	91.0657	-430.365	-956.217	-413.97		24	111.556	112.561	78.4295	-110.236	-369.255	-157.018		24	114.802	111.786	73.634	-201.363	-510.987	-54.9569		24	118.846	150.422	82.8091	-895.246	-1269.77	541.57		24	119.936	142.216	78.2062	-958.235	-1489.93	-92.3748
28	75.5694	132.696	89.706	-810.542	-1508.72	-671.143		28	88.9694	138.869	89.5753	-472.308	-951.237	-306.279		28	110.957	110.797	77.8776	-109.332	-376.305	-102.129		28	114.228	110.071	73.3689	-153.502	-439.124	-113.215		28	116.058	146.293	86.4002	-594.374	-854.822	897.964		28	116.639	136.85	80.3862	-711.182	-1185.34	931.089
32	72.1768	126.373	86.8767	-813.586	-1481.25	-636.304		32	86.9799	135.065	88.5642	-510.174	-935.512	-188.134		32	110.681	109.551	77.6125	-12.68	-305.994	-41.4867		32	113.573	108.273	72.7283	-151.697	-457.152	-56.818		32	113.82	142.39	89.9929	-366.726	-532.648	697.821		32	114.248	133.326	85.6549	-503.927	-842.452	1154.81
36	68.8349	120.36	84.3022	-781.436	-1385.46	-562.911		36	84.8343	131.345	88.0462	-540.551	-911.399	-65.1333		36	110.855	108.349	77.5457	19.9315	-386.747	-101.255		36	113.016	106.414	72.9144	-116.126	-456.406	73.2203		36	111.883	138.844	91.9828	-255.948	-340.907	439.036		36	112.608	131.03	89.6247	-350.751	-563.319	835.261
40	65.6875	114.92	82.1502	-721.585	-1239.75	-458.375		40	82.5757	127.732	88.0324	-561.659	-882.117	55.1146		40	110.841	106.457	76.8024	-14.7835	-514.712	-300.745		40	112.644	104.623	73.3141	-85.147	-473.429	-11.3535		40	110.096	135.757	93.5051	-226.28	-232.406	290.375		40	111.441	129.516	92.337	-260.856	-352.611	547.869
44	62.8841	110.236	80.5174	-644.667	-1068.24	-337.567		44	80.2593	124.256	88.5292	-573.168	-849.816	163.642		44	110.737	104.231	75.1397	-35.4045	-583.919	-582.256		44	112.334	102.626	72.8236	-100.315	-550.639	-267.612		44	108.505	133.161	94.3058	-237.859	-168.532	161.28		44	110.52	128.625	94.0076	-221.317	-204.577	402.568
48	60.5004	106.378	79.447	-562.126	-894.819	-219.224		48	77.9305	120.929	89.4867	-575.681	-814.552	251.294		48	110.559	101.785	72.1444	-64.4635	-625.993	-676.912		48	111.842	100.217	71.1732	-128.156	-619.082	-447.478		48	107.006	131.113	94.7954	-281.525	-164.147	75.9831		48	109.671	128.076	95.5575	-228.239	-148.504	450.418
52	58.4951	103.273	78.9054	-484.687	-738.129	-119.003		52	75.6153	117.742	90.779	-570.325	-775.359	309.345		52	110.221	99.223	69.7244	-66.552	-620.159	-448.699		52	111.309	97.6735	69.2437	-135.297	-637.103	-396.98		52	105.648	129.643	94.9137	-352.452	-233.612	19.2847		52	108.695	127.483	97.6109	-254.118	-147.548	487.75
56	56.7683	100.749	78.7573	-420.005	-609.49	-46.0942		56	73.3316	114.696	92.2387	-557.799	-730.844	332.449		56	110.025	96.8245	68.5548	-37.833	-566.801	-174.886		56	110.76	95.1205	67.9973	-136.401	-634.928	-198.759		56	104.347	128.764	94.9497	-384.755	-295.164	-17.592		56	107.638	126.744	99.4595	-286.197	-171.478	423.451
60	55.2384	98.6346	78.8118	-370.765	-513.617	-4.2661		60	71.104	111.826	93.6981	-538.017	-679.291	322.516		60	109.918	94.689	68.3253	-32.0075	-536.24	0.0395775		60	110.218	92.594	67.6537	-119.657	-604.909	-27.4382		60	103.409	128.409	94.7729	-342.585	-284.982	-101.052		60	106.405	125.745	100.999	-313.164	-210.708	285.632
64	53.8659	96.8166	78.9196	-334.917	-449.52	7.6828		64	68.9665	109.184	95.0116	-511.169	-620.157	287.825		64	109.769	92.5345	68.5551	-19.976	-498.128	54.2097		64	109.803	90.281	67.7778	-98.5285	-552.188	46.4683		64	102.724	128.341	94.1412	-259.228	-225.488	-167.222		64	105.132	124.602	101.745	-317.014	-237.142	145.547
68	52.6204	95.2062	78.9993	-308.031	-412.166	-4.23177		68	66.9594	106.813	96.0884	-478.972	-555.837	237.892		68	109.759	90.7035	68.759	0.894	-440.564	41.7252		68	109.43	88.1765	68.0254	-76.627	-505.9	74.307		68	102.219	128.306	93.4352	-167.733	-157.564	-166.224		68	103.869	123.4	102.163	-314.236	-262.183	50.4475
72	51.4578	93.6926	78.9882	-286.264	-395.708	-32.2857		72	65.1114	104.734	96.9144	-444.55	-491.237	179.877		72	109.777	89.0095	68.8889	13.8895	-387.181	29.4909		72	109.189	86.2335	68.3723	-51.619	-460.647	33.6218		72	101.794	128.185	92.8115	-86.15	-95.6405	-127.194		72	102.618	122.161	102.148	-305.545	-321.382	-2.38037
76	50.3488	92.1708	78.8247	-267.489	-394.682	-69.9553		76	63.4231	102.93	97.5125	-411.039	-431.427	117.959		76	109.87	87.606	68.9949	23.873	-333.387	22.9216		76	109.017	84.4915	68.2944	-36.909	-406.563	14.4811		76	101.542	127.973	92.4176	-47.2535	-71.376	-115.631		76	101.425	121.088	102.144	-261.172	-313.989	-17.4208
80	49.3009	90.5866	78.4667	-250.047	-401.566	-110.962		80	61.8685	101.36	97.883	-379.932	-379.207	53.5778		80	109.968	86.343	69.0723	26.6005	-283.839	24.3211		80	108.894	82.9815	68.4881	-37.6985	-356.312	48.2855		80	101.218	127.723	91.8864	-7.6725	-54.168	-134.02		80	100.529	120.175	102.009	-183.977	-227.188	-57.4636
84	48.3323	88.9354	77.9089	-231.946	-406.224	-148.146		84	60.4156	99.9702	97.993	-350.394	-334.296	-13.0161		84	110.082	85.3355	69.1895	29.3535	-236.905	12.0702		84	108.715	81.641	68.6807	-34.8255	-297.697	96.3902		84	101.249	127.491	91.3454	41.689	-33.5465	-142.342		84	99.953	119.385	101.684	-117.982	-183.075	-14.4014
88	47.4457	87.2496	77.1902	-212.056	-399.876	-175.248		88	59.055	98.7221	97.8077	-320.23	-294.605	-80.4706		88	110.202	84.4475	69.1688	26.8955	-213.548	0.77343		88	108.615	80.6	69.2593	-31.137	-245.73	125.148		88	101.342	127.307	90.7477	92.255	-5.8845	-179.171		88	99.585	118.713	101.894	-67.4085	-177.175	-60.5545
92	46.634	85.5998	76.3833	-191.546	-378.873	-188.635		92	57.8094	97.6102	97.3244	-287.645	-258.177	-145.907		92	110.298	83.627	69.1957	16.3865	-201.399	3.40223		92	108.466	79.6755	69.6819	-37.3675	-218.713	91.6619		92	101.715	127.195	89.9121	154.432	52.0295	-215.384		92	99.414	118.197	101.2	-28.5315	-184.035	-116.097
96	45.9044	84.0829	75.5683	-173.076	-344.371	-187.389		96	56.7132	96.6475	96.5776	-252.494	-224.286	-206.142		96	110.334	82.8365	69.1961	1.4895	-204.252	-13.8884		96	108.316	78.8505	69.9925	-39.434	-196.671	76.5181		96	102.183	127.174	89.0246	178.093	92.444	-191.619		96	99.357	117.669	100.965	-0.077	-174.518	-56.5329
100	45.2657	82.7721	74.8017	-158.863	-300.603	-173.343		100	55.7836	95.8358	95.6129	-216.658	-193.538	-258.23		100	110.309	81.993	69.0846	-6.9035	-204.767	-5.51033		100	108.15	78.102	70.294	-48.663	-186.254	65.1388		100	102.661	127.254	88.3791	153.477	75.777	-90.7159		100	99.4135	117.127	100.747	17.848	-150.447	-8.22735
104	44.6924	81.6815	74.1231	-149.993	-253.627	-150.41		104	55.0096	95.1491	94.4613	-183.385	-167.365	-299.268		104	110.279	81.198	69.152	6.3775	-203.215	-1.46627		104	107.928	77.3605	70.5137	-63.6495	-193.498	48.9864		104	102.947	127.421	88.2989	67.02	5.4865	-8.2798		104	99.5	116.711	100.899	12.5705	-141.987	64.2204
108	44.1353	80.7885	73.5635	-146.871	-209.636	-122.813		108	54.3644	94.55	93.1479	-155.621	-146.864	-327.123		108	110.361	80.367	69.0728	23.142	-210.613	15.83		108	107.641	76.554	70.6859	-61.904	-193.954	35.243		108	102.939	127.628	88.3129	-25.1895	-34.009	-41.1134		108	99.514	116.336	101.261	-1.626	-133.157	87.1916
112	43.5552	80.0582	73.135	-148.498	-172.576	-94.0766		112	53.8169	94.0107	91.7278	-134.425	-131.445	-341.475		112	110.463	79.5135	69.2786	16.177	-218.446	49.4013		112	107.432	75.8085	70.7956	-53.4805	-191.776	42.1057		112	102.786	127.841	87.97	-69.823	-19.886	-87.6965		112	99.487	116.076	101.597	4.018	-95.2375	56.6301
116	42.9468	79.4619	72.8319	-151.056	-142.671	-67.1867		116	53.3354	93.5162	90.2895	-118.924	-118.936	-343.706		116	110.49	78.6195	69.4681	-9.369	-229.874	59.2546		116	107.214	75.02	71.0227	-64.579	-202.88	47.0061		116	102.627	128.038	87.6113	-79.2835	13.147	-76.2372		116	99.5455	116.017	101.714	6.464	-39.0785	-13.957
120	42.3195	78.9652	72.6338	-149.461	-117.642	-44.4085		120	52.8948	93.0602	88.9043	-107.553	-107.308	-336.131		120	110.388	77.6745	69.7527	-48.9645	-240.869	80.1921		120	106.915	74.1855	71.1716	-93.1885	-218.305	46.4134		120	102.454	128.22	87.3601	-74.585	47.293	-27.7467		120	99.5385	116.157	101.485	-10.0665	10.1445	-39.3696
124	41.6935	78.5402	72.5165	-141.256	-95.3406	-26.6986		124	52.4844	92.6475	87.5907	-99.0128	-95.7673	-321.461		124	110.099	76.693	70.1096	-98.222	-241.897	99.4234		124	106.468	73.2735	71.394	-119.227	-222.061	33.4859		124	102.283	128.391	87.3893	-73.1985	66.34	28.9764		124	99.4655	116.433	101.399	-33.7495	42.134	-47.7695
128	41.1171	78.1905	72.4566	-127.68	-74.9762	-13.7916		128	52.105	92.2871	86.3353	-92.5874	-84.4928	-301.925		128	109.603	75.739	70.548	-135.398	-231.534	125.984		128	105.962	72.409	71.4395	-142.267	-213.689	40.0038		128	102.078	128.553	87.5919	-83.7605	71.3525	61.9516		128	99.2685	116.754	101.103	-56.386	59.9025	-95.665
132	40.6355	77.931	72.433	-111.03	-56.5996	-4.96133		132	51.7547	91.9796	85.143	-88.3641	-74.3182	-277.918		132	109.016	74.8405	71.1175	-153.307	-211.012	145.64		132	105.329	71.564	71.7141	-151.101	-193.85	75.6068		132	101.815	128.698	87.8849	-98.272	65.533	75.6092		132	99.0145	117.07	100.634	-85.154	63.7215	-163.768
136	40.2508	77.7615	72.4344	-93.1237	-40.8417	0.49456		136	51.4221	91.7141	84.0501	-87.3026	-66.6353	-247.84		136	108.376	74.051	71.7132	-145.286	-182.257	154.618		136	104.753	70.8585	72.0444	-141.284	-160.017	79.2766		136	101.501	128.836	88.1968	-106.036	54.517	93.8463		136	98.587	117.252	99.7926	-113.32	53.805	-184.249
140	39.9291	77.6527	72.4525	-75.7208	-28.6849	3.35614		140	51.089	91.4747	83.0984	-90.7796	-63.0003	-210.129		140	107.853	73.3825	72.3544	-141.418	-158.678	158.008		140	104.199	70.2835	72.3483	-135.71	-128.135	80.6246		140	101.113	128.962	88.6357	-104.334	51.2185	103.998		140	98.1075	117.441	99.16	-127.391	36.3065	-130.859
144	39.6513	77.571	72.477	-60.3723	-20.8438	4.30226		144	50.7341	91.2435	82.3202	-99.7937	-64.481	-165.456		144	107.245	72.7815	72.9772	-144.967	-134.169	137.064		144	103.667	69.8335	72.6894	-127.645	-99.987	78.7411		144	100.652	129.098	89.0287	-102.26	43.7275	108.052		144	97.568	117.558	98.7457	-141.933	19.137	-148.471
148	39.4314	77.5023	72.4986	-47.534	-17.2036	3.7663		148	50.3333	90.9992	81.7409	-114.315	-71.1317	-116.497		148	106.694	72.3095	73.4509	-136.513	-108.725	147.972		148	103.178	69.484	72.9782	-120.181	-76.9055	76.5319		148	100.141	129.263	89.5001	-102.032	32.296	119.097		148	96.9725	117.654	97.9723	-149.53	13.897	-196.873
152	39.2797	77.4439	72.5124	-36.6086	-16.7328	2.27062		152	49.8593	90.7144	81.3767	-133.342	-82.0228	-66.1339		152	106.153	71.9115	74.161	-128.202	-88.5545	160.59		152	102.706	69.218	73.3016	-113.128	-57.9855	70.1671		152	99.6515	129.471	89.9815	-94.149	31.875	125.4		152	96.3715	117.721	97.1707	-148.409	21.358	-189.204
156	39.1759	77.3878	72.5174	-27.0881	-18.1019	0.668446		156	49.29	90.3666	81.2265	-155.584	-95.832	-16.1397		156	105.667	71.6005	74.7356	-116.22	-69.0255	122.122		156	102.273	69.02	73.5396	-101.15	-39.8185	83.8947		156	99.2525	129.718	90.5033	-83.4795	37.0825	120.968		156	95.785	117.794	96.4586	-131.416	46.315	-179.78
160	39.0899	77.3174	72.514	-18.7402	-19.9831	-0.0336967		160	48.6188	89.9491	81.2726	-179.89	-111.559	32.9212		160	105.224	71.3595	75.138	-104.553	-52.7545	92.9217		160	101.897	68.8995	73.9728	-88.9105	-24.8465	53.3257		160	98.929	129.988	90.9493	-67.2245	46.145	98.2194		160	95.3205	117.989	95.7325	-115.6	70.17	-169.918
164	39.0166	77.2247	72.5057	-10.8521	-20.8958	0.975768		164	47.8491	89.4685	81.4995	-204.993	-128.467	81.098		164	104.831	71.1785	75.479	-99.1425	-40.407	69.942		164	101.561	68.821	73.9662	-80.3115	-14.2555	-22.9092		164	98.712	130.276	91.2891	-45.933	58.302	78.4845		164	94.8605	118.222	95.0993	-113.873	83.9445	-153.78
168	38.9752	77.1213	72.5024	-2.32132	-19.2644	4.10279		168	46.9813	88.9279	81.9105	-229.286	-145.511	128.198		168	104.43	71.036	75.6975	-100.809	-29.466	40.1754		168	101.254	68.7855	73.7895	-79.67	-6.172	-32.0077		168	98.5905	130.583	91.5771	-26.5335	71.7255	64.0988		168	94.4095	118.493	94.5022	-111.764	100.715	-133.141
172	38.9836	77.0321	72.5181	7.18363	-13.9089	9.24993		172	46.0108	88.3157	82.5178	-251.048	-161.389	172.515		172	104.025	70.943	75.8004	-102.386	-17.253	3.08561		172	100.924	68.7715	73.7101	-78.8	-2.974	-19.8665		172	98.5535	130.915	91.8019	-6.4445	89.0695	55.2511		172	93.966	118.829	94.0341	-102.54	125.997	-116.562
176	39.0415	76.9802	72.5642	16.7416	-4.61419	15.7864		176	44.9444	87.626	83.3206	-268.608	-174.743	210.133		176	103.611	70.8985	75.7222	-103.13	-3.8045	-33.3672		176	100.624	68.7615	73.6306	-69.03	11.609	-40.2727		176	98.5935	131.278	92.0191	13.276	102.829	48.8768		176	93.5895	119.255	93.5697	-87.5735	153.375	-134.895
180	39.1367	76.9782	72.6442	25.1386	7.76418	22.7192		180	43.8098	86.8771	84.2857	-280.302	-183.922	235.894		180	103.2	70.9125	75.5335	-96.344	11.0515	-53.5598		180	100.372	68.8645	73.3879	-69.8165	22.1135	-48.0371										180	93.266	119.772	92.955	-77.6455	168.057	-103.562
184	39.2571	77.0328	72.7544	31.739	21.7297	29.1325		184	42.6441	86.102	85.3412	-284.773	-187.241	245.361		184	102.84	70.9865	75.2937	-80.46	25.547	-72.0663		184	100.065	68.9385	73.2463	-58.898	33.7185	-41.6031										184	92.968	120.351	92.7412	-66.7515	171.727	-8.82435
188	39.3971	77.1486	72.8879	36.4118	35.6993	34.4392		188	41.4806	85.3325	86.3959	-281.618	-184.053	236.447		188	102.556	71.117	74.9569	-65.8675	34.4165	-92.5217		188	99.901	69.134	73.0551	-55.158	45.8255	-62.4442										188	92.7315	121.005	92.8844	-51.6225	175.397	19.8727
192	39.5558	77.3258	73.0383	39.3055	48.2303	38.2079		192	40.3465	84.5923	87.362	-271.509	-175.147	209.995		192	102.314	71.262	74.5536	-45.43	50.206	-112.183		192	99.6235	69.305	72.7467	-57.108	54.28	-90.1761										192	92.555	121.715	92.9002	-37.879	179.773	-4.13799
196	39.7264	77.5559	73.2022	40.7764	58.0863	40.0548		196	39.2675	83.9017	88.1714	-255.756	-162.038	169.504		196	102.192	71.5185	74.0595	-26.616	73.193	-118.031		196	99.444	69.5685	72.3337	-33.1015	78.88	-108.482										196	92.4285	122.45	92.8513	-23.3505	187.718	-13.751
200	39.8967	77.8213	73.3737	41.2982	64.7414	39.8962		200	38.2677	83.2766	88.7787	-235.813	-146.158	120.391		200	102.101	71.848	73.6093	-28.4815	84.3885	-129.297		200	99.3585	69.936	71.8789	-22.979	97.4595	-178.491										200	92.368	123.212	92.7902	-11.0425	194.279	-12.8469
204	40.06	78.1019	73.5408	41.645	68.8718	38.1225		204	37.3633	82.7247	89.1564	-212.967	-128.509	68.5325		204	101.965	72.194	73.0251	-29.3905	97.3335	-132.08		204	99.26	70.348	70.9057	-22.2545	105.608	-151.7										204	92.34	123.971	92.7485	-2.741	192.989	-14.0228
208	40.2192	78.3827	73.6908	42.9859	71.8088	35.4222		208	36.5593	82.2471	89.3039	-188.307	-109.638	18.6934		208	101.865	72.626	72.5527	-15.06	118.886	-116.957		208	99.1805	70.781	70.6653	-14.406	116.608	-67.0424										208	92.3465	124.739	92.678	6.943	197.35	-39.2675
212	40.3847	78.6651	73.8207	46.2737	74.5704	32.6234		212	35.8549	81.8435	89.2502	-162.952	-89.9583	-25.8765		212	101.844	73.145	72.0894	-14.011	123.547	-129.556		212	99.145	71.2815	70.3694	-11.859	126.054	-92.835										212	92.3955	125.54	92.4344	16.4845	207.059	-46.8369
216	40.5696	78.9633	73.9386	51.4616	77.6748	30.5718		216	35.2525	81.5184	89.0363	-138.174	-70.327	-62.9984		216	101.754	73.6145	71.5162	-27.005	128.119	-148.999		216	99.086	71.7895	69.9226	-7.4715	134.839	-73.6885										216	92.4785	126.363	92.3033	24.214	214.338	-52.7019
								220	34.7549	81.2794	88.6954	-115.233	-52.0936	-91.2678		220	101.629	74.1695	70.8974	-15.8545	148.578	-156.581
																224	101.626	74.8035	70.2636	-11.4985	153.066	-162.295
																228	101.536	75.394	69.5991	-33.8255	142.486	-141.83

## Sheet: vertical GRF
Gymnast A			Gymnast B			Gymnast C			Gymnast D			Gymnast E			Gymnast F
Time (ms)	vertical GFR (N)		Time (ms)	vertical GFR (N)		Time (ms)	vertical GFR (N)		Time (ms)	vertical GFR (N)		Time (ms)	vertical GFR (N)		Time (ms)	vertical GFR (N)
0	12.9743		0	10.5766		0	9.52369		0	31.6342		0	133.792		0	28.3926
1	162.652		1	32.6612		1	159.643		1	102.412		1	315.849		1	96.3632
2	386.172		2	68.6752		2	374.342		2	200.363		2	503.57		2	190.311
3	694.349		3	125.985		3	663.104		3	328.411		3	686.361		3	313
4	1093.51		4	204.784		4	1032.45		4	487.503		4	854.493		4	465.151
5	1586.22		5	312.181		5	1485.67		5	675.915		5	1000.09		5	644.274
6	2174.65		6	445.923		6	2024.47		6	889.59		6	1118		6	843.498
7	2844.09		7	608.959		7	2651.67		7	1124.98		7	1206.46		7	1051.01
8	3575.3		8	794.59		8	3370.86		8	1384.22		8	1267.48		8	1251.21
9	4335.98		9	998.602		9	4180.2		9	1678.87		9	1306.9		9	1428.4
10	5078.76		10	1211.62		10	5061.68		10	2028.03		10	1334.16		10	1572.91
11	5735.53		11	1427.21		11	5971.31		11	2450.61		11	1361.62		11	1685.88
12	6240.87		12	1640.97		12	6836.33		12	2955.81		12	1403.74		12	1777.3
13	6536.39		13	1852.49		13	7563.14		13	3537.26		13	1475.85		13	1858.38
14	6585.59		14	2064.64		14	8056.39		14	4171.74		14	1592.92		14	1936.5
15	6380.08		15	2281.77		15	8245.43		15	4820.44		15	1768.18		15	2017.87
16	5948.75		16	2509.45		16	8108.1		16	5431.8		16	2011.84		16	2114.58
17	5363.52		17	2752.33		17	7678.54		17	5947.01		17	2329.98		17	2246.81
18	4692.43		18	3016.02		18	7033.56		18	6309.41		18	2723.67		18	2436.23
19	3997.89		19	3301.84		19	6265.19		19	6477.05		19	3188.45		19	2696.82
20	3330.15		20	3610.6		20	5455.46		20	6434.46		20	3714.22		20	3031.53
21	2725.44		21	3935.18		21	4664.94		21	6198.03		21	4285.55		21	3435.63
22	2200.32		22	4265.23		22	3934.66		22	5810.67		22	4882.37		22	3900.89
23	1762.97		23	4585.64		23	3291.88		23	5327.41		23	5481.07		23	4415.9
24	1414.31		24	4873.1		24	2751.76		24	4799.85		24	6055.88		24	4962.59
25	1151.66		25	5113.09		25	2315.68		25	4267.68		25	6580.48		25	5514.29
26	965.061		26	5274.29		26	1972.09		26	3759.06		26	7029.65		26	6037.42
27	839.498		27	5355.95		27	1702.93		27	3294.5		27	7380.97		27	6494.69
28	762.257		28	5332.05		28	1492.16		28	2888.21		28	7616.29		28	6848.61
29	721.333		29	5224.73		29	1330.45		29	2546.48		29	7722.97		29	7067.11
30	706.817		30	5031.03		30	1213.18		30	2267.1		30	7694.79		30	7131.38
31	708.999		31	4785.55		31	1135.33		31	2042.71		31	7532.36		31	7040.75
32	719.651		32	4504.8		32	1089.1		32	1865.93		32	7243.18		32	6810.37
33	731.72		33	4215.73		33	1065.59		33	1731.95		33	6841.1		33	6464.4
34	738.76		34	3935.76		34	1057.13		34	1636.89		34	6345.53		34	6031.5
35	735.869		35	3675.41		35	1057.94		35	1574.84		35	5780.11		35	5543.67
36	722.848		36	3442.54		36	1063.52		36	1537.25		36	5171.25		36	5034.57
37	703.279		37	3235.41		37	1070.02		37	1515.25		37	4546.43		37	4534.56
38	681.85		38	3053.17		38	1074.02		38	1502.42		38	3932.49		38	4065.5
39	663.082		39	2889.71		39	1073.46		39	1495.61		39	3354.07		39	3639.41
40	651.314		40	2740.84		40	1068.94		40	1493.4		40	2832.09		40	3261.48
41	649.992		41	2601.41		41	1063.48		41	1493.97		41	2382.74		41	2933.82
42	661.867		42	2468.35		42	1060.47		42	1494.88		42	2016.62		42	2656.74
43	688.817		43	2339.99		43	1061.78		43	1494.4		43	1738.52		43	2427.94
44	731.007		44	2216.21		44	1067.17		44	1492.66		44	1547.39		44	2242.25
45	786.953		45	2098.23		45	1075.59		45	1490.92		45	1436.91		45	2093.01
46	851.966		46	1987		46	1086.62		46	1489.85		46	1396.3		46	1974.11
47	921.417		47	1884.23		47	1100.45		47	1488.63		47	1411.42		47	1880.69
48	991.039		48	1790		48	1116.7		48	1485.83		48	1466.06		48	1808.26
49	1056.95		49	1705.69		49	1133.71		49	1480.9		49	1543.33		49	1751.89
50	1114.88		50	1630.33		50	1149.25		50	1474.66		50	1626.91		50	1706.61
51	1161.68		51	1564.76		51	1162.09		51	1468.16		51	1702.32		51	1668.68
52	1194.98		52	1506.87		52	1172.54		52	1461.55		52	1757.81		52	1636.19
53	1213.76		53	1456.38		53	1181.55		53	1453.89		53	1785.11		53	1608.39
54	1218.75		54	1410.38		54	1189.21		54	1444.35		54	1779.73		54	1584.4
55	1211.95		55	1367.42		55	1194.52		55	1433.1		55	1741.03		55	1562.77
56	1198.21		56	1325.13		56	1196.45		56	1421.03		56	1671.86		56	1542.1
57	1182.11		57	1281.94		57	1195.04		57	1408.65		57	1578.09		57	1521.87
58	1168.34		58	1237.04		58	1191.37		58	1395.45		58	1467.73		58	1502.47
59	1161.23		59	1189.59		59	1186.51		59	1380.52		59	1350.1		59	1484.38
60	1164.88		60	1139.9		60	1180.72		60	1363.66		60	1234.8		60	1467.56
61	1180.85		61	1087.81		61	1173.76		61	1345.65		61	1130.82		61	1451.44
62	1209.89		62	1033.96		62	1165.84		62	1327.58		62	1045.74		62	1435.57
63	1251.74		63	978.597		63	1158.01		63	1309.88		63	985.048		63	1420
64	1305.32		64	922.421		64	1151.49		64	1292.34		64	951.771		64	1405.02
65	1368.67		65	866.071		65	1146.76		65	1274.82		65	946.301		65	1390.66
66	1438.08		66	810.473		66	1143.43		66	1257.9		66	966.481		66	1376.42
67	1509.63		67	756.711		67	1140.97		67	1242.62		67	1007.93		67	1361.69
68	1578.81		68	705.835		68	1139.49		68	1229.65		68	1064.54		68	1346.28
69	1640.55		69	658.849		69	1139.67		69	1218.89		69	1129.15		69	1330.42
70	1689.57		70	616.609		70	1142.01		70	1209.86		70	1194.2		70	1314.39
71	1723.11		71	579.712		71	1146.28		71	1202.47		71	1252.51		71	1298.05
72	1740.14		72	548.859		72	1151.89		72	1197.13		72	1297.89		72	1280.98
73	1741.72		73	524.052		73	1158.55		73	1194.3		73	1325.69		73	1262.92
74	1730.09		74	505.564		74	1166.57		74	1193.84		74	1333.16		74	1244.06
75	1708.6		75	504.719		75	1176.39		75	1195.02		75	1319.63		75	1224.88
76	1681.14		76	508.203		76	1187.91		76	1197.21		76	1286.47		76	1205.75
77	1650.92		77	511.469		77	1200.39		77	1200.26		77	1236.9		77	1186.7
78	1620.72		78	515.286		78	1213.07		78	1204.37		78	1175.61		78	1167.63
79	1592.63		79	520.451		79	1225.7		79	1209.56		79	1108.26		79	1148.61
80	1567.71		80	527.269		80	1238.53		80	1215.33		80	1040.9		80	1129.99
81	1545.83		81	536.131		81	1251.68		81	1221.02		81	979.432		81	1112.13
82	1526.34		82	546.693		82	1264.83		82	1226.32		82	929.004		82	1095.2
83	1508.28		83	558.832		83	1277.44		83	1231.37		83	893.602		83	1079.1
84	1490.4		84	571.873		84	1289.21		84	1236.31		84	875.707		84	1063.8
85	1471.07		85	585.377		85	1300.23		85	1240.98		85	876.121		85	1049.44
86	1448.57		86	598.787		86	1310.66		86	1245.05		86	893.956		86	1036.34
87	1421.37		87	611.56		87	1320.31		87	1248.38		87	926.787		87	1024.66
88	1388.67		88	623.493		88	1328.64		88	1251.22		88	970.937		88	1014.33
89	1350.57		89	634.18		89	1335.28		89	1253.86		89	1021.88		89	1005.14
90	1308.46		90	643.755		90	1340.26		90	1256.28		90	1074.7		90	996.993
91	1263.99		91	652.099		91	1343.86		91	1258.24		91	1124.56		91	989.971
92	1218.64		92	659.558		92	1346.2		92	1259.58		92	1167.22		92	984.189
93	1173.84		93	666.309		93	1347.13		93	1260.44		93	1199.33		93	979.592
94	1131.13		94	672.782		94	1346.54		94	1261.09		94	1218.81		94	975.931
95	1091.85		95	679.36		95	1344.6		95	1261.62		95	1224.96		95	972.938
96	1056.92		96	686.451		96	1341.65		96	1261.84		96	1218.48		96	970.503
97	1026.87		97	694.482		97	1337.87		97	1261.62		97	1201.39		97	968.654
98	1001.85		98	703.755		98	1333.13		98	1261.03		98	1176.73		98	967.406
99	981.949		99	714.569		99	1327.29		99	1260.29		99	1148.3		99	966.638
100	966.645		100	727.064		100	1320.51		100	1259.5		100	1120.21		100	966.157
101	955.507		101	741.296		101	1313.12		101	1258.48		101	1096.49		101	965.845
102	948.079		102	757.227		102	1305.42		102	1257.01		102	1080.67		102	965.72
103	943.782		103	774.673		103	1297.41		103	1255.04		103	1075.48		103	965.851
104	941.986		104	793.475		104	1289.06		104	1252.75		104	1082.54		104	966.228
105	941.681		105	813.31		105	1280.49		105	1250.26		105	1102.27		105	966.746
106	942.045		106	833.937		106	1271.95		106	1247.51		106	1133.83		106	967.319
107	942.436		107	855.003		107	1263.62		107	1244.36		107	1175.23		107	967.98
108	942.548		108	876.235		108	1255.41		108	1240.8		108	1223.55		108	968.839
109	942.492		109	897.397		109	1247.14		109	1236.99		109	1275.19		109	969.956
110	942.704		110	918.308		110	1238.77		110	1233.11		110	1326.26		110	971.275
111	943.66		111	938.948		111	1230.45		111	1229.15		111	1372.94		111	972.709
112	945.818		112	959.283		112	1222.33		112	1224.95		112	1411.8		112	974.234
113	949.624		113	979.424		113	1214.35		113	1220.45		113	1440.19		113	975.902
114	955.633		114	999.435		114	1206.32		114	1215.74		114	1456.36		114	977.749
115	964.094		115	1019.43		115	1198.12		115	1210.95		115	1459.71		115	979.724
116	975.214		116	1039.5		116	1189.77		116	1206.12		116	1450.73		116	981.732
117	989.021		117	1059.65		117	1181.35		117	1201.12		117	1431		117	983.728
118	1005.4		118	1079.86		118	1172.76		118	1195.86		118	1402.93		118	985.748
119	1024.12		119	1100		119	1163.87		119	1190.37		119	1369.58		119	987.839
120	1044.54		120	1119.89		120	1154.58		120	1184.78		120	1334.31		120	989.973
121	1066.02		121	1139.34		121	1145.04		121	1179.15		121	1300.48		121	992.051
122	1087.76		122	1158.01		122	1135.46		122	1173.37		122	1271.1		122	993.989
123	1108.83		123	1175.71		123	1125.94		123	1167.33		123	1248.55		123	995.774
124	1128.16		124	1192.1		124	1116.47		124	1161.02		124	1234.42		124	997.431
125	1144.97		125	1206.99		125	1106.98		125	1154.58		125	1229.3		125	998.948
126	1158.65		126	1220.16		126	1097.51		126	1148.08		126	1232.81		126	1000.27
127	1168.85		127	1231.54		127	1088.17		127	1141.53		127	1243.64		127	1001.34
128	1175.47		128	1241.07		128	1079.04		128	1134.83		128	1259.7		128	1002.17
129	1178.67		129	1248.76		129	1070.08		129	1127.96		129	1278.35		129	1002.82
130	1178.98		130	1254.72		130	1061.24		130	1120.99		130	1296.66		130	1003.31
131	1176.91		131	1259.01		131	1052.55		131	1113.99		131	1311.71		131	1003.57
132	1173.07		132	1261.85		132	1044.09		132	1106.96		132	1320.9		132	1003.54
133	1168.09		133	1263.26		133	1035.9		133	1099.84		133	1322.17		133	1003.19
134	1162.55		134	1263.42		134	1027.94		134	1092.6		134	1314.18		134	1002.58
135	1156.82		135	1262.24		135	1020.09		135	1085.3		135	1296.5		135	1001.75
136	1151		136	1259.84		136	1012.2		136	1078		136	1269.56		136	1000.72
137	1144.98		137	1256		137	1004.22		137	1070.72		137	1234.65		137	999.463
138	1138.5		138	1250.85		138	996.075		138	1063.38		138	1193.75		138	997.967
139	1131.16		139	1244.14		139	987.692		139	1055.9		139	1149.36		139	996.237
140	1122.5		140	1236.07		140	978.98		140	1048.27		140	1104.24		140	994.281
141	1111.97		141	1226.38		141	969.894		141	1040.51		141	1061.11		141	992.075
142	1098.98		142	1215.39		142	960.468		142	1032.66		142	1022.46		142	989.569
143	1082.95		143	1202.93		143	950.799		143	1024.67		143	990.264		143	986.734
144	1063.86		144	1189.36		144	940.986		144	1016.49		144	965.809		144	983.588
145	1042.1		145	1174.64		145	931.094		145	1008.1		145	949.606		145	980.177
146	1018.25		146	1159.11		146	921.159		146	999.582		146	941.347		146	976.529
147	992.987		147	1142.82		147	911.204		147	991.007		147	939.952		147	972.632
148	966.949		148	1126.01		148	901.257		148	982.426		148	943.697		148	968.462
149	940.822		149	1108.74		149	891.338		149	973.847		149	950.391		149	964.02
150	915.164		150	1091.15		150	881.461		150	965.286		150	957.605		150	959.336
151	890.422		151	1073.28		151	871.634		151	956.801		151	962.914		151	954.449
152	866.923		152	1055.17		152	861.877		152	948.47		152	964.137		152	949.374
153	844.95		153	1036.83		153	852.224		153	940.344		153	959.547		153	944.101
154	824.524		154	1018.29		154	842.704		154	932.423		154	948.036		154	938.621
155	805.61		155	999.541		155	833.334		155	924.679		155	929.216		155	932.934
156	788.136		156	980.613		156	824.109		156	917.095		156	903.445		156	927.052
157	771.999		157	961.553		157	815.015		157	909.673		157	871.786		157	920.982
158	757.142		158	942.432		158	806.034		158	902.423		158	835.895		158	914.727
159	743.37		159	923.334		159	797.159		159	895.34		159	797.848		159	908.304
160	730.56		160	904.375		160	788.399		160	888.415		160	759.938		160	901.738
161	718.612		161	885.65		161	779.778		161	881.658		161	724.449		161	895.062
162	707.434		162	867.322		162	771.328		162	875.112		162	693.434		162	888.292
163	696.983		163	849.466		163	763.082		163	868.831		163	668.519		163	881.426
164	687.166		164	832.264		164	755.059		164	862.853		164	650.753		164	874.443
165	677.985		165	815.705		165	747.263		165	857.195		165	648.193		165	867.313
166	669.502		166	799.955		166	739.676		166	851.856		166	645.633		166	860.012
167	661.834		167	784.924		167	732.273		167	846.834		167	643.073		167	852.521
168	655.178		168	770.8		168	725.036		168	842.121		168	640.513		168	844.828
169	649.602		169	757.448		169	717.971		169	837.692		169	639.755		169	836.916
170	645.181		170	745.057		170	711.115		170	833.512		170	638.997		170	828.779
171	641.944		171	733.445		171	704.517		171	829.55		171	638.238		171	820.427
172	639.894		172	722.747		172	698.227		172	825.797		172	637.48		172	811.886
173	639.021		173	712.789		173	692.283		173	822.263		173	632.462		173	803.191
174	639.158		174	703.651		174	686.706		174	818.968		174	627.445		174	794.371
175	640.137		175	695.17		175	681.503		175	815.921		175	622.427		175	785.469
176	641.727		176	687.369		176	676.664		176	813.117		176	617.41		176	776.542
177	643.65		177	680.132		177	672.167		177	810.533					177	767.662
178	645.587		178	673.494		178	667.982		178	808.143					178	758.887
179	647.277		179	667.413		179	664.084		179	805.925					179	750.245
180	648.561		180	661.93		180	660.465		180	803.863					180	741.74
181	649.362		181	657.025		181	657.134		181	800.188					181	733.364
182	649.654		182	652.72		182	654.108		182	797.16					182	725.108
183	649.459		183	649.009		183	651.408		183	794.891					183	716.975
184	648.864		184	645.886		184	649.042		184	793.374					184	708.973
185	647.965		185	644.693		185	647.008		185	791.366					185	701.114
186	646.895		186	643.501		186	645.288		186	787.776					186	693.408
187	645.831		187	642.309		187	643.855		187	784.077					187	685.856
188	644.974		188	641.436		188	642.675		188	780.473					188	678.443
189	644.464		189	640.562		189	641.721		189	777.092					189	671.145
190	644.371		190	639.689		190	640.981		190	774.07					190	663.932
191	644.683		191	639.277		191	640.462		191	771.504					191	656.789
192	645.312		192	638.866		192	640.18		192	769.309					192	649.717
193	646.09		193	638.455		193	640.148		193	767.253					193	642.739
194	646.833		194	638.153		194	640.371		194	765.208					194	635.89
195	647.341		195	637.851		195	640.843		195	763.323					195	629.217
196	647.398		196	637.549		196	641.552		196	761.898					196	622.772
197	646.747		197	631.699		197	642.482		197	758.762					197	616.601
198	645.184		198	625.85		198	643.618		198	756.406					198	610.736
199	642.584		199	620.25		199	644.951		199	753.066					199	605.193
200	638.887		200	616.667		200	646.477		200	748.546					200	599.98
201	634.113		201	613.333		201	648.194		201	742.686					201	592.539
202	628.315		202	610.89		202	650.098		202	735.498					202	585.097
203	621.66		203	606.667		203	652.175		203	727.208					203	572.821
204	614.303		204	603.333		204	654.408		204	718.067					204	560.545
205	606.392		205	600		205	655.642		205	713.978					205	556.823
206	598.078		206	596.667		206	654.477		206	709.89					206	553.16
207	589.534		207	593.333		207	653.29		207	703.203					207	546.85
208	580.976		208	590.64		208	652.051		208	694.783					208	540.67
209	572.595		209	586.667		209	650.723		209	686.363					209	536.46
210	564.535		210	583.333		210	649.266		210	677.946					210	532.24
211	556.883		211	580.36		211	647.65		211	669.529					211	528.65
212	549.701		212	576.667		212	645.855		212	657.928					212	525.19
213	542.943		213	573.333		213	643.868		213	645.531					213	523.12
214	536.561		214	570.19		214	641.685		214	629.744					214	520.93
215	530.5		215	566.667		215	639.302		215	608.872					215	520.15
216	524.7		216	563.333		216	636.714		216	588					216	519.4
			217	560.48		217	633.911
			218	557.767		218	630.884
			219	555.533		219	624.258
			220	553.3		220	617.632
						221	610.899
						222	604.167
						223	599.839
						224	595.511
						225	590.44
						226	585.37
						227	581.785
						228	578.2

## Sheet: EMG
	Gymnast A									Gymnast B									Gymnast C									Gymnast D									Gymnast E									Gymnast F
Time (ms)	left RECTUS FEM.,uV	left BICEPS FEM.,uV	left TIB.ANT.,uV	left LAT. GASTRO,uV	right RECTUS FEM.,uV	right BICEPS FEM.,uV	right TIB.ANT.,uV	right LAT. GASTRO,uV		left RECTUS FEM.,uV	left BICEPS FEM.,uV	left TIB.ANT.,uV	left LAT. GASTRO,uV	right RECTUS FEM.,uV	right BICEPS FEM.,uV	right TIB.ANT.,uV	right LAT. GASTRO,uV		left RECTUS FEM.,uV	left BICEPS FEM.,uV	left TIB.ANT.,uV	left LAT. GASTRO,uV	right RECTUS FEM.,uV	right BICEPS FEM.,uV	right TIB.ANT.,uV	right LAT. GASTRO,uV		left RECTUS FEM.,uV	left BICEPS FEM.,uV	left TIB.ANT.,uV	left LAT. GASTRO,uV	right RECTUS FEM.,uV	right BICEPS FEM.,uV	right TIB.ANT.,uV	right LAT. GASTRO,uV		left RECTUS FEM.,uV	left BICEPS FEM.,uV	left TIB.ANT.,uV	left LAT. GASTRO,uV	right RECTUS FEM.,uV	right BICEPS FEM.,uV	right TIB.ANT.,uV	right LAT. GASTRO,uV		left RECTUS FEM.,uV	left BICEPS FEM.,uV	left TIB.ANT.,uV	left LAT. GASTRO,uV
0	2.2674	0.07262	2.3557	4.6664	2.5929	0.89468	2.3019	2.1706		1.205	5.7557	2.9489	1.7029	1.1081	1.9553	5.2301	2.3948		3.0814	6.9241	0.32664	1.6672	1.1309	0.0236	2.5483	2.268		0.71123	0.28053	2.4999	0.80653	0.84161	13.782	0.61207	9.5072		463.73	39.262	16.427	20.013	67.754	6.063	51.804	23.095		0.51752	29.834	2.8048	22.853
0.519231	2.5081	0.079557	2.7127	5.0269	2.9198	0.99848	2.5758	2.4125		1.3161	6.807	3.4988	1.9026	1.2192	2.1331	5.639	2.6766		3.5604	7.4263	0.3716	1.7722	1.2045	0.33683	2.8269	2.406		0.77599	0.30712	2.7028	0.87331	0.92172	15.407	0.66395	10.141		517.38	41.78	19.248	22.406	78.278	6.2912	56.107	27.115		0.63052	32.092	3.0416	24.17
1.03846	2.7542	0.086384	3.0862	5.3757	3.2488	1.1021	2.855	2.6512		1.4242	7.9298	4.0751	2.1068	1.3296	2.3037	6.0189	2.9628		4.0584	7.8874	0.41766	1.8704	1.2716	0.81707	3.1067	2.5331		0.8381	0.33408	2.8926	0.93763	1.0004	17.022	0.71496	10.733		569.78	44.144	22.199	24.821	89.128	6.4954	60.334	31.341		0.75273	34.249	3.2641	25.367
1.55769	3.0043	0.093034	3.4739	5.7109	3.5763	1.2045	3.1372	2.8838		1.5283	9.1188	4.6724	2.3139	1.4383	2.4646	6.3635	3.2513		4.5714	8.3001	0.46443	1.961	1.3314	1.4312	3.3849	2.6483		0.89676	0.36133	3.0663	0.9988	1.0769	18.604	0.76477	11.278		620.11	46.339	25.258	27.236	100.2	6.679	64.461	35.739		0.88358	36.285	3.4687	26.432
2.07692	3.2575	0.099449	3.8739	6.0311	3.8988	1.3044	3.4204	3.1074		1.6272	10.368	5.2843	2.5222	1.5445	2.6136	6.6671	3.5399		5.0952	8.658	0.5115	2.0437	1.3833	2.1927	3.6591	2.7507		0.95123	0.38881	3.2212	1.0562	1.1504	20.133	0.81313	11.771		667.53	48.356	28.396	29.631	111.38	6.847	68.467	40.271		1.0224	38.185	3.6522	27.361
2.59615	3.5126	0.10557	4.2839	6.3354	4.213	1.4008	3.7022	3.3195		1.7197	11.671	5.9044	2.7301	1.647	2.7484	6.9249	3.8266		5.6253	8.9556	0.55845	2.1184	1.4271	3.1142	3.9268	2.8399		1.0009	0.41651	3.3547	1.1094	1.2203	21.588	0.85983	12.21		711.28	50.193	31.584	31.989	122.55	7.0059	72.337	44.895		1.1682	39.935	3.8116	28.151
3.11538	3.7687	0.11136	4.7018	6.624	4.5155	1.4924	3.9804	3.5176		1.805	13.018	6.5252	2.9358	1.7451	2.8672	7.1328	4.1093		6.1571	9.1888	0.60488	2.1852	1.4627	4.2069	4.1855	2.9159		1.0452	0.4444	3.4649	1.1579	1.286	22.948	0.90471	12.593		750.6	51.855	34.792	34.292	133.61	7.1634	76.061	49.565		1.3199	41.526	3.9445	28.802
3.63461	4.0248	0.11676	5.1255	6.8976	4.8034	1.5784	4.2529	3.6999		1.8822	14.402	7.1392	3.1371	1.8378	2.9682	7.2875	4.3864		6.6859	9.3546	0.65042	2.2445	1.4902	5.4805	4.4329	2.9787		1.0839	0.4725	3.55	1.2014	1.3469	24.193	0.9477	12.923		784.84	53.349	37.988	36.529	144.43	7.3281	79.634	54.232		1.4764	42.953	4.0491	29.321
4.15385	4.2798	0.12175	5.553	7.1574	5.0741	1.6579	4.5174	3.8649		1.9507	15.811	7.7385	3.3324	1.9243	3.05	7.3869	4.6561		7.207	9.4515	0.6947	2.2969	1.5101	6.9421	4.667	3.0288		1.1166	0.50081	3.6089	1.2396	1.4027	25.305	0.98874	13.199		813.43	54.692	41.138	38.688	154.9	7.5095	83.054	58.845		1.6363	44.213	4.124	29.714
4.67308	4.5329	0.12631	5.9825	7.4055	5.3254	1.7299	4.7718	4.0114		2.0099	17.237	8.3149	3.5194	2.0039	3.1115	7.4298	4.9172		7.7159	9.4792	0.73741	2.3433	1.5232	8.5965	4.8857	3.0669		1.1433	0.52938	3.6408	1.2724	1.4529	26.268	1.0278	13.425		835.91	55.9	44.21	40.764	164.92	7.7173	86.325	63.35		1.798	45.305	4.1686	29.994
5.19231	4.783	0.13041	6.4124	7.6444	5.5556	1.7939	5.0141	4.1391		2.0596	18.667	8.8604	3.6963	2.0759	3.1518	7.4163	5.1684		8.2082	9.4389	0.77828	2.3845	1.5305	10.445	5.0872	3.0939		1.164	0.55823	3.6455	1.2996	1.4975	27.067	1.065	13.605		851.97	56.998	47.171	42.754	174.39	7.9613	89.452	67.695		1.9599	46.234	4.1827	30.173
5.71154	5.0293	0.13405	6.8415	7.8767	5.7633	1.8494	5.2425	4.2484		2.0995	20.09	9.3669	3.8611	2.1398	3.1705	7.3475	5.4089		8.6799	9.333	0.81709	2.4218	1.5334	12.486	5.2701	3.1108		1.1791	0.5874	3.6233	1.3213	1.5361	27.692	1.1003	13.743		861.4	58.009	49.989	44.66	183.24	8.2509	92.443	71.828		2.1202	47.002	4.1672	30.266
6.23077	5.2707	0.13722	7.2685	8.1057	5.9477	1.8959	5.4553	4.3401		2.1298	21.493	9.827	4.0118	2.195	3.1676	7.2256	5.6382		9.127	9.1652	0.85367	2.4563	1.5334	14.714	5.433	3.1188		1.1889	0.61691	3.5749	1.3376	1.5689	28.133	1.1337	13.845		864.16	58.96	52.634	46.487	191.4	8.5946	95.306	75.699		2.2771	47.616	4.1231	30.288
6.75	5.5063	0.13993	7.6928	8.3343	6.1084	1.9333	5.651	4.4161		2.1505	22.863	10.233	4.1468	2.2411	3.1433	7.0537	5.8559		9.5463	8.9401	0.88792	2.4893	1.5321	17.118	5.5748	3.1192		1.1938	0.64678	3.5014	1.3484	1.5959	28.386	1.1653	13.916		860.36	59.879	55.079	48.243	198.82	8.9997	98.051	79.263		2.4286	48.084	4.0523	30.255
7.26923	5.7353	0.14219	8.1138	8.5657	6.2453	1.9615	5.8286	4.479		2.1621	24.189	10.58	4.2644	2.2779	3.0982	6.836	6.0621		9.9348	8.6636	0.91979	2.5221	1.5316	19.685	5.6948	3.1133		1.1945	0.67699	3.4044	1.3539	1.6171	28.447	1.1951	13.961		850.22	60.792	57.298	49.938	205.46	9.4719	100.69	82.478		2.5729	48.411	3.9571	30.18
7.78846	5.9566	0.144	8.5311	8.8026	6.3587	1.9807	5.9871	4.532		2.1651	25.458	10.86	4.3633	2.3051	3.0335	6.5774	6.257		10.29	8.342	0.94929	2.5558	1.5337	22.395	5.7924	3.1023		1.1915	0.70754	3.2856	1.3545	1.6328	28.32	1.223	13.985		834.14	61.724	59.268	51.587	211.29	10.015	103.22	85.312		2.708	48.607	3.8403	30.076
8.30769	6.1694	0.14539	8.9446	9.0474	6.4493	1.991	6.1261	4.5794		2.16	26.657	11.071	4.4427	2.3227	2.9505	6.2838	6.4413		10.611	7.9827	0.97649	2.5915	1.5405	25.226	5.8675	3.0873		1.1858	0.73836	3.1474	1.3502	1.6431	28.008	1.2491	13.993		812.61	62.699	60.972	53.202	216.33	10.629	105.66	87.738		2.8321	48.678	3.7049	29.956
8.82692	6.3727	0.14637	9.3541	9.3022	6.5178	1.9928	6.2457	4.6262		2.1475	27.776	11.207	4.5019	2.3309	2.851	5.9614	6.6158		10.895	7.5934	1.0015	2.6302	1.5541	28.15	5.9201	3.0697		1.1778	0.76938	2.9921	1.3413	1.6485	27.522	1.2734	13.988		786.23	63.737	62.394	54.798	220.59	11.315	108.01	89.741		2.9434	48.632	3.5542	29.828
9.34615	6.5655	0.14698	9.7596	9.568	6.5652	1.9868	6.3461	4.678		2.1285	28.802	11.269	4.5407	2.3298	2.7369	5.6169	6.7815		11.143	7.1822	1.0244	2.6727	1.5763	31.136	5.9505	3.0503		1.1686	0.80049	2.8223	1.3282	1.6493	26.871	1.2956	13.974		755.7	64.856	63.523	56.385	224.09	12.067	110.26	91.313		3.0403	48.477	3.3915	29.697
9.86539	6.7469	0.14723	10.161	9.8455	6.5923	1.9734	6.4282	4.7414		2.1036	29.726	11.253	4.5595	2.32	2.6106	5.2574	6.9394		11.355	6.7573	1.0455	2.7196	1.609	34.149	5.9593	3.0299		1.1586	0.83157	2.6407	1.3114	1.6457	26.072	1.3159	13.954		721.77	66.068	64.352	57.975	226.87	12.879	112.43	92.462		3.1214	48.219	3.2202	29.569
10.3846	6.9158	0.14716	10.558	10.134	6.6001	1.9536	6.4932	4.8236		2.0739	30.539	11.163	4.5591	2.3019	2.4745	4.8899	7.0908		11.531	6.327	1.0649	2.7713	1.654	37.153	5.9472	3.0094		1.1487	0.86245	2.4501	1.2911	1.6383	25.142	1.3339	13.927		685.24	67.384	64.88	59.576	228.98	13.742	114.5	93.202		3.1856	47.867	3.0437	29.443
10.9039	7.0713	0.14681	10.95	10.433	6.5896	1.9281	6.5426	4.9324		2.04	31.232	10.999	4.5407	2.2763	2.3312	4.5215	7.2368		11.674	5.8994	1.0828	2.828	1.7126	40.108	5.9153	2.9893		1.1394	0.89296	2.2533	1.268	1.6274	24.1	1.3497	13.896		646.92	68.808	65.109	61.192	230.5	14.643	116.46	93.564		3.2321	47.427	2.8653	29.319
11.4231	7.2123	0.1462	11.336	10.74	6.5614	1.8978	6.5781	5.0762		2.0029	31.798	10.765	4.5062	2.2442	2.1835	4.1591	7.3785		11.784	5.4823	1.0994	2.8895	1.7863	42.974	5.8647	2.9698		1.1313	0.92291	2.0531	1.2425	1.6134	22.968	1.3631	13.86		607.63	70.343	65.045	62.823	231.49	15.569	118.33	93.586		3.2604	46.908	2.6881	29.193
11.9423	7.3378	0.14538	11.715	11.052	6.5162	1.8636	6.6017	5.2636		1.9634	32.233	10.466	4.4578	2.2066	2.0341	3.809	7.5168		11.865	5.0828	1.1149	2.9554	1.8758	45.71	5.7967	2.9511		1.1247	0.95208	1.8522	1.2154	1.5968	21.767	1.374	13.819		568.14	71.985	64.7	64.466	232.03	16.502	120.07	93.321		3.2704	46.32	2.5147	29.059
12.4615	7.4468	0.14438	12.085	11.366	6.4545	1.8264	6.6157	5.5038		1.9222	32.532	10.108	4.3979	2.1646	1.8855	3.4775	7.6522		11.92	4.7078	1.1294	3.0252	1.9819	48.278	5.7129	2.9333		1.12	0.98027	1.6533	1.1872	1.5781	20.519	1.3824	13.77		529.2	73.728	64.09	66.113	232.21	17.425	121.69	92.83		3.2626	45.673	2.3478	28.912
12.9808	7.5384	0.14326	12.445	11.675	6.3767	1.7873	6.622	5.8057		1.8801	32.693	9.6975	4.3292	2.1196	1.7404	3.17	7.7852		11.952	4.3631	1.1429	3.098	2.1049	50.639	5.6148	2.9162		1.1174	1.0073	1.4588	1.1587	1.5577	19.246	1.3881	13.714		491.46	75.56	63.235	67.753	232.13	18.319	123.18	92.18		3.2378	44.978	2.1895	28.744
13.5	7.6118	0.14205	12.791	11.976	6.283	1.7472	6.6231	6.1785		1.8376	32.715	9.243	4.2549	2.0727	1.6011	2.8912	7.9156		11.966	4.0539	1.1556	3.1727	2.2448	52.759	5.5042	2.8996		1.1168	1.0328	1.2712	1.1307	1.5362	17.97	1.3911	13.649		455.52	77.469	62.159	69.372	231.88	19.165	124.53	91.449		3.1972	44.248	2.0419	28.547
14.0192	7.6663	0.1408	13.123	12.262	6.1736	1.7069	6.6208	6.6309		1.7953	32.598	8.7525	4.1777	2.0254	1.4698	2.6453	8.0429		11.965	3.7844	1.1675	3.2483	2.4012	54.608	5.3829	2.8831		1.1183	1.0568	1.0927	1.1039	1.5139	16.71	1.3914	13.573		421.88	79.436	60.89	70.952	231.55	19.944	125.72	90.716		3.1427	43.501	1.9064	28.314
14.5385	7.7014	0.13955	13.435	12.527	6.0486	1.6672	6.6173	7.1709		1.7539	32.346	8.235	4.1008	1.9788	1.3483	2.4358	8.1663		11.953	3.558	1.1786	3.3233	2.5735	56.16	5.2527	2.8664		1.1217	1.079	0.92532	1.0792	1.4915	15.485	1.389	13.486		390.94	81.441	59.46	72.473	231.26	20.638	126.75	90.064		3.0763	42.75	1.7844	28.039
15.0577	7.7169	0.13835	13.726	12.764	5.9082	1.629	6.6144	7.8059		1.7135	31.961	7.6993	4.0269	1.9342	1.2382	2.2651	8.2844		11.934	3.377	1.1888	3.3963	2.7605	57.394	5.1157	2.849		1.1266	1.0993	0.771	1.0573	1.4693	14.311	1.3839	13.388		363	83.46	57.904	73.915	231.09	21.23	127.63	89.574		3.0007	42.016	1.6768	27.715
15.5769	7.7127	0.13724	13.991	12.966	5.7528	1.5928	6.6138	8.542		1.6747	31.45	7.1545	3.9587	1.8927	1.1407	2.1353	8.3954		11.913	3.2429	1.1981	3.466	2.9608	58.298	4.974	2.8305		1.1328	1.1176	0.63147	1.039	1.4478	13.202	1.3764	13.278		338.26	85.468	56.259	75.257	231.14	21.706	128.33	89.326		2.9186	41.316	1.5843	27.338
16.0962	7.689	0.13627	14.228	13.128	5.5826	1.5594	6.617	9.3843		1.6377	30.819	6.6094	3.8982	1.8552	1.0568	2.0473	8.4973		11.893	3.1562	1.2065	3.5306	3.1727	58.862	4.8296	2.8106		1.1398	1.1339	0.50834	1.025	1.4276	12.169	1.3666	13.158		316.81	87.437	54.565	76.479	231.49	22.056	128.86	89.392		2.8331	40.67	1.5073	26.905
16.6154	7.646	0.13546	14.433	13.244	5.3982	1.529	6.6255	10.336		1.6028	30.075	6.0722	3.8476	1.8225	0.98703	2.0016	8.5877		11.876	3.1164	1.2138	3.589	3.3942	59.087	4.6847	2.7889		1.1471	1.1481	0.40301	1.0161	1.4089	11.223	1.3546	13.029		298.67	89.337	52.862	77.563	232.22	22.272	129.23	89.835		2.7474	40.096	1.4458	26.414
17.1346	7.5846	0.13485	14.601	13.309	5.2004	1.5022	6.6404	11.399		1.5701	29.227	5.551	3.8079	1.795	0.93161	1.9979	8.6639		11.867	3.1223	1.2201	3.6396	3.6228	58.98	4.5416	2.7652		1.1542	1.1603	0.31675	1.013	1.3922	10.37	1.3409	12.893		283.75	91.137	51.192	78.492	233.4	22.35	129.43	90.708		2.6648	39.612	1.3998	25.866
17.6538	7.5055	0.13447	14.73	13.318	4.9902	1.4791	6.6628	12.572		1.5397	28.285	5.0529	3.7802	1.773	0.89044	2.0354	8.7232		11.867	3.1718	1.2254	3.6812	3.8561	58.553	4.4025	2.7393		1.1605	1.1707	0.25065	1.016	1.3778	9.6149	1.3257	12.755		271.9	92.807	49.596	79.254	235.05	22.29	129.48	92.049		2.5886	39.236	1.3689	25.261
18.1731	7.4097	0.13433	14.816	13.269	4.7686	1.4599	6.6935	13.854		1.5117	27.259	4.5844	3.7647	1.7568	0.86311	2.1126	8.7626		11.877	3.2621	1.2298	3.7127	4.0914	57.83	4.2696	2.7114		1.1656	1.1793	0.20566	1.0258	1.3661	8.96	1.3095	12.616		262.9	94.314	48.115	79.84	237.2	22.099	129.38	93.88		2.522	38.98	1.3529	24.604
18.6923	7.2984	0.13444	14.856	13.16	4.5373	1.4447	6.7332	15.239		1.4861	26.159	4.1511	3.7612	1.7461	0.84895	2.2276	8.7794		11.899	3.3897	1.2332	3.733	4.3256	56.836	4.1452	2.6816		1.1688	1.1864	0.18252	1.0427	1.3573	8.4053	1.2928	12.481		256.47	95.63	46.787	80.247	239.86	21.785	129.15	96.205		2.4677	38.856	1.351	23.897
19.2115	7.1728	0.13482	14.848	12.99	4.2979	1.4333	6.7823	16.721		1.463	24.998	3.7578	3.7688	1.7405	0.84703	2.3781	8.7708		11.933	3.5508	1.2359	3.7414	4.5559	55.607	4.0313	2.6503		1.1698	1.1923	0.18181	1.0668	1.3515	7.9488	1.2761	12.355		252.32	96.725	45.651	80.474	242.99	21.362	128.8	99.009		2.4285	38.872	1.3626	23.146
19.7308	7.0343	0.13546	14.791	12.76	4.0523	1.4257	6.841	18.289		1.4423	23.787	3.4083	3.7863	1.7396	0.85622	2.5616	8.7345		11.977	3.7408	1.2381	3.7374	4.7793	54.183	3.9301	2.6182		1.1681	1.1971	0.20392	1.0983	1.3489	7.5866	1.26	12.24		250.09	97.574	44.738	80.529	246.56	20.848	128.35	102.26		2.4067	39.033	1.387	22.358
20.25	6.8845	0.13635	14.683	12.473	3.8028	1.4217	6.9091	19.931		1.4238	22.539	3.1057	3.812	1.7427	0.87524	2.775	8.6683		12.031	3.955	1.2401	3.7204	4.9928	52.608	3.8433	2.5859		1.1636	1.2014	0.24904	1.1371	1.3495	7.3132	1.2451	12.14		249.44	98.156	44.079	80.421	250.48	20.264	127.81	105.91		2.4039	39.337	1.4234	21.538
20.7692	6.725	0.13747	14.525	12.131	3.5515	1.4209	6.9863	21.635		1.4075	21.266	2.852	3.8436	1.7489	0.90265	3.0154	8.5706		12.092	4.1885	1.2422	3.6905	5.1937	50.931	3.7728	2.5546		1.156	1.2052	0.31713	1.1829	1.3533	7.1216	1.232	12.06		249.99	98.456	43.699	80.167	254.66	19.635	127.19	109.88		2.4217	39.783	1.4712	20.695
21.2885	6.5574	0.1388	14.316	11.74	3.301	1.423	7.0719	23.382		1.3933	19.982	2.6485	3.8789	1.7574	0.93694	3.2794	8.4403		12.157	4.436	1.2449	3.6477	5.3793	49.202	3.7199	2.5254		1.1451	1.2089	0.40795	1.2353	1.3603	7.0036	1.2213	12.001		251.41	98.463	43.617	79.789	258.99	18.987	126.5	114.09		2.4607	40.36	1.5297	19.837
21.8077	6.3836	0.14032	14.06	11.306	3.0538	1.4277	7.1649	25.154		1.3809	18.7	2.4957	3.9152	1.7672	0.97656	3.5638	8.277		12.224	4.6923	1.2484	3.5924	5.547	47.472	3.6859	2.4998		1.131	1.2127	0.52099	1.2938	1.3702	6.9502	1.2137	11.965		253.36	98.173	43.847	79.311	263.35	18.348	125.76	118.44		2.5212	41.058	1.5983	18.971
22.3269	6.2057	0.14198	13.758	10.835	2.8127	1.4345	7.2638	26.932		1.3701	17.434	2.3934	3.9498	1.7775	1.0199	3.865	8.0807		12.287	4.9523	1.2533	3.5251	5.6947	45.791	3.6717	2.4791		1.1139	1.2169	0.65552	1.3577	1.3827	6.9516	1.2096	11.953		255.52	97.592	44.396	78.766	267.59	17.748	124.97	122.82		2.6028	41.859	1.6766	18.107
22.8461	6.0257	0.14376	13.415	10.334	2.5804	1.4431	7.3672	28.693		1.3609	16.199	2.3408	3.98	1.7875	1.0654	4.1796	7.8523		12.344	5.2109	1.2601	3.4467	5.8203	44.206	3.678	2.4651		1.0938	1.2217	0.8105	1.426	1.3976	6.9979	1.2095	11.964		257.61	96.732	45.264	78.189	271.57	17.217	124.13	127.11		2.7045	42.746	1.7644	17.253
23.3654	5.846	0.14561	13.035	9.8134	2.3596	1.4531	7.4729	30.414		1.3528	15.007	2.3364	4.0032	1.7965	1.1115	4.5042	7.5933		12.389	5.463	1.2692	3.358	5.9222	42.761	3.7049	2.4594		1.071	1.2271	0.98465	1.4979	1.4144	7.0788	1.2139	11.998		259.39	95.611	46.442	77.618	275.14	16.782	123.24	131.19		2.825	43.695	1.8614	16.417
23.8846	5.6691	0.14749	12.624	9.2802	2.1529	1.4641	7.5789	32.073		1.3458	13.874	2.3781	4.0171	1.804	1.1568	4.8349	7.3059		12.42	5.7042	1.2811	3.2604	5.9991	41.493	3.7523	2.464		1.046	1.2333	1.1764	1.5722	1.4326	7.1844	1.2231	12.052		260.64	94.256	47.914	77.097	278.16	16.473	122.29	134.95		2.9622	44.683	1.9678	15.61
24.4039	5.4976	0.14936	12.187	8.7434	1.963	1.4757	7.6827	33.646		1.3395	12.811	2.4636	4.0196	1.8097	1.1998	5.1684	6.9929		12.431	5.9299	1.2962	3.1551	6.0499	40.435	3.8196	2.4804		1.0191	1.2402	1.3838	1.6476	1.4517	7.3051	1.2372	12.123		261.19	92.701	49.66	76.671	280.5	16.313	121.27	138.25		3.1135	45.685	2.0839	14.838
24.9231	5.3343	0.15116	11.731	8.2116	1.7924	1.4876	7.782	35.112		1.3339	11.833	2.5898	4.0092	1.8138	1.2392	5.5008	6.6577		12.421	6.1362	1.3148	3.0435	6.074	39.611	3.9058	2.5105		0.99083	1.2478	1.6049	1.7231	1.4711	7.4318	1.2564	12.207		260.92	90.983	51.647	76.386	282.03	16.327	120.17	141		3.2763	46.676	2.21	14.11
25.4423	5.1818	0.15287	11.263	7.6931	1.6434	1.4996	7.8741	36.447		1.3288	10.95	2.7536	3.9849	1.8163	1.274	5.8284	6.3041		12.387	6.3195	1.3373	2.9272	6.071	39.037	4.0097	2.5558		0.96162	1.2559	1.8371	1.7971	1.4903	7.5563	1.2805	12.301		259.74	89.145	53.842	76.29	282.66	16.535	118.99	143.09		3.4472	47.63	2.3468	13.434
25.9615	5.043	0.15443	10.79	7.1955	1.5182	1.5113	7.9566	37.634		1.324	10.173	2.9514	3.946	1.8178	1.3031	6.1474	5.9365		12.326	6.4767	1.364	2.8078	6.0412	38.723	4.1293	2.6178		0.93202	1.2644	2.0777	1.8686	1.5086	7.6712	1.3096	12.398		257.59	87.23	56.201	76.429	282.29	16.953	117.71	144.44		3.6227	48.523	2.495	12.816
26.4808	4.9206	0.15581	10.319	6.7259	1.4187	1.5225	8.0271	38.655		1.3195	9.513	3.1793	3.8928	1.8191	1.3258	6.4539	5.5595		12.239	6.6054	1.3949	2.6868	5.9849	38.668	4.2625	2.6977		0.90256	1.273	2.3239	1.9361	1.5254	7.7702	1.3432	12.495		254.46	85.284	58.68	76.846	280.85	17.595	116.32	144.99		3.7993	49.335	2.6554	12.261
27	4.8169	0.15698	9.8569	6.2904	1.3464	1.5332	8.0835	39.496		1.3152	8.9765	3.4334	3.8258	1.8211	1.3414	6.744	5.178		12.126	6.7036	1.4302	2.5659	5.903	38.866	4.4069	2.7967		0.87375	1.2814	2.5726	1.9984	1.5403	7.8481	1.381	12.586		250.37	83.35	61.228	77.579	278.31	18.468	114.83	144.69		3.9731	50.046	2.8288	11.774
27.5192	4.7343	0.1579	9.4092	5.8941	1.3025	1.5431	8.124	40.144		1.3112	8.5701	3.7093	3.7464	1.825	1.3495	7.0138	4.7968		11.987	6.7702	1.4698	2.4464	5.7965	39.301	4.5598	2.9154		0.84612	1.2893	2.8203	2.0544	1.5529	7.9008	1.4224	12.668		245.36	81.47	63.796	78.662	274.63	19.577	113.22	143.52		4.1404	50.641	3.0159	11.359
28.0385	4.6746	0.15857	8.9818	5.5412	1.2881	1.5522	8.1471	40.593		1.3075	8.2985	4.0028	3.6563	1.8322	1.3498	7.2594	4.4209		11.825	6.8049	1.5136	2.3299	5.6671	39.953	4.7182	3.0544		0.82014	1.2963	3.0639	2.1028	1.5629	7.9254	1.4671	12.737		239.51	79.683	66.331	80.122	269.82	20.921	111.5	141.48		4.2974	51.109	3.2173	11.016
28.5577	4.6393	0.15895	8.58	5.2347	1.3036	1.5603	8.1516	40.837		1.3043	8.164	4.3093	3.558	1.8442	1.3424	7.4772	4.0552		11.643	6.8083	1.5614	2.2177	5.5164	40.793	4.8791	3.2139		0.79625	1.302	3.2997	2.1428	1.57	7.9202	1.5141	12.79		232.91	78.02	68.781	81.975	263.91	22.497	109.68	138.59		4.4406	51.442	3.4333	10.746
29.0769	4.6294	0.15903	8.2078	4.9762	1.3492	1.5675	8.137	40.876		1.3019	8.1673	4.6243	3.4541	1.8624	1.3274	7.6634	3.7043		11.444	6.7817	1.6128	2.1109	5.3466	41.792	5.0394	3.3936		0.77486	1.3059	3.5244	2.1734	1.5742	7.8845	1.5629	12.825		225.66	76.509	71.099	84.231	256.92	24.296	107.77	134.9		4.5665	51.638	3.6641	10.548
29.5962	4.6455	0.15882	7.8688	4.7665	1.4243	1.5738	8.1031	40.715		1.3004	8.3067	4.9434	3.3476	1.8883	1.3052	7.8148	3.3726		11.233	6.7278	1.6675	2.0106	5.1597	42.913	5.1962	3.5929		0.75632	1.3079	3.7345	2.1939	1.5757	7.8187	1.6126	12.842		217.89	75.171	73.236	86.886	248.94	26.303	105.78	130.46		4.6721	51.698	3.9094	10.418
30.1154	4.6874	0.15831	7.5651	4.605	1.5283	1.579	8.0503	40.36		1.3	8.5786	5.2618	3.2419	1.9233	1.2762	7.9284	3.0643		11.014	6.6501	1.7247	1.9177	4.9584	44.119	5.3466	3.811		0.74095	1.3073	3.927	2.2038	1.5745	7.7241	1.6625	12.842		209.72	74.019	75.152	89.93	240.04	28.502	103.74	125.37		4.7545	51.627	4.1683	10.353
30.6346	4.7546	0.15751	7.2985	4.4904	1.6598	1.5833	7.9793	39.824		1.3012	8.9774	5.5753	3.1404	1.9688	1.2413	8.0016	2.7829		10.79	6.5529	1.784	1.8328	4.7451	45.373	5.488	4.0465		0.72897	1.3039	4.0987	2.2029	1.5711	7.6029	1.7117	12.824		201.28	73.061	76.808	93.339	230.34	30.874	101.65	119.72		4.8113	51.433	4.4397	10.347
31.1539	4.8459	0.15644	7.0691	4.4199	1.817	1.5867	7.8914	39.123		1.3041	9.4954	5.8794	3.0463	2.0258	1.2011	8.0322	2.5316		10.567	6.442	1.8445	1.7566	4.5225	46.635	5.6183	4.2976		0.72059	1.2974	4.2472	2.1909	1.5659	7.4578	1.7595	12.793		192.7	72.298	78.171	97.082	219.95	33.394	99.536	113.62		4.8405	51.129	4.7219	10.393
31.6731	4.9595	0.15513	6.8767	4.3903	1.9975	1.5893	7.7884	38.274		1.3091	10.123	6.1698	2.963	2.0952	1.1565	8.0189	2.3132		10.348	6.3237	1.9057	1.6894	4.2932	47.869	5.7356	4.5623		0.71592	1.2874	4.37	2.168	1.5594	7.2922	1.8052	12.75		184.11	71.724	79.216	101.12	209.01	36.037	97.418	107.2		4.8406	50.729	5.0125	10.482
32.1923	5.0931	0.15358	6.7199	4.3974	2.1986	1.5909	7.6724	37.301		1.3164	10.849	6.4426	2.8934	2.1777	1.1085	7.9607	2.1297		10.135	6.2054	1.9668	1.6315	4.0601	49.039	5.8387	4.838		0.71505	1.2739	4.4655	2.1344	1.5521	7.1096	1.8481	12.701		175.61	71.33	79.922	105.4	197.66	38.776	95.311	100.57		4.8105	50.248	5.3089	10.606
32.7115	5.244	0.15184	6.5964	4.4361	2.4171	1.5918	7.5458	36.228		1.3262	11.66	6.694	2.8404	2.2736	1.058	7.8572	1.9826		9.9303	6.0951	2.0269	1.583	3.8257	50.115	5.9269	5.1219		0.71798	1.2566	4.5321	2.0906	1.5446	6.9141	1.8877	12.649		167.31	71.102	80.275	109.86	186.06	41.583	93.227	93.868		4.7499	49.702	5.6078	10.756
33.2308	5.4091	0.14994	6.5034	4.5012	2.6493	1.592	7.4115	35.081		1.3388	12.542	6.9205	2.8061	2.3828	1.0061	7.7091	1.8728		9.7361	6.0014	2.0853	1.5437	3.5928	51.066	6.0002	5.4108		0.72466	1.2355	4.5692	2.0372	1.5374	6.7095	1.9233	12.599		159.31	71.023	80.268	114.45	174.36	44.428	91.179	87.225		4.6589	49.11	5.9056	10.922
33.75	5.5847	0.14791	6.4375	4.5868	2.8911	1.5915	7.2724	33.887		1.3542	13.48	7.1189	2.7923	2.5053	0.95369	7.5175	1.8005		9.5526	5.9333	2.1414	1.5136	3.3639	51.869	6.0592	5.7014		0.735	1.2107	4.5764	1.9752	1.531	6.4997	1.9547	12.554		151.67	71.072	79.9	119.1	162.72	47.283	89.172	80.767		4.5381	48.487	6.1984	11.094
34.2692	5.7671	0.1458	6.395	4.687	3.1384	1.5904	7.1316	32.674		1.3725	14.455	7.2867	2.8005	2.6402	0.90183	7.2842	1.7651		9.3795	5.8999	2.1944	1.4922	3.1414	52.503	6.105	5.9898		0.74884	1.1823	4.5542	1.9055	1.5257	6.2882	1.9813	12.518		144.46	71.228	79.175	123.75	151.29	50.119	87.211	74.617		4.3889	47.849	6.482	11.261
34.7885	5.9523	0.14364	6.3717	4.7955	3.3866	1.5887	6.9923	31.469		1.3937	15.453	7.4216	2.8312	2.7868	0.85143	7.0118	1.7657		9.2157	5.9102	2.2438	1.4791	2.9275	52.952	6.1392	6.2726		0.76597	1.1505	4.5034	1.8292	1.5219	6.0784	2.003	12.495		137.72	71.469	78.106	128.32	140.21	52.911	85.295	68.886		4.2132	47.21	6.7521	11.415
35.3077	6.1364	0.14147	6.3637	4.9064	3.631	1.5864	6.8576	30.298		1.4179	16.453	7.5219	2.8845	2.9439	0.80335	6.7035	1.8004		9.0596	5.973	2.2892	1.4737	2.7245	53.205	6.1642	6.5458		0.78614	1.1158	4.4255	1.7475	1.5197	5.8732	2.0195	12.487		131.47	71.775	76.709	132.76	129.61	55.632	83.423	63.679		4.0134	46.581	7.0043	11.546
35.8269	6.3153	0.13933	6.367	5.0139	3.8671	1.5838	6.7305	29.184		1.4448	17.439	7.5867	2.96	3.1102	0.75839	6.3632	1.8668		8.9089	6.0963	2.33	1.4754	2.5341	53.254	6.1824	6.8057		0.80906	1.0786	4.3225	1.6618	1.5192	5.6749	2.0308	12.495		125.72	72.125	75.006	136.99	119.6	58.259	81.588	59.084		3.7925	45.973	7.2344	11.647
36.3462	6.4854	0.13726	6.3779	5.1124	4.0903	1.5807	6.6136	28.149		1.4744	18.392	7.6156	3.0565	3.2842	0.71727	5.9953	1.962		8.761	6.2875	2.3661	1.4835	2.3582	53.097	6.1967	7.0488		0.83441	1.0394	4.1967	1.5732	1.5202	5.4853	2.0366	12.52		120.47	72.502	73.025	140.95	110.28	60.771	79.783	55.177		3.5537	45.393	7.4382	11.71
36.8654	6.643	0.13528	6.393	5.1972	4.2964	1.5772	6.5093	27.21		1.5065	19.296	7.6087	3.1724	3.4643	0.6806	5.6046	2.0825		8.6133	6.5525	2.3971	1.4972	2.1982	52.735	6.2097	7.2716		0.86183	0.99905	4.0511	1.4832	1.5227	5.3058	2.0372	12.562		115.7	72.891	70.796	144.6	101.73	63.149	78.001	52.016		3.3008	44.846	7.6119	11.73
37.3846	6.7851	0.13344	6.4097	5.2638	4.4814	1.5734	6.4194	26.382		1.5408	20.133	7.5672	3.3056	3.6488	0.64891	5.1961	2.2245		8.4629	6.8963	2.423	1.516	2.0552	52.172	6.2245	7.4712		0.89095	0.95816	3.8888	1.393	1.5265	5.1371	2.0324	12.618		111.37	73.281	68.355	147.86	94.011	65.374	76.233	49.642		3.0378	44.335	7.7522	11.701
37.9039	6.909	0.13175	6.4259	5.3088	4.6417	1.5694	6.3454	25.673		1.5771	20.89	7.4927	3.4533	3.8361	0.62263	4.7754	2.3836		8.3074	7.3221	2.4438	1.5392	1.9303	51.416	6.2437	7.6448		0.9214	0.91759	3.7132	1.304	1.5311	4.9796	2.0225	12.687		107.46	73.665	65.74	150.7	87.159	67.433	74.472	48.076		2.7688	43.861	7.8559	11.622
38.4231	7.0124	0.13025	6.4402	5.3292	4.7744	1.5651	6.2881	25.09		1.6151	21.552	7.3875	3.6127	4.0247	0.60207	4.3479	2.5553		8.1444	7.8313	2.4594	1.566	1.8242	50.478	6.2694	7.7904		0.9528	0.87819	3.5276	1.2174	1.5363	4.833	2.0076	12.764		103.91	74.037	62.992	153.07	81.19	69.311	72.713	47.322		2.4982	43.422	7.9208	11.49
38.9423	7.0936	0.12895	6.4521	5.3232	4.8772	1.5607	6.2477	24.633		1.6543	22.108	7.2546	3.7806	4.2132	0.58748	3.9192	2.7349		7.9722	8.4237	2.47	1.5961	1.7375	49.375	6.3037	7.9064		0.98479	0.84083	3.3356	1.1342	1.5417	4.6967	1.988	12.847		100.67	74.399	60.152	154.94	76.102	70.996	70.951	47.364		2.2302	43.016	7.945	11.305
39.4615	7.1515	0.12787	6.4618	5.2897	4.9483	1.5562	6.2241	24.3		1.6945	22.549	7.0976	3.9534	4.4005	0.57897	3.4949	2.9176		7.7896	9.0969	2.4758	1.629	1.6703	48.121	6.3479	7.9919		1.017	0.80637	3.1406	1.0556	1.5472	4.5699	1.964	12.931		97.705	74.754	57.264	156.26	71.874	72.477	69.185	48.165		1.9691	42.635	7.9273	11.068
39.9808	7.1856	0.12702	6.4704	5.2285	4.9868	1.5516	6.2163	24.083		1.7351	22.869	6.9202	4.1276	4.5855	0.57659	3.0802	3.0987		7.596	9.8467	2.477	1.6643	1.6227	46.738	6.4026	8.0467		1.0491	0.77565	2.946	0.98252	1.5523	4.4515	1.9361	13.011		94.956	75.108	54.369	157.03	68.467	73.745	67.417	49.674		1.7189	42.275	7.8676	10.783
40.5	7.1955	0.12641	6.4795	5.1403	4.9925	1.5471	6.2232	23.972		1.7755	23.065	6.7267	4.2999	4.7678	0.58029	2.6801	3.2736		7.3915	10.667	2.4739	1.7019	1.5946	45.247	6.468	8.0713		1.0809	0.74946	2.7547	0.91571	1.5571	4.3401	1.9046	13.084		92.384	75.469	51.51	157.22	65.828	74.792	65.653	51.822		1.4834	41.925	7.7663	10.454
41.0192	7.1818	0.12604	6.4917	5.0268	4.966	1.5427	6.2431	23.951		1.8153	23.136	6.5216	4.4666	4.9469	0.58997	2.2995	3.4379		7.1769	11.549	2.4669	1.7417	1.5858	43.671	6.5435	8.0668		1.112	0.7285	2.5696	0.85591	1.5614	4.2344	1.8702	13.145		89.954	75.847	48.727	156.84	63.892	75.611	63.9	54.524		1.2662	41.578	7.6249	10.087
41.5385	7.1451	0.1259	6.5097	4.89	4.9084	1.5385	6.2739	24.005		1.8537	23.085	6.3095	4.6247	5.1229	0.60543	1.9427	3.5876		6.9534	12.485	2.4565	1.7838	1.5957	42.035	6.6277	8.0351		1.1423	0.7134	2.3932	0.8037	1.5655	4.133	1.8333	13.192		87.639	76.252	46.057	155.87	62.582	76.197	62.171	57.683		1.0704	41.222	7.4457	9.6875
42.0577	7.0865	0.12599	6.5371	4.7331	4.8219	1.5347	6.3134	24.115		1.8901	22.918	6.0947	4.771	5.2958	0.62644	1.6135	3.7193		6.7231	13.461	2.443	1.8284	1.6237	40.364	6.7189	7.9786		1.1715	0.70467	2.2275	0.75954	1.5695	4.0347	1.7946	13.221		85.422	76.693	43.535	154.35	61.815	76.545	60.477	61.194		0.89885	40.849	7.2323	9.2646
42.5769	7.0076	0.12629	6.5772	4.5594	4.7088	1.5312	6.3592	24.26		1.9238	22.643	5.8816	4.903	5.466	0.6527	1.3155	3.8301		6.4882	14.466	2.4271	1.8757	1.6691	38.684	6.8146	7.9004		1.1997	0.70267	2.0742	0.72378	1.5738	3.9383	1.7548	13.231		83.298	77.176	41.191	152.28	61.504	76.655	58.836	64.944		0.75377	40.447	6.9888	8.8268
43.0962	6.9099	0.12678	6.6339	4.3728	4.5722	1.5283	6.4087	24.419		1.9541	22.272	5.6741	5.0184	5.6341	0.68388	1.0517	3.9177		6.2514	15.486	2.4095	1.9263	1.7311	37.021	6.912	7.8041		1.2266	0.70765	1.9347	0.69663	1.5788	3.8431	1.7145	13.222		81.273	77.708	39.052	149.71	61.56	76.526	57.264	68.816		0.63702	40.008	6.7207	8.3836
43.6154	6.7954	0.12744	6.7109	4.1774	4.4156	1.526	6.4594	24.572		1.9804	21.816	5.476	5.1151	5.8004	0.71964	0.82467	3.9804		6.0156	16.507	2.3907	1.9807	1.8087	35.399	7.008	7.6935		1.2522	0.71971	1.8096	0.67821	1.5849	3.7482	1.6744	13.192		79.364	78.29	37.139	146.66	61.892	76.163	55.78	72.691		0.54995	39.524	6.4342	7.945
44.1346	6.6663	0.12824	6.8118	3.9774	4.2428	1.5244	6.5088	24.699		2.0021	21.292	5.2905	5.1918	5.9655	0.75957	0.63639	4.0174		5.7838	17.513	2.3716	2.0393	1.9008	33.843	7.0992	7.5727		1.2766	0.73876	1.6997	0.66855	1.5927	3.6535	1.6353	13.145		77.597	78.921	35.468	143.18	62.416	75.57	54.402	76.456		0.49339	38.992	6.1363	7.5214
44.6538	6.5247	0.12915	6.9399	3.7771	4.0578	1.5237	6.5547	24.78		2.0187	20.717	5.1204	5.2474	6.1296	0.8033	0.48853	4.0286		5.5589	18.491	2.353	2.103	2.0063	32.373	7.1825	7.4461		1.2998	0.76458	1.6048	0.66757	1.6026	3.5588	1.5978	13.081		76.005	79.595	34.052	139.33	63.051	74.756	53.148	80.002		0.46767	38.407	5.8348	7.1232
45.1731	6.3733	0.13015	7.0979	3.5804	3.8647	1.5238	6.5949	24.8		2.0297	20.107	4.9679	5.2813	6.2928	0.85042	0.38227	4.0146		5.3439	19.426	2.3356	2.1722	2.124	31.01	7.2546	7.3179		1.3218	0.7968	1.5246	0.67513	1.615	3.4642	1.5624	13.004		74.63	80.302	32.898	135.17	63.722	73.733	52.036	83.23		0.4726	37.771	5.5379	6.7606
45.6923	6.2146	0.13119	7.2884	3.3912	3.6676	1.5248	6.6277	24.743		2.035	19.482	4.8349	5.2933	6.4549	0.90051	0.31836	3.9767		5.1412	20.304	2.3204	2.2475	2.2524	29.772	7.3127	7.192		1.3426	0.8349	1.4585	0.691	1.6303	3.3704	1.5299	12.917		73.515	81.03	32.007	130.74	64.366	72.517	51.082	86.053		0.50751	37.089	5.2543	6.4433
46.2115	6.0512	0.13224	7.5129	3.2127	3.4705	1.5269	6.6516	24.598		2.0344	18.859	4.7227	5.2836	6.6152	0.95318	0.29718	3.9169		4.9535	21.112	2.3083	2.3296	2.3902	28.672	7.3545	7.0723		1.3625	0.87822	1.4055	0.71493	1.6485	3.2778	1.5006	12.824		72.708	81.762	31.378	126.1	64.925	71.125	50.299	88.399		0.57123	36.369	4.9926	6.1806
46.7308	5.8858	0.13328	7.7726	3.0479	3.2771	1.53	6.6657	24.355		2.028	18.257	4.6324	5.2528	6.7727	1.008	0.31871	3.8377		4.7828	21.84	2.3002	2.4188	2.5357	27.722	7.3781	6.962		1.3814	0.92597	1.3643	0.74657	1.6698	3.1875	1.4751	12.73		72.255	82.477	31.003	121.32	65.354	69.576	49.699	90.211		0.66215	35.625	4.7616	5.9807
47.25	5.7213	0.13428	8.0677	2.8991	3.0909	1.5341	6.6693	24.01		2.016	17.692	4.5645	5.2017	6.9259	1.0646	0.38258	3.742		4.631	22.476	2.2969	2.5154	2.6873	26.931	7.3824	6.8639		1.3995	0.97728	1.3335	0.78557	1.6939	3.1004	1.4536	12.637		72.2	83.151	30.872	116.45	65.616	67.895	49.292	91.452		0.77825	34.875	4.5696	5.8507
47.7692	5.5603	0.13519	8.3974	2.7681	2.9151	1.5393	6.6624	23.558		1.999	17.179	4.5193	5.1317	7.073	1.1226	0.48807	3.6333		4.4997	23.012	2.2992	2.6197	2.8433	26.302	7.3669	6.7798		1.4168	1.0312	1.3114	0.83155	1.7208	3.0177	1.4364	12.551		72.584	83.759	30.971	111.55	65.687	66.103	49.082	92.1		0.91709	34.14	4.4247	5.7965
48.2885	5.4053	0.13602	8.7603	2.6559	2.7521	1.5454	6.6455	23.001		1.9773	16.734	4.4968	5.0443	7.2118	1.1815	0.63414	3.515		4.3902	23.442	2.308	2.7316	3.0018	25.837	7.3318	6.7112		1.4333	1.0866	1.2963	0.88407	1.7498	2.9403	1.4236	12.473		73.439	84.272	31.282	106.65	65.55	64.228	49.072	92.153		1.0759	33.446	4.3339	5.8224
48.8077	5.259	0.13672	9.154	2.563	2.6043	1.5524	6.6194	22.342		1.9518	16.367	4.4969	4.9412	7.3397	1.2409	0.81943	3.391		4.3036	23.759	2.3238	2.8508	3.1609	25.532	7.2781	6.6584		1.449	1.1426	1.2863	0.94273	1.7805	2.8694	1.4154	12.407		74.792	84.66	31.785	101.8	65.196	62.293	49.263	91.629		1.2517	32.823	4.3039	5.9309
49.3269	5.1234	0.13729	9.5752	2.4894	2.473	1.5603	6.5855	21.587		1.9232	16.088	4.5192	4.8245	7.4538	1.3003	1.0423	3.2649		4.241	23.959	2.3473	2.977	3.3187	25.382	7.2076	6.6211		1.4638	1.198	1.2796	1.0071	1.812	2.8059	1.4117	12.355		76.66	84.894	32.46	97.041	64.626	60.324	49.651	90.562		1.441	32.3	4.3399	6.1227
49.8462	5.0007	0.13772	10.02	2.4342	2.3595	1.5689	6.546	20.744		1.8925	15.904	4.5631	4.6965	7.5512	1.3594	1.3007	3.1404		4.2029	24.041	2.3789	3.1095	3.4734	25.376	7.1224	6.598		1.4777	1.2517	1.2745	1.0766	1.8436	2.7508	1.4124	12.316		79.05	84.943	33.282	92.406	63.845	58.345	50.23	89		1.6404	31.912	4.4465	6.3966
50.3654	4.8923	0.138	10.483	2.3962	2.2642	1.5782	6.5029	19.824		1.8605	15.819	4.628	4.5595	7.6289	1.4174	1.5924	3.021		4.1903	24.004	2.419	3.2474	3.6231	25.503	7.0252	6.5872		1.4906	1.3028	1.2693	1.151	1.8745	2.7045	1.4175	12.292		81.955	84.778	34.228	87.919	62.868	56.378	50.993	87.008		1.8463	31.691	4.6267	6.7495
50.8846	4.7997	0.13812	10.96	2.3736	2.1871	1.5879	6.4591	18.838		1.8282	15.836	4.7129	4.4163	7.6841	1.474	1.9149	2.9098		4.2037	23.85	2.4677	3.3897	3.7659	25.746	6.9192	6.586		1.5021	1.3503	1.2623	1.2297	1.9036	2.6677	1.4267	12.28		85.359	84.372	35.272	83.603	61.708	54.444	51.928	84.66		2.0549	31.669	4.8823	7.1759
51.4038	4.7239	0.13811	11.445	2.3644	2.1276	1.598	6.4174	17.799		1.7967	15.952	4.8168	4.2694	7.714	1.5285	2.2654	2.8098		4.2441	23.582	2.525	3.535	3.9003	26.087	6.8076	6.5915		1.5121	1.3933	1.2524	1.3123	1.9301	2.6405	1.44	12.28		89.23	83.702	36.392	79.477	60.386	52.56	53.024	82.042		2.2625	31.875	5.2139	7.6687
51.9231	4.6654	0.13795	11.93	2.3661	2.0848	1.6084	6.3808	16.723		1.7666	16.164	4.9383	4.1217	7.7165	1.5803	2.6407	2.7234		4.312	23.206	2.5908	3.6821	4.0247	26.506	6.6938	6.5999		1.5202	1.4311	1.2383	1.3983	1.953	2.6227	1.457	12.288		93.521	82.749	37.562	75.556	58.924	50.74	54.267	79.243		2.4655	32.336	5.6204	8.2188
52.4423	4.6244	0.13766	12.411	2.3761	2.0571	1.6187	6.3523	15.622		1.7389	16.466	5.0759	3.9759	7.6897	1.6288	3.0376	2.6528		4.4085	22.727	2.6646	3.8292	4.1378	26.981	6.581	6.6076		1.5263	1.4631	1.2193	1.4873	1.9715	2.6141	1.4777	12.302		98.175	81.498	38.761	71.852	57.343	48.998	55.642	76.356		2.6603	33.075	6.0996	8.8154
52.9615	4.6011	0.13726	12.881	2.3918	2.0427	1.629	6.3347	14.512		1.7143	16.849	5.2279	3.8348	7.6323	1.6733	3.4526	2.5998		4.5345	22.156	2.7459	3.9747	4.2385	27.489	6.4722	6.6108		1.5298	1.4889	1.1947	1.5788	1.9849	2.614	1.5019	12.318		103.12	79.942	39.967	68.376	55.668	47.342	57.134	73.476		2.8436	34.107	6.6475	9.4463
53.4808	4.5949	0.13676	13.333	2.4105	2.0396	1.6391	6.3308	13.406		1.6935	17.304	5.3923	3.7011	7.5436	1.7134	3.8819	2.5656		4.6909	21.501	2.8339	4.1168	4.3259	28.006	6.3702	6.6058		1.5305	1.508	1.1642	1.6723	1.9926	2.6216	1.5292	12.333		108.26	78.081	41.161	65.134	53.921	45.779	58.725	70.694		3.0123	35.445	7.259	10.098
54	4.6053	0.13618	13.762	2.4298	2.0454	1.6488	6.3428	12.319		1.6769	17.818	5.5667	3.5773	7.4237	1.7483	4.3218	2.5513		4.8789	20.775	2.9277	4.2537	4.3995	28.508	6.2771	6.5893		1.5281	1.5205	1.128	1.7674	1.9939	2.6357	1.5595	12.343		113.51	75.923	42.323	62.132	52.126	44.31	60.4	68.095		3.1638	37.092	7.9274	10.757
54.5192	4.6314	0.13554	14.162	2.4475	2.0576	1.658	6.3726	11.263		1.665	18.379	5.7486	3.4659	7.273	1.7775	4.7682	2.5575		5.0993	19.99	3.026	4.3835	4.4589	28.975	6.1947	6.5584		1.5223	1.5263	1.0862	1.8636	1.9887	2.655	1.5925	12.346		118.76	73.484	43.437	59.373	50.303	42.938	62.144	65.759		3.2955	39.047	8.6447	11.407
55.0385	4.6722	0.13486	14.528	2.462	2.0738	1.6666	6.4217	10.249		1.658	18.975	5.9354	3.3691	7.0929	1.8007	5.2173	2.5845		5.3532	19.16	3.1276	4.5043	4.504	29.382	6.1241	6.5105		1.5128	1.5257	1.0396	1.9603	1.9767	2.6781	1.6281	12.338		123.89	70.788	44.488	56.86	48.474	41.66	63.94	63.754		3.4055	41.3	9.4016	12.035
55.5577	4.7264	0.13415	14.856	2.472	2.0915	1.6746	6.491	9.2894		1.6563	19.594	6.124	3.289	6.8852	1.8175	5.665	2.6324		5.6412	18.298	3.2311	4.6144	4.5352	29.713	6.0657	6.444		1.4996	1.519	0.98911	2.0571	1.958	2.7033	1.6658	12.319		128.78	67.865	45.461	54.591	46.658	40.471	65.773	62.137		3.4924	43.836	10.188	12.626
56.0769	4.7929	0.13343	15.142	2.4771	2.1084	1.6817	6.5807	8.3918		1.6598	20.222	6.3115	3.2272	6.6521	1.8277	6.1074	2.7011		5.9639	17.419	3.3349	4.712	4.5531	29.948	6.0193	6.3579		1.4824	1.5069	0.93583	2.1534	1.9327	2.7289	1.7053	12.287		133.31	64.754	46.345	52.562	44.875	39.365	67.63	60.956		3.555	46.632	10.992	13.168
56.5962	4.8701	0.13271	15.383	2.4775	2.1226	1.6881	6.6905	7.564		1.6686	20.851	6.4949	3.1852	6.3967	1.8311	6.5406	2.7904		6.3214	16.535	3.4374	4.7956	4.5584	30.073	5.9843	6.2518		1.4614	1.4899	0.88119	2.2486	1.9011	2.7532	1.7462	12.242		137.37	61.5	47.13	50.77	43.143	38.334	69.498	60.242		3.5929	49.661	11.802	13.647
57.1154	4.9566	0.13201	15.578	2.4744	2.1322	1.6936	6.8194	6.812		1.6827	21.472	6.6709	3.1641	6.1221	1.8279	6.9611	2.9		6.7135	15.661	3.5369	4.8639	4.5522	30.078	5.9592	6.1261		1.4366	1.4689	0.82682	2.3422	1.8637	2.7747	1.788	12.186		140.85	58.149	47.806	49.205	41.48	37.367	71.362	60.015		3.606	52.888	12.604	14.054
57.6346	5.0508	0.13132	15.725	2.4695	2.1361	1.6982	6.9658	6.1399		1.7017	22.077	6.8367	3.1648	5.832	1.8182	7.3653	3.0294		7.1396	14.808	3.632	4.9159	4.5359	29.955	5.9423	5.9821		1.4081	1.4446	0.77449	2.4335	1.821	2.7916	1.8301	12.119		143.64	54.753	48.368	47.859	39.905	36.453	73.212	60.28		3.5948	56.275	13.385	14.381
58.1538	5.151	0.13066	15.823	2.4659	2.1332	1.702	7.1275	5.5505		1.7255	22.663	6.9894	3.1877	5.5303	1.8024	7.75	3.1782		7.5983	13.988	3.721	4.9508	4.511	29.699	5.9313	5.8215		1.3764	1.418	0.72612	2.522	1.7739	2.8027	1.8719	12.046		145.66	51.362	48.813	46.721	38.435	35.58	75.034	61.03		3.5601	59.78	14.133	14.621
58.6731	5.2556	0.13002	15.873	2.467	2.1233	1.7049	7.3013	5.0445		1.7536	23.229	7.1264	3.233	5.221	1.7808	8.1121	3.3461		8.088	13.209	3.8026	4.9681	4.4793	29.31	5.9236	5.6468		1.3416	1.39	0.68369	2.607	1.723	2.8068	1.9126	11.969		146.84	48.028	49.142	45.777	37.089	34.736	76.816	62.246		3.5033	63.356	14.832	14.772
59.1923	5.3629	0.1294	15.877	2.4774	2.1064	1.7071	7.4839	4.6215		1.7857	23.775	7.2455	3.3006	4.9082	1.7541	8.449	3.5327		8.6062	12.481	3.8754	4.9679	4.4426	28.791	5.9167	5.4609		1.3042	1.3615	0.64921	2.6878	1.6693	2.8029	1.9514	11.893		147.13	44.8	49.357	45.015	35.885	33.907	78.545	63.896		3.4261	66.955	15.47	14.833
59.7115	5.4712	0.1288	15.836	2.5021	2.0833	1.7085	7.6711	4.2792		1.8212	24.306	7.3448	3.3898	4.5959	1.7227	8.7581	3.7377		9.1498	11.809	3.9383	4.9504	4.4028	28.15	5.9076	5.2671		1.2648	1.3333	0.62468	2.764	1.6135	2.7904	1.9876	11.821		146.49	41.719	49.467	44.422	34.841	33.08	80.21	65.939		3.3305	70.527	16.034	14.805
60.2308	5.579	0.12821	15.754	2.5468	2.0549	1.7093	7.8584	4.0143		1.8595	24.827	7.4229	3.5	4.2883	1.6875	9.0374	3.9609		9.7151	11.199	3.9903	4.9163	4.3617	27.396	5.8938	5.0691		1.2237	1.3064	0.61202	2.8348	1.5566	2.7688	2.0203	11.757		144.93	38.827	49.484	43.984	33.978	32.243	81.799	68.324		3.2188	74.021	16.512	14.694
60.75	5.6845	0.12762	15.634	2.6175	2.0228	1.7095	8.041	3.8222		1.9	25.345	7.4787	3.6298	3.9891	1.6492	9.2849	4.2019		10.298	10.654	4.0307	4.8668	4.3213	26.542	5.8728	4.8706		1.1815	1.2814	0.61302	2.8997	1.4994	2.7382	2.0487	11.707		142.45	36.154	49.424	43.689	33.314	31.385	83.301	70.992		3.0936	77.385	16.894	14.505
61.2692	5.7865	0.12703	15.479	2.7204	1.989	1.7093	8.2138	3.6972		1.9422	25.872	7.5118	3.7779	3.702	1.6084	9.4992	4.4607		10.892	10.177	4.0588	4.8031	4.2832	25.604	5.8424	4.6756		1.1388	1.2591	0.62928	2.9581	1.4428	2.6987	2.072	11.673		139.09	33.725	49.308	43.526	32.87	30.497	84.707	73.88		2.9575	80.569	17.171	14.248
61.7885	5.8833	0.12643	15.296	2.8618	1.9557	1.7088	8.3718	3.6328		1.9853	26.416	7.522	3.9425	3.4301	1.5659	9.6787	4.7368		11.493	9.7661	4.0742	4.7269	4.249	24.599	5.8007	4.4877		1.0959	1.2398	0.6622	3.0094	1.3876	2.6506	2.0895	11.659		134.9	31.557	49.162	43.485	32.666	29.568	86.009	76.918		2.8135	83.522	17.334	13.934
62.3077	5.9738	0.12581	15.087	3.0477	1.9254	1.7081	8.5098	3.6221		2.0287	26.991	7.5099	4.1213	3.1764	1.5223	9.8226	5.0299		12.094	9.4222	4.0768	4.64	4.22	23.548	5.7465	4.3105		1.0533	1.2242	0.71289	3.0532	1.3346	2.5947	2.1005	11.666		129.96	29.658	49.017	43.558	32.723	28.594	87.205	80.035		2.6644	86.196	17.379	13.574
62.8269	6.0567	0.12519	14.858	3.2838	1.9006	1.7074	8.6234	3.6574		2.0719	27.607	7.476	4.3119	2.9435	1.4783	9.93	5.3395		12.689	9.1428	4.0665	4.5443	4.1972	22.469	5.6788	4.1475		1.0114	1.2125	0.78218	3.089	1.2843	2.5317	2.1046	11.698		124.35	28.03	48.905	43.741	33.062	27.571	88.292	83.158		2.5131	88.546	17.303	13.182
63.3462	6.1309	0.12455	14.612	3.5751	1.884	1.7067	8.708	3.7311		2.1142	28.275	7.4217	4.5116	2.7332	1.4344	10	5.6649		13.27	8.9253	4.0432	4.4421	4.1811	21.385	5.5974	4.0017		0.97057	1.2049	0.87055	3.1163	1.2373	2.4626	2.1014	11.754		118.18	26.664	48.862	44.031	33.702	26.497	89.277	86.213		2.3624	90.53	17.104	12.771
63.8654	6.1956	0.12392	14.354	3.926	1.8781	1.7063	8.7602	3.8353		2.1552	29.007	7.3483	4.7172	2.5472	1.391	10.033	6.0052		13.83	8.7663	4.0073	4.3354	4.1722	20.317	5.5024	3.8755		0.93106	1.2015	0.97814	3.1348	1.1942	2.3883	2.0908	11.833		111.54	25.546	48.93	44.428	34.665	25.373	90.167	89.13		2.2152	92.109	16.786	12.354
64.3846	6.2497	0.12329	14.088	4.3398	1.8855	1.7061	8.7769	3.9624		2.1944	29.81	7.2577	4.9255	2.3866	1.3485	10.029	6.3593		14.364	8.6622	3.959	4.2263	4.1702	19.283	5.3944	3.7713		0.89309	1.2024	1.1047	3.1443	1.1552	2.3099	2.0727	11.936		104.55	24.655	49.147	44.935	35.967	24.205	90.978	91.839		2.0741	93.251	16.351	11.946
64.9039	6.2926	0.12269	13.817	4.8188	1.9081	1.7064	8.7561	4.105		2.2314	30.693	7.1517	5.1327	2.2518	1.3071	9.9878	6.7258		14.862	8.609	3.8989	4.1168	4.1746	18.305	5.2745	3.6906		0.8568	1.2073	1.2497	3.1445	1.1206	2.2285	2.0475	12.06		97.332	23.965	49.555	45.559	37.625	22.998	91.73	94.276		1.9415	93.928	15.807	11.559
65.4231	6.3236	0.12212	13.542	5.3641	1.948	1.7071	8.6964	4.2561		2.2661	31.659	7.0327	5.3353	2.1429	1.267	9.9099	7.1028		15.32	8.6028	3.8273	4.0088	4.1845	17.399	5.1438	3.6347		0.82229	1.2161	1.4122	3.1355	1.0905	2.145	2.0156	12.202		89.983	23.445	50.194	46.31	39.653	21.761	92.449	96.382		1.8197	94.121	15.164	11.204
65.9423	6.3422	0.12162	13.267	5.9755	2.0065	1.7084	8.5975	4.4092		2.298	32.711	6.9028	5.5293	2.0595	1.2282	9.7961	7.4882		15.731	8.6401	3.745	3.904	4.1986	16.583	5.0042	3.6041		0.7896	1.2284	1.5908	3.1171	1.0651	2.0605	1.9776	12.359		82.616	23.064	51.103	47.201	42.061	20.507	93.165	98.104		1.7108	93.815	14.435	10.893
66.4615	6.3479	0.1212	12.992	6.6514	2.0846	1.7102	8.46	4.5585		2.3271	33.849	6.7644	5.7108	2.0005	1.1908	9.6477	7.8796		16.091	8.7174	3.6525	3.8037	4.2154	15.869	4.8572	3.599		0.75876	1.244	1.784	3.0897	1.0441	1.9758	1.9343	12.528		75.332	22.786	52.314	48.248	44.854	19.247	93.914	99.398		1.6165	93.008	13.632	10.634
66.9808	6.3404	0.12087	12.718	7.3889	2.1829	1.7127	8.2853	4.6989		2.3533	35.069	6.6202	5.876	1.9648	1.1547	9.466	8.274		16.393	8.8316	3.5509	3.7091	4.2329	15.27	4.7048	3.6191		0.72974	1.2623	1.9896	3.0534	1.0275	1.8918	1.8866	12.705		68.225	22.576	53.858	49.469	48.033	17.997	94.734	100.22		1.5385	91.702	12.773	10.435
67.5	6.3197	0.12067	12.446	8.1836	2.3013	1.7156	8.0755	4.8259		2.3764	36.364	6.4725	6.0212	1.9505	1.1196	9.2527	8.6683		16.636	8.9798	3.4408	3.6213	4.2491	14.794	4.5489	3.6635		0.70252	1.283	2.2057	3.0086	1.0151	1.8092	1.8358	12.887		61.377	22.401	55.756	50.886	51.593	16.771	95.665	100.56		1.4779	89.911	11.873	10.302
68.0192	6.2859	0.1206	12.175	9.0299	2.4392	1.719	7.8337	4.936		2.3966	37.723	6.3237	6.1429	1.9556	1.0855	9.01	9.0589		16.817	9.1595	3.3232	3.5408	4.2622	14.448	4.3915	3.7311		0.67707	1.3053	2.4295	2.9559	1.0066	1.7286	1.7829	13.07		54.862	22.229	58.021	52.52	55.521	15.586	96.749	100.38		1.4359	87.656	10.952	10.237
68.5385	6.2394	0.12069	11.906	9.9208	2.5956	1.7227	7.5632	5.0263		2.4137	39.135	6.1761	6.2382	1.9779	1.0522	8.7405	9.4422		16.934	9.368	3.1993	3.4678	4.2699	14.236	4.2344	3.8202		0.65337	1.3289	2.6586	2.8958	1.0016	1.6507	1.7292	13.25		48.741	22.033	60.656	54.393	59.799	14.456	98.024	99.679		1.4132	84.969	10.027	10.244
69.0577	6.1807	0.12093	11.639	10.848	2.7688	1.7267	7.2682	5.0948		2.4279	40.584	6.0319	6.3045	2.0148	1.0195	8.447	9.814		16.987	9.6029	3.0701	3.4025	4.2704	14.159	4.0796	3.9288		0.63141	1.3531	2.8901	2.8291	0.99983	1.5759	1.6761	13.426		43.063	21.787	63.654	56.529	64.4	13.399	99.528	98.461		1.4104	81.888	9.1181	10.322
69.5769	6.1108	0.12135	11.375	11.804	2.9567	1.7308	6.9531	5.1403		2.4393	42.05	5.8929	6.3399	2.0636	0.98713	8.1328	10.17		16.977	9.8615	2.9367	3.3445	4.2619	14.217	3.9287	4.0548		0.61123	1.3773	3.1209	2.7565	1.0008	1.5047	1.6247	13.596		37.867	21.472	66.995	58.947	69.291	12.428	101.29	96.737		1.4276	78.458	8.2425	10.469
70.0962	6.0308	0.12193	11.112	12.777	3.1569	1.7349	6.6227	5.1623		2.4479	43.514	5.7609	6.3431	2.1216	0.95508	7.8017	10.507		16.906	10.141	2.8005	3.2932	4.2431	14.404	3.7837	4.1957		0.59287	1.401	3.3482	2.6788	1.0042	1.4374	1.5764	13.757		33.178	21.073	70.645	61.665	74.429	11.557	103.35	94.531		1.4648	74.731	7.4175	10.681
70.6154	5.9423	0.12267	10.853	13.758	3.3665	1.7387	6.2819	5.1611		2.4538	44.955	5.6371	6.3136	2.186	0.9232	7.4578	10.82		16.776	10.437	2.6627	3.2479	4.2129	14.717	3.6461	4.3489		0.5764	1.4236	3.5688	2.5971	1.0094	1.3743	1.5322	13.909		29.01	20.581	74.56	64.697	79.767	10.798	105.71	91.875		1.5219	70.763	6.6593	10.953
71.1346	5.8468	0.12356	10.597	14.735	3.5824	1.7422	5.9357	5.1378		2.4573	46.349	5.5227	6.2517	2.254	0.89146	7.1054	11.105		16.592	10.746	2.5246	3.2076	4.1707	15.148	3.5175	4.512		0.56193	1.4448	3.7798	2.5121	1.0162	1.3156	1.4933	14.052		25.368	19.991	78.68	68.051	85.25	10.161	108.39	88.814		1.5984	66.614	5.982	11.278
71.6539	5.7464	0.1246	10.347	15.699	3.8014	1.7451	5.5895	5.0941		2.4585	47.673	5.4184	6.1583	2.3228	0.85987	6.7494	11.358		16.358	11.064	2.3876	3.1709	4.1163	15.687	3.3995	4.6822		0.54959	1.464	3.9783	2.4249	1.024	1.2616	1.4606	14.187		22.246	19.305	82.938	71.73	90.816	9.6544	111.39	85.398		1.6935	62.346	5.3981	11.649
72.1731	5.6432	0.12574	10.104	16.639	4.0202	1.7472	5.2481	5.0322		2.4575	48.903	5.3245	6.0351	2.3899	0.82853	6.3949	11.577		16.079	11.386	2.2529	3.1367	4.0499	16.324	3.2935	4.8572		0.53952	1.481	4.1615	2.3365	1.0324	1.2123	1.4349	14.314		19.628	18.529	87.253	75.73	96.399	9.2856	114.71	81.69		1.8063	58.019	4.9179	12.056
72.6923	5.5394	0.12699	9.8687	17.544	4.2356	1.7485	4.9166	4.9548		2.4545	50.017	5.2413	5.8844	2.4528	0.79761	6.047	11.757		15.761	11.707	2.1218	3.1036	3.9722	17.045	3.2011	5.0348		0.5319	1.4956	4.3269	2.2477	1.041	1.1677	1.4167	14.434		17.495	17.673	91.537	80.04	101.93	9.0583	118.33	77.757		1.9357	53.697	4.5492	12.49
73.2115	5.4372	0.12829	9.6443	18.406	4.4445	1.7489	4.5996	4.8653		2.4498	50.993	5.1685	5.7092	2.5093	0.76737	5.7111	11.896		15.411	12.02	1.9955	3.0703	3.8844	17.838	3.1237	5.2129		0.52688	1.5075	4.472	2.1596	1.0494	1.128	1.4066	14.548		15.819	16.752	95.697	84.64	107.34	8.9745	122.21	73.673		2.0801	49.438	4.2975	12.939
73.7308	5.339	0.12964	9.432	19.216	4.6442	1.748	4.3014	4.7672		2.4433	51.812	5.1058	5.5129	2.5572	0.73812	5.3924	11.992		15.033	12.32	1.8751	3.0354	3.7879	18.687	3.0625	5.3901		0.52465	1.5168	4.5948	2.073	1.0572	1.0931	1.4048	14.658		14.567	15.784	99.636	89.505	112.54	9.0339	126.34	69.518		2.2382	45.3	4.1656	13.394
74.25	5.2468	0.13099	9.2338	19.967	4.832	1.746	4.0261	4.6643		2.4353	52.455	5.0527	5.299	2.595	0.71029	5.0962	12.043		14.636	12.601	1.7617	2.9979	3.6844	19.576	3.019	5.5652		0.52537	1.5235	4.6937	1.9889	1.0641	1.0629	1.4114	14.765		13.706	14.79	103.25	94.6	117.48	9.234	130.66	65.374		2.4079	41.335	4.1535	13.843
74.7692	5.1628	0.13231	9.0511	20.653	5.006	1.7427	3.7771	4.5608		2.4259	52.906	5.0083	5.0716	2.621	0.68434	4.8275	12.05		14.223	12.857	1.6562	2.9566	3.5759	20.488	2.9944	5.7378		0.52919	1.5278	4.7671	1.9079	1.0696	1.0374	1.4264	14.87		13.198	13.792	106.46	99.887	122.07	9.5698	135.13	61.325		2.5873	37.592	4.259	14.275
75.2885	5.0887	0.13357	8.8855	21.27	5.1645	1.738	3.5573	4.4608		2.4151	53.152	4.9718	4.8348	2.6341	0.66082	4.5908	12.011		13.802	13.082	1.5592	2.9108	3.4645	21.406	2.9897	5.9078		0.53622	1.5298	4.8142	1.831	1.0735	1.0165	1.4494	14.972		13.008	12.814	109.15	105.32	126.24	10.034	139.69	57.456		2.7742	34.115	4.477	14.68
75.8077	5.0262	0.13474	8.7379	21.815	5.3064	1.732	3.3692	4.3685		2.403	53.184	4.9422	4.5926	2.6336	0.64035	4.3902	11.929		13.378	13.274	1.4714	2.8598	3.3525	22.313	3.006	6.076		0.54656	1.5298	4.8342	1.7588	1.0755	0.99999	1.4799	15.072		13.099	11.88	111.26	110.84	129.94	10.619	144.3	53.848		2.9663	30.941	4.8001	15.049
76.3269	4.9767	0.1358	8.6091	22.286	5.4309	1.7247	3.2143	4.2881		2.3895	52.993	4.9186	4.3491	2.619	0.62356	4.2292	11.804		12.954	13.426	1.3932	2.8033	3.2419	23.19	3.0442	6.2434		0.56024	1.5282	4.8271	1.6921	1.0754	0.98781	1.5174	15.168		13.437	11.015	112.71	116.41	133.1	11.313	148.88	50.579		3.161	28.102	5.2189	15.371
76.8462	4.9411	0.13673	8.4995	22.683	5.538	1.716	3.0938	4.2237		2.3745	52.576	4.9001	4.1081	2.5901	0.61116	4.1104	11.639		12.536	13.537	1.325	2.7413	3.1349	24.021	3.1049	6.412		0.57725	1.5254	4.793	1.6314	1.0728	0.97982	1.561	15.261		13.991	10.242	113.44	121.96	135.67	12.103	153.39	47.723		3.3559	25.624	5.7216	15.641
77.3654	4.9204	0.13749	8.409	23.008	5.6279	1.706	3.008	4.1791		2.3581	51.934	4.8857	3.8732	2.5473	0.60386	4.0357	11.438		12.126	13.605	1.2666	2.6739	3.0335	24.788	3.1885	6.5841		0.59751	1.5215	4.7327	1.5773	1.0677	0.97587	1.6098	15.347		14.734	9.5834	113.42	127.45	137.62	12.977	157.79	45.345		3.5482	23.524	6.295	15.851
77.8846	4.9149	0.13808	8.3374	23.262	5.7011	1.6948	2.9567	4.1578		2.3399	51.069	4.8745	3.6476	2.4911	0.6024	4.0061	11.204		11.728	13.629	1.2182	2.6015	2.9392	25.477	3.2952	6.7621		0.62089	1.5172	4.6473	1.5304	1.06	0.97585	1.6627	15.426		15.641	9.0582	112.63	132.81	138.91	13.919	162.01	43.503		3.7355	21.816	6.9244	15.997
78.4038	4.9248	0.13848	8.2837	23.448	5.7586	1.6824	2.9389	4.1631		2.3198	49.989	4.8659	3.4343	2.4225	0.60752	4.0215	10.941		11.344	13.61	1.1794	2.5249	2.8537	26.073	3.425	6.9491		0.64717	1.5126	4.5383	1.491	1.0496	0.97963	1.7187	15.495		16.692	8.684	111.07	137.99	139.52	14.913	166.03	42.244		3.9149	20.503	7.594	16.076
78.9231	4.9499	0.1387	8.247	23.57	5.8015	1.669	2.9532	4.1977		2.2976	48.705	4.8592	3.2357	2.3427	0.61994	4.0809	10.656		10.977	13.551	1.1499	2.4449	2.7779	26.564	3.5772	7.1478		0.67604	1.508	4.4075	1.4595	1.0365	0.98709	1.7763	15.551		17.872	8.4753	108.77	142.95	139.45	15.944	169.81	41.607		4.0841	19.585	8.287	16.088
79.4423	4.9897	0.13872	8.226	23.631	5.831	1.6547	2.9976	4.264		2.2732	47.23	4.8541	3.054	2.2532	0.64035	4.1823	10.353		10.627	13.454	1.1291	2.3625	2.713	26.94	3.7512	7.361		0.70716	1.5039	4.257	1.4362	1.0208	0.99815	1.8344	15.592		19.168	8.4431	105.76	147.64	138.71	16.997	173.31	41.614		4.2405	19.051	8.9866	16.034
79.9615	5.0434	0.13856	8.2192	23.635	5.8483	1.6395	3.0699	4.3634		2.2462	45.583	4.8501	2.8909	2.1557	0.66941	4.3226	10.036		10.297	13.325	1.1165	2.2791	2.6593	27.192	3.9456	7.5912		0.74006	1.5002	4.0894	1.4211	1.0026	1.0127	1.8917	15.616		20.573	8.5948	102.11	152.03	137.29	18.053	176.52	42.281		4.3821	18.888	9.6758	15.918
80.4808	5.1099	0.13822	8.225	23.585	5.8547	1.6236	3.1672	4.4971		2.2167	43.783	4.8472	2.7477	2.0522	0.70769	4.4979	9.7129		9.9869	13.167	1.1112	2.1958	2.6172	27.317	4.1587	7.8401		0.77424	1.4973	3.9073	1.4144	0.98207	1.0306	1.9467	15.62		22.083	8.9342	97.915	156.09	135.24	19.1	179.41	43.605		4.5067	19.074	10.338	15.744
81	5.188	0.13772	8.2418	23.482	5.8512	1.6072	3.2865	4.6652		2.1843	41.852	4.8453	2.6255	1.9446	0.75572	4.7033	9.3872		9.699	12.987	1.1126	2.114	2.5866	27.311	4.3884	8.1091		0.80912	1.4952	3.7134	1.4158	0.95953	1.0518	1.9983	15.604		23.694	9.461	93.265	159.77	132.59	20.122	181.95	45.575		4.6126	19.583	10.957	15.519
81.5192	5.276	0.13707	8.268	23.33	5.8386	1.5904	3.4246	4.8674		2.1491	39.813	4.8444	2.5248	1.8352	0.8139	4.9332	9.0643		9.4343	12.789	1.1198	2.0349	2.5672	27.175	4.6321	8.3985		0.84407	1.4939	3.5106	1.4252	0.93525	1.0762	2.0453	15.566		25.409	10.171	88.28	163.08	129.38	21.106	184.14	48.161		4.6983	20.382	11.519	15.25
82.0385	5.3722	0.1363	8.3021	23.128	5.8176	1.5734	3.5783	5.1023		2.1111	37.691	4.8446	2.446	1.7262	0.88257	5.1814	8.7486		9.1942	12.581	1.132	1.9598	2.5587	26.912	4.887	8.7079		0.87844	1.4935	3.3018	1.4422	0.90958	1.1036	2.0864	15.505		27.227	11.057	83.085	165.98	125.67	22.04	185.94	51.326		4.7627	21.436	12.008	14.947
82.5577	5.4749	0.13542	8.3431	22.877	5.7886	1.5562	3.7441	5.3679		2.0703	35.511	4.846	2.3891	1.6198	0.96192	5.441	8.444		8.98	12.368	1.1482	1.8897	2.5603	26.529	5.1495	9.0357		0.91152	1.4937	3.0898	1.4662	0.88293	1.134	2.1208	15.423		29.152	12.107	77.814	168.46	121.51	22.914	187.35	55.015		4.8051	22.706	12.415	14.619
83.0769	5.5821	0.13447	8.3901	22.578	5.7517	1.5391	3.9188	5.6614		2.0269	33.298	4.8487	2.3541	1.518	1.052	5.7048	8.1538		8.7934	12.155	1.1676	1.8255	2.5713	26.034	5.4161	9.3795		0.94264	1.4945	2.8773	1.4968	0.85571	1.167	2.1476	15.32		31.186	13.305	72.602	170.51	116.98	23.718	188.33	59.166		4.8252	24.148	12.728	14.276
83.5962	5.6917	0.13347	8.4424	22.228	5.707	1.5222	4.099	5.9794		1.9811	31.077	4.8526	2.3404	1.423	1.1528	5.9656	7.8809		8.6356	11.946	1.1895	1.7681	2.5909	25.438	5.6828	9.7358		0.97113	1.4956	2.6669	1.5331	0.82841	1.2024	2.1661	15.199		33.328	14.633	67.588	172.13	112.13	24.446	188.86	63.703		4.823	25.719	12.939	13.926
84.1154	5.8018	0.13244	8.4999	21.829	5.6541	1.5056	4.2816	6.3176		1.9331	28.871	4.8577	2.3476	1.3366	1.2641	6.2159	7.627		8.508	11.746	1.213	1.7178	2.6184	24.752	5.9455	10.1		0.99635	1.4969	2.4609	1.5743	0.8015	1.2401	2.1758	15.061		35.578	16.07	62.905	173.31	107.05	25.092	188.93	68.543		4.7991	27.374	13.041	13.578
84.6346	5.9104	0.13142	8.5627	21.378	5.5926	1.4896	4.4637	6.6712		1.8834	26.704	4.8634	2.3748	1.2605	1.3854	6.4486	7.3937		8.4119	11.559	1.2373	1.6751	2.6528	23.991	6.1998	10.468		1.0177	1.498	2.2614	1.6197	0.77548	1.2796	2.1764	14.911		37.93	17.593	58.682	174.04	101.81	25.651	188.51	73.594		4.7546	29.069	13.032	13.241
85.1539	6.0155	0.13043	8.6314	20.876	5.5221	1.4742	4.6425	7.0349		1.8323	24.595	4.8694	2.4213	1.1963	1.5164	6.6569	7.1816		8.348	11.387	1.2619	1.6399	2.6935	23.17	6.4416	10.833		1.0347	1.4986	2.0703	1.6683	0.75085	1.3208	2.1677	14.751		40.375	19.175	55.037	174.32	96.488	26.122	187.59	78.76		4.6909	30.758	12.908	12.92
85.6731	6.1151	0.1295	8.7066	20.323	5.4421	1.4596	4.8153	7.4031		1.7804	22.566	4.8746	2.486	1.1452	1.6563	6.8344	6.9907		8.3172	11.231	1.2861	1.6121	2.7398	22.304	6.6665	11.19		1.047	1.4986	1.8891	1.7191	0.72808	1.363	2.1497	14.586		42.901	20.791	52.076	174.17	91.157	26.501	186.18	83.941		4.61	32.399	12.671	12.622
86.1923	6.2075	0.12864	8.7892	19.72	5.3519	1.446	4.9796	7.7696		1.7282	20.636	4.8782	2.568	1.1083	1.8043	6.9758	6.8209		8.3197	11.092	1.3093	1.5912	2.7913	21.41	6.8707	11.531		1.0542	1.4976	1.719	1.7712	0.70764	1.4061	2.1227	14.419		45.489	22.412	49.893	173.57	85.892	26.788	184.26	89.034		4.5143	33.953	12.324	12.349
86.7115	6.2906	0.12788	8.8801	19.069	5.2512	1.4334	5.1333	8.1282		1.6763	18.821	4.8787	2.6661	1.0862	1.9595	7.0764	6.6712		8.3552	10.971	1.3312	1.5768	2.8474	20.504	7.0502	11.85		1.0563	1.4953	1.5612	1.8238	0.68996	1.4495	2.0872	14.254		48.115	24.012	48.563	172.55	80.763	26.985	181.85	93.937		4.4066	35.381	11.871	12.104
87.2308	6.3629	0.12724	8.9801	18.375	5.1396	1.4221	5.2743	8.4727		1.6254	17.137	4.8747	2.779	1.0793	2.1206	7.1326	6.5405		8.4234	10.867	1.3513	1.5681	2.9078	19.603	7.2019	12.141		1.0531	1.4914	1.4163	1.8759	0.6754	1.4928	2.0435	14.095		50.752	25.564	48.144	171.1	75.838	27.09	178.98	98.553		4.2899	36.65	11.32	11.887
87.75	6.4227	0.12673	9.09	17.641	5.0167	1.412	5.4006	8.7967		1.5761	15.6	4.8645	2.9057	1.0879	2.2866	7.142	6.4274		8.5231	10.78	1.3694	1.5643	2.9724	18.722	7.3229	12.397		1.0448	1.4858	1.2848	1.9268	0.66429	1.5356	1.9925	13.943		53.364	27.042	48.675	169.24	71.178	27.107	175.68	102.79		4.1676	37.73	10.681	11.698
88.2692	6.4683	0.12637	9.21	16.873	4.8826	1.4034	5.5106	9.0945		1.5292	14.222	4.8462	3.0447	1.1117	2.4559	7.1033	6.3302		8.6529	10.707	1.3854	1.5644	3.0407	17.876	7.4108	12.614		1.0316	1.4781	1.1668	1.9758	0.65688	1.5774	1.9349	13.802		55.912	28.422	50.175	166.99	66.836	27.036	172	106.55		4.0431	38.597	9.9656	11.534
88.7885	6.4984	0.12616	9.3402	16.08	4.7374	1.3963	5.6029	9.3604		1.4852	13.016	4.818	3.1948	1.1502	2.6271	7.0166	6.247		8.8112	10.648	1.3992	1.5673	3.1128	17.081	7.4641	12.785		1.0139	1.4682	1.0625	2.0224	0.65336	1.6177	1.8717	13.671		58.354	29.684	52.64	164.37	62.862	26.881	168.01	109.76		3.92	39.23	9.1877	11.392
89.3077	6.5117	0.1261	9.4802	15.267	4.5812	1.3907	5.6761	9.5893		1.4449	11.992	4.778	3.3545	1.2028	2.7987	6.8833	6.176		8.9958	10.601	1.4108	1.5721	3.1884	16.35	7.4819	12.908		0.99229	1.4559	0.97157	2.066	0.65383	1.6562	1.8039	13.552		60.643	30.81	56.049	161.4	59.296	26.643	163.77	112.35		3.8019	39.614	8.3632	11.267
89.8269	6.5072	0.12621	9.6294	14.446	4.4145	1.3867	5.7292	9.7769		1.4089	11.16	4.7246	3.5224	1.2683	2.9689	6.706	6.1149		9.2044	10.563	1.4204	1.5777	3.2674	15.695	7.464	12.977		0.96729	1.441	0.89375	2.1065	0.65832	1.6925	1.7325	13.443		62.729	31.785	60.357	158.11	56.172	26.326	159.36	114.25		3.6923	39.739	7.51	11.155
90.3462	6.484	0.12647	9.7864	13.625	4.2381	1.3844	5.7615	9.9196		1.3778	10.528	4.656	3.6969	1.3454	3.136	6.4885	6.0618		9.4342	10.535	1.4281	1.5832	3.3496	15.127	7.411	12.992		0.9396	1.4233	0.82853	2.1436	0.66678	1.7262	1.6587	13.343		64.564	32.599	65.503	154.54	53.515	25.933	154.86	115.42		3.5944	39.601	6.6476	11.05
90.8654	6.4418	0.12688	9.9498	12.814	4.0527	1.3837	5.7725	10.015		1.3522	10.103	4.5712	3.8764	1.4327	3.2983	6.2357	6.0145		9.6827	10.515	1.4344	1.5878	3.4345	14.657	7.3243	12.951		0.90998	1.4029	0.77531	2.1772	0.67911	1.7571	1.5837	13.25		66.098	33.245	71.406	150.71	51.345	25.465	150.36	115.81		3.5112	39.203	5.7969	10.946
91.3846	6.3801	0.12744	10.118	12.024	3.8594	1.3846	5.7622	10.061		1.3326	9.8908	4.4692	4.059	1.5284	3.4539	5.9537	5.9711		9.9466	10.501	1.4395	1.5908	3.5219	14.291	7.2058	12.854		0.87923	1.3795	0.73341	2.2076	0.69513	1.785	1.5086	13.159		67.284	33.723	77.968	146.67	49.673	24.928	145.95	115.4		3.4455	38.552	4.9805	10.838
91.9038	6.2994	0.12814	10.288	11.264	3.6594	1.387	5.7306	10.056		1.3194	9.8948	4.3497	4.2429	1.6307	3.6011	5.6493	5.9296		10.223	10.493	1.4438	1.5914	3.6113	14.037	7.0583	12.702		0.84816	1.3531	0.70208	2.2347	0.71458	1.8098	1.4344	13.068		68.081	34.034	85.08	142.46	48.504	24.323	141.7	114.18		3.3994	37.66	4.2215	10.721
92.4231	6.1999	0.12896	10.459	10.544	3.454	1.391	5.6783	10.003		1.3131	10.118	4.2128	4.4261	1.7375	3.7379	5.33	5.8885		10.509	10.491	1.4478	1.5894	3.702	13.899	6.885	12.497		0.81756	1.3237	0.68051	2.2589	0.73717	1.8317	1.3624	12.973		68.453	34.185	92.619	138.14	47.835	23.654	137.69	112.13		3.3749	36.546	3.5441	10.59
92.9423	6.0826	0.12989	10.627	9.8734	3.2449	1.3964	5.6065	9.9006		1.314	10.559	4.0593	4.6065	1.8468	3.8628	5.0038	5.8461		10.801	10.495	1.4517	1.5844	3.7934	13.879	6.6899	12.242		0.7882	1.2912	0.66788	2.2805	0.76258	1.8508	1.2936	12.869		68.373	34.189	100.45	133.74	47.66	22.923	134	109.28		3.3733	35.232	2.9727	10.441
93.4615	5.9487	0.13092	10.792	9.26	3.0337	1.4031	5.5162	9.7525		1.3223	11.218	3.8903	4.7818	1.9564	3.974	4.6791	5.8013		11.095	10.506	1.4561	1.5763	3.8846	13.979	6.4769	11.942		0.76081	1.2558	0.66337	2.2998	0.79044	1.8674	1.229	12.752		67.824	34.058	108.45	129.31	47.965	22.136	130.67	105.64		3.3956	33.747	2.5318	10.271
93.9808	5.7995	0.13203	10.95	8.7108	2.8221	1.4111	5.4094	9.5617		1.3382	12.09	3.7078	4.9499	2.0643	4.07	4.3641	5.7532		11.389	10.525	1.4611	1.5652	3.9748	14.198	6.2507	11.601		0.73603	1.2175	0.66615	2.3171	0.82033	1.8822	1.1696	12.619		66.801	33.81	116.45	124.9	48.735	21.295	127.77	101.25		3.4423	32.119	2.2454	10.077
94.5	5.637	0.13321	11.101	8.2314	2.6121	1.4201	5.2879	9.3322		1.3618	13.168	3.5144	5.1084	2.1684	4.1495	4.0672	5.7009		11.678	10.553	1.467	1.5511	4.0629	14.535	6.0158	11.226		0.71442	1.1765	0.67541	2.3329	0.85185	1.8956	1.1162	12.468		65.313	33.464	124.34	120.55	49.948	20.405	125.32	96.148		3.5133	30.383	2.1364	9.8595
95.0192	5.463	0.13442	11.241	7.8262	2.4055	1.4301	5.154	9.0686		1.3931	14.445	3.3129	5.2553	2.2667	4.2112	3.7959	5.6443		11.96	10.591	1.4739	1.5344	4.148	14.985	5.7768	10.824		0.69645	1.1329	0.69036	2.3474	0.88456	1.9085	1.0697	12.296		63.385	33.043	131.96	116.29	51.582	19.47	123.34	90.397		3.6084	28.573	2.2263	9.6164
95.5385	5.2797	0.13566	11.371	7.4979	2.2045	1.4409	5.0102	8.7763		1.4319	15.908	3.107	5.3883	2.3573	4.2543	3.5574	5.583		12.231	10.641	1.4821	1.5154	4.2289	15.544	5.5386	10.401		0.68248	1.0872	0.71022	2.3608	0.91801	1.9218	1.0308	12.102		61.054	32.567	139.19	112.16	53.614	18.499	121.86	84.064		3.7268	26.727	2.5344	9.3485
96.0577	5.0894	0.1369	11.488	7.2479	2.0109	1.4524	4.8593	8.4609		1.478	17.542	2.9003	5.5056	2.4387	4.2779	3.3579	5.5173		12.489	10.707	1.4913	1.4946	4.3045	16.207	5.3055	9.9671		0.67275	1.0397	0.73427	2.3734	0.95176	1.9365	1	11.887		58.376	32.06	145.9	108.18	56.018	17.497	120.88	77.231		3.8674	24.881	3.0772	9.0567
96.5769	4.8944	0.13812	11.592	7.0757	1.8265	1.4644	4.704	8.1283		1.5311	19.331	2.6972	5.6053	2.5092	4.2816	3.2029	5.4475		12.73	10.791	1.5016	1.4724	4.3736	16.966	5.0818	9.5292		0.66739	0.99085	0.76178	2.3853	0.98534	1.9537	0.97804	11.653		55.419	31.543	151.97	104.37	58.77	16.474	120.37	69.988		4.0288	23.072	3.8681	8.7429
97.0962	4.697	0.13929	11.681	6.9796	1.6533	1.4768	4.5471	7.7846		1.5909	21.254	2.5019	5.6859	2.5678	4.2654	3.0964	5.3742		12.952	10.896	1.5127	1.4492	4.435	17.816	4.8713	9.0959		0.66642	0.94129	0.79206	2.3966	1.0183	1.9745	0.96514	11.402		52.267	31.037	157.31	100.73	61.847	15.44	120.33	62.437		4.2095	21.337	4.9164	8.4094
97.6154	4.4996	0.14041	11.756	6.9562	1.4927	1.4894	4.3914	7.4357		1.6566	23.287	2.319	5.7462	2.6133	4.2293	3.0412	5.2979		13.152	11.024	1.5244	1.4256	4.4875	18.748	4.6777	8.6756		0.66975	0.89165	0.82446	2.4071	1.0502	2	0.96164	11.138		49.016	30.562	161.83	97.26	65.228	14.409	120.73	54.688		4.4075	19.708	6.2268	8.059
98.1346	4.3044	0.14145	11.815	7.0007	1.3464	1.5021	4.2397	7.0876		1.7277	25.407	2.1528	5.7853	2.6453	4.1739	3.039	5.2195		13.33	11.18	1.5364	1.4021	4.5301	19.755	4.5039	8.2761		0.6772	0.84269	0.85835	2.4167	1.0807	2.0314	0.96767	10.868		45.769	30.133	165.45	93.957	68.893	13.395	121.54	46.862		4.6208	18.221	7.7994	7.6947
98.6539	4.1136	0.14239	11.858	7.1072	1.2156	1.5149	4.0947	6.7459		1.8034	27.583	2.008	5.8027	2.6632	4.0999	3.0899	5.1397		13.485	11.367	1.5483	1.3791	4.5618	20.829	4.3522	7.905		0.68849	0.7952	0.89313	2.4253	1.1093	2.0697	0.98325	10.598		42.641	29.765	168.11	90.804	72.827	12.415	122.71	39.084		4.8472	16.903	9.6285	7.3202
99.1731	3.9293	0.14322	11.886	7.2686	1.1014	1.5275	3.9589	6.4161		1.8829	29.788	1.8886	5.7981	2.6671	4.0084	3.1927	5.0592		13.614	11.587	1.5598	1.357	4.5816	21.961	4.2248	7.569		0.70328	0.75004	0.92825	2.4324	1.1357	2.1159	1.0083	10.334		39.746	29.469	169.78	87.778	77.014	11.486	124.21	31.486		5.0844	15.783	11.703	6.9389
99.6923	3.7533	0.14392	11.898	7.4769	1.0045	1.54	3.8346	6.103		1.9652	31.989	1.7987	5.7718	2.6572	3.9009	3.3449	4.9787		13.718	11.843	1.5704	1.3362	4.5887	23.143	4.1228	7.2739		0.72115	0.70811	0.96318	2.4378	1.1594	2.1707	1.0424	10.085		37.202	29.252	170.42	84.851	81.442	10.63	125.99	24.206		5.3299	14.885	14.005	6.5546
100.212	3.5874	0.14448	11.894	7.7237	0.92545	1.5522	3.7241	5.8113		2.0494	34.153	1.7419	5.7242	2.6343	3.779	3.5426	4.8988		13.797	12.138	1.5798	1.3168	4.5824	24.367	4.047	7.0247		0.74164	0.67033	0.99747	2.441	1.1804	2.2348	1.0853	9.8593		35.124	29.118	170.02	81.993	86.1	9.8679	128.01	17.383		5.5811	14.231	16.512	6.1708
100.731	3.4333	0.1449	11.875	7.9998	0.86453	1.5641	3.6296	5.5449		2.1345	36.249	1.7214	5.6564	2.599	3.6447	3.7809	4.8198		13.851	12.473	1.5874	1.2992	4.5623	25.626	3.9977	6.8251		0.76429	0.63759	1.0307	2.4414	1.1982	2.3086	1.1364	9.664		33.618	29.067	168.6	79.167	90.975	9.2224	130.21	11.159		5.8354	13.837	19.194	5.7912
101.25	3.2926	0.14518	11.84	8.296	0.8217	1.5756	3.5528	5.3071		2.2193	38.244	1.7399	5.5695	2.5526	3.5001	4.0536	4.7423		13.88	12.849	1.5931	1.2835	4.5279	26.91	3.9743	6.6776		0.78858	0.61078	1.0625	2.4386	1.2128	2.3923	1.1949	9.5067		32.784	29.095	166.17	76.338	96.055	8.7163	132.57	5.6725		6.0902	13.717	22.018	5.419
101.769	3.1667	0.14531	11.79	8.6029	0.79664	1.5868	3.4957	5.1008		2.3028	40.106	1.7996	5.4651	2.4964	3.3477	4.354	4.6662		13.886	13.266	1.5963	1.2698	4.4792	28.212	3.9762	6.5836		0.814	0.59074	1.0926	2.4322	1.2241	2.4859	1.26	9.3941		32.704	29.194	162.76	73.47	101.32	8.3726	135.01	1.0631		6.3429	13.883	24.941	5.0575
102.288	3.0569	0.14529	11.725	8.9114	0.78875	1.5976	3.4598	4.9278		2.384	41.805	1.902	5.3449	2.4319	3.1898	4.6743	4.5917		13.868	13.722	1.5969	1.2581	4.4161	29.525	4.002	6.5431		0.84005	0.57824	1.1208	2.4215	1.2319	2.5888	1.3308	9.3315		33.447	29.356	158.42	70.528	106.76	8.2129	137.5	-2.536		6.5909	14.34	27.921	4.7095
102.808	2.9645	0.14515	11.645	9.2128	0.79718	1.608	3.4466	4.7894		2.4618	43.314	2.048	5.211	2.3606	3.0291	5.0065	4.5189		13.828	14.214	1.5946	1.2484	4.3388	30.841	4.0501	6.555		0.86624	0.57393	1.1469	2.4063	1.2364	2.7005	1.406	9.3233		35.062	29.566	153.2	67.482	112.35	8.2576	139.98	-4.9979		6.8316	15.09	30.909	4.3773
103.327	2.8906	0.14487	11.549	9.4988	0.82082	1.6181	3.4575	4.6863		2.5353	44.608	2.2377	5.0656	2.2843	2.8682	5.3421	4.4475		13.766	14.739	1.5891	1.2407	4.2478	32.152	4.1186	6.6168		0.8921	0.57837	1.1707	2.3861	1.2376	2.82	1.4846	9.3718		37.575	29.811	147.18	64.304	118.05	8.5243	142.4	-6.2047		7.0628	16.133	33.853	4.0631
103.846	2.8363	0.14448	11.437	9.7618	0.85834	1.6279	3.4936	4.6181		2.6036	45.666	2.4708	4.9111	2.2045	2.7099	5.6727	4.3774		13.681	15.291	1.5805	1.235	4.1437	33.451	4.2053	6.7253		0.91717	0.59197	1.1924	2.3608	1.2357	2.9459	1.5652	9.4781		40.989	30.072	140.42	60.974	123.83	9.0276	144.71	-6.0503		7.282	17.464	36.7	3.7685
104.365	2.8026	0.14399	11.308	9.9948	0.90822	1.6374	3.5559	4.5839		2.6659	46.47	2.7459	4.75	2.1229	2.5569	5.9901	4.3086		13.574	15.863	1.5687	1.2312	4.0274	34.73	4.3079	6.8762		0.94104	0.61498	1.2118	2.33	1.231	3.0767	1.6465	9.6414		45.281	30.335	133.02	57.478	129.65	9.7782	146.86	-4.4423		7.4872	19.073	39.398	3.4946
104.885	2.7901	0.14341	11.161	10.192	0.96876	1.6466	3.6452	4.5819		2.7213	47.007	3.0612	4.5848	2.0409	2.4116	6.2863	4.2408		13.445	16.447	1.5537	1.2293	3.9	35.981	4.4239	7.0644		0.96333	0.64748	1.2291	2.2939	1.2236	3.2103	1.7271	9.8591		50.402	30.58	125.05	53.811	135.47	10.782	148.79	-1.3054		7.6766	20.949	41.894	3.242
105.404	2.7996	0.14276	10.995	10.348	1.0381	1.6555	3.7619	4.6096		2.7692	47.27	3.4142	4.4179	1.9599	2.2768	6.554	4.174		13.294	17.032	1.5357	1.2293	3.7625	37.197	4.5508	7.2843		0.9837	0.68936	1.2443	2.2525	1.214	3.3449	1.8056	10.127		56.276	30.793	116.61	49.975	141.24	12.04	150.45	3.4164		7.8483	23.077	44.139	3.011
105.923	2.8316	0.14204	10.809	10.458	1.1144	1.6643	3.9063	4.6642		2.809	47.254	3.8014	4.2518	1.8813	2.1546	6.7865	4.1081		13.119	17.609	1.5149	1.2312	3.6165	38.367	4.6862	7.53		1.0018	0.7403	1.2575	2.2061	1.2026	3.478	1.8805	10.44		62.797	30.957	107.8	45.983	146.9	13.546	151.8	9.7572		8.001	25.437	46.085	2.8014
106.442	2.8863	0.14128	10.601	10.52	1.1956	1.673	4.0783	4.742		2.84	46.962	4.2192	4.0886	1.806	2.0472	6.978	4.0429		12.92	18.166	1.4916	1.2351	3.4634	39.484	4.8276	7.7952		1.0175	0.79979	1.2689	2.1552	1.1896	3.6072	1.9506	10.791		69.836	31.061	98.718	41.856	152.39	15.289	152.78	17.726		8.1333	28.008	47.693	2.6125
106.962	2.964	0.14049	10.37	10.531	1.2797	1.6814	4.2773	4.8394		2.8618	46.398	4.6631	3.9305	1.7351	1.9567	7.1239	3.9786		12.698	18.692	1.4662	1.241	3.3048	40.539	4.9729	8.0736		1.0305	0.86712	1.2786	2.1003	1.1757	3.7301	2.0146	11.172		77.237	31.094	89.482	37.624	157.66	17.251	153.35	27.307		8.2442	30.766	48.928	2.4432
107.481	3.0645	0.13968	10.116	10.489	1.3647	1.6898	4.5024	4.9521		2.874	45.574	5.128	3.7792	1.6691	1.8845	7.2203	3.915		12.451	19.173	1.4392	1.2492	3.1424	41.522	5.1197	8.3593		1.0407	0.94139	1.2868	2.0421	1.1611	3.8442	2.0711	11.576		84.819	31.049	80.2	33.329	162.66	19.407	153.45	38.454		8.3328	33.684	49.762	2.2923
108	3.1877	0.13887	9.8385	10.395	1.4487	1.698	4.7523	5.076		2.8762	44.504	5.6087	3.6363	1.6088	1.8321	7.2647	3.8521		12.18	19.599	1.411	1.2597	2.978	42.426	5.2661	8.6464		1.0479	1.0215	1.2935	1.9817	1.1464	3.9472	2.1192	11.992		92.38	30.922	70.99	29.02	167.31	21.725	153.07	51.092		8.3983	36.733	50.178	2.1584
108.519	3.3331	0.13808	9.5378	10.248	1.5297	1.706	5.0251	5.2071		2.8682	43.207	6.0994	3.5032	1.5545	1.8002	7.2558	3.79		11.886	19.959	1.3822	1.2727	2.8131	43.241	5.4102	8.9294		1.0521	1.1063	1.2988	1.9199	1.132	4.0368	2.1578	12.414		99.701	30.712	61.977	24.755	171.56	24.167	152.14	65.114		8.4403	39.881	50.165	2.0396
109.038	3.5003	0.13731	9.2151	10.051	1.606	1.7139	5.3188	5.3414		2.8498	41.703	6.5941	3.3807	1.5065	1.7895	7.1933	3.7284		11.569	20.242	1.3534	1.2885	2.6496	43.959	5.5502	9.2037		1.0533	1.1943	1.3029	1.8579	1.1183	4.1109	2.1861	12.832		106.55	30.422	53.293	20.602	175.37	26.687	150.66	80.383		8.4585	43.095	49.725	1.9344
109.558	3.6885	0.13657	8.8721	9.804	1.676	1.7215	5.6306	5.4756		2.8209	40.018	7.0866	3.2695	1.4649	1.7999	7.078	3.6672		11.231	20.442	1.3251	1.3073	2.489	44.574	5.6846	9.4648		1.0514	1.2842	1.3059	1.7971	1.1057	4.168	2.2036	13.239		112.67	30.059	45.078	16.633	178.67	29.237	148.59	96.731		8.4526	46.342	48.867	1.841
110.077	3.897	0.13588	8.5115	9.5116	1.7382	1.7289	5.9575	5.6066		2.7817	38.178	7.5706	3.1699	1.4299	1.8312	6.9119	3.6063		10.875	20.55	1.2981	1.3291	2.3328	45.078	5.8118	9.7093		1.0465	1.3743	1.3076	1.7386	1.0945	4.2064	2.2097	13.628		117.81	29.631	37.478	12.931	181.42	31.762	145.92	113.96		8.4227	49.585	47.611	1.7576
110.596	4.1249	0.13524	8.1367	9.177	1.7915	1.7359	6.2961	5.7322		2.7324	36.211	8.0399	3.0821	1.4014	1.8824	6.698	3.5454		10.502	20.563	1.2728	1.3543	2.1826	45.465	5.9304	9.9341		1.0388	1.4631	1.3084	1.684	1.085	4.2252	2.2042	13.994		121.72	29.151	30.65	9.5791	183.58	34.202	142.65	131.85		8.3691	52.788	45.986	1.6829
111.115	4.3712	0.13467	7.752	8.8047	1.8347	1.7426	6.6426	5.8505		2.6732	34.146	8.4884	3.0058	1.3793	1.9523	6.4401	3.4842		10.117	20.478	1.2498	1.383	2.0395	45.731	6.0393	10.137		1.0283	1.5491	1.308	1.6346	1.0774	4.2237	2.1872	14.333		124.15	28.631	24.76	6.6672	185.12	36.497	138.78	150.15		8.2922	55.917	44.031	1.6153
111.635	4.6348	0.13416	7.3623	8.3998	1.8672	1.7488	6.9929	5.9608		2.6046	32.012	8.9106	2.9406	1.3637	2.0391	6.1426	3.4223		9.723	20.298	1.2298	1.4152	1.9048	45.87	6.137	10.316		1.0152	1.6308	1.3068	1.5916	1.0719	4.2016	2.1587	14.64		124.86	28.09	19.983	4.2859	186.01	38.585	134.32	168.59		8.1927	58.934	41.791	1.5538
112.154	4.9147	0.13371	6.9732	7.9679	1.8884	1.7545	7.3428	6.0627		2.5273	29.839	9.301	2.886	1.3543	2.1406	5.8107	3.3594		9.3241	20.024	1.2131	1.451	1.7794	45.88	6.2226	10.471		0.99974	1.7067	1.3048	1.5564	1.0685	4.159	2.1193	14.914		123.62	27.542	16.502	2.5259	186.22	40.404	129.31	186.88		8.0715	61.805	39.319	1.4974
112.673	5.2096	0.13334	6.5907	7.5152	1.8982	1.7597	7.6878	6.1568		2.4421	27.656	9.655	2.8411	1.351	2.2544	5.45	3.2953		8.9251	19.663	1.2002	1.4904	1.6642	45.758	6.2948	10.6		0.98212	1.7756	1.302	1.53	1.0674	4.0966	2.0695	15.155		120.23	27.008	14.509	1.4759	185.75	41.893	123.79	204.74		7.9295	64.496	36.674	1.4453
113.192	5.5183	0.13304	6.2213	7.0482	1.8964	1.7643	8.0232	6.2443		2.3497	25.489	9.9685	2.8051	1.3537	2.3776	5.0665	3.2297		8.5306	19.224	1.1912	1.5334	1.5597	45.501	6.3527	10.704		0.9626	1.8363	1.2989	1.5134	1.0684	4.0152	2.0102	15.361		114.54	26.504	14.199	1.2206	184.6	42.998	117.82	221.86		7.7682	66.974	33.918	1.397
113.711	5.8394	0.1328	5.8718	6.5737	1.8835	1.7682	8.3443	6.3268		2.2513	23.366	10.238	2.777	1.3622	2.507	4.6662	3.1623		8.1455	18.716	1.1865	1.5797	1.4665	45.108	6.3954	10.783		0.94145	1.888	1.2956	1.5073	1.0714	3.9163	1.9423	15.534		106.41	26.05	15.775	1.838	182.76	43.666	111.47	237.96		7.5889	69.21	31.119	1.3524
114.231	6.1712	0.13262	5.5491	6.0987	1.8599	1.7714	8.6462	6.4066		2.148	21.309	10.461	2.7559	1.3762	2.6394	4.2552	3.093		7.7746	18.153	1.186	1.6292	1.3848	44.581	6.4221	10.837		0.91897	1.9298	1.2926	1.5123	1.0763	3.8016	1.8672	15.676		95.767	25.664	19.437	3.3976	180.27	43.854	104.83	252.76		7.3934	71.176	28.341	1.3112
114.75	6.512	0.13249	5.2598	5.6302	1.8264	1.7739	8.9243	6.486		2.041	19.339	10.636	2.7408	1.3956	2.7715	3.8395	3.0219		7.4225	17.549	1.1898	1.6816	1.3145	43.919	6.4321	10.867		0.89547	1.9613	1.2904	1.5285	1.0827	3.6732	1.7861	15.789		82.589	25.361	25.383	5.9579	177.13	43.528	98.001	265.98		7.1833	72.847	25.653	1.2738
115.269	6.8597	0.13242	5.0106	5.175	1.7838	1.7756	9.1738	6.5679		1.9316	17.476	10.762	2.7305	1.42	2.8997	3.4251	2.9492		7.0938	16.92	1.1976	1.7364	1.2557	43.126	6.4251	10.873		0.87124	1.9821	1.2894	1.5562	1.0905	3.5334	1.7005	15.875		66.916	25.157	33.806	9.5642	173.37	42.665	91.109	277.4		6.9608	74.201	23.118	1.2403
115.788	7.212	0.13239	4.8076	4.7395	1.7334	1.7765	9.3902	6.6551		1.821	15.735	10.839	2.7243	1.4491	3.0209	3.0174	2.8752		6.7922	16.28	1.2093	1.7931	1.2079	42.204	6.4006	10.858		0.84661	1.9923	1.2905	1.5949	1.0992	3.3849	1.612	15.936		48.86	25.067	44.883	14.247	169.04	41.254	84.284	286.82		6.7279	75.22	20.799	1.2111
116.308	7.5661	0.1324	4.6563	4.3299	1.6764	1.7766	9.5693	6.7504		1.7107	14.128	10.867	2.7209	1.4824	3.1319	2.6218	2.8004		6.5213	15.647	1.2244	1.8512	1.1706	41.16	6.3589	10.821		0.82188	1.9919	1.2944	1.6441	1.1085	3.2306	1.5222	15.976		28.611	25.102	58.776	20.02	164.18	39.3	77.675	294.09		6.4869	75.89	18.753	1.1868
116.827	7.919	0.13244	4.5616	3.9518	1.6141	1.7759	9.7073	6.8565		1.6019	12.665	10.847	2.7195	1.5196	3.2297	2.243	2.7254		6.2838	15.036	1.2426	1.91	1.1434	39.999	6.3	10.765		0.79734	1.9815	1.302	1.7032	1.1181	3.0733	1.4328	15.995		6.4391	25.272	75.622	26.877	158.84	36.821	71.439	299.08		6.2402	76.201	17.033	1.168
117.346	8.2671	0.1325	4.5272	3.6101	1.548	1.7743	9.8006	6.9759		1.4958	11.353	10.781	2.7192	1.56	3.3118	1.8856	2.6511		6.0817	14.462	1.2634	1.9688	1.1252	38.729	6.2245	10.691		0.77325	1.9615	1.3143	1.7711	1.1276	2.9162	1.3454	15.997		-17.296	25.586	95.53	34.794	153.07	33.854	65.746	301.75		5.9901	76.149	15.683	1.1553
117.865	8.6066	0.13258	4.5562	3.309	1.4798	1.772	9.8465	7.1108		1.3938	10.197	10.673	2.719	1.603	3.3759	1.5534	2.5782		5.9161	13.938	1.2862	2.0268	1.1153	37.361	6.1333	10.599		0.74986	1.9327	1.3323	1.8466	1.1365	2.7622	1.2618	15.982		-42.148	26.051	118.57	43.727	146.94	30.456	60.776	302.1		5.7391	75.732	14.741	1.1493
118.385	8.9333	0.13267	4.65	3.0519	1.4109	1.7689	9.8428	7.263		1.2969	9.1975	10.524	2.718	1.648	3.4204	1.2502	2.5079		5.7875	13.475	1.3105	2.0833	1.1127	35.906	6.0275	10.492		0.72738	1.8961	1.3571	1.9282	1.1446	2.6145	1.1834	15.951		-67.579	26.671	144.78	53.608	140.52	26.699	56.715	300.18		5.4897	74.958	14.237	1.1505
118.904	9.2425	0.13276	4.8092	2.8414	1.3429	1.7651	9.7884	7.4339		1.2063	8.3541	10.338	2.7154	1.6943	3.4438	0.97917	2.4411		5.6952	13.085	1.3356	2.1373	1.1162	34.377	5.9087	10.37		0.70601	1.8526	1.3898	2.0145	1.1514	2.4759	1.1117	15.905		-92.961	27.45	174.14	64.35	133.88	22.676	53.754	296.12		5.2444	73.837	14.192	1.1596
119.423	9.5296	0.13285	5.0328	2.679	1.2775	1.7605	9.6826	7.6244		1.123	7.6638	10.118	2.7104	1.741	3.4456	0.74296	2.3791		5.6379	12.772	1.3611	2.1881	1.1247	32.789	5.7785	10.234		0.68589	1.8034	1.4315	2.1037	1.1568	2.3491	1.0482	15.844		-117.58	28.39	206.59	75.847	127.13	18.501	52.091	290.11		5.0054	72.388	14.619	1.177
119.942	9.7896	0.13293	5.3185	2.5656	1.2162	1.7552	9.526	7.8349		1.0477	7.1216	9.8698	2.7021	1.7875	3.4254	0.54399	2.3228		5.6135	12.544	1.3863	2.2349	1.1371	31.158	5.6391	10.086		0.66714	1.7496	1.483	2.1941	1.1604	2.2368	0.99388	15.769		-140.66	29.491	242.01	87.971	120.34	14.304	51.921	282.39		4.7751	70.634	15.519	1.2029
120.462	10.018	0.133	5.6626	2.5011	1.1604	1.7492	9.32	8.0654		0.98144	6.7209	9.5964	2.6899	1.833	3.3835	0.38423	2.2734		5.619	12.4	1.4107	2.2771	1.1522	29.501	5.4929	9.9256		0.64985	1.6924	1.5453	2.284	1.1622	2.1411	0.94991	15.678		-161.31	30.753	280.21	100.58	113.62	10.235	53.442	273.27		4.5557	68.604	16.887	1.2376
120.981	10.209	0.13306	6.0601	2.4844	1.1117	1.7427	9.067	8.3152		0.92475	6.4536	9.3023	2.6731	1.8766	3.3207	0.26525	2.2318		5.6509	12.341	1.4337	2.314	1.1689	27.835	5.3423	9.7549		0.63408	1.6329	1.6191	2.3716	1.1619	2.0641	0.9171	15.571		-178.64	32.175	320.96	113.51	107.07	6.4576	56.849	263.1		4.349	66.331	18.709	1.2811
121.5	10.36	0.13309	6.5047	2.5139	1.0713	1.7355	8.7701	8.5834		0.87825	6.3104	8.9923	2.6508	1.9178	3.2383	0.1883	2.199		5.7053	12.363	1.455	2.3452	1.1861	26.18	5.1899	9.5739		0.61984	1.5724	1.7048	2.4553	1.1596	2.0074	0.89608	15.448		-191.66	33.754	363.95	126.59	100.81	3.1521	62.332	252.3		4.157	63.855	20.959	1.3332
122.019	10.467	0.1331	6.9891	2.5868	1.0404	1.7278	8.4335	8.8685		0.84244	6.281	8.6711	2.6226	1.9557	3.1379	0.1542	2.1758		5.7778	12.459	1.4741	2.3701	1.2027	24.554	5.0386	9.3832		0.60715	1.5118	1.8027	2.5335	1.1553	1.9721	0.88731	15.309		-199.38	35.486	408.83	139.64	94.97	0.50925	70.075	241.34		3.9812	61.217	23.607	1.3938
122.538	10.525	0.13308	7.5048	2.7	1.02	1.7197	8.0622	9.1686		0.81768	6.3545	8.3433	2.5879	1.99	3.0216	0.16345	2.1629		5.864	12.622	1.4905	2.3885	1.2178	22.975	4.891	9.1832		0.59598	1.4521	1.9127	2.6048	1.1491	1.9593	0.89101	15.154		-200.79	37.366	455.16	152.47	89.663	-1.2716	80.254	230.7		3.8231	58.462	26.614	1.4622
123.058	10.534	0.13303	8.0423	2.8495	1.011	1.7111	7.6617	9.4816		0.80422	6.5192	8.0137	2.5462	2.0199	2.8916	0.21615	2.1609		5.9593	12.842	1.504	2.4002	1.2305	21.46	4.7498	8.9741		0.58627	1.3943	2.0347	2.6679	1.1414	1.9694	0.90721	14.984		-194.9	39.389	502.47	164.89	85.024	-1.9862	93.031	220.92		3.6838	55.634	29.935	1.5379
123.577	10.492	0.13294	8.5918	3.031	1.0141	1.7022	7.2381	9.8051		0.80224	6.7635	7.6869	2.4971	2.0451	2.7505	0.31203	2.1702		6.0593	13.105	1.5141	2.4052	1.2401	20.028	4.6173	8.7561		0.57796	1.3391	2.168	2.7218	1.1324	2.0024	0.93574	14.8		-180.73	41.546	550.22	176.7	81.184	-1.4302	108.56	212.56		3.5641	52.781	33.519	1.6202
124.096	10.398	0.13281	9.1426	3.2395	1.0297	1.693	6.7981	10.137		0.81178	7.0754	7.3677	2.4404	2.0652	2.601	0.45045	2.1911		6.1601	13.398	1.5206	2.4036	1.2457	18.693	4.4959	8.5294		0.57096	1.2873	2.3115	2.7657	1.1226	2.0581	0.97625	14.606		-157.38	43.829	597.84	187.73	78.275	0.59693	126.97	206.18		3.4646	49.947	37.309	1.708
124.615	10.255	0.13263	9.684	3.4698	1.0581	1.6835	6.3483	10.474		0.83276	7.4432	7.0603	2.3758	2.08	2.4459	0.63036	2.2237		6.258	13.707	1.5231	2.3955	1.2469	17.47	4.3875	8.2942		0.56519	1.2392	2.4642	2.7989	1.1125	2.1356	1.0282	14.402		-124.02	46.225	644.71	197.79	76.425	4.2862	148.39	202.34		3.3857	47.173	41.245	1.8004
125.135	10.063	0.13241	10.205	3.7166	1.0994	1.6739	5.8956	10.813		0.86502	7.8553	6.769	2.3034	2.0892	2.2879	0.85034	2.2678		6.3501	14.016	1.5216	2.3814	1.2433	16.371	4.2936	8.0506		0.56052	1.1955	2.6243	2.821	1.1026	2.234	1.0908	14.194		-79.921	48.722	690.19	206.73	75.76	9.8138	172.91	201.59		3.3273	44.501	45.266	1.8962
125.654	9.8268	0.13215	10.696	3.9742	1.1532	1.6641	5.447	11.153		0.90828	8.3008	6.4974	2.2235	2.0928	2.1297	1.1086	2.3233		6.4341	14.311	1.5156	2.3615	1.2343	15.408	4.2155	7.7988		0.55685	1.1563	2.7901	2.8319	1.0936	2.3517	1.1633	13.984		-24.496	51.304	733.63	214.4	76.394	17.336	200.6	204.45		3.2891	41.965	49.306	1.9943
126.173	9.5501	0.13182	11.146	4.2372	1.2193	1.6542	5.0088	11.49		0.96212	8.7692	6.2491	2.1362	2.0907	1.974	1.4029	2.3897		6.5085	14.576	1.5051	2.3365	1.2199	14.59	4.154	7.5393		0.55406	1.1218	2.9594	2.8316	1.086	2.4871	1.2447	13.777		42.688	53.954	774.37	220.68	78.431	26.981	231.52	211.41		3.2707	39.596	53.3	2.0934
126.692	9.2382	0.13145	11.545	4.5	1.297	1.6444	4.5874	11.822		1.026	9.2507	6.0268	2.0423	2.083	1.8232	1.7306	2.4666		6.5726	14.796	1.49	2.307	1.2	13.922	4.1094	7.2726		0.55205	1.0922	3.1299	2.8204	1.0806	2.6382	1.3338	13.577		121.89	56.651	811.78	225.48	81.959	38.85	265.7	222.9		3.2712	37.419	57.182	2.1924
127.212	8.8974	0.13102	11.887	4.7576	1.3854	1.6345	4.1883	12.145		1.0994	9.7364	5.8329	1.9425	2.07	1.6794	2.0888	2.5531		6.6265	14.96	1.4703	2.2737	1.1747	13.41	4.0816	6.9994		0.55072	1.0674	3.2991	2.7987	1.0781	2.8026	1.4294	13.39		213.16	59.373	845.24	228.73	87.05	53.001	303.12	239.27		3.2896	35.453	60.887	2.29
127.731	8.5342	0.13054	12.163	5.0048	1.4835	1.6248	3.8168	12.458		1.1815	10.218	5.669	1.8378	2.0519	1.5448	2.4742	2.6485		6.6709	15.054	1.4459	2.2372	1.1442	13.054	4.0701	6.7206		0.54998	1.0473	3.4642	2.7671	1.0791	2.978	1.5302	13.22		316.33	62.097	874.21	230.4	93.75	69.457	343.76	260.82		3.3248	33.713	64.354	2.3849
128.25	8.1558	0.13	12.369	5.2372	1.5899	1.6152	3.477	12.758		1.2716	10.689	5.5362	1.7295	2.0292	1.4209	2.8831	2.7519		6.7075	15.07	1.4172	2.1985	1.1089	12.853	4.074	6.4372		0.54978	1.0316	3.6226	2.7264	1.0843	3.1618	1.6347	13.07		431.03	64.799	898.18	230.49	102.09	88.19	387.56	287.73		3.3756	32.207	67.522	2.4762
128.769	7.7696	0.12942	12.499	5.4508	1.7033	1.6059	3.1728	13.042		1.3686	11.143	5.4346	1.6192	2.0025	1.3093	3.3117	2.8621		6.7383	14.999	1.3842	2.1581	1.0692	12.805	4.092	6.1506		0.55007	1.0202	3.7716	2.6774	1.0941	3.3514	1.7417	12.945		556.61	67.454	916.77	229.03	112.05	109.13	434.42	320.08		3.4405	30.936	70.338	2.5627
129.288	7.3829	0.12879	12.554	5.6419	1.8221	1.5968	2.9068	13.306		1.4715	11.574	5.3638	1.5085	1.9723	1.2111	3.7556	2.9782		6.7658	14.837	1.3475	2.1171	1.0259	12.904	4.1227	5.8622		0.55086	1.0126	3.9084	2.6212	1.1093	3.5443	1.8495	12.846		692.2	70.037	929.67	226.08	123.62	132.14	484.22	357.86		3.5181	29.899	72.752	2.6435
129.808	7.003	0.12812	12.532	5.8077	1.9446	1.588	2.6813	13.549		1.5793	11.979	5.3225	1.3993	1.9395	1.1273	4.2106	3.0989		6.793	14.58	1.3076	2.076	0.97964	13.141	4.164	5.5738		0.55217	1.0084	4.0306	2.559	1.1302	3.738	1.9568	12.777		836.69	72.528	936.69	221.75	136.72	157.06	536.82	400.91		3.607	29.089	74.721	2.7179
130.327	6.6367	0.12742	12.437	5.946	2.0689	1.5796	2.4973	13.767		1.6908	12.355	5.3089	1.2939	1.9049	1.0583	4.6721	3.2232		6.8229	14.229	1.2652	2.0356	0.93138	13.507	4.2139	5.287		0.55405	1.0073	4.1358	2.4917	1.1572	3.93	2.0619	12.739		988.75	74.906	937.77	216.16	151.27	183.65	592.01	448.98		3.7058	28.497	76.21	2.7852
130.846	6.2905	0.12669	12.271	6.0553	2.1932	1.5716	2.3555	13.957		1.8048	12.698	5.3202	1.1944	1.8693	1.0046	5.1356	3.3498		6.8586	13.786	1.2212	1.9967	0.88208	13.988	4.2703	5.004		0.55659	1.0087	4.2218	2.4207	1.1905	4.1182	2.1635	12.73		1146.8	77.156	932.99	209.48	167.14	211.63	649.59	501.66		3.8129	28.108	77.193	2.8449
131.365	5.9701	0.12595	12.042	6.1346	2.3155	1.564	2.2555	14.116		1.9199	13.008	5.3533	1.1032	1.834	0.96624	5.5966	3.4776		6.9028	13.256	1.1765	1.9596	0.83276	14.571	4.3309	4.7265		0.55992	1.0123	4.287	2.347	1.2304	4.3007	2.2601	12.751		1309.2	79.266	922.54	201.87	184.18	240.69	709.29	558.43		3.9268	27.907	77.651	2.8967
131.885	5.6804	0.12521	11.757	6.1839	2.434	1.557	2.1967	14.241		2.035	13.285	5.4044	1.0229	1.7997	0.94309	6.0507	3.6055		6.9582	12.647	1.1323	1.9249	0.78451	15.241	4.3934	4.4567		0.56418	1.0175	4.3299	2.272	1.2768	4.4757	2.3503	12.798		1474	81.229	906.75	193.53	202.21	270.45	770.8	618.66		4.0461	27.877	77.576	2.9405
132.404	5.4254	0.12447	11.425	6.2036	2.5467	1.5505	2.1774	14.33		2.1488	13.528	5.4694	0.95603	1.7675	0.93479	6.4935	3.7324		7.0267	11.967	1.0899	1.8929	0.73845	15.98	4.4556	4.1965		0.56954	1.0239	4.3495	2.1966	1.3298	4.6419	2.4326	12.869		1639.3	83.045	886.06	184.68	221.03	300.52	833.79	681.6		4.1693	28	76.972	2.9762
132.923	5.2084	0.12375	11.057	6.195	2.6519	1.5445	2.1958	14.379		2.26	13.74	5.5437	0.90503	1.7384	0.94081	6.9211	3.8572		7.11	11.229	1.0505	1.8638	0.6957	16.77	4.5154	3.9479		0.57617	1.0312	4.3454	2.1219	1.3891	4.7983	2.506	12.961		1802.9	84.72	861	175.53	240.43	330.46	897.85	746.38		4.2946	28.257	75.85	3.004
133.442	5.0315	0.12306	10.665	6.1597	2.748	1.5392	2.2495	14.388		2.3673	13.921	5.6226	0.8724	1.7134	0.96042	7.3298	3.979		7.2085	10.446	1.0157	1.8375	0.65737	17.593	4.571	3.7125		0.58428	1.0389	4.3175	2.0489	1.4545	4.9441	2.5691	13.068		1962.8	86.264	832.2	166.32	260.15	359.84	962.56	812.08		4.4204	28.631	74.232	3.0242
133.962	4.8957	0.12241	10.26	6.0999	2.8334	1.5346	2.3357	14.354		2.4697	14.074	5.7014	0.86051	1.6931	0.99277	7.7161	4.0968		7.3222	9.6314	0.98696	1.8141	0.62456	18.431	4.6209	3.4922		0.59402	1.0469	4.2662	1.9785	1.5256	5.0786	2.6209	13.186		2117.1	87.694	800.35	157.25	279.98	388.19	1027.4	877.68		4.5449	29.102	72.152	3.0374
134.481	4.8011	0.1218	9.8554	6.0184	2.907	1.5307	2.4516	14.277		2.5662	14.202	5.7753	0.87153	1.6783	1.0369	8.0771	4.2099		7.45	8.8008	0.96566	1.7932	0.59829	19.265	4.6638	3.2883		0.60557	1.0549	4.1925	1.9112	1.6018	5.2017	2.6605	13.31		2263.8	89.034	766.16	148.56	299.64	415.07	1091.8	942.16		4.666	29.652	69.648	3.044
135	4.7469	0.12124	9.4617	5.9181	2.9678	1.5276	2.5939	14.157		2.6557	14.31	5.8398	0.90739	1.6696	1.0916	8.4102	4.3175		7.5899	7.9696	0.95325	1.7745	0.57956	20.078	4.6987	3.1022		0.61908	1.0628	4.0975	1.8479	1.6825	5.3131	2.6871	13.435		2401.2	90.31	730.36	140.45	318.91	440.02	1155.2	1004.5		4.7818	30.263	66.768	3.0448
135.519	4.7311	0.12074	9.0904	5.8022	3.0152	1.5252	2.7594	13.993		2.7374	14.4	5.8906	0.96974	1.6675	1.1557	8.7131	4.4191		7.7392	7.1531	0.95107	1.7575	0.56928	20.852	4.7252	2.9349		0.63466	1.0705	3.9831	1.7888	1.7669	5.4128	2.7001	13.555		2527.6	91.555	693.68	133.12	337.56	462.64	1217	1063.5		4.89	30.917	63.566	3.0406
136.038	4.751	0.1203	8.7516	5.674	3.0489	1.5237	2.9447	13.787		2.8107	14.477	5.924	1.0598	1.6721	1.228	8.984	4.5143		7.8941	6.3662	0.96033	1.7418	0.56829	21.572	4.7431	2.7871		0.65238	1.0779	3.8512	1.7343	1.8544	5.5006	2.6993	13.668		2642	92.805	656.82	126.76	355.35	482.54	1276.4	1118.3		4.9883	31.598	60.099	3.0323
136.558	4.8033	0.11993	8.4538	5.5368	3.069	1.523	3.1465	13.54		2.875	14.546	5.9366	1.1785	1.6836	1.3071	9.2216	4.6028		8.0503	5.6234	0.9821	1.7268	0.57733	22.224	4.7525	2.6595		0.67227	1.0852	3.704	1.6847	1.9438	5.5765	2.6843	13.768		2743.2	94.097	620.43	121.52	372.11	499.39	1332.7	1168		5.0742	32.285	56.428	3.0209
137.077	4.8838	0.11963	8.2043	5.3939	3.0761	1.5232	3.3615	13.256		2.9298	14.61	5.9259	1.3262	1.702	1.3915	9.4248	4.6846		8.2027	4.9376	1.0172	1.712	0.59706	22.796	4.7542	2.5523		0.69432	1.0925	3.5441	1.6399	2.0343	5.6404	2.6554	13.854		2830.6	95.471	585.07	117.55	387.67	512.91	1385.2	1211.7		5.1453	32.963	52.616	3.0075
137.596	4.9879	0.1194	8.0082	5.2484	3.071	1.5243	3.5865	12.938		2.975	14.676	5.8898	1.5026	1.7271	1.4799	9.5929	4.7596		8.346	4.3206	1.0663	1.6967	0.62801	23.277	4.7489	2.4656		0.71845	1.0998	3.3741	1.5999	2.1247	5.6921	2.6129	13.925		2903.8	96.968	551.24	114.99	401.91	522.89	1433.2	1248.7		5.1993	33.611	48.723	2.9932
138.115	5.1108	0.11924	7.869	5.103	3.055	1.5264	3.8186	12.588		3.0103	14.745	5.8271	1.7071	1.7585	1.5709	9.7256	4.8281		8.4747	3.7823	1.1296	1.6806	0.67061	23.661	4.7379	2.3993		0.74454	1.1073	3.1968	1.5646	2.2138	5.7312	2.5575	13.978		2962.9	98.629	519.36	113.94	414.74	529.18	1476	1278.5		5.2336	34.211	44.81	2.9791
138.635	5.2473	0.11916	7.7882	4.9604	3.0298	1.5293	4.0548	12.212		3.0358	14.824	5.7374	1.9383	1.7957	1.6628	9.8229	4.8905		8.5831	3.3311	1.2072	1.6631	0.72516	23.94	4.7226	2.3529		0.77239	1.1153	3.0148	1.5338	2.3005	5.7573	2.4901	14.016		3008	100.49	489.74	114.47	426.11	531.72	1512.9	1300.7		5.2461	34.746	40.935	2.9666
139.154	5.3923	0.11915	7.7653	4.8226	2.9972	1.5332	4.2926	11.813		3.0517	14.914	5.621	2.1942	1.838	1.7544	9.885	4.9473		8.6659	2.9728	1.2988	1.644	0.79185	24.111	4.7045	2.3259		0.80177	1.1237	2.831	1.5071	2.3835	5.77	2.4117	14.038		3039.7	102.58	462.59	116.67	436.03	530.53	1543.3	1315.3		5.2349	35.194	37.151	2.9567
139.673	5.5407	0.11921	7.7978	4.6913	2.9595	1.538	4.5296	11.397		3.0581	15.02	5.4789	2.4724	1.8849	1.844	9.9125	4.999		8.7183	2.7116	1.4038	1.623	0.87071	24.173	4.6854	2.3176		0.83237	1.1327	2.6478	1.4842	2.4616	5.7687	2.3238	14.047		3058.8	104.94	438.04	120.55	444.54	525.69	1566.7	1322.3		5.1984	35.539	33.505	2.9505
140.192	5.6876	0.11935	7.8818	4.568	2.919	1.5437	4.764	10.969		3.0556	15.143	5.3131	2.7696	1.9355	1.9304	9.9059	5.0463		8.736	2.5492	1.5211	1.6001	0.96167	24.124	4.667	2.327		0.86386	1.1425	2.4679	1.4646	2.5336	5.753	2.2279	14.046		3066.2	107.57	416.11	126.16	451.72	517.38	1582.6	1322		5.1356	35.764	30.04	2.9494
140.712	5.8284	0.11956	8.0116	4.4534	2.8782	1.5503	4.9939	10.534		3.0446	15.284	5.1259	3.0822	1.989	2.0121	9.8663	5.09		8.7158	2.4851	1.6495	1.5753	1.0645	23.967	4.651	2.3531		0.89585	1.1531	2.2936	1.4481	2.5983	5.7222	2.1257	14.037		3063	110.5	396.77	133.47	457.69	505.83	1590.8	1314.8		5.0457	35.851	26.793	2.9541
141.231	5.9591	0.11984	8.1805	4.348	2.8395	1.5578	5.2181	10.096		3.0257	15.445	4.9204	3.406	2.0445	2.0879	9.7948	5.1307		8.6553	2.5167	1.7874	1.5487	1.1788	23.706	4.639	2.3946		0.92793	1.1645	2.127	1.4342	2.6548	5.6761	2.0188	14.023		3050.4	113.72	379.87	142.46	462.63	491.36	1591	1301.4		4.9289	35.788	23.792	2.9657
141.75	6.076	0.12019	8.3806	4.2521	2.8055	1.566	5.4356	9.6607		2.9998	15.624	4.7004	3.7364	2.1011	2.1565	9.6927	5.1693		8.5531	2.6393	1.9328	1.5208	1.3041	23.344	4.6326	2.4503		0.95968	1.1767	1.97	1.4224	2.7021	5.6143	1.9092	14.009		3029.5	117.21	365.24	153.07	466.71	474.31	1583.2	1282.6		4.7858	35.563	21.06	2.9849
142.269	6.176	0.1206	8.6033	4.1655	2.7784	1.5751	5.6456	9.2317		2.9674	15.823	4.4697	4.0686	2.1581	2.2169	9.5614	5.2066		8.409	2.8464	2.0834	1.4919	1.4398	22.887	4.633	2.5189		0.99064	1.1895	1.8243	1.4125	2.7395	5.5368	1.7986	13.995		3001.5	120.95	352.64	165.23	470.13	455.1	1567.5	1259.4		4.6176	35.17	18.612	3.0124
142.788	6.2568	0.12108	8.8398	4.0876	2.7603	1.5849	5.8477	8.8128		2.9296	16.037	4.2327	4.3974	2.2147	2.268	9.4025	5.2433		8.224	3.1294	2.237	1.4627	1.585	22.341	4.6413	2.5988		1.0204	1.203	1.6911	1.4039	2.7662	5.4436	1.6889	13.986		2967.5	124.9	341.81	178.83	473.13	434.18	1544.3	1232.8		4.4264	34.604	16.459	3.0485
143.308	6.3166	0.12162	9.0811	4.0179	2.7527	1.5953	6.0419	8.4074		2.8872	16.266	3.9939	4.7177	2.2703	2.309	9.2179	5.2802		7.9998	3.4785	2.3908	1.4337	1.7387	21.714	4.6585	2.6888		1.0485	1.2168	1.5716	1.3965	2.782	5.3352	1.5817	13.982		2928.5	129.01	332.46	193.72	475.92	412.02	1513.9	1204		4.2146	33.869	14.602	3.0935
143.827	6.3543	0.12221	9.3189	3.9556	2.7572	1.6062	6.2282	8.018		2.841	16.506	3.7579	5.0243	2.3242	2.3392	9.0095	5.318		7.7393	3.8824	2.5423	1.4058	1.9	21.011	4.6851	2.7874		1.0747	1.2307	1.4665	1.3898	2.7866	5.2121	1.4787	13.985		2885.5	133.2	324.32	209.74	478.72	389.09	1477	1174.2		3.9852	32.969	13.039	3.1474
144.346	6.3695	0.12284	9.545	3.9001	2.7746	1.6176	6.4066	7.6466		2.792	16.755	3.5289	5.3124	2.3762	2.3582	8.7794	5.3572		7.4461	4.3287	2.6885	1.3798	2.0676	20.242	4.7214	2.8932		1.0985	1.2446	1.3764	1.3836	2.7799	5.0752	1.3813	13.996		2839.2	137.39	317.12	226.68	481.75	365.89	1434.3	1144.3		3.7419	31.918	11.762	3.2101
144.865	6.3626	0.12352	9.7523	3.8506	2.8053	1.6293	6.5774	7.2945		2.7409	17.007	3.3113	5.5774	2.4259	2.3657	8.5298	5.3985		7.1246	4.8044	2.8269	1.3565	2.2402	19.414	4.7677	3.0048		1.1196	1.2581	1.3014	1.3776	2.7621	4.9255	1.2909	14.014		2790.3	141.51	310.63	244.32	485.18	342.88	1386.7	1115.5		3.4883	30.731	10.756	3.2811
145.385	6.3345	0.12423	9.9349	3.8068	2.8493	1.6412	6.7408	6.9623		2.6886	17.261	3.1089	5.8153	2.4733	2.3617	8.2631	5.4421		6.7796	5.296	2.9547	1.3368	2.4165	18.534	4.8236	3.1209		1.1379	1.2708	1.2415	1.3717	2.7334	4.7641	1.2085	14.039		2739.3	145.44	304.64	262.41	489.17	320.51	1335.2	1088.8		3.2285	29.43	10.006	3.3598
145.904	6.2871	0.12496	10.088	3.7681	2.9061	1.6531	6.8967	6.6501		2.6356	17.512	2.9253	6.0226	2.5186	2.3464	7.982	5.4882		6.4164	5.7901	3.0694	1.3216	2.5949	17.61	4.8889	3.2404		1.1531	1.2826	1.1964	1.3655	2.6944	4.5925	1.1352	14.068		2686.6	149.08	299.01	280.67	493.84	299.21	1280.9	1065		2.9669	28.043	9.491	3.4454
146.423	6.2226	0.12571	10.208	3.7347	2.9745	1.6647	7.0451	6.3574		2.5825	17.758	2.7635	6.1967	2.5621	2.3203	7.689	5.537		6.0405	6.2732	3.1688	1.3116	2.774	16.65	4.9631	3.362		1.1651	1.2929	1.1656	1.3589	2.6456	4.412	1.0716	14.1		2632.6	152.34	293.65	298.79	499.26	279.33	1225	1044.7		2.7075	26.599	9.1882	3.5369
146.942	6.144	0.12646	10.293	3.7067	3.0532	1.676	7.1856	6.0832		2.53	17.995	2.6258	6.3357	2.6043	2.2843	7.3869	5.5882		5.6573	6.7326	3.251	1.3075	2.9523	15.66	5.0455	3.4847		1.1739	1.3016	1.1484	1.3518	2.5877	4.2241	1.0182	14.134		2577.4	155.09	288.52	316.46	505.45	261.22	1168.7	1028.6		2.4546	25.132	9.0732	3.6333
147.462	6.0546	0.12721	10.342	3.6848	3.1404	1.6867	7.3179	5.8262		2.4782	18.222	2.5141	6.4386	2.646	2.2394	7.0787	5.6416		5.2724	7.1566	3.3143	1.3099	3.1283	14.648	5.1353	3.6074		1.1793	1.3085	1.1439	1.3439	2.5217	4.0304	0.97547	14.165		2521.1	157.25	283.66	333.36	512.39	245.14	1113.3	1016.9		2.2122	23.676	9.1204	3.7331
147.981	5.9582	0.12794	10.357	3.67	3.2339	1.6966	7.4411	5.5849		2.4276	18.437	2.4295	6.5053	2.688	2.1869	6.7672	5.6965		4.8911	7.5345	3.3575	1.3193	3.3005	13.621	5.2317	3.7291		1.1815	1.3132	1.1512	1.3351	2.4484	3.8324	0.94337	14.192		2463.9	158.72	279.15	349.17	519.98	231.31	1059.9	1009.8		1.9841	22.27	9.3041	3.8349
148.5	5.859	0.12865	10.337	3.6634	3.3314	1.7054	7.5543	5.3577		2.3781	18.64	2.3724	6.5367	2.7313	2.1282	6.4553	5.7522		4.5182	7.8572	3.38	1.3359	3.4678	12.585	5.3337	3.849		1.1806	1.3156	1.1691	1.3254	2.3689	3.6315	0.92186	14.213		2405.6	159.42	275.1	363.56	528.08	219.89	1009.7	1007.2		1.7737	20.95	9.5992	3.9373
149.019	5.7612	0.12933	10.287	3.6668	3.4305	1.7131	7.6565	5.1431		2.3301	18.833	2.3427	6.5343	2.7771	2.0652	6.146	5.8078		4.1584	8.1173	3.3812	1.36	3.6287	11.548	5.4404	3.9661		1.1768	1.3156	1.1964	1.3144	2.2842	3.4293	0.91064	14.225		2346.3	159.29	271.69	376.24	536.51	210.96	963.79	1008.8		1.5842	19.751	9.9817	4.0386
149.538	5.6692	0.12996	10.21	3.6818	3.5287	1.7193	7.7465	4.9398		2.2833	19.016	2.3395	6.5005	2.8267	1.9997	5.842	5.8622		3.8157	8.3091	3.3616	1.3914	3.7822	10.516	5.5507	4.0796		1.1701	1.3132	1.2319	1.3023	2.1955	3.2271	0.90926	14.227		2285.8	158.28	269.11	386.92	545.03	204.57	923.18	1014.4		1.4183	18.71	10.429	4.137
150.058	5.5873	0.13055	10.109	3.7105	3.6236	1.724	7.823	4.7468		2.2378	19.192	2.3614	6.4382	2.8812	1.9337	5.5458	5.9143		3.4938	8.4292	3.3215	1.4298	3.9273	9.4965	5.6638	4.1886		1.161	1.3085	1.2745	1.2888	2.1039	3.0263	0.91712	14.219		2224.2	156.36	267.56	395.37	553.35	200.69	888.71	1023.2		1.2783	17.857	10.922	4.2307
150.577	5.5195	0.13108	9.9897	3.7552	3.713	1.7268	7.8847	4.5633		2.1934	19.366	2.4062	6.351	2.9419	1.8692	5.26	5.9628		3.1956	8.4763	3.2623	1.4749	4.0631	8.4959	5.7785	4.2925		1.1495	1.3014	1.3229	1.274	2.0107	2.8283	0.93348	14.199		2161.3	153.54	267.27	401.37	561.2	199.25	861.09	1034.7		1.1659	17.22	11.442	4.3178
151.096	5.4696	0.13155	9.8565	3.818	3.7947	1.7278	7.9304	4.389		2.1501	19.541	2.4715	6.2424	3.0101	1.8083	4.9866	6.0065		2.9234	8.451	3.1852	1.5259	4.1891	7.5215	5.8939	4.3904		1.1362	1.2921	1.3759	1.2578	1.917	2.6344	0.95748	14.168		2097	149.83	268.43	404.77	568.24	200.14	840.86	1047.9		1.0824	16.823	11.976	4.3964
151.615	5.4406	0.13196	9.7144	3.9013	3.8672	1.7267	7.9588	4.224		2.1076	19.723	2.5544	6.1166	3.0869	1.7529	4.7274	6.0442		2.6792	8.3564	3.0922	1.582	4.3044	6.5808	6.0088	4.4817		1.1211	1.2808	1.4325	1.2404	1.8241	2.4456	0.98819	14.128		2031.4	145.3	271.22	405.46	574.16	203.19	828.38	1062.1		1.0286	16.683	12.513	4.4645
152.135	5.4354	0.1323	9.568	4.007	3.9289	1.7236	7.9689	4.0689		2.0658	19.919	2.6516	5.9773	3.1732	1.7048	4.4838	6.0749		2.4641	8.1975	2.9856	1.6422	4.4086	5.6815	6.1221	4.5658		1.1048	1.2678	1.4916	1.2217	1.7332	2.2631	1.0246	14.079		1964.3	140.01	275.82	403.38	578.65	208.2	823.84	1076.4		1.0049	16.815	13.045	4.5201
152.654	5.4558	0.13257	9.422	4.1373	3.9789	1.7184	7.9596	3.9245		2.0247	20.134	2.7595	5.8285	3.2701	1.6658	4.257	6.0979		2.2787	7.981	2.8676	1.7052	4.5014	4.8315	6.2328	4.6423		1.0875	1.2532	1.5522	1.202	1.6454	2.0881	1.0657	14.025		1895.8	134.09	282.32	398.54	581.42	214.95	827.21	1089.7		1.011	17.222	13.567	4.5611
153.173	5.503	0.13277	9.2805	4.2937	4.0165	1.7111	7.9301	3.792		1.9841	20.377	2.8744	5.6737	3.3781	1.6372	4.0474	6.1128		2.1231	7.7157	2.741	1.7699	4.5823	4.0394	6.3396	4.7107		1.0694	1.2373	1.6136	1.1814	1.5618	1.9215	1.1104	13.967		1825.8	127.66	290.81	390.99	582.22	223.19	838.31	1101.3		1.0464	17.906	14.077	4.5858
153.692	5.5774	0.13289	9.1475	4.4776	4.0415	1.7017	7.8797	3.6728		1.9441	20.656	2.9928	5.5162	3.4978	1.6202	3.8553	6.1192		1.9967	7.4118	2.6086	1.8349	4.6511	3.314	6.4412	4.771		1.051	1.2204	1.6749	1.1601	1.4835	1.7644	1.1577	13.909		1754.4	120.88	301.29	380.85	580.84	232.64	856.75	1110.2		1.1099	18.859	14.578	4.5923
154.212	5.6786	0.13295	9.0263	4.6899	4.0539	1.6905	7.8082	3.5688		1.9047	20.979	3.1108	5.3589	3.6294	1.6156	3.6804	6.1175		1.8986	7.0806	2.473	1.8987	4.7074	2.6644	6.5363	4.823		1.0325	1.2028	1.7354	1.1385	1.4114	1.6175	1.2066	13.853		1681.7	113.93	313.73	368.28	577.11	243.05	881.99	1115.7		1.2	20.066	15.07	4.5789
154.731	5.8053	0.13294	8.9201	4.9312	4.0541	1.6774	7.7153	3.4816		1.8659	21.356	3.2251	5.2041	3.7731	1.624	3.5221	6.1081		1.8274	6.7346	2.337	1.9598	4.7509	2.1002	6.6236	4.8669		1.0141	1.1846	1.7946	1.1167	1.3464	1.4818	1.256	13.802		1607.7	107.01	328.02	353.48	570.96	254.13	913.33	1117		1.3148	21.508	15.559	4.5445
155.25	5.9553	0.13287	8.8314	5.2014	4.0429	1.6628	7.6013	3.4132		1.8279	21.795	3.3323	5.0538	3.9287	1.6455	3.3794	6.092		1.7813	6.3869	2.2033	2.017	4.7815	1.6312	6.7016	4.903		0.99614	1.1661	1.8519	1.0952	1.2892	1.3578	1.305	13.759		1532.5	100.35	344.02	336.71	562.34	265.61	949.94	1113.7		1.4519	23.158	16.051	4.488
155.769	6.1259	0.13274	8.762	5.5	4.021	1.6468	7.4665	3.3654		1.7908	22.308	3.4297	4.9092	4.0957	1.6801	3.2511	6.0704		1.7583	6.051	2.0742	2.0688	4.7988	1.2676	6.769	4.9318		0.97882	1.1476	1.9067	1.0744	1.2403	1.2463	1.3527	13.726		1456.2	94.158	361.49	318.26	551.3	277.21	990.87	1105.2		1.6086	24.985	16.551	4.4089
156.288	6.3133	0.13255	8.7136	5.8257	3.9895	1.6297	7.312	3.3401		1.7549	22.902	3.5145	4.7713	4.2736	1.7271	3.1357	6.0446		1.7563	5.7406	1.9519	2.114	4.8026	1.0195	6.8242	4.9539		0.96234	1.1291	1.9589	1.0545	1.2002	1.1477	1.3985	13.703		1379.1	88.676	380.18	298.43	537.96	288.69	1035.1	1091.2		1.782	26.953	17.065	4.3071
156.808	6.5133	0.13231	8.6871	6.177	3.9495	1.6118	7.1391	3.3389		1.7204	23.589	3.5849	4.6404	4.4615	1.7858	3.0316	6.0162		1.7728	5.4689	1.8384	2.1517	4.7927	0.89715	6.8661	4.9699		0.94688	1.111	2.0079	1.0359	1.169	1.0625	1.4414	13.692		1301.2	84.135	399.76	277.57	522.49	299.81	1081.5	1071.5		1.9687	29.021	17.599	4.1835
157.327	6.7213	0.13202	8.6829	6.5517	3.9023	1.5933	6.9494	3.3633		1.6875	24.376	3.6393	4.5167	4.6583	1.855	2.9369	5.9871		1.8054	5.2486	1.7352	2.1808	4.7689	0.91045	6.8934	4.9808		0.9326	1.0932	2.0535	1.0191	1.147	0.99089	1.481	13.693		1222.9	80.76	419.88	256.01	505.13	310.35	1129.1	1046.2		2.1652	31.148	18.155	4.0391
157.846	6.9321	0.13169	8.7012	6.9468	3.8488	1.5748	6.7454	3.4145		1.6564	25.272	3.6765	4.3998	4.8626	1.9332	2.8502	5.9588		1.8519	5.0916	1.6435	2.2006	4.7311	1.069	6.905	4.9872		0.91964	1.076	2.0955	1.0044	1.134	0.93314	1.5167	13.704		1144.3	78.768	440.14	234.13	486.17	320.12	1176.6	1015.3		2.3678	33.29	18.738	3.8759
158.365	7.1403	0.13132	8.7413	7.3592	3.7902	1.5564	6.5296	3.4935		1.6275	26.284	3.6961	4.2893	5.073	2.0188	2.7697	5.933		1.9099	5.0085	1.5643	2.2106	4.6792	1.3817	6.9002	4.9899		0.90811	1.0594	2.1338	0.99205	1.1297	0.8893	1.5481	13.725		1065.7	78.355	460.14	212.27	465.95	328.95	1222.9	979.11		2.5726	35.403	19.348	3.6966
158.885	7.3405	0.13091	8.8025	7.785	3.7276	1.5386	6.3051	3.6006		1.6009	27.417	3.6981	4.1844	5.2875	2.1098	2.6941	5.9111		1.9775	5.0086	1.4982	2.2106	4.6134	1.8566	6.8784	4.9898		0.89808	1.0435	2.1682	0.98251	1.1338	0.85932	1.5749	13.754		987.56	79.698	479.46	190.78	444.83	336.71	1267	937.95		2.7757	37.445	19.985	3.5046
159.404	7.5274	0.13047	8.8834	8.2201	3.6619	1.5218	6.0754	3.7361		1.5767	28.674	3.6829	4.0844	5.504	2.2043	2.6222	5.8944		2.0527	5.0994	1.4454	2.2005	4.5337	2.5005	6.8392	4.9875		0.88962	1.0284	2.1988	0.97604	1.1457	0.84306	1.5968	13.787		910.1	82.942	497.67	170	423.2	343.28	1307.8	892.35		2.9732	39.374	20.646	3.3038
159.923	7.696	0.12999	8.9826	8.66	3.5938	1.5064	5.844	3.8997		1.5553	30.056	3.6513	3.9887	5.7204	2.3001	2.553	5.8836		2.134	5.2867	1.4057	2.1804	4.4404	3.319	6.7828	4.9836		0.88275	1.014	2.2257	0.97291	1.1646	0.84025	1.6136	13.823		833.76	88.203	514.38	150.26	401.47	348.58	1344.6	842.89		3.1612	41.154	21.327	3.0989
160.442	7.8415	0.12948	9.098	9.1	3.5241	1.4926	5.6149	4.0906		1.5367	31.562	3.6049	3.8966	5.9339	2.395	2.4858	5.8794		2.2202	5.5742	1.3789	2.1507	4.3339	4.3157	6.7093	4.9784		0.87747	1.0006	2.249	0.97335	1.1898	0.85053	1.6255	13.857		758.97	95.557	529.22	131.83	380.02	352.56	1376.3	790.25		3.3361	42.75	22.022	2.895
160.962	7.9598	0.12893	9.2279	9.5352	3.4534	1.4809	5.3919	4.3075		1.5209	33.188	3.5451	3.8079	6.1418	2.4868	2.4203	5.8819		2.3101	5.9636	1.3644	2.1119	4.2149	5.4923	6.6195	4.9722		0.87376	0.98794	2.2689	0.97756	1.2201	0.87343	1.6322	13.888		686.22	105.04	541.83	114.98	359.23	355.19	1402.5	735.18		3.4943	44.136	22.722	2.6976
161.481	8.0476	0.12835	9.3699	9.9608	3.3823	1.4716	5.1788	4.5487		1.5081	34.924	3.4739	3.7224	6.3412	2.5734	2.3564	5.8908		2.4032	6.4544	1.3613	2.0648	4.084	6.8483	6.5144	4.9652		0.87157	0.97622	2.2858	0.98568	1.2548	0.90841	1.6341	13.91		616.01	116.65	551.93	99.949	339.46	356.48	1422.5	678.48		3.6326	45.287	23.421	2.5128
162	8.1022	0.12773	9.522	10.372	3.3112	1.4648	4.9792	4.8121		1.4982	36.758	3.3936	3.6402	6.5287	2.6529	2.2945	5.9055		2.4991	7.0442	1.3688	2.0103	3.9422	8.3805	6.3953	4.9572		0.87081	0.9654	2.3	0.99781	1.2925	0.95482	1.6312	13.923		548.88	130.33	559.27	86.926	321	356.46	1435.9	620.97		3.7483	46.186	24.106	2.3464
162.519	8.1218	0.12708	9.6818	10.764	3.2407	1.461	4.7965	5.0949		1.4911	38.677	3.3066	3.5617	6.7013	2.7233	2.2351	5.9248		2.5976	7.728	1.3857	1.9493	3.7905	10.083	6.2639	4.9479		0.87137	0.95549	2.3119	1.014	1.3321	1.012	1.6237	13.923		485.41	145.98	563.69	76.068	304.13	355.17	1442.4	563.49		3.8389	46.822	24.77	2.2046
163.038	8.1055	0.12639	9.8471	11.133	3.1712	1.4602	4.6335	5.3941		1.4867	40.659	3.2153	3.4874	6.8555	2.7832	2.1789	5.9474		2.6988	8.4994	1.411	1.883	3.6302	11.948	6.122	4.9369		0.87313	0.94648	2.3219	1.0341	1.3725	1.0791	1.6119	13.908		426.16	163.47	565.07	67.492	289.06	352.69	1442	506.89		3.9025	47.19	25.399	2.0934
163.558	8.0532	0.12566	10.015	11.475	3.1032	1.4625	4.4926	5.7064		1.4849	42.681	3.1223	3.4184	6.9881	2.8312	2.127	5.9715		2.8031	9.3496	1.4435	1.8126	3.4626	13.963	5.9718	4.9236		0.87592	0.93837	2.3305	1.0581	1.4125	1.1554	1.5961	13.879		371.73	182.61	563.37	61.277	275.96	349.1	1434.7	451.96		3.9379	47.29	25.985	2.0187
164.077	7.9658	0.1249	10.185	11.787	3.0375	1.4681	4.3758	6.0279		1.4854	44.719	3.0302	3.3558	7.0961	2.8661	2.0806	5.9951		2.9112	10.268	1.482	1.7392	3.2891	16.114	5.8156	4.9072		0.87957	0.93113	2.3382	1.0859	1.451	1.24	1.5766	13.833		322.7	203.19	558.64	57.458	264.93	344.51	1420.7	399.48		3.9443	47.128	26.517	1.9859
164.596	7.8448	0.12411	10.352	12.064	2.9746	1.4769	4.2844	6.3549		1.4881	46.741	2.9414	3.3007	7.1765	2.8873	2.0412	6.016		3.0237	11.244	1.5255	1.6643	3.1115	18.383	5.6559	4.887		0.88386	0.92474	2.3452	1.117	1.4869	1.332	1.5538	13.772		279.62	224.92	550.98	56.034	256.01	339.03	1400.2	350.18		3.9215	46.715	26.985	1.9999
165.115	7.6926	0.12329	10.516	12.306	2.9153	1.4889	4.219	6.6832		1.4927	48.717	2.8584	3.2546	7.227	2.8943	2.0104	6.0319		3.1414	12.264	1.5728	1.5891	2.9312	20.751	5.4953	4.8621		0.88859	0.91916	2.3519	1.1513	1.5192	1.4304	1.528	13.697		243.04	247.54	540.57	56.961	249.19	332.8	1373.8	304.7		3.87	46.065	27.379	2.0653
165.635	7.512	0.12245	10.674	12.51	2.8607	1.5039	4.1796	7.009		1.499	50.613	2.7832	3.2189	7.2455	2.887	1.9896	6.0406		3.2654	13.314	1.623	1.5147	2.75	23.194	5.3364	4.8318		0.89353	0.91432	2.3587	1.1884	1.5471	1.5344	1.4995	13.61		213.43	270.7	527.67	60.162	244.4	325.94	1341.9	263.62		3.7909	45.199	27.692	2.1856
166.154	7.3062	0.12159	10.824	12.674	2.8115	1.5217	4.1657	7.3283		1.5067	52.395	2.7178	3.195	7.2306	2.8656	1.9808	6.0396		3.3965	14.379	1.6752	1.4425	2.5695	25.688	5.1816	4.7952		0.89844	0.91017	2.3658	1.2277	1.5698	1.6429	1.4688	13.513		191.24	294.08	512.57	65.52	241.53	318.61	1305.2	227.45		3.6859	44.139	27.915	2.3637
166.673	7.079	0.12073	10.962	12.799	2.769	1.5419	4.1761	7.6373		1.5156	54.029	2.6639	3.1842	7.1817	2.8306	1.9855	6.027		3.5357	15.445	1.7285	1.3736	2.3915	28.207	5.0334	4.752		0.90312	0.90661	2.3733	1.2688	1.5867	1.7549	1.4362	13.41		176.81	317.31	495.64	72.888	240.42	310.96	1264.5	196.58		3.5573	42.912	28.043	2.6018
167.192	6.8341	0.11987	11.088	12.884	2.7341	1.5644	4.2091	7.9328		1.5254	55.483	2.6228	3.1877	7.0988	2.7829	2.0054	6.0008		3.684	16.498	1.7822	1.3091	2.2174	30.722	4.894	4.7017		0.90735	0.90355	2.3812	1.3111	1.5972	1.8694	1.4021	13.303		170.44	340.03	477.28	82.083	240.88	303.13	1220.5	171.33		3.4078	41.547	28.07	2.9009
167.712	6.5755	0.11902	11.198	12.931	2.708	1.5885	4.2625	8.2117		1.5358	56.725	2.5957	3.2065	6.9829	2.7235	2.0423	5.9596		3.8423	17.522	1.8355	1.2499	2.049	33.206	4.7654	4.6444		0.91095	0.90087	2.3895	1.3541	1.6013	1.9854	1.3669	13.195		172.29	361.87	457.92	92.899	242.69	295.3	1174	151.92		3.2405	40.074	27.991	3.2613
168.231	6.307	0.1182	11.292	12.939	2.6917	1.614	4.3337	8.4716		1.5467	57.728	2.5832	3.2412	6.8354	2.6536	2.0976	5.9024		4.0113	18.504	1.8878	1.197	1.8876	35.629	4.6494	4.5804		0.91379	0.89845	2.398	1.397	1.5985	2.1018	1.3309	13.09		182.45	382.48	438.01	105.1	245.64	287.6	1125.9	138.48		3.0591	38.524	27.802	3.6823
168.75	6.0324	0.11741	11.367	12.912	2.686	1.6403	4.4196	8.7109		1.5579	58.467	2.586	3.2925	6.6589	2.5749	2.1726	5.8285		4.1917	19.431	1.9384	1.1512	1.7348	37.963	4.5476	4.5105		0.91576	0.89615	2.4065	1.4393	1.589	2.2176	1.2946	12.991		200.89	401.52	418.02	118.43	249.47	280.21	1077	131.02		2.8672	36.93	27.501	4.1621
169.269	5.7554	0.11666	11.423	12.852	2.6919	1.6669	4.5173	8.9282		1.5692	58.923	2.6041	3.3603	6.4564	2.489	2.2686	5.738		4.3843	20.291	1.9868	1.1131	1.5917	40.182	4.4612	4.4361		0.91681	0.89385	2.4147	1.4804	1.573	2.3317	1.2584	12.898		227.44	418.67	398.39	132.62	253.96	273.28	1028.1	129.5		2.6689	35.324	27.087	4.6984
169.788	5.4793	0.11597	11.459	12.762	2.7096	1.6933	4.6231	9.1233		1.5803	59.082	2.6374	3.4443	6.2315	2.3977	2.3863	5.6315		4.5894	21.072	2.0323	1.0834	1.4597	42.259	4.391	4.3591		0.91693	0.89142	2.4221	1.5197	1.5509	2.4428	1.2227	12.813		261.82	433.65	379.58	147.38	258.88	266.96	979.96	133.75		2.4681	33.737	26.561	5.2877
170.308	5.2073	0.11534	11.473	12.645	2.7396	1.719	4.7339	9.2965		1.5912	58.936	2.6857	3.5439	5.9883	2.3029	2.5265	5.5103		4.8074	21.767	2.0743	1.0626	1.3399	44.17	4.3377	4.2818		0.91618	0.88877	2.4282	1.5565	1.523	2.5499	1.1879	12.738		303.63	446.21	362.01	162.41	264.05	261.38	933.19	143.55		2.2688	32.199	25.925	5.926
170.827	4.9424	0.11477	11.467	12.504	2.7817	1.7434	4.8461	9.4488		1.6016	58.485	2.7483	3.6581	5.7313	2.2064	2.6895	5.3762		5.0385	22.365	2.1121	1.0511	1.233	45.895	4.3016	4.2074		0.91465	0.8858	2.4324	1.5903	1.4901	2.6517	1.1545	12.671		352.34	456.15	346.06	177.42	269.28	256.7	888.42	158.57		2.0748	30.736	25.183	6.6084
171.346	4.6871	0.11427	11.441	12.345	2.8353	1.7661	4.9567	9.5818		1.6114	57.735	2.8244	3.7852	5.4651	2.1101	2.8751	5.2317		5.283	22.862	2.1452	1.0491	1.1401	47.414	4.2829	4.1394		0.91251	0.88245	2.4341	1.6205	1.453	2.7471	1.123	12.612		407.29	463.33	332.1	192.11	274.44	253.04	846.12	178.44		1.8898	29.374	24.339	7.3296
171.865	4.4439	0.11385	11.395	12.171	2.8996	1.7867	5.0627	9.6979		1.6204	56.697	2.913	3.9235	5.1944	2.0161	3.0831	5.0798		5.5407	23.251	2.1729	1.057	1.0618	48.71	4.2814	4.0818		0.90995	0.87869	2.4326	1.6466	1.4124	2.8349	1.0938	12.558		467.71	467.66	320.41	206.2	279.43	250.5	806.68	202.69		1.7171	28.133	23.403	8.0836
172.385	4.2146	0.1135	11.331	11.985	2.9733	1.8048	5.1615	9.7994		1.6286	55.392	3.0131	4.0705	4.9236	1.926	3.3127	4.9237		5.8114	23.529	2.1946	1.0749	0.99866	49.772	4.2967	4.0392		0.90718	0.87452	2.4273	1.6682	1.3694	2.9138	1.0675	12.507		532.74	469.09	311.26	219.4	284.18	249.18	770.34	230.82		1.5598	27.03	22.381	8.8644
172.904	4.0012	0.11323	11.251	11.793	3.0547	1.8201	5.2508	9.8894		1.6357	53.845	3.1233	4.2238	4.6571	1.8415	3.5628	4.7672		6.0948	23.694	2.2097	1.1029	0.95101	50.591	4.3283	4.0164		0.90444	0.86997	2.4175	1.6848	1.325	2.9828	1.0446	12.456		601.4	467.67	304.84	231.49	288.65	249.16	737.27	262.24		1.4203	26.078	21.287	9.6654
173.423	3.8049	0.11304	11.155	11.598	3.1415	1.8323	5.3289	9.9708		1.6418	52.085	3.2422	4.3805	4.3987	1.7643	3.832	4.6141		6.3905	23.744	2.2178	1.1411	0.91912	51.16	4.3756	4.0183		0.902	0.86512	2.4024	1.6962	1.28	3.0407	1.0256	12.401		672.68	463.49	301.3	242.22	292.87	250.5	707.5	296.36		1.301	25.286	20.13	10.48
173.942	3.627	0.11291	11.047	11.404	3.2313	1.8413	5.3945	10.046		1.6467	50.148	3.3684	4.5375	4.152	1.6957	4.1185	4.4683		6.6977	23.682	2.2184	1.1893	0.90307	51.479	4.4379	4.0499		0.9001	0.86006	2.3817	1.7021	1.2355	3.0866	1.0109	12.339		745.47	456.69	300.71	251.41	296.88	253.23	680.97	332.51		1.2034	24.66	18.924	11.301
174.462	3.4681	0.11286	10.928	11.214	3.3214	1.847	5.4466	10.119		1.6503	48.072	3.5004	4.6916	3.9197	1.6371	4.4203	4.3337		7.0154	23.508	2.2112	1.2474	0.90275	51.551	4.5142	4.1161		0.89899	0.85492	2.3548	1.7022	1.1924	3.1196	1.001	12.266		818.68	447.48	303.11	258.91	300.73	257.35	657.54	370.02		1.1288	24.199	17.682	12.121
174.981	3.3289	0.11287	10.801	11.032	3.4086	1.8494	5.4848	10.19		1.6527	45.896	3.6367	4.8396	3.7042	1.5895	4.7351	4.2139		7.3424	23.226	2.1961	1.3153	0.91789	51.385	4.6036	4.2212		0.89887	0.84983	2.3213	1.6966	1.1517	3.1391	0.99623	12.18		891.18	436.12	308.45	264.61	304.53	262.85	636.97	408.2		1.0777	23.901	16.417	12.934
175.5	3.2095	0.11294	10.668	10.86	3.49	1.8485	5.5092	10.263		1.654	43.663	3.7757	4.9782	3.507	1.5538	5.0603	4.112		7.6773	22.842	2.173	1.3926	0.94804	50.993	4.705	4.3693		0.89993	0.84496	2.2809	1.6853	1.1141	3.1444	0.99698	12.078		961.88	422.93	316.66	268.45	308.38	269.67	618.98	446.35		1.0504	23.759	15.144	13.733
176.019	3.1097	0.11307	10.532	10.702	3.5623	1.8445	5.5198	10.337		1.6541	41.414	3.9159	5.1046	3.329	1.5305	5.3934	4.0309		8.0181	22.364	2.1422	1.4789	0.99255	50.393	4.8173	4.5638		0.90234	0.84047	2.2337	1.6683	1.0804	3.1354	1.0035	11.958		1029.8	408.23	327.59	270.4	312.42	277.73	603.24	483.77		1.0465	23.766	13.876	14.51
176.538	3.0291	0.11324	10.396	10.557	3.6224	1.8376	5.5174	10.413		1.6533	39.189	4.0557	5.216	3.1706	1.5203	5.7315	3.9728		8.3627	21.8	2.1039	1.5738	1.0506	49.609	4.9391	4.8072		0.90618	0.83651	2.1797	1.646	1.0512	3.1118	1.016	11.819		1093.8	392.41	341.06	270.5	316.76	286.95	589.4	519.79		1.0653	23.908	12.624	15.259
177.058	2.9671	0.11347	10.262	10.428	3.6677	1.8282	5.5028	10.49		1.6519	37.028	4.1937	5.3099	3.0314	1.5232	6.0718	3.9395		8.7086	21.161	2.0588	1.6767	1.1211	48.666	5.0692	5.1012		0.91154	0.83322	2.1192	1.6186	1.027	3.0739	1.0345	11.662		1153.2	375.86	356.85	268.82	321.53	297.17	577.08	553.76		1.1055	24.174	11.402	15.973
177.577	2.9228	0.11373	10.132	10.316	3.6955	1.8164	5.4769	10.568		1.6501	34.967	4.3283	5.3846	2.9106	1.5391	6.4115	3.9317		9.0528	20.461	2.0075	1.7868	1.203	47.594	5.2061	5.4463		0.91842	0.83073	2.0526	1.5866	1.0082	3.0221	1.0591	11.488		1207.3	358.97	374.69	265.49	326.85	308.27	565.93	585.09		1.1655	24.548	10.218	16.644
178.096	2.8952	0.11403	10.01	10.221	3.7039	1.8027	5.4408	10.644		1.6485	33.038	4.458	5.4385	2.8068	1.5677	6.7476	3.9498		9.3921	19.713	1.9508	1.9034	1.2948	46.428	5.3482	5.842		0.92679	0.82916	1.9804	1.5505	0.99517	2.9569	1.0896	11.299		1255.4	342.14	394.29	260.66	332.84	320.05	555.62	613.23		1.2433	25.017	9.0834	17.267
178.615	2.883	0.11436	9.8977	10.141	3.6914	1.7875	5.3958	10.717		1.6475	31.27	4.5815	5.4708	2.7183	1.6085	7.0774	3.9933		9.723	18.935	1.8899	2.0255	1.3951	45.201	5.4941	6.2867		0.93658	0.82858	1.9036	1.5111	0.98798	2.8793	1.1259	11.101		1297	325.77	415.32	254.53	339.59	332.35	545.84	637.68		1.3367	25.566	8.0057	17.835
179.135	2.885	0.11472	9.7972	10.077	3.6571	1.7711	5.3429	10.782		1.6478	29.687	4.6971	5.4813	2.6432	1.6605	7.3981	4.0609		10.042	18.145	1.8257	2.1521	1.502	43.949	5.642	6.7775		0.94764	0.82906	1.8229	1.4689	0.9867	2.7904	1.1675	10.897		1332.1	310.21	437.46	247.32	347.18	344.98	536.33	658.04		1.4432	26.183	6.992	18.341
179.654	2.8999	0.1151	9.7107	10.028	3.6007	1.7541	5.2833	10.837		1.6501	28.308	4.8036	5.4703	2.5791	1.7227	7.7074	4.1507		10.344	17.36	1.7594	2.282	1.6139	42.707	5.7904	7.3104		0.9598	0.83063	1.7395	1.4248	0.99125	2.6916	1.2141	10.692		1360.4	295.81	460.33	239.29	355.67	357.72	526.87	673.97		1.5601	26.854	6.0476	18.78
180.173	2.9262	0.1155	9.6398	9.9918	3.523	1.7369	5.2182	10.879		1.6551	27.146	4.8994	5.4386	2.5239	1.7938	8.0027	4.2604		10.627	16.6	1.6924	2.414	1.7288	41.509	5.9376	7.8801		0.97285	0.8333	1.6545	1.3796	1.0014	2.5845	1.2652	10.494		1382.1	282.85	483.58	230.7	365.11	370.41	517.3	685.23		1.6846	27.57	5.1768	19.147
180.692	2.9625	0.11591	9.5859	9.9668	3.425	1.7197	5.1486	10.903		1.6637	26.211	4.9831	5.3877	2.4751	1.8722	8.282	4.387		10.886	15.886	1.6257	2.5467	1.8448	40.385	6.082	8.4805		0.98652	0.83706	1.569	1.3341	1.017	2.4708	1.3199	10.309		1397.5	271.59	506.84	221.82	375.52	382.86	507.51	691.64		1.814	28.322	4.3824	19.438
181.212	3.0076	0.11632	9.5497	9.9513	3.3089	1.703	5.0755	10.908		1.6768	25.504	5.0534	5.3194	2.4306	1.9561	8.5431	4.5271		11.116	15.234	1.5606	2.6788	1.9597	39.364	6.2222	9.1042		1.0005	0.84189	1.4844	1.2892	1.0375	2.3525	1.3777	10.143		1407.1	262.21	529.73	212.91	386.91	394.91	497.44	693.13		1.9454	29.106	3.6658	19.648
181.731	3.0602	0.11674	9.5316	9.9434	3.1772	1.6872	4.9999	10.89		1.6952	25.026	5.1087	5.2359	2.3882	2.0438	8.7843	4.6771		11.315	14.664	1.4983	2.8088	2.0717	38.47	6.3565	9.7432		1.0145	0.84774	1.4018	1.2458	1.0624	2.2316	1.4376	10.003		1411.4	254.87	551.89	204.26	399.25	406.42	487.09	689.71		2.0761	29.918	3.0274	19.777
182.25	3.119	0.11715	9.5313	9.941	3.0332	1.6724	4.9227	10.846		1.7198	24.768	5.148	5.1397	2.346	2.1332	9.004	4.8332		11.479	14.193	1.4399	2.9353	2.1787	37.722	6.4837	10.389		1.0282	0.85456	1.3226	1.2045	1.0913	2.1104	1.4989	9.8947		1411.2	249.64	572.95	196.1	412.51	417.3	476.49	681.49		2.2035	30.755	2.4665	19.821
182.769	3.183	0.11755	9.5481	9.9421	2.8806	1.659	4.8448	10.776		1.7514	24.721	5.1699	5.0336	2.3024	2.2223	9.2007	4.9917		11.604	13.834	1.3862	3.0567	2.2788	37.134	6.6024	11.031		1.0412	0.86227	1.2479	1.1661	1.1235	1.991	1.5604	9.823		1407.3	246.54	592.59	188.66	426.63	427.48	465.7	668.63		2.3252	31.62	1.981	19.782
183.288	3.2512	0.11793	9.5805	9.9446	2.7235	1.6471	4.7672	10.678		1.7908	24.871	5.1735	4.9205	2.2559	2.3091	9.3733	5.149		11.689	13.6	1.3381	3.1716	2.3702	36.714	6.7114	11.66		1.0533	0.87081	1.1788	1.1312	1.1582	1.8756	1.6214	9.7918		1400.8	245.54	610.47	182.15	441.55	436.92	454.85	651.39		2.4391	32.513	1.5684	19.661
183.808	3.323	0.11828	9.6267	9.9465	2.5663	1.6368	4.6909	10.553		1.8386	25.199	5.158	4.8031	2.2056	2.3916	9.5207	5.3015		11.731	13.5	1.2962	3.2784	2.4513	36.467	6.8096	12.267		1.0639	0.88007	1.1163	1.1004	1.1947	1.7665	1.6808	9.8039		1392.6	246.54	626.28	176.74	457.16	445.64	444.03	630.09		2.5435	33.437	1.2253	19.46
184.327	3.3976	0.11861	9.6846	9.9457	2.4133	1.6282	4.6168	10.401		1.8953	25.684	5.1229	4.6844	2.1507	2.4679	9.6418	5.4462		11.73	13.543	1.261	3.3757	2.5206	36.39	6.896	12.841		1.0729	0.88997	1.0613	1.0739	1.2323	1.6655	1.7376	9.8604		1383.8	249.4	639.76	172.56	473.37	453.68	433.41	605.09		2.6369	34.395	0.94739	19.184
184.846	3.4748	0.11891	9.7515	9.9403	2.269	1.6213	4.5461	10.225		1.9614	26.305	5.0677	4.5671	2.0908	2.5364	9.736	5.5801		11.683	13.73	1.2328	3.462	2.5769	36.476	6.9698	13.372		1.0799	0.90041	1.0145	1.0521	1.2701	1.5747	1.791	9.9611		1375.5	253.94	650.66	169.71	490.05	461.15	423.12	576.84		2.7183	35.39	0.73028	18.838
185.365	3.5543	0.11918	9.8244	9.9283	2.1377	1.6161	4.48	10.029		2.037	27.035	4.9926	4.4535	2.0257	2.5953	9.8026	5.7009		11.592	14.064	1.2116	3.5362	2.6191	36.713	7.0303	13.851		1.0848	0.91127	0.97628	1.0351	1.3073	1.4958	1.8401	10.104		1368.7	259.92	658.77	168.24	507.04	468.16	413.31	545.78		2.7872	36.423	0.56903	18.431
185.885	3.6361	0.11941	9.9005	9.9078	2.0234	1.6123	4.4197	9.817		2.122	27.85	4.898	4.3461	1.9556	2.6435	9.8411	5.8067		11.458	14.539	1.1974	3.5971	2.6465	37.084	7.0766	14.271		1.0872	0.92245	0.94709	1.0228	1.3432	1.4301	1.8841	10.287		1364.5	267.09	663.9	168.19	524.21	474.87	404.12	512.41		2.8434	37.494	0.45849	17.97
186.404	3.7204	0.1196	9.9765	9.8766	1.9295	1.61	4.3667	9.5944		2.2162	28.723	4.7846	4.2467	1.881	2.6798	9.851	5.8959		11.283	15.15	1.19	3.6435	2.6587	37.57	7.1084	14.622		1.0871	0.93382	0.92701	1.0154	1.377	1.3789	1.9222	10.505		1363.6	275.16	665.93	169.54	541.37	481.46	395.69	477.24		2.8874	38.602	0.39342	17.464
186.923	3.8074	0.11976	10.049	9.8329	1.8593	1.609	4.3224	9.3681		2.3191	29.626	4.6537	4.1571	1.8028	2.7036	9.8321	5.9675		11.069	15.887	1.1888	3.6745	2.6555	38.147	7.125	14.898		1.0844	0.94527	0.91597	1.0124	1.408	1.343	1.954	10.753		1366.8	283.84	664.76	172.25	558.34	488.12	388.12	440.8		2.9199	39.744	0.36852	16.924
187.442	3.8976	0.11989	10.116	9.7746	1.8151	1.6089	4.2881	9.1458		2.4299	30.532	4.5068	4.0785	1.7218	2.7144	9.7841	6.0208		10.82	16.737	1.1934	3.6895	2.6369	38.788	7.1261	15.095		1.079	0.95668	0.91368	1.0136	1.4356	1.3231	1.9789	11.024		1374.8	292.81	660.36	176.22	574.93	495.05	381.52	403.6		2.9422	40.913	0.37859	16.36
187.962	3.9912	0.11998	10.173	9.6996	1.7987	1.6097	4.2653	8.9361		2.5475	31.416	4.3459	4.0118	1.6392	2.7122	9.7071	6.0554		10.541	17.682	1.2029	3.688	2.6033	39.465	7.1116	15.207		1.0709	0.96794	0.91965	1.0187	1.4593	1.3193	1.9966	11.31		1387.9	301.75	652.72	181.36	590.92	502.43	375.97	366.16		2.9557	42.104	0.41856	15.782
188.481	4.0888	0.12005	10.218	9.6059	1.8111	1.611	4.2553	8.748		2.6706	32.251	4.1732	3.9577	1.5564	2.6973	9.6011	6.0716		10.237	18.705	1.2167	3.6697	2.5553	40.149	7.0812	15.233		1.0603	0.97896	0.93322	1.0272	1.4786	1.3316	2.0069	11.606		1406.4	310.38	641.92	187.53	606.11	510.44	371.5	328.95		2.9626	43.305	0.48357	15.2
189	4.1908	0.12009	10.248	9.4916	1.8526	1.6126	4.2595	8.591		2.7977	33.014	3.9914	3.9162	1.4749	2.6701	9.4665	6.0696		9.9136	19.784	1.2339	3.6346	2.4937	40.811	7.0351	15.17		1.0472	0.98964	0.95357	1.0387	1.4933	1.3597	2.0098	11.903		1430.4	318.4	628.07	194.58	620.28	519.23	368.15	292.45		2.965	44.506	0.56905	14.626
189.519	4.2972	0.12011	10.261	9.3548	1.9226	1.6144	4.2788	8.4747		2.9269	33.682	3.8035	3.8874	1.3962	2.6315	9.3037	6.0502		9.5772	20.897	1.2534	3.5829	2.4195	41.421	6.9737	15.02		1.0318	0.99992	0.97974	1.0526	1.5031	1.4026	2.0054	12.195		1459.7	325.54	611.33	202.35	633.2	528.92	365.91	257.08		2.9653	45.695	0.67071	14.066
190.038	4.4083	0.12012	10.255	9.1942	2.0198	1.616	4.3141	8.4087		3.0563	34.237	3.6126	3.8707	1.3219	2.5827	9.1133	6.0141		9.2345	22.019	1.2745	3.5152	2.3338	41.951	6.8973	14.784		1.0144	1.0097	1.0107	1.0687	1.5082	1.4596	1.994	12.474		1494	331.56	591.92	210.66	644.67	539.58	364.75	223.24		2.9662	46.859	0.78466	13.531
190.558	4.5241	0.12012	10.228	9.0083	2.1421	1.6174	4.3662	8.4019		3.1837	34.661	3.4221	3.8652	1.2538	2.5249	8.8963	5.9625		8.8928	23.125	1.2961	3.4322	2.2381	42.376	6.8067	14.466		0.99507	1.0191	1.0452	1.0864	1.5085	1.5292	1.9761	12.736		1532.8	336.25	570.12	219.33	654.47	551.25	364.61	191.27		2.9701	47.985	0.90734	13.026
191.077	4.6442	0.12012	10.18	8.7963	2.2868	1.6182	4.4354	8.4629		3.3069	34.94	3.2356	3.8699	1.1933	2.4597	8.6539	5.8966		8.5592	24.192	1.3173	3.3351	2.1337	42.671	6.7031	14.069		0.9742	1.0278	1.0822	1.1053	1.5044	1.6099	1.9523	12.975		1575.5	339.46	546.21	228.18	662.4	563.91	365.4	161.47		2.9798	49.06	1.0356	12.557
191.596	4.7683	0.12011	10.109	8.5578	2.4502	1.6185	4.5217	8.599		3.4236	35.064	3.0566	3.8836	1.1421	2.3887	8.3875	5.8177		8.2409	25.193	1.3372	3.2251	2.0222	42.817	6.5876	13.601		0.95203	1.0361	1.1205	1.125	1.4963	1.7002	1.9233	13.188		1621.2	341.04	520.55	237.03	668.27	577.5	367.03	134.1		2.9977	50.073	1.1668	12.129
192.115	4.8957	0.12011	10.017	8.2932	2.6285	1.618	4.6249	8.8163		3.5314	35.027	2.8887	3.9047	1.1015	2.3135	8.0988	5.7273		7.9449	26.107	1.3549	3.1036	1.9052	42.798	6.4617	13.067		0.92884	1.0438	1.1589	1.1453	1.4847	1.798	1.89	13.374		1669.2	340.9	493.5	245.69	671.91	591.91	369.36	109.35		3.0261	51.012	1.2984	11.743
192.635	5.0256	0.12012	9.9031	8.0031	2.8171	1.6167	4.7445	9.1197		3.6282	34.824	2.7355	3.9317	1.0729	2.2358	7.79	5.6269		7.6778	26.912	1.3699	2.9725	1.7844	42.6	6.3271	12.477		0.90493	1.0509	1.1963	1.1659	1.4703	1.9013	1.8532	13.529		1718.3	339.01	465.46	254	673.18	607	372.25	87.387		3.0668	51.87	1.4287	11.402
193.154	5.1572	0.12014	9.7698	7.6891	3.0112	1.6146	4.8795	9.512		3.712	34.458	2.6003	3.9628	1.0573	2.1573	7.4632	5.5181		7.4459	27.588	1.3813	2.8334	1.6616	42.218	6.1855	11.839		0.88059	1.0575	1.2317	1.1864	1.4538	2.0082	1.8142	13.656		1767.5	335.36	436.82	261.81	671.96	622.58	375.52	68.312		3.1214	52.639	1.5559	11.104
193.673	5.2894	0.12018	9.6194	7.3535	3.2057	1.6116	5.0289	9.9945		3.7809	33.932	2.4863	3.9963	1.0557	2.0794	7.1211	5.4024		7.2547	28.118	1.3887	2.6883	1.5385	41.649	6.0389	11.163		0.85609	1.0635	1.2643	1.2068	1.4361	2.1165	1.7738	13.756		1815.8	329.99	408.01	268.98	668.14	638.45	379.02	52.194		3.1912	53.315	1.6791	10.848
194.192	5.421	0.12022	9.4548	6.9989	3.3955	1.6079	5.1912	10.566		3.8334	33.254	2.3965	4.0305	1.0686	2.0036	6.7666	5.2815		7.1092	28.489	1.3917	2.5393	1.4169	40.895	5.8891	10.459		0.83171	1.0689	1.2931	1.2269	1.418	2.2241	1.7331	13.829		1862	322.97	379.44	275.39	661.68	654.36	382.57	39.057		3.2766	53.895	1.7972	10.632
194.712	5.5509	0.12029	9.2797	6.6289	3.5755	1.6035	5.3649	11.224		3.8685	32.435	2.3334	4.0637	1.0966	1.9311	6.4027	5.157		7.0133	28.691	1.39	2.3884	1.2985	39.964	5.738	9.7382		0.8077	1.0737	1.3177	1.2464	1.4004	2.329	1.6932	13.88		1905.1	314.42	351.51	280.92	652.56	670.08	385.98	28.889		3.3777	54.378	1.9098	10.452
195.231	5.6779	0.12037	9.0984	6.2476	3.7409	1.5985	5.5483	11.962		3.8854	31.49	2.2995	4.0942	1.1398	1.8629	6.0329	5.0305		6.9699	28.717	1.3836	2.2377	1.185	38.867	5.5874	9.01		0.78433	1.0776	1.3376	1.2654	1.3844	2.4293	1.6551	13.912		1944.1	304.47	324.62	285.48	640.79	685.34	389.06	21.646		3.4939	54.765	2.0167	10.303
195.75	5.8008	0.12047	8.9155	5.8592	3.8873	1.5931	5.7395	12.774		3.8839	30.433	2.2965	4.1206	1.198	1.8	5.6604	4.9034		6.9807	28.563	1.3724	2.0891	1.0782	37.623	5.439	8.2856		0.76181	1.0808	1.3522	1.2836	1.3708	2.5231	1.6197	13.929		1978.1	293.3	299.12	289.02	626.43	699.92	391.63	17.256		3.6241	55.059	2.1179	10.181
196.269	5.9182	0.12059	8.7356	5.4687	4.0108	1.5872	5.9365	13.649		3.8642	29.283	2.3258	4.1415	1.2709	1.7427	5.2889	4.7772		7.0462	28.231	1.3566	1.9448	0.9798	36.25	5.2945	7.575		0.74039	1.0829	1.3616	1.3012	1.3604	2.6089	1.5879	13.934		2006.1	281.09	275.34	291.47	609.59	713.56	393.52	15.621		3.7665	55.264	2.2137	10.079
196.788	6.0292	0.12073	8.5638	5.081	4.1081	1.5813	6.1376	14.576		3.8271	28.057	2.3883	4.1555	1.3578	1.6917	4.9218	4.6532		7.1657	27.726	1.3366	1.8066	0.89139	34.775	5.1552	6.8881		0.72026	1.0837	1.3655	1.3181	1.3542	2.6851	1.5603	13.932		2027.5	268.04	253.59	292.8	590.42	726.04	394.56	16.626		3.9187	55.385	2.3047	9.9928
197.308	6.1326	0.1209	8.4046	4.7011	4.1766	1.5753	6.3406	15.541		3.7736	26.775	2.4844	4.1616	1.4576	1.6469	4.5627	4.5328		7.337	27.055	1.3127	1.6763	0.8146	33.223	5.0225	6.234		0.70162	1.0832	1.3641	1.3343	1.3527	2.7506	1.5375	13.925		2041.7	254.37	234.11	293.01	569.11	737.17	394.59	20.137		4.078	55.427	2.3916	9.9155
197.827	6.2273	0.12108	8.2627	4.334	4.2146	1.5694	6.5437	16.528		3.7053	25.456	2.6138	4.1589	1.5693	1.6084	4.2148	4.4171		7.5566	26.23	1.2856	1.5554	0.75096	31.625	4.8976	5.621		0.68466	1.081	1.3575	1.3499	1.3568	2.8043	1.52	13.916		2048.2	240.28	217.1	292.08	545.88	746.76	393.45	26.009		4.241	55.397	2.4752	9.8417
198.346	6.3124	0.1213	8.1419	3.9845	4.2214	1.5639	6.7449	17.521		3.6241	24.117	2.7757	4.1465	1.6914	1.5759	3.8813	4.3071		7.8195	25.267	1.2559	1.4455	0.70197	30.012	4.7814	5.0567		0.66953	1.0768	1.346	1.3649	1.3668	2.8454	1.5081	13.909		2046.7	225.99	202.71	290.04	521.02	754.67	391.04	34.09		4.4043	55.301	2.5565	9.7661
198.865	6.3873	0.12155	8.0456	3.657	4.1971	1.5589	6.9422	18.502		3.5323	22.777	2.9687	4.1238	1.8221	1.549	3.5652	4.2036		8.1197	24.182	1.2244	1.3478	0.66902	28.415	4.675	4.5474		0.65639	1.0705	1.3299	1.3794	1.3832	2.8734	1.5019	13.904		2037.1	211.7	191.03	286.92	494.83	760.77	387.24	44.219		4.5638	55.147	2.6368	9.6838
199.385	6.4511	0.12184	7.9767	3.3555	4.1426	1.5546	7.1337	19.453		3.4321	21.452	3.1906	4.0905	1.9598	1.5273	3.269	4.1073		8.4499	22.995	1.192	1.2633	0.65342	26.866	4.5793	4.0986		0.64535	1.0618	1.3098	1.3936	1.4061	2.8879	1.5014	13.903		2019.3	197.6	182.11	282.76	467.64	764.98	382	56.233		4.7159	54.941	2.7171	9.5903
199.904	6.5035	0.12218	7.9371	3.0836	4.0599	1.5511	7.3174	20.355		3.3261	20.156	3.4388	4.0462	2.1026	1.51	2.9951	4.0188		8.8022	21.726	1.1596	1.1928	0.65638	25.396	4.495	3.7146		0.63651	1.0504	1.286	1.4076	1.4357	2.8889	1.5063	13.907		1993.5	183.88	175.93	277.61	439.83	767.22	375.26	69.969		4.8564	54.692	2.7987	9.482
200.423	6.5442	0.12256	7.928	2.8442	3.9516	1.5485	7.491	21.19		3.2169	18.904	3.7099	3.9909	2.2483	1.4964	2.7455	3.9385		9.1675	20.396	1.1281	1.137	0.67898	24.034	4.423	3.3988		0.62994	1.0361	1.2593	1.4215	1.4717	2.8765	1.5164	13.914		1960	170.67	172.42	271.55	411.77	767.44	367.04	85.264		4.9817	54.405	2.883	9.3558
200.942	6.5733	0.12301	7.9496	2.6395	3.8212	1.547	7.6525	21.942		3.107	17.71	4.0003	3.9249	2.3951	1.4857	2.5217	3.8664		9.5366	19.027	1.0986	1.0961	0.72214	22.805	4.3641	3.1531		0.62567	1.0189	1.2301	1.4353	1.5139	2.851	1.531	13.925		1919.2	158.13	171.46	264.64	383.86	765.64	357.37	101.95		5.0884	54.088	2.9712	9.2095
201.462	6.5909	0.12353	8.0014	2.4711	3.6725	1.5466	7.7996	22.595		2.9987	16.586	4.3057	3.8484	2.5409	1.4772	2.3251	3.8028		9.9001	17.64	1.072	1.0703	0.78664	21.731	4.3191	2.9785		0.62373	0.99857	1.199	1.4493	1.5617	2.8131	1.5496	13.939		1871.6	146.35	172.91	256.96	356.5	761.81	346.34	119.88		5.1734	53.747	3.0646	9.0418
201.981	6.5977	0.12412	8.0822	2.3399	3.5101	1.5473	7.93	23.133		2.8944	15.542	4.6213	3.7621	2.6838	1.4699	2.1565	3.7475		10.248	16.255	1.0493	1.0595	0.87303	20.831	4.2888	2.8751		0.62408	0.97513	1.1668	1.4633	1.6144	2.7635	1.5714	13.953		1817.9	135.42	176.54	248.59	330.08	755.97	334.07	138.89		5.2341	53.387	3.1647	8.8522
202.5	6.5943	0.1248	8.1897	2.2461	3.3385	1.5493	8.0413	23.545		2.796	14.591	4.9422	3.6669	2.8221	1.4631	2.0165	3.7003		10.572	14.891	1.0313	1.0633	0.98167	20.119	4.2739	2.8418		0.62668	0.94859	1.134	1.4776	1.6711	2.7032	1.5954	13.967		1758.8	125.41	182.11	239.62	304.99	748.13	320.72	158.83		5.2686	53.013	3.2727	8.6408
203.019	6.582	0.12556	8.3212	2.1893	3.1628	1.5524	8.1312	23.823		2.7054	13.743	5.2634	3.5637	2.9541	1.4561	1.9056	3.6611		10.864	13.564	1.0189	1.0811	1.1126	19.601	4.2752	2.8766		0.63145	0.91905	1.1014	1.4919	1.7308	2.6333	1.6209	13.98		1695	116.34	189.36	230.15	281.59	738.36	306.49	179.54		5.2755	52.626	3.39	8.4089
203.538	6.562	0.12643	8.4731	2.1683	2.9877	1.5567	8.1976	23.958		2.624	13.011	5.5796	3.4539	3.0784	1.4481	1.8237	3.6296		11.115	12.29	1.013	1.1123	1.2658	19.281	4.2932	2.9766		0.63828	0.88669	1.0694	1.5063	1.7923	2.5552	1.6467	13.989		1627.5	108.22	197.99	220.25	260.23	726.69	291.62	200.88		5.254	52.227	3.5177	8.1581
204.058	6.5358	0.1274	8.6415	2.1816	2.818	1.562	8.2382	23.947		2.5531	12.407	5.8856	3.3388	3.1937	1.4388	1.7707	3.6054		11.32	11.081	1.014	1.1559	1.4405	19.157	4.3285	3.1381		0.64704	0.85173	1.0386	1.5206	1.8542	2.4702	1.6718	13.995		1557	101.05	207.68	210.02	241.22	713.18	276.36	222.69		5.2042	51.815	3.6572	7.891
204.577	6.505	0.12848	8.8219	2.2269	2.6581	1.5683	8.2513	23.79		2.4935	11.944	6.1767	3.22	3.299	1.4275	1.7463	3.5883		11.474	9.9492	1.0225	1.2109	1.6361	19.22	4.3813	3.3569		0.65756	0.81449	1.0097	1.5345	1.9152	2.3798	1.6953	13.996		1484.4	94.793	218.1	199.55	224.81	697.92	260.97	244.84		5.1266	51.384	3.8096	7.6104
205.096	6.4715	0.12966	9.0096	2.3016	2.5123	1.5754	8.2354	23.49		2.4458	11.636	6.4481	3.0992	3.3934	1.4142	1.75	3.5781		11.572	8.902	1.039	1.276	1.8513	19.457	4.4517	3.6279		0.66968	0.77533	0.98315	1.5479	1.9738	2.2854	1.7162	13.993		1410.5	89.391	228.94	188.92	211.24	680.96	245.74	267.17		5.0225	50.928	3.976	7.3198
205.615	6.4369	0.13095	9.2	2.4027	2.384	1.5831	8.1892	23.051		2.4104	11.5	6.696	2.9781	3.4761	1.3984	1.7812	3.5745		11.613	7.9456	1.0635	1.35	2.0845	19.85	4.5393	3.9458		0.6832	0.73467	0.95932	1.5604	2.0286	2.1886	1.7336	13.985		1336.3	84.783	239.86	178.22	200.67	662.41	230.95	289.53		4.8938	50.439	4.1575	7.0227
206.135	6.4029	0.13234	9.3883	2.5268	2.2765	1.5914	8.1122	22.482		2.3873	11.552	6.9167	2.8585	3.5466	1.3803	1.8391	3.5773		11.596	7.0841	1.0962	1.4313	2.3339	20.379	4.6437	4.3045		0.69789	0.69301	0.93862	1.5718	2.0782	2.0909	1.7467	13.974		1262.3	80.892	250.55	167.52	193.24	642.36	216.85	311.79		4.7428	49.905	4.3551	6.7229
206.654	6.3713	0.13383	9.5702	2.6703	2.1922	1.6001	8.004	21.795		2.3762	11.812	7.1075	2.7423	3.6046	1.3599	1.9231	3.5863		11.52	6.3191	1.1368	1.5186	2.597	21.017	4.7639	4.6981		0.71354	0.65084	0.92137	1.5815	2.1213	1.9936	1.755	13.962		1189.5	77.634	260.7	156.91	189	620.92	203.71	333.79		4.5727	49.314	4.5696	6.4243
207.173	6.3436	0.13541	9.7419	2.8296	2.1329	1.6088	7.8652	21.001		2.3767	12.299	7.2665	2.6312	3.6497	1.3373	2.0322	3.6015		11.389	5.6505	1.185	1.6101	2.8712	21.736	4.8986	5.1202		0.72991	0.60873	0.90778	1.5893	2.1567	1.8982	1.7579	13.948		1118.3	74.92	270.05	146.45	187.98	598.22	191.75	355.39		4.3869	48.652	4.8018	6.1304
207.692	6.3212	0.13708	9.9	3.0009	2.0998	1.6176	7.6965	20.115		2.3883	13.034	7.3924	2.527	3.6817	1.313	2.1656	3.6228		11.205	5.0764	1.2402	1.7043	3.1535	22.507	5.0461	5.5644		0.74674	0.56724	0.89802	1.5947	2.1834	1.8057	1.7551	13.936		1049.4	72.663	278.34	136.21	190.12	574.41	181.16	376.43		4.1892	47.907	5.0522	5.8447
208.212	6.3053	0.1388	10.042	3.1806	2.0934	1.6262	7.4995	19.153		2.4099	14.038	7.4851	2.4312	3.7005	1.2873	2.3224	3.6502		10.972	4.5933	1.3017	1.7997	3.4406	23.3	5.2046	6.0247		0.7638	0.52697	0.89216	1.5975	2.2005	1.7172	1.7465	13.926		983.24	70.775	285.35	126.25	195.35	549.63	172.1	396.76		3.9839	47.064	5.3214	5.5702
208.731	6.2969	0.14058	10.166	3.365	2.1137	1.6344	7.276	18.131		2.4408	15.332	7.5449	2.3455	3.7061	1.2606	2.5016	3.6836		10.694	4.1963	1.3686	1.8946	3.7289	24.082	5.3718	6.4948		0.78084	0.48851	0.89018	1.5971	2.2076	1.6337	1.7321	13.919		920.27	69.177	290.88	116.63	203.5	524.06	164.71	416.23		3.7752	46.112	5.6097	5.3096
209.25	6.297	0.14239	10.272	3.5508	2.1599	1.6422	7.0287	17.066		2.4798	16.936	7.5732	2.2712	3.6985	1.2336	2.7023	3.7231		10.378	3.8793	1.4397	1.9874	4.0147	24.826	5.5451	6.9689		0.79762	0.45242	0.89201	1.5933	2.2044	1.5558	1.712	13.918		860.82	67.795	294.81	107.39	214.4	497.89	159.05	434.69		3.5679	45.041	5.9173	5.0648
209.769	6.3063	0.1442	10.36	3.7349	2.2305	1.6493	6.7605	15.973		2.5256	18.87	7.572	2.2094	3.6779	1.2068	2.9232	3.7686		10.028	3.6355	1.5139	2.0768	4.2941	25.502	5.7218	7.4418		0.81391	0.41928	0.89749	1.5859	2.1908	1.4842	1.6868	13.921		805.11	66.57	297.01	98.578	227.81	471.33	155.18	451.97		3.3663	43.842	6.2443	4.8375
210.288	6.3252	0.146	10.431	3.9144	2.3239	1.6556	6.4745	14.869		2.5771	21.148	7.544	2.1611	3.6443	1.1807	3.1633	3.8201		9.6509	3.4573	1.5899	2.1613	4.5632	26.085	5.899	7.9082		0.82949	0.38962	0.90641	1.5747	2.1671	1.4191	1.6569	13.93		753.33	65.45	297.42	90.228	243.45	444.6	153.09	467.91		3.1751	42.511	6.5909	4.6286
210.808	6.3541	0.14777	10.488	4.087	2.4376	1.6611	6.1746	13.767		2.6328	23.786	7.4923	2.1269	3.5981	1.1561	3.4212	3.8777		9.2523	3.3365	1.6663	2.2397	4.8181	26.553	6.0739	8.3636		0.84416	0.3639	0.9185	1.5596	2.1338	1.3607	1.6228	13.943		705.56	64.4	296.03	82.367	261.04	417.92	152.73	482.37		2.9987	41.047	6.9571	4.4387
211.327	6.3932	0.14947	10.534	4.2506	2.569	1.6656	5.8646	12.682		2.6915	26.791	7.4207	2.1073	3.5396	1.1335	3.6957	3.9414		8.8385	3.2651	1.7417	2.3109	5.0551	26.889	6.2435	8.8041		0.85774	0.34258	0.93347	1.5406	2.0915	1.3092	1.5855	13.959		661.83	63.396	292.86	75.013	280.23	391.54	154.03	495.19		2.8413	39.452	7.3431	4.2676
211.846	6.4423	0.15108	10.573	4.4033	2.7151	1.6692	5.5485	11.625		2.7518	30.168	7.3328	2.1022	3.4692	1.1135	3.9853	4.0112		8.4151	3.2346	1.8148	2.3741	5.2705	27.078	6.405	9.226		0.87007	0.32601	0.95097	1.5179	2.0414	1.2644	1.5457	13.976		622.12	62.43	287.97	68.18	300.68	365.69	156.87	506.23		2.7067	37.735	7.7491	4.1147
212.365	6.5012	0.15257	10.608	4.544	2.8728	1.6719	5.2307	10.607		2.8122	33.917	7.2328	2.1116	3.3873	1.0967	4.2881	4.0872		7.9876	3.2372	1.8841	2.4285	5.461	27.111	6.5558	9.6264		0.88105	0.31449	0.97067	1.4916	1.9843	1.226	1.5043	13.992		586.34	61.504	281.47	61.871	322.04	340.6	161.11	515.36		2.5985	35.905	8.1756	3.9791
212.885	6.5694	0.15392	10.646	4.6715	3.0387	1.6735	4.9153	9.6385		2.8715	38.029	7.1246	2.135	3.2947	1.0835	4.6025	4.1695		7.5611	3.2653	1.9483	2.4737	5.6237	26.986	6.6933	10.003		0.89058	0.30824	0.99222	1.4621	1.9216	1.1938	1.4622	14.005		554.37	60.633	273.48	56.082	343.92	316.53	166.57	522.47		2.52	33.978	8.6232	3.8595
213.404	6.6461	0.15511	10.69	4.7853	3.2096	1.6742	4.6065	8.727		2.9283	42.492	7.0121	2.1714	3.1921	1.0743	4.9264	4.2581		7.1403	3.3119	2.0064	2.5092	5.7559	26.702	6.8155	10.353		0.89862	0.30738	1.0153	1.43	1.8546	1.1672	1.4204	14.01		526.05	59.843	264.19	50.804	365.96	293.68	173.07	527.45		2.4737	31.974	9.0928	3.7544
213.923	6.7302	0.15611	10.746	4.8848	3.3823	1.6741	4.3084	7.8797		2.9814	47.283	6.8991	2.2199	3.0802	1.0695	5.2575	4.3532		6.7294	3.3709	2.0573	2.5349	5.8555	26.266	6.9204	10.676		0.90518	0.31195	1.0394	1.3958	1.7845	1.1458	1.3797	14.005		501.18	59.168	253.77	46.019	387.79	272.26	180.41	530.25		2.4621	29.916	9.5858	3.6619
214.442	6.8206	0.15691	10.819	4.97	3.5537	1.6731	4.0251	7.1025		3.0295	52.376	6.7889	2.279	2.9601	1.0693	5.5935	4.4549		6.332	3.4372	2.1	2.551	5.9209	25.687	7.0066	10.97		0.91029	0.3219	1.0645	1.3602	1.7126	1.1291	1.3411	13.987		479.55	58.645	242.43	41.704	409.04	252.47	188.38	530.82		2.4868	27.832	10.104	3.5804
214.962	6.9156	0.1575	10.912	5.0407	3.7213	1.6715	3.7603	6.4003		3.0715	57.733	6.6844	2.3473	2.8327	1.0739	5.932	4.5632		5.9513	3.5067	2.1338	2.5576	5.9513	24.979	7.0731	11.235		0.91404	0.33707	1.09	1.3241	1.6401	1.1164	1.3053	13.953		460.96	58.319	230.37	37.831	429.37	234.45	196.77	529.17		2.549	25.752	10.648	3.5081
215.481	7.0134	0.15784	11.032	5.097	3.8825	1.6692	3.5174	5.7772		3.1064	63.312	6.5879	2.4229	2.6993	1.0833	6.2704	4.6782		5.5901	3.5763	2.1582	2.5552	5.9461	24.157	7.1192	11.47		0.91656	0.35721	1.1157	1.2885	1.5682	1.1071	1.2731	13.9		445.17	58.232	217.82	34.369	448.45	218.34	205.36	525.31		2.6494	23.708	11.221	3.4434
216	7.1121	0.15795	11.179	5.1393	4.0354	1.6664	3.2994	5.2365		3.1331	69.063	6.5015	2.5041	2.5611	1.0973	6.6059	4.7999		5.2504	3.6444	2.1727	2.5443	5.9055	23.241	7.1446	11.676		0.91801	0.38198	1.1414	1.2543	1.4979	1.1007	1.245	13.828		431.96	58.428	204.97	31.282	465.97	204.23	213.97	519.33		2.788	21.737	11.825	3.3847
216.519	7.2096	0.15781	11.358	5.1677	4.1784	1.6632	3.1091	4.7808		3.151	74.929	6.4263	2.5889	2.4196	1.1159	6.936	4.9282		4.9339	3.7104	2.1771	2.5255	5.8304	22.251	7.1494	11.851		0.91859	0.41094	1.1667	1.2227	1.43	1.0966	1.2215	13.733		421.1	58.945	192.04	28.535	481.63	192.2	222.4	511.31		2.9642	19.876	12.462	3.3309
217.038	7.3034	0.15741	11.571	5.1825	4.3105	1.6597	2.9487	4.4119		3.1593	80.847	6.3632	2.6754	2.2761	1.1386	7.2579	5.0628		4.6418	3.7749	2.1713	2.4997	5.7222	21.209	7.1343	11.997		0.91851	0.44358	1.1913	1.1947	1.3653	1.0944	1.2032	13.617		412.39	59.816	179.19	26.091	495.2	182.25	230.49	501.41		3.1768	18.161	13.134	3.2808
217.558	7.3913	0.15675	11.817	5.1841	4.431	1.656	2.8198	4.1311		3.1575	86.748	6.3121	2.7617	2.1321	1.1651	7.5691	5.2036		4.375	3.8398	2.1555	2.4677	5.5828	20.135	7.1002	12.115		0.918	0.47931	1.2151	1.1714	1.3045	1.0936	1.1901	13.481		405.63	61.065	166.6	23.915	506.46	174.39	238.09	489.77		3.4239	16.629	13.844	3.2337
218.077	7.4706	0.15585	12.099	5.1726	4.5397	1.6522	2.7236	3.9391		3.1453	92.561	6.2728	2.846	1.9893	1.1949	7.867	5.3499		4.1338	3.9079	2.1298	2.4303	5.4146	19.051	7.0481	12.203		0.91732	0.51749	1.2378	1.1538	1.2478	1.0938	1.1824	13.325		400.64	62.709	154.41	21.975	515.2	168.57	245.05	476.6		3.7032	15.318	14.593	3.189
218.596	7.5391	0.1547	12.414	5.1485	4.637	1.6483	2.6605	3.8359		3.1226	98.209	6.2442	2.9268	1.8493	1.2273	8.1495	5.501		3.9181	3.983	2.0946	2.3887	5.2206	17.976	6.9797	12.264		0.91669	0.55741	1.259	1.1431	1.1957	1.0948	1.1803	13.153		397.27	64.753	142.74	20.24	521.31	164.71	251.29	462.12		4.0115	14.262	15.382	3.1465
219.115	7.5941	0.1533	12.76	5.1121	4.7236	1.6444	2.6306	3.8208		3.0894	103.61	6.2249	3.0027	1.7137	1.2618	8.4141	5.6561		3.7278	4.0699	2.0506	2.3436	5.004	16.93	6.8967	12.297		0.91637	0.59836	1.2786	1.1399	1.1483	1.0964	1.1835	12.967		395.38	67.19	131.68	18.687	524.66	162.7	256.71	446.54		4.3453	13.493	16.211	3.1061
219.635	7.6333	0.15169	13.136	5.0637	4.8004	1.6405	2.633	3.8922		3.046	108.7	6.2131	3.0724	1.5842	1.2976	8.659	5.8142		3.5621	4.1737	1.9984	2.2961	4.7681	15.927	6.8008	12.304		0.91656	0.63957	1.2961	1.1452	1.1056	1.0985	1.192	12.774		394.87	70.004	121.3	17.296	525.2	162.41	261.26	430.09		4.7003	13.04	17.079	3.0677
220.154	7.6544	0.14986	13.536	5.0039	4.8686	1.6367	2.6666	4.0479		2.9929	113.38	6.2066	3.1351	1.4623	1.334	8.8822	5.9737		3.4202	4.3002	1.9388	2.2469	4.5168	14.983	6.6943	12.285		0.91747	0.68031	1.3114	1.1595	1.0678	1.1011	1.2053	12.577		395.66	73.167	111.65	16.052	522.9	163.68	264.89	413.01		5.0721	12.928	17.986	3.0318
220.673	7.6552	0.14784	13.957	4.9331	4.9297	1.633	2.7295	4.2847		2.9307	117.58	6.203	3.19	1.3496	1.3702	9.0822	6.1333		3.3008	4.4554	1.8726	2.197	4.2539	14.109	6.5792	12.241		0.91928	0.71985	1.3241	1.1833	1.0346	1.1043	1.2232	12.382		397.7	76.64	102.76	14.947	517.79	166.35	267.6	395.53		5.4555	13.178	18.928	2.9985
221.192	7.6337	0.14566	14.394	4.8521	4.9851	1.6293	2.8196	4.5983		2.8603	121.24	6.1997	3.2368	1.2477	1.4056	9.2574	6.2912		3.2027	4.6453	1.8008	2.1469	3.983	13.313	6.4577	12.173		0.9221	0.75752	1.334	1.2168	1.0059	1.1082	1.2453	12.195		400.97	80.374	94.635	13.98	509.94	170.22	269.38	377.84		5.8453	13.805	19.901	2.9683
221.712	7.5881	0.14333	14.839	4.7617	5.0364	1.6257	2.9342	4.9836		2.7827	124.27	6.1942	3.2753	1.1578	1.4395	9.4066	6.4454		3.1243	4.8759	1.7244	2.0974	3.7079	12.601	6.3319	12.081		0.92605	0.79267	1.3407	1.2601	0.98158	1.1132	1.2709	12.021		405.48	84.314	87.264	13.154	499.44	175.11	270.27	360.16		6.236	14.821	20.9	2.9416
222.231	7.5169	0.14088	15.287	4.663	5.085	1.6222	3.0702	5.4345		2.6991	126.63	6.1839	3.3054	1.0813	1.4712	9.5288	6.5937		3.0641	5.1525	1.6445	2.0488	3.4322	11.977	6.2037	11.965		0.93116	0.82475	1.3439	1.313	0.96143	1.1194	1.2996	11.865		411.27	88.398	80.626	12.478	486.44	180.85	270.29	342.64		6.6218	16.228	21.917	2.9187
222.75	7.4191	0.13834	15.73	4.5573	5.1322	1.6187	3.2245	5.9438		2.6109	128.26	6.1664	3.3275	1.0192	1.5003	9.6229	6.7339		3.0202	5.4803	1.5622	2.0015	3.1593	11.439	6.0753	11.827		0.93745	0.85329	1.3433	1.3752	0.94524	1.1274	1.3307	11.731		418.41	92.557	74.69	11.965	471.13	187.24	269.5	325.45		6.9969	18.025	22.945	2.9001
223.269	7.2939	0.13575	16.163	4.4462	5.179	1.6151	3.3938	6.5032		2.5195	129.13	6.1398	3.3419	0.97251	1.5263	9.6883	6.8636		2.9909	5.8635	1.4785	1.9557	2.8923	10.988	5.9484	11.666		0.94486	0.87792	1.3387	1.4462	0.93278	1.1375	1.3637	11.624		426.98	96.724	69.42	11.635	453.71	194.12	267.96	308.71		7.3556	20.205	23.974	2.886
223.788	7.1412	0.13313	16.578	4.3314	5.2265	1.6116	3.5745	7.1037		2.4264	129.19	6.1024	3.3491	0.94192	1.5489	9.7245	6.9804		2.9745	6.3052	1.3944	1.9114	2.634	10.617	5.8246	11.484		0.95333	0.89835	1.3298	1.5251	0.92385	1.1502	1.3979	11.546		437.12	100.83	64.774	11.508	434.42	201.35	265.74	292.52		7.6923	22.752	24.995	2.8768
224.308	6.9613	0.13051	16.969	4.215	5.2753	1.6081	3.7635	7.7353		2.3332	128.46	6.053	3.35	0.92795	1.568	9.731	7.0821		2.969	6.8076	1.311	1.8686	2.387	10.321	5.7055	11.28		0.96273	0.91443	1.3165	1.611	0.91822	1.1662	1.4328	11.498		448.97	104.8	60.713	11.607	413.53	208.77	262.92	276.97		8.0015	25.646	25.995	2.8725
224.827	6.7553	0.12792	17.331	4.0997	5.3258	1.6045	3.9575	8.3871		2.2416	126.91	5.9911	3.3453	0.93084	1.5835	9.7078	7.1664		2.9727	7.3717	1.229	1.8272	2.1534	10.093	5.5924	11.056		0.97292	0.92611	1.2987	1.7028	0.91566	1.1858	1.4677	11.481		462.69	108.57	57.197	11.957	391.32	216.28	259.57	262.13		8.278	28.859	26.965	2.8734
225.346	6.5249	0.1254	17.657	3.988	5.3783	1.6009	4.1536	9.048		2.1531	124.58	5.9165	3.336	0.95062	1.5956	9.6547	7.2314		2.9839	7.9971	1.1494	1.7869	1.9349	9.9242	5.4863	10.812		0.98372	0.93344	1.2762	1.7993	0.91595	1.2099	1.5021	11.493		478.46	112.09	54.191	12.582	368.1	223.78	255.77	248.04		8.517	32.36	27.891	2.8795
225.865	6.2721	0.12296	17.944	3.8831	5.4328	1.5973	4.3489	9.706		2.0694	121.5	5.8299	3.323	0.98704	1.6047	9.5719	7.2751		3.0008	8.6818	1.0729	1.7474	1.7329	9.8052	5.3884	10.548		0.99494	0.93658	1.2492	1.899	0.91885	1.2388	1.5353	11.534		496.46	115.29	51.665	13.506	344.16	231.2	251.61	234.75		8.7142	36.108	28.761	2.8907
226.385	6	0.12064	18.189	3.7884	5.4892	1.5937	4.5412	10.349		1.992	117.71	5.7325	3.3075	1.0396	1.6112	9.4598	7.2963		3.022	9.4225	1	1.7084	1.5486	9.7274	5.2993	10.265		1.0064	0.9358	1.2177	2.0004	0.9241	1.2732	1.5669	11.599		516.89	118.14	49.595	14.751	319.84	238.49	247.15	222.29		8.8658	40.062	29.565	2.907
226.904	5.7119	0.11845	18.387	3.7075	5.5474	1.5902	4.7283	10.966		1.9222	113.28	5.626	3.2906	1.1074	1.6156	9.319	7.2937		3.0459	10.214	0.93142	1.6696	1.3825	9.6825	5.2198	9.9639		1.0178	0.93142	1.1819	2.1021	0.93143	1.3137	1.5964	11.685		539.9	120.6	47.965	16.336	295.42	245.61	242.48	210.68		8.9686	44.172	30.29	2.9281
227.423	5.4117	0.11642	18.538	3.6443	5.6071	1.5867	4.9085	11.543		1.8614	108.29	5.5126	3.2734	1.1896	1.6187	9.1504	7.2667		3.0713	11.051	0.86746	1.6306	1.235	9.6632	5.1504	9.6461		1.0291	0.92385	1.1421	2.2023	0.94057	1.3608	1.6232	11.787		565.66	122.63	46.765	18.277	271.24	252.55	237.65	199.93		9.0202	48.388	30.924	2.9539
227.942	5.1037	0.11456	18.641	3.6028	5.6681	1.5834	5.0803	12.071		1.8108	102.82	5.395	3.2573	1.2847	1.6213	8.9548	7.2149		3.0968	11.925	0.80847	1.5913	1.1063	9.6636	5.0915	9.3125		1.0399	0.91353	1.0987	2.2995	0.9512	1.4148	1.647	11.899		594.28	124.23	45.991	20.583	247.56	259.32	232.73	190.07		9.0187	52.654	31.457	2.9838
228.462	4.7924	0.11289	18.695	3.5872	5.7302	1.5802	5.2425	12.538		1.7713	96.96	5.2762	3.2432	1.3912	1.6242	8.7337	7.1384		3.1216	12.828	0.75471	1.5513	0.99596	9.6796	5.0433	8.9648		1.0501	0.90097	1.0521	2.3921	0.963	1.476	1.6674	12.016		625.84	125.39	45.646	23.263	224.69	265.92	227.77	181.11		8.9634	56.915	31.88	3.0176
228.981	4.4826	0.11141	18.701	3.6017	5.7931	1.5774	5.3941	12.935		1.7436	90.817	5.1593	3.2324	1.5072	1.6282	8.4884	7.0378		3.1447	13.749	0.70631	1.5108	0.90366	9.709	5.0058	8.6047		1.0595	0.88667	1.003	2.4786	0.97561	1.5448	1.6839	12.133		660.35	126.12	45.735	26.316	202.86	272.36	222.81	173.06		8.8543	61.113	32.181	3.0547
229.5	4.1788	0.11015	18.662	3.6507	5.8569	1.5748	5.5345	13.253		1.7284	84.492	5.0475	3.226	1.6308	1.6343	8.2209	6.914		3.1653	14.677	0.66338	1.4695	0.82867	9.7521	4.9789	8.2342		1.0679	0.87115	0.95185	2.5575	0.98868	1.6213	1.6963	12.244		697.77	126.42	46.27	29.737	182.31	278.67	217.9	165.94		8.6924	65.19	32.355	3.0944
230.019	3.8859	0.1091	18.578	3.7379	5.9217	1.5727	5.6629	13.486		1.726	78.088	4.9439	3.2246	1.7597	1.6433	7.9331	6.7683		3.1828	15.601	0.62593	1.4278	0.77016	9.8112	4.9623	7.8556		1.075	0.85491	0.89942	2.6277	1.0018	1.7053	1.7044	12.344		737.96	126.33	47.262	33.517	163.25	284.87	213.07	159.75		8.4795	69.089	32.393	3.1359
230.538	3.6083	0.10827	18.455	3.8674	5.9875	1.5709	5.7788	13.63		1.7365	71.707	4.8514	3.2293	1.8916	1.656	7.6273	6.6024		3.1967	16.509	0.59393	1.3857	0.72715	9.8911	4.9553	7.4714		1.0806	0.83844	0.84641	2.688	1.0147	1.7967	1.7078	12.43		780.71	125.87	48.721	37.639	145.85	290.96	208.34	154.5		8.2185	72.755	32.29	3.1784
231.058	3.3502	0.10766	18.295	4.0422	6.0546	1.5697	5.8817	13.68		1.7597	65.448	4.7726	3.2405	2.0239	1.6732	7.3061	6.4182		3.2066	17.388	0.56731	1.3437	0.69856	9.9985	4.9573	7.0843		1.0845	0.82219	0.79359	2.7376	1.0268	1.8953	1.7066	12.497		825.73	125.1	50.657	42.081	130.24	296.94	203.73	150.18		7.9134	76.135	32.043	3.2208
231.577	3.1154	0.10727	18.103	4.2653	6.1234	1.5691	5.9711	13.636		1.7952	59.402	4.7097	3.2586	2.1541	1.6954	6.9721	6.2182		3.212	18.226	0.54597	1.3023	0.68325	10.142	4.9672	6.6973		1.0866	0.80657	0.74176	2.7757	1.0379	2.0004	1.7008	12.545		872.63	124.04	53.074	46.817	116.52	302.81	199.25	146.79		7.5686	79.18	31.651	3.2619
232.096	2.9073	0.1071	17.884	4.5385	6.194	1.569	6.0465	13.499		1.8425	53.652	4.6645	3.2839	2.2796	1.7231	6.6283	6.0049		3.2129	19.011	0.52979	1.2618	0.68007	10.332	4.9837	6.3134		1.0867	0.79196	0.69174	2.8021	1.0477	2.1116	1.6904	12.571		920.96	122.75	55.974	51.814	104.77	308.54	194.9	144.33		7.1897	81.843	31.114	3.3006
232.615	2.7287	0.10714	17.645	4.863	6.2667	1.5696	6.1077	13.273		1.9008	48.273	4.6379	3.3163	2.3979	1.7567	6.2777	5.7809		3.2089	19.733	0.51861	1.2231	0.68784	10.581	5.0055	5.9359		1.0847	0.77864	0.64434	2.8165	1.0557	2.2281	1.6756	12.576		970.17	121.29	59.349	57.035	94.991	314.08	190.69	142.76		6.7826	84.085	30.435	3.3356
233.135	2.582	0.10739	17.39	5.2388	6.3419	1.5708	6.1541	12.962		1.969	43.328	4.6306	3.3556	2.5064	1.7963	5.9236	5.5494		3.2	20.38	0.51226	1.1866	0.70543	10.899	5.031	5.5679		1.0805	0.76688	0.60038	2.819	1.0617	2.3489	1.6568	12.561		1019.7	119.7	63.184	62.442	87.192	319.38	186.61	142.06		6.3539	85.87	29.62	3.3654
233.654	2.4686	0.10784	17.127	5.6647	6.4195	1.5726	6.1856	12.575		2.0458	38.869	4.6424	3.4015	2.6031	1.8421	5.5691	5.3132		3.1861	20.943	0.51057	1.1532	0.73176	11.301	5.0585	5.2127		1.074	0.75687	0.56069	2.81	1.0656	2.4732	1.6345	12.528		1068.8	118.02	67.457	67.99	81.325	324.36	182.64	142.2		5.9103	87.171	28.676	3.3888
234.173	2.3896	0.10848	16.859	6.1384	6.4994	1.5751	6.202	12.119		2.1299	34.936	4.6726	3.4534	2.6856	1.8937	5.2173	5.0757		3.1673	21.414	0.51333	1.1235	0.76579	11.797	5.0863	4.8733		1.0652	0.74874	0.52604	2.7901	1.067	2.5997	1.6091	12.479		1116.8	116.31	72.135	73.633	77.312	328.95	178.78	143.14		5.4588	87.966	27.613	3.4043
234.692	2.3453	0.10931	16.594	6.656	6.5813	1.5782	6.2034	11.607		2.2198	31.557	4.7198	3.5106	2.7524	1.9509	4.8716	4.84		3.1437	21.786	0.52033	1.0982	0.80657	12.4	5.1125	4.5527		1.0543	0.74258	0.49721	2.7602	1.0661	2.7275	1.5815	12.419		1163.1	114.6	77.178	79.325	75.048	333.05	175.01	144.83		5.0063	88.241	26.444	3.4107
235.212	2.3353	0.11031	16.335	7.2124	6.6647	1.5819	6.19	11.049		2.3137	28.748	4.7822	3.5721	2.8019	2.013	4.535	4.6095		3.1156	22.055	0.53136	1.078	0.85325	13.119	5.1354	4.2536		1.0414	0.73842	0.47492	2.7211	1.0627	2.8553	1.5524	12.351		1206.9	112.92	82.537	85.016	74.398	336.54	171.31	147.23		4.5594	87.993	25.183	3.4068
235.731	2.3585	0.11147	16.088	7.8011	6.7487	1.5862	6.1625	10.459		2.4099	26.513	4.8574	3.637	2.833	2.0795	4.2103	4.3872		3.0834	22.217	0.54618	1.0636	0.90505	13.962	5.1532	3.9784		1.0265	0.73624	0.45988	2.6741	1.0569	2.9821	1.5227	12.28		1247.6	111.29	88.156	90.658	75.208	339.33	167.65	150.28		4.1244	87.227	23.847	3.3914
236.25	2.4133	0.11279	15.854	8.4142	6.8324	1.5909	6.1216	9.8511		2.5067	24.845	4.9425	3.7041	2.8451	2.1495	3.9002	4.1764		3.0477	22.27	0.56453	1.0555	0.96126	14.936	5.1643	3.7291		1.01	0.736	0.45274	2.6205	1.0489	3.1067	1.4935	12.209		1284.4	109.73	93.973	96.202	77.304	341.3	164.03	153.92		3.707	85.956	22.452	3.3638
236.769	2.4975	0.11424	15.636	9.0427	6.9143	1.596	6.0684	9.2381		2.6022	23.726	5.0346	3.7724	2.8378	2.2218	3.6074	3.9802		3.009	22.215	0.58618	1.0542	1.0213	16.043	5.1671	3.5073		0.99204	0.73762	0.45409	2.5616	1.0388	3.2282	1.4656	12.142		1316.9	108.24	99.92	101.6	80.497	342.33	160.42	158.1		3.3124	84.204	21.019	3.3231
237.288	2.6081	0.11582	15.435	9.6766	6.9931	1.6015	6.0045	8.6344		2.6946	23.129	5.1304	3.8406	2.8114	2.2956	3.3341	3.8014		2.9684	22.054	0.61085	1.0601	1.0846	17.283	5.1603	3.3144		0.97303	0.74097	0.46446	2.4989	1.027	3.3457	1.4402	12.082		1344.5	106.82	105.93	106.81	84.591	342.33	156.81	162.77		2.945	82.005	19.566	3.2688
237.808	2.742	0.1175	15.252	10.305	7.067	1.6073	5.9313	8.0535		2.7823	23.019	5.2263	3.9076	2.7663	2.3694	3.0824	3.6429		2.9269	21.79	0.63827	1.0734	1.1507	18.654	5.143	3.151		0.95327	0.74594	0.48434	2.4338	1.014	3.4584	1.4183	12.033		1366.8	105.46	111.93	111.77	89.384	341.2	153.17	167.86		2.6084	79.4	18.114	3.2007
238.327	2.8954	0.11928	15.085	10.916	7.1345	1.6132	5.8507	7.5081		2.8637	23.353	5.3191	3.9722	2.7037	2.4422	2.854	3.5073		2.8858	21.427	0.66818	1.0942	1.2193	20.148	5.1141	3.0174		0.93317	0.75237	0.5141	2.3679	1	3.5658	1.4008	11.996		1383.3	104.14	117.85	116.46	94.673	338.86	149.51	173.35		2.3054	76.44	16.681	3.1187
238.846	3.0644	0.12113	14.932	11.499	7.1936	1.6192	5.7648	7.01		2.9373	24.083	5.4055	4.0335	2.6249	2.5125	2.6505	3.3966		2.8467	20.974	0.70031	1.1224	1.2898	21.757	5.0733	2.9135		0.91311	0.76009	0.55406	2.3025	0.98576	3.6673	1.3885	11.971		1394	102.82	123.63	120.83	100.26	335.23	145.81	179.17		2.038	73.18	15.288	3.0229
239.365	3.2447	0.12304	14.79	12.042	7.2428	1.6253	5.6755	6.5698		3.0022	25.157	5.4823	4.0905	2.5315	2.579	2.4732	3.313		2.8114	20.437	0.7344	1.158	1.3622	23.467	5.0203	2.8384		0.89352	0.76894	0.60443	2.239	0.97182	3.7627	1.3823	11.959		1398.6	101.49	129.22	124.84	105.96	330.28	142.08	185.29		1.8072	69.684	13.952	2.9139
239.885	3.432	0.12498	14.658	12.532	7.2805	1.6311	5.585	6.1963		3.0572	26.517	5.5466	4.1425	2.4255	2.6405	2.3232	3.258		2.782	19.826	0.77017	1.2004	1.436	25.261	4.9552	2.7912		0.87481	0.77875	0.66532	2.1788	0.95887	3.8518	1.3826	11.959		1397.1	100.11	134.54	128.45	111.58	323.97	138.32	191.67		1.6136	66.018	12.69	2.7923
240.404	3.6218	0.12694	14.53	12.96	7.3051	1.6368	5.4953	5.8967		3.1017	28.107	5.5959	4.1888	2.309	2.6956	2.2012	3.2329		2.7608	19.152	0.80739	1.2492	1.511	27.122	4.8784	2.7702		0.85742	0.78936	0.73672	2.123	0.94766	3.9346	1.3898	11.968		1389.6	98.664	139.58	131.64	116.97	316.29	134.55	198.29		1.4567	62.25	11.515	2.6589
240.923	3.8097	0.12888	14.404	13.317	7.3156	1.6422	5.4082	5.6765		3.1354	29.867	5.6281	4.2292	2.1844	2.7432	2.1078	3.2385		2.7504	18.426	0.8458	1.3036	1.5871	29.028	4.7908	2.7735		0.84176	0.80059	0.81851	2.0727	0.93897	4.0111	1.4041	11.984		1376.2	97.113	144.28	134.38	121.98	307.27	130.77	205.1		1.3353	58.451	10.44	2.5151
241.442	3.9915	0.1308	14.275	13.592	7.3109	1.6472	5.3255	5.5391		3.1581	31.739	5.6413	4.2632	2.0541	2.7822	2.0432	3.2754		2.7535	17.662	0.88518	1.3629	1.664	30.956	4.6935	2.7988		0.82821	0.8123	0.91042	2.0287	0.93361	4.0815	1.4254	12.004		1357.3	95.441	148.62	136.64	126.47	296.95	127.02	212.09		1.2479	54.688	9.4749	2.3622
241.962	4.1632	0.13265	14.14	13.78	7.2905	1.6517	5.2486	5.4859		3.17	33.665	5.6342	4.2909	1.9206	2.8115	2.0072	3.3436		2.773	16.872	0.92527	1.426	1.7416	32.881	4.588	2.8436		0.81714	0.82434	1.012	1.9917	0.93243	4.146	1.4534	12.024		1333.2	93.633	152.6	138.41	130.35	285.39	123.31	219.23		1.1923	51.028	8.6257	2.202
242.481	4.321	0.13441	13.996	13.876	7.2538	1.6556	5.1787	5.5165		3.1717	35.591	5.6058	4.3124	1.7864	2.8303	1.9995	3.4426		2.8121	16.071	0.96587	1.4917	1.8198	34.777	4.4758	2.9051		0.80887	0.83658	1.1228	1.9622	0.93626	4.2046	1.4876	12.042		1304.3	91.683	156.22	139.65	133.53	272.69	119.68	226.47		1.1657	47.534	7.8972	2.0363
243	4.4616	0.13606	13.84	13.875	7.201	1.6589	5.1168	5.6285		3.1637	37.466	5.5558	4.3279	1.6538	2.8378	2.0193	3.5717		2.8738	15.272	1.0067	1.559	1.8985	36.619	4.359	2.9804		0.80366	0.8489	1.242	1.9406	0.94592	4.2575	1.5273	12.053		1271	89.594	159.47	140.38	135.94	258.96	116.15	233.8		1.1653	44.265	7.2908	1.8673
243.519	4.5822	0.13758	13.669	13.777	7.1322	1.6614	5.0635	5.8177		3.1472	39.243	5.4841	4.3378	1.5251	2.8334	2.0655	3.7296		2.9611	14.491	1.0476	1.6264	1.9775	38.381	4.2398	3.0666		0.80174	0.86119	1.3687	1.9269	0.96219	4.3049	1.5716	12.055		1234	87.378	162.38	140.56	137.55	244.34	112.75	241.15		1.1879	41.271	6.8054	1.6974
244.038	4.6804	0.13892	13.484	13.582	7.0478	1.6632	5.0192	6.0784		3.1231	40.88	5.391	4.3425	1.4026	2.8167	2.1364	3.9147		3.0769	13.741	1.0884	1.6926	2.0569	40.038	4.1204	3.1605		0.80324	0.87335	1.502	1.921	0.98581	4.3467	1.6194	12.046		1193.7	85.059	164.98	140.21	138.34	228.97	109.52	248.5		1.23	38.6	6.4375	1.5294
244.558	4.7544	0.14007	13.281	13.293	6.9486	1.6641	4.984	6.4035		3.0928	42.341	5.2774	4.3429	1.2883	2.7875	2.2301	4.1249		3.2238	13.035	1.1286	1.7564	2.1366	41.566	4.0031	3.2593		0.80824	0.8853	1.6406	1.9226	1.0174	4.3831	1.6697	12.023		1150.8	82.67	167.3	139.32	138.31	213.01	106.46	255.77		1.2882	36.289	6.1813	1.3659
245.077	4.803	0.14102	13.062	12.916	6.8354	1.6642	4.9578	6.7847		3.0578	43.595	5.1444	4.3395	1.1838	2.7458	2.3442	4.3581		3.4042	12.387	1.1682	1.8163	2.2164	42.944	3.8903	3.3599		0.81674	0.89697	1.7833	1.9311	1.0576	4.4139	1.7213	11.987		1105.9	80.252	169.37	137.91	137.49	196.65	103.6	262.9		1.359	34.371	6.029	1.2099
245.596	4.8256	0.14173	12.827	12.456	6.7093	1.6633	4.9401	7.2126		3.0196	44.62	4.9935	4.3332	1.0908	2.6918	2.4761	4.6114		3.6199	11.808	1.2067	1.8713	2.2964	44.151	3.7845	3.4597		0.82865	0.9083	1.9286	1.9459	1.1067	4.4392	1.7729	11.938		1059.6	77.856	171.25	135.97	135.9	180.07	100.95	269.82		1.4392	32.87	5.9712	1.0647
246.115	4.8225	0.14219	12.576	11.922	6.5713	1.6616	4.9306	7.6772		2.9797	45.398	4.8262	4.3248	1.0107	2.626	2.6224	4.8821		3.8721	11.308	1.2439	1.9203	2.3763	45.169	3.6878	3.556		0.8438	0.91922	2.0749	1.966	1.1651	4.4589	1.8234	11.876		1012.3	75.538	172.97	133.54	133.62	163.45	98.519	276.43		1.5254	31.802	5.997	0.93346
246.635	4.7944	0.1424	12.312	11.324	6.4226	1.659	4.9286	8.1681		2.9399	45.919	4.6443	4.3152	0.94446	2.5491	2.7799	5.1668		4.1614	10.897	1.2795	1.9623	2.4561	45.983	3.6023	3.6464		0.86195	0.92968	2.2206	1.9906	1.2329	4.473	1.8717	11.805		964.74	73.361	174.57	130.63	130.7	146.98	96.304	282.65		1.6147	31.176	6.0947	0.81939
247.154	4.7428	0.14234	12.037	10.671	6.2643	1.6556	4.9333	8.6747		2.9016	46.178	4.45	4.3054	0.89302	2.4621	2.9449	5.4624		4.4876	10.581	1.3132	1.9967	2.5356	46.582	3.53	3.7289		0.88278	0.93965	2.364	2.0183	1.31	4.4815	1.9166	11.727		917.35	71.388	176.09	127.27	127.23	130.85	94.299	288.38		1.7042	30.994	6.2516	0.72578
247.673	4.6701	0.14202	11.754	9.9766	6.0976	1.6513	4.9441	9.1865		2.8667	46.176	4.2452	4.2963	0.85695	2.3662	3.1134	5.7652		4.8494	10.367	1.3445	2.0231	2.6143	46.956	3.4726	3.8015		0.90589	0.94907	2.5033	2.0482	1.3963	4.4844	1.9575	11.645		870.62	69.687	177.57	123.49	123.28	115.21	92.491	293.51		1.7915	31.252	6.4548	0.65584
248.192	4.5789	0.14143	11.464	9.251	5.9235	1.6463	4.96	9.6932		2.8366	45.92	4.0322	4.2886	0.83665	2.2629	3.2816	6.0719		5.245	10.259	1.3732	2.0413	2.6919	47.1	3.4316	3.8628		0.93082	0.95789	2.6368	2.0789	1.4913	4.482	1.9937	11.564		824.95	68.32	179.02	119.33	118.96	100.24	90.864	297.95		1.8745	31.938	6.6913	0.61265
248.712	4.4728	0.14059	11.173	8.5061	5.7432	1.6406	4.9803	10.185		2.8129	45.421	3.8129	4.2831	0.83224	2.1538	3.4455	6.3788		5.6712	10.258	1.3987	2.0515	2.7681	47.013	3.4082	3.9116		0.95707	0.96606	2.7627	2.1093	1.5945	4.4745	2.0246	11.488		780.71	67.349	180.47	114.82	114.34	86.087	89.395	301.58		1.9513	33.036	6.9482	0.59912
249.231	4.3556	0.13952	10.882	7.7534	5.5575	1.6344	5.0042	10.653		2.7969	44.694	3.5897	4.2807	0.84366	2.0408	3.6012	6.6823		6.1241	10.366	1.4209	2.054	2.8422	46.696	3.4034	3.9471		0.98408	0.97354	2.8793	2.1382	1.705	4.4621	2.0501	11.419		738.22	66.83	181.9	110	109.52	72.878	88.059	304.31		2.0205	34.523	7.2132	0.61792
249.75	4.2319	0.13823	10.596	7.0037	5.3676	1.6276	5.0308	11.088		2.7899	43.757	3.3646	4.2818	0.8706	1.9261	3.745	6.979		6.5985	10.581	1.4393	2.0496	2.9137	46.155	3.4178	3.9687		1.0113	0.98025	2.9851	2.1646	1.822	4.4455	2.0701	11.363		697.72	66.809	183.33	104.91	104.58	60.728	86.827	306.04		2.081	36.371	7.4746	0.67145
250.269	4.1063	0.13674	10.316	6.267	5.1744	1.6204	5.0594	11.484		2.793	42.632	3.14	4.2872	0.91258	1.8117	3.8736	7.2655		7.0885	10.901	1.4537	2.0393	2.9819	45.399	3.4519	3.9764		1.0381	0.98612	3.0787	2.1875	1.9442	4.425	2.0847	11.321		659.4	67.327	184.73	99.609	99.606	49.731	85.671	306.68		2.1321	38.549	7.7218	0.76175
250.789	3.9837	0.13509	10.046	5.5527	4.9789	1.6129	5.0892	11.833		2.8069	41.342	2.9178	4.2972	0.96893	1.6999	3.9839	7.5387		7.5872	11.322	1.4637	2.0242	3.0462	44.44	3.5057	3.9702		1.0639	0.99108	3.1588	2.2062	2.0705	4.4012	2.0943	11.296		623.39	68.412	186.07	94.134	94.673	39.959	84.56	306.17		2.1735	41.019	7.945	0.89048
251.308	3.8694	0.13331	9.7882	4.8688	4.7821	1.6052	5.1195	12.131		2.8323	39.91	2.7004	4.3123	1.0388	1.5931	4.0734	7.7957		8.0871	11.837	1.4692	2.0056	3.106	43.293	3.5791	3.9507		1.0882	0.99504	3.2243	2.2201	2.1994	4.3748	2.0995	11.289		589.77	70.083	187.32	88.532	89.846	31.464	83.464	304.42		2.205	43.742	8.1359	1.0589
251.827	3.7684	0.13144	9.5434	4.2222	4.5851	1.5973	5.1497	12.374		2.8696	38.361	2.4898	4.3327	1.1211	1.4937	4.14	8.0338		8.58	12.439	1.4701	1.9851	3.1605	41.978	3.6716	3.9186		1.1103	0.99789	3.2746	2.2288	2.3295	4.3463	2.1008	11.298		558.56	72.346	188.43	82.852	85.18	24.278	82.356	301.41		2.227	46.674	8.2873	1.2677
252.346	3.6856	0.12951	9.313	3.6186	4.3888	1.5895	5.179	12.557		2.9187	36.722	2.2883	4.3587	1.2148	1.4038	4.1821	8.2508		9.0573	13.119	1.4662	1.9642	3.2091	40.516	3.7822	3.8751		1.13	0.99952	3.3091	2.2319	2.4591	4.3165	2.0992	11.325		529.73	75.198	189.36	77.138	80.721	18.412	81.208	297.1		2.2399	49.768	8.3934	1.5172
252.865	3.6256	0.12758	9.0976	3.0627	4.1945	1.5817	5.2071	12.679		2.9795	35.017	2.0981	4.3902	1.3186	1.3257	4.199	8.4447		9.51	13.866	1.4578	1.9445	3.2513	38.928	3.9101	3.8214		1.1467	0.99979	3.3275	2.2295	2.5866	4.2858	2.0954	11.365		503.21	78.622	190.05	71.435	76.507	13.858	79.995	291.49		2.2443	52.977	8.4501	1.8072
253.385	3.5929	0.12568	8.8973	2.5575	4.0033	1.5741	5.2334	12.739		3.0514	33.273	1.9214	4.4274	1.4309	1.2613	4.1902	8.614		9.9293	14.668	1.445	1.9275	3.2865	37.239	4.0538	3.759		1.1601	0.99858	3.3298	2.2216	2.7104	4.2549	2.0903	11.416		478.9	82.591	190.44	65.788	72.563	10.591	78.693	284.58		2.2411	56.251	8.4544	2.1369
253.904	3.5911	0.12385	8.7116	2.1051	3.8164	1.5668	5.2575	12.737		3.1334	31.513	1.7604	4.4701	1.5503	1.2125	4.1559	8.7572		10.307	15.512	1.4279	1.9146	3.3144	35.475	4.2118	3.6896		1.1699	0.99575	3.3165	2.2084	2.8289	4.2243	2.0849	11.473		456.65	87.069	190.48	60.238	68.908	8.5687	77.284	276.42		2.2311	59.537	8.4049	2.5051
254.423	3.6234	0.12215	8.5397	1.7066	3.6351	1.56	5.2791	12.674		3.2244	29.761	1.6174	4.518	1.6752	1.1808	4.0971	8.8737		10.634	16.384	1.4071	1.907	3.3347	33.662	4.3821	3.6149		1.176	0.99116	3.2881	2.1904	2.9404	4.1943	2.0801	11.533		436.31	92.009	190.09	54.823	65.549	7.7354	75.747	267.07		2.2155	62.785	8.3015	2.9101
254.942	3.6923	0.1206	8.3804	1.3617	3.4605	1.5537	5.298	12.552		3.3229	28.041	1.4947	4.5708	1.8038	1.1674	4.015	8.9628		10.903	17.267	1.383	1.9057	3.3471	31.825	4.5627	3.5368		1.1783	0.98469	3.2455	2.168	3.0436	4.1653	2.0766	11.589		417.69	97.359	189.23	49.581	62.49	8.0222	74.07	256.61		2.1951	65.943	8.1453	3.3495
255.462	3.7994	0.11925	8.2325	1.0695	3.2941	1.5481	5.3141	12.372		3.4271	26.372	1.3946	4.6281	1.9343	1.1732	3.9115	9.0244		11.109	18.147	1.3562	1.9118	3.3516	29.989	4.7514	3.4572		1.1769	0.97624	3.1899	2.1416	3.1371	4.1376	2.0752	11.637		400.61	103.06	187.84	44.544	59.724	9.3499	72.239	245.15		2.1711	68.962	7.9389	3.821
255.981	3.9456	0.11813	8.0944	0.82814	3.1369	1.5432	5.3273	12.14		3.535	24.773	1.3194	4.6892	2.0649	1.1985	3.7888	9.0586		11.245	19.007	1.3275	1.9256	3.3483	28.178	4.9458	3.3781		1.1719	0.96574	3.1227	2.112	3.2197	4.1114	2.0763	11.672		384.88	109.04	185.87	39.743	57.243	11.63	70.246	232.83		2.1442	71.792	7.6856	4.3214
256.5	4.1306	0.11728	7.9645	0.63514	2.9902	1.5393	5.3376	11.858		3.6444	23.262	1.2714	4.7534	2.1937	1.2435	3.6495	9.0659		11.308	19.83	1.2975	1.9475	3.3372	26.413	5.1436	3.3013		1.1634	0.95317	3.0455	2.0797	3.2904	4.0871	2.0803	11.69		370.31	115.24	183.28	35.205	55.033	14.769	68.082	219.79		2.1155	74.389	7.3899	4.8476
257.019	4.3534	0.11671	7.8414	0.4875	2.8553	1.5365	5.3452	11.531		3.7528	21.851	1.2528	4.82	2.319	1.3078	3.4963	9.047		11.295	20.6	1.2672	1.9777	3.3186	24.715	5.3422	3.2287		1.1518	0.93855	2.9601	2.0454	3.3482	4.0649	2.0874	11.687		356.71	121.58	180.03	30.954	53.076	18.666	65.745	206.21		2.0856	76.709	7.0569	5.3959
257.538	4.612	0.11645	7.7236	0.38183	2.7332	1.5348	5.3502	11.165		3.8579	20.552	1.2657	4.888	2.4388	1.3906	3.3322	9.0029		11.207	21.302	1.2374	2.0158	3.2926	23.102	5.5392	3.1622		1.1374	0.92197	2.8687	2.0097	3.3927	4.0451	2.0976	11.659		343.94	127.99	176.1	27.008	51.354	23.22	63.232	192.27		2.0552	78.714	6.6925	5.9629
258.058	4.9033	0.11651	7.6098	0.3145	2.625	1.5344	5.353	10.764		3.9571	19.372	1.312	4.9565	2.5515	1.4906	3.1603	8.9348		11.043	21.922	1.2089	2.0615	3.2597	21.591	5.7323	3.1034		1.1207	0.90359	2.7732	1.9731	3.4233	4.028	2.1106	11.606		331.84	134.41	171.47	23.385	49.844	28.328	60.542	178.15		2.0249	80.369	6.3028	6.5449
258.577	5.2235	0.11689	7.499	0.28177	2.5319	1.5354	5.3539	10.334		4.048	18.318	1.3937	5.0243	2.6554	1.6061	2.9837	8.8441		10.807	22.447	1.1827	2.114	3.2201	20.196	5.9191	3.0542		1.1021	0.88364	2.6759	1.9362	3.44	4.014	2.1261	11.528		320.3	140.75	166.13	20.096	48.526	33.887	57.68	164.06		1.9952	81.643	5.8945	7.1382
259.096	5.5679	0.11761	7.3903	0.2799	2.4548	1.5379	5.3533	9.8817		4.1282	17.39	1.5121	5.0904	2.749	1.7352	2.8052	8.7326		10.503	22.865	1.1595	2.1725	3.1742	18.93	6.0977	3.0161		1.0822	0.86244	2.5789	1.8996	3.4427	4.0033	2.1436	11.426		309.23	146.94	160.12	17.15	47.376	39.797	54.647	150.2		1.9664	82.512	5.4741	7.7392
259.615	5.9311	0.11865	7.2833	0.30524	2.3946	1.5419	5.3516	9.4115		4.1954	16.587	1.6685	5.1536	2.831	1.8755	2.6276	8.602		10.136	23.168	1.14	2.236	3.1223	17.802	6.266	2.9906		1.0615	0.84041	2.4846	1.8636	3.4318	3.9963	2.1623	11.302		298.57	152.94	153.45	14.552	46.373	45.962	51.452	136.75		1.9386	82.958	5.048	8.3448
260.135	6.3072	0.12	7.1779	0.35437	2.3521	1.5475	5.3493	8.9294		4.2475	15.907	1.8636	5.2127	2.9002	2.0243	2.4536	8.4543		9.7125	23.35	1.125	2.3031	3.0648	16.823	6.4225	2.9791		1.0404	0.81802	2.3949	1.8286	3.4078	3.9932	2.1817	11.16		288.28	158.67	146.16	12.305	45.495	52.291	48.101	123.92		1.9121	82.966	4.6227	8.9518
260.654	6.6896	0.12165	7.0741	0.4241	2.3279	1.5547	5.3467	8.4409		4.283	15.341	2.0978	5.2666	2.9558	2.1787	2.2854	8.2916		9.2416	23.406	1.1149	2.3728	3.0021	15.999	6.5657	2.9829		1.0195	0.79586	2.3118	1.7951	3.3714	3.9942	2.2008	11.006		278.37	164.07	138.33	10.406	44.719	58.697	44.606	111.86		1.8867	82.533	4.204	9.5577
261.173	7.0718	0.12358	6.9726	0.51158	2.3226	1.5634	5.3444	7.9511		4.3001	14.884	2.3707	5.3142	2.9972	2.3356	2.125	8.1159		8.7314	23.334	1.1102	2.4435	2.9346	15.336	6.6945	3.0032		0.99923	0.77456	2.2371	1.7634	3.3238	3.9994	2.2189	10.844		268.86	169.1	130.02	8.85	44.026	65.101	40.981	100.75		1.8624	81.658	3.7974	10.16
261.692	7.4467	0.12575	6.8743	0.61431	2.3366	1.5737	5.3427	7.465		4.2979	14.524	2.6815	5.3546	3.0242	2.4918	1.9742	7.9297		8.1914	23.137	1.1111	2.514	2.8627	14.839	6.8082	3.0409		0.98006	0.75483	2.1724	1.7339	3.2659	4.0085	2.2353	10.681		259.82	173.71	121.33	7.63	43.394	71.431	37.242	90.723		1.839	80.353	3.4078	10.757
262.212	7.8078	0.12814	6.7804	0.73011	2.37	1.5854	5.3418	6.9873		4.2757	14.251	3.0286	5.387	3.0366	2.6441	1.8342	7.7351		7.6313	22.818	1.1178	2.583	2.7869	14.512	6.9063	3.0971		0.96235	0.73742	2.1189	1.7068	3.1991	4.0215	2.2494	10.524		251.33	177.86	112.38	6.7351	42.806	77.621	33.409	81.89		1.8162	78.634	3.0395	11.347
262.731	8.1485	0.13071	6.6927	0.85719	2.4225	1.5985	5.342	6.5222		4.233	14.054	3.4095	5.4106	3.0348	2.7891	1.706	7.5346		7.0609	22.384	1.1302	2.649	2.7075	14.355	6.9888	3.1723		0.94639	0.72311	2.0776	1.6826	3.125	4.0379	2.2606	10.379		243.5	181.51	103.26	6.1526	42.244	83.612	29.508	74.347		1.7938	76.526	2.6962	11.928
263.25	8.4627	0.13342	6.6131	0.9941	2.4939	1.6127	5.3434	6.0738		4.17	13.923	3.8214	5.4251	3.0195	2.9239	1.5902	7.3303		6.4899	21.843	1.1482	2.7109	2.6252	14.371	7.0557	3.2671		0.93245	0.71267	2.0492	1.6616	3.0451	4.0572	2.2686	10.252		236.45	184.64	94.131	5.8673	41.691	89.354	25.566	68.163		1.7713	74.064	2.3808	12.5
263.769	8.7449	0.13622	6.5438	1.1396	2.5833	1.6279	5.3458	5.6459		4.0873	13.846	4.2602	5.43	2.9916	3.0456	1.4872	7.1247		5.928	21.208	1.1715	2.7676	2.5404	14.557	7.1074	3.3817		0.9207	0.70688	2.0341	1.6443	2.961	4.0789	2.2729	10.149		230.32	187.21	85.112	5.8624	41.133	94.802	21.617	63.379		1.7484	71.287	2.0955	13.062
264.288	8.9902	0.13907	6.4871	1.293	2.6896	1.6438	5.3492	5.2418		3.9858	13.816	4.7215	5.4253	2.9522	3.1513	1.3969	6.9199		5.384	20.491	1.1995	2.8181	2.4538	14.91	7.1448	3.5161		0.91124	0.70645	2.0322	1.6311	2.8746	4.1024	2.2736	10.075		225.26	189.22	76.351	6.1197	40.555	99.92	17.699	60.01		1.7246	68.243	1.8419	13.612
264.808	9.1946	0.14192	6.4457	1.4533	2.8114	1.6602	5.3534	4.8648		3.8668	13.825	5.1998	5.4112	2.9026	3.2389	1.3191	6.7183		4.8664	19.706	1.2319	2.8616	2.3659	15.427	7.1685	3.6703		0.90412	0.71207	2.0433	1.6223	2.7876	4.1268	2.2706	10.032		221.42	190.64	67.993	6.6197	39.945	104.68	13.855	58.044		1.6997	64.983	1.6208	14.15
265.327	9.3548	0.14473	6.422	1.6203	2.9468	1.6768	5.358	4.5176		3.7322	13.869	5.6892	5.388	2.8445	3.3064	1.2533	6.5218		4.3827	18.871	1.2678	2.8975	2.2775	16.101	7.1795	3.8436		0.89931	0.7243	2.0667	1.6185	2.7016	4.1516	2.2641	10.023		218.96	191.47	60.179	7.3423	39.292	109.04	10.131	57.443		1.6733	61.564	1.4325	14.675
265.846	9.4685	0.14744	6.4187	1.7934	3.0935	1.6934	5.3626	4.2027		3.584	13.947	6.1833	5.3562	2.7795	3.3523	1.1986	6.3324		3.9397	18.002	1.3066	2.9252	2.1891	16.922	7.1789	4.0353		0.89672	0.74364	2.1015	1.62	2.6183	4.176	2.2541	10.048		218.01	191.7	53.049	8.2667	38.586	113	6.58	58.148		1.645	58.044	1.2766	15.184
266.365	9.5345	0.15001	6.4381	1.9724	3.249	1.7096	5.3668	3.9223		3.4245	14.06	6.675	5.3165	2.7094	3.3755	1.1544	6.1521		3.543	17.115	1.3474	2.9445	2.1017	17.878	7.1678	4.2444		0.89621	0.77046	2.1465	1.6272	2.5392	4.1996	2.2411	10.108		218.7	191.34	46.733	9.3721	37.818	116.54	3.2586	60.075		1.6147	54.481	1.1523	15.676
266.885	9.552	0.15238	6.4826	2.157	3.4106	1.7251	5.3703	3.6785		3.2564	14.212	7.1572	5.2697	2.6358	3.3754	1.1195	5.9824		3.1973	16.227	1.3896	2.9552	2.0157	18.957	7.1474	4.4697		0.89759	0.805	2.2001	1.6404	2.4656	4.2218	2.2253	10.2		221.13	190.37	41.351	10.638	36.981	119.65	0.22726	63.12		1.5822	50.932	1.0582	16.15
267.404	9.5216	0.15453	6.554	2.3468	3.5751	1.7396	5.3725	3.4729		3.0824	14.41	7.6223	5.2167	2.5605	3.3521	1.0929	5.8249		2.906	15.355	1.4323	2.9573	1.9321	20.142	7.1187	4.7096		0.90064	0.84736	2.2606	1.6598	2.3986	4.2424	2.2071	10.322		225.39	188.83	37.008	12.043	36.071	122.32	-2.4498	67.163		1.5475	47.454	0.99252	16.602
267.923	9.4443	0.15639	6.6539	2.5416	3.7394	1.7529	5.3734	3.3071		2.9054	14.667	8.0629	5.1585	2.4851	3.3059	1.0736	5.6808		2.6717	14.514	1.4747	2.951	1.8514	21.415	7.0828	4.9624		0.90511	0.89751	2.3262	1.6854	2.3392	4.2613	2.1868	10.469		231.54	186.7	33.795	13.567	35.086	124.54	-4.7057	72.068		1.5106	44.096	0.9532	17.031
268.442	9.322	0.15796	6.7836	2.7409	3.9	1.7648	5.3725	3.1821		2.7282	14.995	8.4717	5.0964	2.4111	3.2378	1.0604	5.5511		2.4955	13.717	1.5163	2.9365	1.7744	22.755	7.0406	5.2262		0.91075	0.95529	2.3949	1.7173	2.2879	4.2783	2.1649	10.637		239.59	184.02	31.781	15.192	34.026	126.33	-6.471	77.688		1.4716	40.904	0.93792	17.432
268.962	9.1572	0.15918	6.9435	2.9442	4.0537	1.7749	5.3697	3.0992		2.5537	15.409	8.8418	5.0314	2.3397	3.1492	1.0522	5.4366		2.3778	12.979	1.5564	2.9141	1.7016	24.139	6.9931	5.4989		0.91729	1.0204	2.4646	1.7555	2.2451	4.2938	2.1417	10.82		249.53	180.79	31.015	16.897	32.894	127.68	-7.6755	83.867		1.4307	37.917	0.94419	17.803
269.481	8.953	0.16004	7.1338	3.1509	4.1972	1.7833	5.3649	3.0592		2.3848	15.928	9.1667	4.9645	2.2719	3.0419	1.0481	5.3377		2.3178	12.308	1.5947	2.8843	1.6336	25.543	6.9409	5.778		0.92448	1.0924	2.5332	1.7995	2.2107	4.3078	2.1174	11.014		261.33	177.04	31.524	18.665	31.698	128.6	-8.249	90.444		1.3884	35.168	0.96938	18.142
270	8.713	0.16052	7.3537	3.3602	4.3276	1.7896	5.3582	3.0629		2.224	16.568	9.4407	4.897	2.2085	2.918	1.0471	5.2547		2.3136	11.714	1.6309	2.8475	1.5706	26.943	6.8847	6.0613		0.93209	1.1708	2.5986	1.849	2.1845	4.3206	2.0925	11.212		274.89	172.79	33.313	20.478	30.448	129.1	-8.1226	97.256		1.3449	32.68	1.0108	18.444
270.519	8.4411	0.16061	7.6019	3.5711	4.4419	1.7938	5.3496	3.1109		2.0738	17.349	9.6586	4.8297	2.1501	2.7801	1.0484	5.1875		2.3628	11.203	1.6647	2.8042	1.5131	28.312	6.8251	6.346		0.93991	1.2549	2.6587	1.9035	2.166	4.3326	2.0672	11.41		290.1	168.07	36.36	22.32	29.159	129.2	-7.2303	104.14		1.3006	30.469	1.0659	18.707
271.038	8.1416	0.16031	7.8762	3.7828	4.5377	1.7959	5.3391	3.2036		1.9365	18.288	9.8166	4.7635	2.0969	2.6308	1.0512	5.1358		2.462	10.779	1.6964	2.755	1.4612	29.625	6.7623	6.6295		0.94778	1.3441	2.7117	1.9621	2.1543	4.3439	2.0416	11.603		306.82	162.92	40.62	24.175	27.849	128.91	-5.5106	110.94		1.2562	28.545	1.1319	18.928
271.558	7.8191	0.15963	8.1738	3.9939	4.613	1.7959	5.3268	3.3413		1.8139	19.399	9.9116	4.6991	2.0489	2.4731	1.0548	5.099		2.6073	10.444	1.7259	2.7005	1.4151	30.857	6.6967	6.9091		0.95556	1.4375	2.7558	2.0242	2.1484	4.3548	2.016	11.787		324.87	157.36	46.026	26.028	26.539	128.25	-2.9085	117.51		1.2121	26.908	1.2065	19.104
272.077	7.4784	0.15857	8.4909	4.2031	4.666	1.7937	5.3129	3.5242		1.7076	20.697	9.9418	4.637	2.0059	2.3099	1.0585	5.0762		2.7942	10.198	1.7537	2.6414	1.3745	31.985	6.6282	7.182		0.96314	1.5345	2.7897	2.0886	2.1471	4.3652	1.9907	11.959		344.05	151.42	52.486	27.864	25.255	127.25	0.62308	123.7		1.1687	25.551	1.2871	19.235
272.596	7.1245	0.15716	8.8233	4.4089	4.6958	1.7894	5.2974	3.7522		1.6191	22.191	9.9066	4.5775	1.9673	2.1443	1.062	5.0666		3.0179	10.037	1.78	2.5784	1.3396	32.986	6.5569	7.4454		0.97047	1.6341	2.8122	2.1542	2.1491	4.3751	1.9657	12.118		364.16	145.16	59.888	29.669	24.025	125.92	5.121	129.39		1.1266	24.462	1.3715	19.318
273.115	6.7623	0.15542	9.1658	4.6098	4.7015	1.7831	5.2803	4.0248		1.5491	23.885	9.8066	4.5207	1.9327	1.9792	1.0647	5.0688		3.2734	9.9564	1.8054	2.5121	1.31	33.844	6.4827	7.6968		0.97753	1.7356	2.8224	2.2199	2.1529	4.3843	1.9413	12.261		384.94	138.62	68.101	31.431	22.879	124.3	10.61	134.46		1.0863	23.621	1.4576	19.353
273.635	6.3969	0.15338	9.5128	4.8038	4.6831	1.7748	5.2618	4.3415		1.4983	25.782	9.6437	4.4666	1.9013	1.8177	1.0663	5.0815		3.5555	9.9503	1.8304	2.4434	1.2854	34.541	6.4052	7.9336		0.98431	1.8382	2.8198	2.2844	2.1572	4.3924	1.9177	12.391		406.18	131.83	76.979	33.137	21.852	122.41	17.102	138.81		1.0482	23.006	1.5436	19.34
274.154	6.0333	0.15107	9.858	4.9891	4.6408	1.7649	5.2416	4.7011		1.4669	27.877	9.4208	4.4151	1.8724	1.6623	1.0664	5.1034		3.8589	10.01	1.8555	2.3729	1.2657	35.067	6.3243	8.1534		0.99087	1.9411	2.8044	2.3465	2.1606	4.3988	1.895	12.506		427.6	124.84	86.361	34.775	20.975	120.29	24.591	142.37		1.0127	22.589	1.6278	19.282
274.673	5.6764	0.14855	10.195	5.1635	4.5755	1.7533	5.2199	5.102		1.4548	30.158	9.1418	4.3657	1.845	1.5158	1.0649	5.1327		4.1785	10.126	1.8812	2.3015	1.2504	35.413	6.2397	8.354		0.99725	2.0437	2.7763	2.4048	2.162	4.4031	1.8734	12.609		448.97	117.71	96.076	36.335	20.283	117.98	33.059	145.06		0.98002	22.339	1.7087	19.178
275.192	5.3308	0.14584	10.516	5.3251	4.4883	1.7403	5.1965	5.5421		1.4614	32.612	8.812	4.3182	1.8186	1.3803	1.0615	5.168		4.5093	10.288	1.908	2.2299	1.2392	35.577	6.1511	8.5336		1.0035	2.1453	2.7363	2.4582	2.1602	4.4045	1.8532	12.703		470.05	110.49	105.95	37.805	19.808	115.5	42.464	146.86		0.95052	22.225	1.785	19.034
275.712	5.0009	0.143	10.814	5.4716	4.3807	1.726	5.1714	6.0188		1.4859	35.214	8.4371	4.272	1.7924	1.258	1.0562	5.2074		4.8465	10.486	1.9362	2.1589	1.2319	35.56	6.0583	8.6904		1.0098	2.2451	2.6851	2.5054	2.1543	4.4022	1.8346	12.789		490.59	103.23	115.8	39.177	19.581	112.9	52.75	147.73		0.92439	22.213	1.8559	18.854
276.231	4.6907	0.14006	11.083	5.6009	4.2548	1.7107	5.1443	6.5287		1.5273	37.939	8.0237	4.2266	1.7658	1.1504	1.0488	5.2494		5.1855	10.706	1.966	2.0892	1.2282	35.366	5.9614	8.8233		1.0162	2.3428	2.6242	2.5454	2.1438	4.3957	1.8178	12.871		510.38	95.994	125.44	40.442	19.631	110.22	63.841	147.68		0.90177	22.272	1.9205	18.642
276.75	4.4037	0.13709	11.315	5.7108	4.1125	1.6945	5.1152	7.068		1.5842	40.755	7.579	4.1817	1.7386	1.0591	1.0395	5.2921		5.522	10.939	1.9976	2.0215	1.2277	35.006	5.8603	8.9312		1.0227	2.4376	2.5549	2.5773	2.128	4.3842	1.803	12.95		529.2	88.837	134.72	41.593	19.981	107.49	75.64	146.71		0.88274	22.371	1.9784	18.405
277.269	4.1429	0.13411	11.503	5.7994	3.9564	1.6777	5.0839	7.6319		1.6551	43.623	7.1104	4.1368	1.7104	0.98507	1.0282	5.3337		5.8519	11.173	2.031	1.9565	1.2304	34.493	5.7554	9.0135		1.0294	2.529	2.4789	2.6004	2.1069	4.3671	1.7904	13.03		546.86	81.82	143.46	42.624	20.65	104.76	88.035	144.86		0.86735	22.482	2.0295	18.15
277.788	3.9108	0.13119	11.643	5.8649	3.7892	1.6605	5.0501	8.2153		1.7381	46.505	6.6258	4.0916	1.6813	0.92899	1.0152	5.3724		6.1714	11.397	2.0659	1.8946	1.236	33.844	5.6471	9.07		1.0364	2.6164	2.3981	2.614	2.0804	4.344	1.7802	13.113		563.19	75.004	151.52	43.529	21.653	102.05	100.89	142.19		0.85557	22.578	2.0739	17.886
278.308	3.7091	0.12836	11.73	5.9058	3.6134	1.643	5.0137	8.8122		1.8313	49.355	6.1327	4.0459	1.6516	0.89125	1.0006	5.4063		6.4771	11.603	2.102	1.8363	1.2445	33.079	5.536	9.1007		1.0437	2.6993	2.3143	2.618	2.0488	4.3145	1.7726	13.198		578.03	68.449	158.77	44.306	22.997	99.418	114.07	138.76		0.84732	22.637	2.1119	17.62
278.827	3.5391	0.12566	11.759	5.9209	3.4322	1.6255	4.9745	9.4163		1.9329	52.129	5.6389	3.9996	1.6215	0.87189	0.98484	5.4336		6.7658	11.782	2.1389	1.782	1.2558	32.221	5.4229	9.106		1.0512	2.777	2.2294	2.6121	2.0125	4.2783	1.7676	13.289		591.26	62.213	165.08	44.953	24.683	96.885	127.41	134.66		0.8425	22.642	2.1442	17.36
279.346	3.4011	0.12313	11.728	5.9093	3.2484	1.6081	4.9324	10.021		2.0407	54.781	5.1517	3.9525	1.5917	0.87061	0.96832	5.4525		7.0345	11.927	2.1757	1.732	1.2698	31.295	5.3087	9.0866		1.059	2.8488	2.1453	2.5965	1.9721	4.2354	1.7653	13.384		602.77	56.356	170.38	45.469	26.704	94.484	140.74	129.97		0.84093	22.576	2.1718	17.117
279.865	3.295	0.1208	11.637	5.8708	3.0651	1.5911	4.8875	10.618		2.1527	57.265	4.6779	3.9045	1.5629	0.88684	0.95157	5.4613		7.2807	12.033	2.2119	1.6865	1.2863	30.325	5.1945	9.0435		1.0668	2.914	2.0639	2.5715	1.9283	4.1858	1.7657	13.483		612.46	50.932	174.58	45.855	29.047	92.239	153.89	124.81		0.84241	22.429	2.1958	16.897
280.385	3.2201	0.1187	11.485	5.8056	2.8852	1.5746	4.8399	11.201		2.267	59.536	4.2239	3.8558	1.536	0.91971	0.93525	5.4582		7.5021	12.094	2.2464	1.6456	1.3054	29.337	5.0816	8.9776		1.0745	2.972	1.9868	2.5379	1.8818	4.1297	1.7687	13.585		620.27	45.994	177.65	46.116	31.69	90.172	166.68	119.28		0.84668	22.194	2.2177	16.708
280.904	3.175	0.11686	11.276	5.7143	2.7119	1.5588	4.7899	11.763		2.3816	61.554	3.7954	3.8062	1.5119	0.96809	0.92015	5.4417		7.697	12.108	2.2783	1.6094	1.3267	28.358	4.9712	8.8905		1.082	3.0218	1.9155	2.4964	1.8335	4.0674	1.7743	13.689		626.15	41.589	179.56	46.254	34.606	88.296	178.93	113.51		0.85346	21.868	2.239	16.556
281.423	3.1576	0.11529	11.012	5.5983	2.5478	1.5437	4.738	12.295		2.4947	63.282	3.3972	3.7557	1.4915	1.0306	0.90719	5.4107		7.864	12.073	2.3067	1.5778	1.3501	27.409	4.8649	8.7836		1.0891	3.0629	1.8513	2.4482	1.7843	3.9993	1.7822	13.793		630.07	37.758	180.3	46.275	37.761	86.619	190.46	107.61		0.8624	21.451	2.2613	16.447
281.942	3.1656	0.11401	10.699	5.4595	2.3957	1.5296	4.6851	12.791		2.6047	64.688	3.0335	3.7044	1.4758	1.1058	0.89739	5.364		8.0024	11.99	2.3304	1.5506	1.3752	26.513	4.7642	8.6587		1.0954	3.0944	1.7952	2.3945	1.735	3.926	1.7922	13.894		632.02	34.54	179.91	46.186	41.112	85.142	201.12	101.71		0.87314	20.948	2.2866	16.383
282.462	3.1962	0.11302	10.342	5.3002	2.2581	1.5166	4.6321	13.244		2.7102	65.746	2.7074	3.6522	1.4656	1.1919	0.89192	5.3009		8.1121	11.86	2.3485	1.5279	1.4018	25.689	4.6705	8.5174		1.1008	3.1157	1.7482	2.3367	1.6862	3.8479	1.804	13.991		632	31.964	178.43	45.994	44.616	83.859	210.76	95.925		0.88529	20.364	2.3166	16.367
282.981	3.2463	0.11234	9.9498	5.1234	2.1372	1.5046	4.5803	13.647		2.8098	66.436	2.4215	3.5991	1.4619	1.2872	0.89205	5.2211		8.1936	11.683	2.3601	1.5094	1.4293	24.95	4.5853	8.3619		1.105	3.1264	1.7107	2.2763	1.6387	3.7658	1.8172	14.08		630.04	30.053	175.91	45.707	48.223	82.756	219.23	90.365		0.89844	19.711	2.353	16.398
283.5	3.3125	0.11194	9.5299	4.9325	2.0349	1.4938	4.5311	13.997		2.9026	66.747	2.1773	3.5449	1.4651	1.3897	0.89917	5.1245		8.2483	11.464	2.3644	1.4948	1.4572	24.307	4.51	8.194		1.1076	3.1259	1.683	2.2148	1.5931	3.6803	1.8314	14.16		626.16	28.821	172.45	45.334	51.878	81.815	226.41	85.138		0.91216	18.999	2.3976	16.475
284.019	3.3915	0.11184	9.0918	4.7314	1.9527	1.4842	4.4864	14.287		2.9876	66.675	1.9755	3.4895	1.4758	1.4976	0.91471	5.0116		8.2782	11.206	2.3609	1.4838	1.485	23.768	4.4458	8.0159		1.1084	3.1141	1.665	2.1539	1.5498	3.5922	1.8461	14.229		620.41	28.275	168.13	44.885	55.527	81.008	232.22	80.337		0.92603	18.245	2.4518	16.591
284.538	3.4797	0.11202	8.6451	4.5241	1.8917	1.4759	4.4478	14.514		3.0643	66.223	1.8162	3.433	1.4943	1.6088	0.94018	4.883		8.2862	10.912	2.3491	1.4761	1.512	23.335	4.3938	7.8298		1.1072	3.0907	1.6566	2.095	1.509	3.5023	1.8609	14.285		612.84	28.414	163.07	44.367	59.114	80.305	236.56	76.047		0.93964	17.464	2.5167	16.743
285.058	3.5739	0.11245	8.1998	4.3152	1.8525	1.4688	4.4173	14.676		3.1323	65.402	1.6987	3.375	1.5207	1.7217	0.97706	4.74		8.2759	10.587	2.3288	1.4714	1.5376	23.005	4.3547	7.6377		1.1037	3.056	1.6572	2.0395	1.4712	3.4113	1.8752	14.328		603.5	29.227	157.39	43.79	62.583	79.674	239.38	72.334		0.9526	16.676	2.5933	16.921
285.577	3.6707	0.11311	7.7662	4.1092	1.8352	1.4628	4.397	14.771		3.1912	64.229	1.6215	3.3155	1.5547	1.8342	1.0268	4.5841		8.2515	10.237	2.2999	1.4691	1.5612	22.773	4.329	7.4418		1.0977	3.01	1.6659	1.9887	1.4363	3.3201	1.8883	14.357		592.48	30.695	151.2	43.162	65.879	79.076	240.65	69.252		0.96459	15.902	2.6821	17.117
286.096	3.7672	0.11399	7.3541	3.9105	1.8395	1.4581	4.3886	14.8		3.2411	62.728	1.583	3.2544	1.5959	1.9449	1.0909	4.4172		8.2179	9.8659	2.2628	1.4688	1.5821	22.628	4.3169	7.2442		1.0893	2.9534	1.6819	1.9436	1.4045	3.2295	1.8998	14.372		579.84	32.791	144.65	42.491	68.95	78.476	240.37	66.838		0.97529	15.163	2.7831	17.32
286.615	3.8607	0.11505	6.9735	3.7238	1.8646	1.4545	4.3941	14.763		3.2819	60.928	1.5807	3.1917	1.6437	2.0521	1.1704	4.2415		8.1804	9.4792	2.2178	1.4699	1.5998	22.559	4.3181	7.0468		1.0782	2.8865	1.704	1.905	1.3756	3.1402	1.9089	14.374		565.67	35.481	137.85	41.783	71.747	77.838	238.54	65.11		0.98449	14.481	2.896	17.521
287.135	3.9488	0.11627	6.6333	3.5534	1.909	1.452	4.4152	14.662		3.3139	58.862	1.612	3.1272	1.6972	2.1544	1.2665	4.0594		8.1446	9.0821	2.1657	1.472	1.6139	22.549	4.3321	6.8513		1.0647	2.8103	1.7309	1.8736	1.3498	3.0529	1.9151	14.364		550.05	38.723	130.94	41.045	74.226	77.129	235.21	64.071		0.99202	13.881	3.0199	17.708
287.654	4.0295	0.1176	6.3423	3.4034	1.9709	1.4505	4.4534	14.501		3.3373	56.567	1.6738	3.061	1.7552	2.2506	1.38	3.8735		8.1161	8.6801	2.1073	1.4745	1.6239	22.582	4.3582	6.6595		1.0488	2.7255	1.7612	1.8497	1.3268	2.9685	1.9178	14.344		533.08	42.468	124.04	40.282	76.348	76.319	230.44	63.707		0.99781	13.386	3.1534	17.87
288.173	4.1012	0.11903	6.1078	3.2773	2.0482	1.4499	4.51	14.284		3.3524	54.083	1.7629	2.9933	1.8164	2.3396	1.5115	3.6863		8.1006	8.2787	2.0437	1.4769	1.6298	22.638	4.395	6.4726		1.0307	2.6331	1.7934	1.8332	1.3065	2.8875	1.9166	14.317		514.87	46.662	117.27	39.497	78.08	75.386	224.31	63.99		1.0019	13.019	3.2948	17.999
288.692	4.1626	0.12052	5.9364	3.1784	2.1381	1.4502	4.586	14.015		3.3597	51.45	1.8757	2.924	1.8792	2.4205	1.6612	3.5006		8.1035	7.8833	1.9759	1.4787	1.6313	22.7	4.4412	6.2918		1.0107	2.5342	1.826	1.8241	1.2889	2.8106	1.9109	14.285		495.51	51.247	110.72	38.694	79.394	74.312	216.95	64.875		1.0043	12.804	3.4418	18.085
289.212	4.213	0.12204	5.8333	3.1095	2.2378	1.4512	4.682	13.701		3.3593	48.711	2.0088	2.8535	1.9422	2.4924	1.8289	3.3187		8.1297	7.4996	1.9054	1.4793	1.6287	22.749	4.4952	6.118		0.98928	2.4299	1.8576	1.8218	1.2737	2.7382	1.9005	14.25		475.12	56.161	104.5	37.875	80.271	73.089	208.47	66.309		1.0053	12.761	3.5915	18.122
289.731	4.2517	0.12357	5.8022	3.0726	2.3441	1.453	4.7985	13.349		3.3519	45.907	2.1586	2.7821	2.0034	2.5548	2.0142	3.1431		8.1835	7.1333	1.8336	1.4783	1.622	22.767	4.555	5.9519		0.96678	2.3215	1.8869	1.8255	1.261	2.671	1.8851	14.214		453.81	61.339	98.686	37.04	80.697	71.714	199.03	68.226		1.0052	12.911	3.741	18.103
290.25	4.2787	0.12508	5.8451	3.0691	2.4536	1.4554	4.9355	12.965		3.3378	43.079	2.3214	2.7102	2.0611	2.6071	2.2162	2.9756		8.2685	6.7899	1.7618	1.4754	1.6116	22.738	4.6189	5.7937		0.94373	2.2102	1.9126	1.8345	1.2505	2.6092	1.8647	14.179		431.72	66.715	93.337	36.191	80.667	70.197	188.77	70.553		1.0043	13.271	3.8868	18.026
290.769	4.294	0.12656	5.9626	3.0999	2.563	1.4583	5.0926	12.557		3.3175	40.265	2.4937	2.6381	2.1135	2.6488	2.4337	2.8182		8.3872	6.4753	1.6914	1.4703	1.598	22.649	4.6848	5.6437		0.92065	2.0971	1.9335	1.8475	1.2422	2.5533	1.8394	14.148		408.97	72.223	88.506	35.325	80.18	68.552	177.87	73.214		1.0032	13.858	4.0252	17.889
291.288	4.298	0.12798	6.1535	3.165	2.6688	1.4617	5.269	12.133		3.2913	37.503	2.6719	2.5664	2.159	2.6798	2.6649	2.6721		8.5411	6.1949	1.6241	1.4627	1.5817	22.489	4.7509	5.5017		0.89811	1.9837	1.9488	1.8635	1.2359	2.5035	1.8094	14.121		385.7	77.797	84.227	34.443	79.245	66.806	166.51	76.127		1.0023	14.683	4.1525	17.693
291.808	4.2914	0.12933	6.4146	3.2637	2.7678	1.4655	5.4636	11.701		3.2596	34.827	2.8528	2.4957	2.1958	2.6995	2.908	2.5383		8.7307	5.9543	1.561	1.4527	1.5633	22.25	4.8152	5.3675		0.87667	1.8709	1.9578	1.8811	1.2315	2.46	1.7751	14.098		362.05	83.373	80.518	33.543	77.876	64.991	154.86	79.213		1.0022	15.757	4.2647	17.439
292.327	4.275	0.13061	6.7411	3.3949	2.8568	1.4696	5.6746	11.267		3.2231	32.267	3.033	2.4265	2.2226	2.7079	3.1605	2.4177		8.9551	5.7588	1.5035	1.4401	1.5435	21.925	4.8758	5.2405		0.8569	1.7601	1.96	1.8991	1.2287	2.4233	1.7371	14.08		338.17	88.891	77.385	32.623	76.093	63.148	143.1	82.393		1.0035	17.084	4.358	17.133
292.846	4.2498	0.13181	7.1264	3.5566	2.9331	1.474	5.9	10.84		3.182	29.853	3.2095	2.3595	2.2382	2.7047	3.4199	2.3103		9.2124	5.6132	1.4528	1.4251	1.523	21.512	4.9312	5.1202		0.83933	1.6522	1.9551	1.9161	1.2274	2.3933	1.6963	14.065		314.22	94.292	74.819	31.681	73.922	61.325	131.39	85.593		1.0069	18.667	4.4287	16.779
293.365	4.217	0.13292	7.5626	3.7463	2.9942	1.4786	6.1373	10.427		3.1369	27.606	3.3796	2.2951	2.2414	2.69	3.6832	2.2161		9.4992	5.5219	1.4099	1.408	1.5024	21.012	4.9798	5.006		0.82445	1.5483	1.9432	1.931	1.2273	2.3705	1.6535	14.052		290.34	99.524	72.802	30.716	71.393	59.575	119.9	88.744		1.013	20.505	4.4731	16.384
293.885	4.1781	0.13395	8.04	3.961	3.0383	1.4833	6.3835	10.033		3.0883	25.547	3.5407	2.2339	2.2316	2.6636	3.9475	2.1348		9.8113	5.4888	1.3755	1.389	1.4824	20.427	5.0202	4.8972		0.8127	1.4493	1.9245	1.9426	1.2282	2.3551	1.6097	14.04		266.7	104.54	71.304	29.726	68.543	57.956	108.78	91.786		1.0223	22.593	4.4881	15.957
294.404	4.1345	0.1349	8.5479	4.1974	3.0637	1.488	6.6351	9.6662		3.0366	23.691	3.6905	2.1763	2.2084	2.6256	4.2097	2.0656		10.143	5.5172	1.3504	1.3686	1.4635	19.763	5.0513	4.793		0.80447	1.356	1.8994	1.9501	1.2297	2.3474	1.566	14.024		243.46	109.29	70.289	28.711	65.41	56.53	98.155	94.666		1.0354	24.92	4.4707	15.506
294.923	4.0878	0.13578	9.0745	4.4514	3.0696	1.4928	6.8887	9.3308		2.9823	22.052	3.8271	2.1226	2.1716	2.5764	4.4666	2.0076		10.489	5.6092	1.3349	1.3472	1.4465	19.026	5.0722	4.6928		0.80006	1.2692	1.8684	1.9527	1.2316	2.3478	1.5237	14.003		220.78	113.74	69.713	27.67	62.037	55.358	88.147	97.341		1.0528	27.474	4.4188	15.039
295.442	4.04	0.13658	9.6073	4.719	3.0556	1.4975	7.14	9.0316		2.9261	20.637	3.9486	2.0732	2.1214	2.5162	4.715	1.9597		10.842	5.7664	1.3291	1.3253	1.4316	18.226	5.0822	4.596		0.79966	1.1893	1.8324	1.95	1.2335	2.3567	1.4839	13.973		198.81	117.86	69.53	26.604	58.468	54.503	78.852	99.776		1.0749	30.24	4.3308	14.566
295.962	3.9927	0.13733	10.134	4.996	3.022	1.5021	7.3852	8.7724		2.8684	19.453	4.0538	2.0281	2.0583	2.4457	4.9521	1.9207		11.194	5.9889	1.3331	1.3036	1.4194	17.371	5.081	4.5022		0.8034	1.1167	1.7921	1.9416	1.2351	2.3745	1.4478	13.932		177.7	121.63	69.69	25.513	54.75	54.027	70.347	101.95		1.1019	33.196	4.2057	14.093
296.481	3.948	0.13802	10.641	5.278	2.9696	1.5065	7.6198	8.5562		2.8099	18.501	4.1416	1.9875	1.9831	2.3656	5.1748	1.8895		11.538	6.2759	1.3466	1.2826	1.4101	16.474	5.0684	4.4111		0.8113	1.0519	1.7484	1.9276	1.2362	2.4016	1.4165	13.877		157.6	125.01	70.143	24.399	50.929	53.988	62.687	103.84		1.1341	36.321	4.0439	13.629
297	3.9079	0.13867	11.115	5.5607	2.8998	1.5106	7.8399	8.3846		2.7511	17.782	4.2111	1.9513	1.8969	2.2767	5.3807	1.8646		11.867	6.6254	1.369	1.2628	1.4041	15.545	5.0446	4.3225		0.82328	0.99496	1.7024	1.9081	1.2365	2.4386	1.3909	13.805		138.64	128	70.843	23.266	47.053	54.439	55.908	105.44		1.1717	39.59	3.8466	13.18
297.519	3.8744	0.13928	11.546	5.8398	2.8144	1.5144	8.0412	8.2588		2.6927	17.296	4.2619	1.9193	1.8009	2.1804	5.5673	1.8449		12.172	7.034	1.3995	1.2447	1.4016	14.595	5.01	4.2363		0.83916	0.94591	1.6549	1.8836	1.2358	2.4857	1.3721	13.715		120.94	130.59	71.743	22.116	43.167	55.428	50.024	106.74		1.2147	42.974	3.6163	12.752
298.038	3.8494	0.13987	11.923	6.1114	2.7156	1.5179	8.2202	8.1784		2.6352	17.037	4.2938	1.8914	1.6968	2.0781	5.7326	1.8293		12.449	7.4969	1.4373	1.229	1.4026	13.637	4.9653	4.1527		0.85866	0.90472	1.607	1.8548	1.234	2.5434	1.3607	13.607		104.6	132.77	72.805	20.955	39.317	56.993	45.032	107.75		1.263	46.444	3.357	12.35
298.558	3.835	0.14044	12.235	6.372	2.6061	1.5209	8.3735	8.1423		2.5794	17.002	4.3067	1.8673	1.5864	1.9712	5.8748	1.8167		12.689	8.0084	1.4812	1.2159	1.4073	12.68	4.9116	4.0721		0.8814	0.8712	1.5594	1.8224	1.2311	2.6116	1.3572	13.479		89.712	134.54	73.993	19.786	35.545	59.166	40.909	108.47		1.3167	49.969	3.0739	11.975
299.077	3.8328	0.14099	12.475	6.6184	2.4886	1.5235	8.4981	8.1483		2.5258	17.186	4.3008	1.8466	1.4715	1.8618	5.9925	1.8063		12.89	8.5611	1.5298	1.2058	1.4159	11.736	4.85	3.9949		0.90694	0.84511	1.5132	1.7874	1.2272	2.6906	1.3621	13.334		76.353	135.91	75.28	18.617	31.89	61.967	37.619	108.91		1.3754	53.516	2.7741	11.632
299.596	3.8445	0.14153	12.636	6.8478	2.366	1.5258	8.5919	8.1932		2.4752	17.58	4.2766	1.8291	1.3543	1.7518	6.0847	1.7974		13.046	9.1469	1.5819	1.1991	1.4282	10.812	4.7821	3.9218		0.93475	0.82609	1.4689	1.7508	1.2224	2.7801	1.3756	13.173		64.571	136.88	76.646	17.454	28.39	65.405	35.111	109.08		1.4391	57.05	2.4661	11.319
300.115	3.8716	0.14207	12.715	7.0581	2.2414	1.5276	8.6532	8.273		2.4282	18.178	4.2348	1.8142	1.2369	1.6432	6.1508	1.7894		13.155	9.7564	1.636	1.1958	1.4444	9.9183	4.7094	3.8535		0.96425	0.81374	1.4272	1.7138	1.217	2.8798	1.3975	12.998		54.401	137.47	78.079	16.304	25.077	69.479	33.324	108.98		1.5076	60.537	2.1603	11.038
300.635	3.9151	0.14259	12.71	7.2478	2.1177	1.529	8.6809	8.3826		2.3855	18.971	4.1761	1.8017	1.1218	1.5385	6.1904	1.7819		13.217	10.379	1.6904	1.1961	1.4643	9.0604	4.634	3.7907		0.99482	0.80757	1.3887	1.6775	1.2115	2.9891	1.4278	12.815		45.853	137.68	79.576	15.173	21.98	74.175	32.187	108.64		1.5806	63.941	1.8683	10.787
301.154	3.976	0.1431	12.621	7.4159	1.9976	1.5301	8.6747	8.5165		2.3476	19.948	4.1014	1.7911	1.0114	1.4397	6.2036	1.7746		13.231	11.005	1.7437	1.1999	1.4879	8.2438	4.5577	3.7343		1.0258	0.80707	1.3538	1.6429	1.2062	3.1074	1.4659	12.627		38.922	137.53	81.139	14.071	19.122	79.468	31.624	108.07		1.6579	67.224	1.6037	10.564
301.673	4.0547	0.14359	12.45	7.562	1.8837	1.5309	8.6351	8.6682		2.3151	21.1	4.012	1.782	0.90789	1.3493	6.1909	1.7676		13.2	11.622	1.7944	1.2071	1.5151	7.4725	4.4828	3.6852		1.0565	0.81165	1.3227	1.611	1.2019	3.2335	1.5115	12.44		33.581	137.04	82.778	13.005	16.524	85.322	31.557	107.27		1.7393	70.351	1.3812	10.367
302.192	4.1515	0.14405	12.202	7.6865	1.7783	1.5316	8.563	8.831		2.2885	22.412	3.9092	1.7741	0.81388	1.2694	6.1531	1.7606		13.125	12.22	1.8409	1.2175	1.5457	6.7492	4.4113	3.644		1.0864	0.82074	1.2958	1.5827	1.1992	3.3663	1.5638	12.258		29.786	136.23	84.511	11.983	14.201	91.69	31.905	106.28		1.8246	73.285	1.2168	10.192
302.712	4.2662	0.14449	11.883	7.79	1.6833	1.5323	8.4601	8.9976		2.2682	23.871	3.7943	1.7671	0.73175	1.2021	6.0911	1.754		13.013	12.786	1.882	1.2308	1.5796	6.0752	4.3454	3.6115		1.1147	0.83371	1.273	1.5587	1.1987	3.5044	1.622	12.088		27.473	135.11	86.359	11.012	12.165	98.516	32.59	105.11		1.9137	75.99	1.1273	10.036
303.231	4.3984	0.14488	11.501	7.874	1.6004	1.533	8.3284	9.1605		2.2545	25.461	3.669	1.7606	0.66385	1.1492	6.0065	1.7478		12.866	13.31	1.9165	1.2467	1.6164	5.4506	4.287	3.5882		1.1409	0.84993	1.2544	1.5397	1.2013	3.6462	1.6853	11.934		26.567	133.71	88.344	10.101	10.42	105.74	33.536	103.77		2.0064	78.431	1.1301	9.8951
303.75	4.5471	0.14522	11.065	7.9404	1.5307	1.5339	8.1706	9.3124		2.2477	27.163	3.535	1.7543	0.61249	1.1125	5.9008	1.7423		12.693	13.782	1.9433	1.2647	1.656	4.8747	4.2379	3.5746		1.1644	0.86876	1.24	1.5259	1.2077	3.79	1.7526	11.8		26.975	132.04	90.494	9.2559	8.9717	113.28	34.672	102.31		2.1026	80.576	1.243	9.7658
304.269	4.7112	0.1455	10.587	7.9913	1.475	1.5351	7.9895	9.4457		2.2479	28.958	3.394	1.7478	0.57985	1.0932	5.776	1.7379		12.498	14.191	1.9617	1.2843	1.6979	4.3458	4.1998	3.5709		1.1848	0.88958	1.2296	1.5176	1.2185	3.934	1.8232	11.692		28.594	130.12	92.834	8.4835	7.8174	121.07	35.935	100.73		2.2022	82.394	1.4834	9.6441
304.788	4.8893	0.1457	10.076	8.0294	1.4338	1.5366	7.7884	9.5536		2.2551	30.823	3.2479	1.741	0.56797	1.0925	5.634	1.7349		12.29	14.531	1.9711	1.3051	1.7418	3.8619	4.1739	3.5772		1.2016	0.91176	1.2231	1.5148	1.2345	4.0763	1.8959	11.612		31.31	127.96	95.387	7.7895	6.9532	129.02	37.267	99.06		2.3051	83.86	1.8681	9.5264
305.308	5.0795	0.14583	9.5452	8.0572	1.407	1.5387	7.5707	9.6295		2.2691	32.734	3.0987	1.7335	0.57872	1.111	5.4773	1.7335		12.074	14.795	1.971	1.3264	1.7874	3.4205	4.1611	3.5934		1.2145	0.93469	1.2201	1.5173	1.2563	4.2148	1.9697	11.562		35.003	125.59	98.174	7.1789	6.3712	137.05	38.62	97.336		2.4112	84.952	2.4126	9.4091
305.827	5.2798	0.14588	9.0055	8.0776	1.3943	1.5414	7.3399	9.6676		2.2899	34.665	2.9482	1.725	0.61375	1.1489	5.3082	1.7343		11.857	14.976	1.9615	1.3479	1.8343	3.019	4.1621	3.6193		1.2233	0.95779	1.2204	1.5246	1.2845	4.3475	2.0437	11.544		39.543	123.03	101.21	6.6556	6.0609	145.08	39.951	95.582		2.5205	85.655	3.1312	9.2892
306.346	5.4877	0.14584	8.4688	8.0932	1.3949	1.5447	7.0995	9.6628		2.317	36.59	2.7982	1.7155	0.67445	1.2062	5.1292	1.7376		11.646	15.073	1.9426	1.3688	1.8821	2.6551	4.177	3.6543		1.2278	0.98052	1.2237	1.5363	1.3194	4.4726	2.1169	11.556		44.799	120.28	104.5	6.2225	6.0088	153.02	41.23	93.824		2.6328	85.959	4.0356	9.1638
306.865	5.7008	0.14571	7.9458	8.1066	1.408	1.5487	6.8533	9.6112		2.3501	38.479	2.6507	1.7047	0.7619	1.2823	4.9428	1.7438		11.445	15.082	1.9148	1.3887	1.9306	2.3268	4.2056	3.6979		1.228	1.0024	1.2297	1.5517	1.3613	4.588	2.1884	11.599		50.636	117.36	108.04	5.8815	6.1991	160.78	42.431	92.088		2.7479	85.863	5.1353	9.0308
307.385	5.9162	0.14549	7.4468	8.1198	1.4321	1.5533	6.605	9.5101		2.3888	40.304	2.5074	1.6925	0.87685	1.3762	4.7518	1.7532		11.26	15.005	1.8788	1.407	1.9794	2.0326	4.2475	3.7493		1.2239	1.0228	1.2381	1.57	1.4105	4.6919	2.2573	11.668		56.919	114.29	111.83	5.6333	6.6139	168.28	43.538	90.398		2.8657	85.372	6.4363	8.8881
307.904	6.1311	0.1452	6.9809	8.1346	1.4659	1.5586	6.3581	9.3577		2.4323	42.036	2.3697	1.6788	1.0196	1.4865	4.5588	1.7661		11.094	14.844	1.8354	1.4232	2.0283	1.7718	4.3016	3.8075		1.2155	1.0416	1.2485	1.5903	1.4669	4.7827	2.3227	11.761		63.516	111.08	115.84	5.4773	7.2331	175.45	44.542	88.774		2.9857	84.5	7.9417	8.7343
308.423	6.3425	0.14484	6.5562	8.1521	1.5077	1.5645	6.1164	9.1537		2.4802	43.645	2.2393	1.6638	1.1901	1.6116	4.3663	1.7829		10.949	14.602	1.7856	1.4368	2.0772	1.5447	4.3668	3.8717		1.2031	1.0582	1.2606	1.6117	1.5303	4.8587	2.384	11.873		70.297	107.74	120.05	5.4121	8.0351	182.19	45.438	87.234		3.1075	83.268	9.6504	8.5684
308.942	6.5474	0.14441	6.1794	8.1729	1.5557	1.5708	5.8834	8.899		2.5315	45.105	2.1175	1.6474	1.3876	1.7493	4.177	1.8038		10.828	14.286	1.7307	1.4473	2.1258	1.3524	4.4414	3.9407		1.187	1.0725	1.2742	1.6332	1.6005	4.9185	2.4404	12		77.136	104.29	124.41	5.4347	8.9968	188.44	46.23	85.793		3.2305	81.704	11.557	8.3901
309.462	6.7426	0.14394	5.8557	8.1972	1.6082	1.5776	5.6626	8.5958		2.5856	46.388	2.0053	1.63	1.611	1.8973	3.9932	1.829		10.729	13.903	1.6721	1.4543	2.1742	1.1972	4.5238	4.0133		1.1673	1.0842	1.2889	1.654	1.6768	4.9608	2.4914	12.136		83.918	100.73	128.88	5.5413	10.094	194.13	46.921	84.463		3.3539	79.843	13.653	8.199
309.981	6.9254	0.14344	5.5894	8.2242	1.6632	1.5847	5.4575	8.2471		2.6416	47.473	1.9038	1.6119	1.8587	2.053	3.8175	1.8587		10.652	13.462	1.6112	1.4575	2.2222	1.0825	4.6118	4.0885		1.1445	1.0933	1.3044	1.6729	1.7588	4.9848	2.5365	12.275		90.531	97.083	133.4	5.727	11.301	199.19	47.521	83.249		3.4768	77.724	15.924	7.9956
310.5	7.0931	0.14292	5.3829	8.2529	1.7191	1.5919	5.2713	7.8575		2.6985	48.339	1.8137	1.5934	2.1283	2.2134	3.6519	1.8929		10.596	12.972	1.5494	1.4565	2.2698	1.0128	4.7033	4.1649		1.1189	1.0996	1.3205	1.6893	1.8454	4.9895	2.5752	12.413		96.878	93.36	137.9	5.986	12.592	203.57	48.041	82.154		3.5981	75.391	18.353	7.7803
311.019	7.243	0.14241	5.2376	8.2813	1.7741	1.5991	5.1069	7.432		2.7553	48.969	1.7357	1.5751	2.4169	2.3758	3.4988	1.9315		10.557	12.446	1.4883	1.4511	2.3171	0.99358	4.7962	4.2414		1.0912	1.1033	1.3369	1.7024	1.9358	4.9746	2.6072	12.543		102.87	89.574	142.32	6.3115	13.942	207.2	48.494	81.176		3.7165	72.892	20.916	7.5542
311.538	7.3729	0.14192	5.1536	8.3074	1.8267	1.6062	4.9671	6.9767		2.8112	49.351	1.6701	1.5576	2.7213	2.5371	3.3601	1.9746		10.531	11.895	1.4294	1.4411	2.3639	1.0313	4.8882	4.3167		1.0616	1.1045	1.3535	1.7115	2.0288	4.9399	2.6322	12.663		108.42	85.736	146.59	6.6959	15.323	210.05	48.89	80.31		3.8305	70.273	23.589	7.3183
312.058	7.4809	0.14147	5.13	8.3285	1.8754	1.6129	4.8542	6.4983		2.865	49.476	1.617	1.5418	3.0373	2.6943	3.2376	2.0217		10.515	11.331	1.3742	1.4264	2.4101	1.1334	4.9772	4.3894		1.0308	1.1032	1.3701	1.716	2.1232	4.8855	2.6502	12.768		113.48	81.862	150.63	7.1312	16.71	212.08	49.241	79.545		3.9387	67.582	26.34	7.0737
312.577	7.5653	0.14107	5.1648	8.3417	1.9191	1.6192	4.7698	6.0039		2.9158	49.342	1.5765	1.5284	3.3607	2.8446	3.1329	2.0727		10.505	10.767	1.3238	1.4069	2.4557	1.3078	5.061	4.4584		0.9993	1.0998	1.3864	1.7157	2.2178	4.812	2.6612	12.855		117.97	77.964	154.36	7.6084	18.078	213.26	49.556	78.869		4.0395	64.864	29.138	6.822
313.096	7.625	0.14074	5.2551	8.3441	1.9567	1.625	4.7154	5.5011		2.9627	48.951	1.5482	1.5184	3.6865	2.9851	3.0474	2.127		10.494	10.214	1.2795	1.3828	2.5005	1.5629	5.1379	4.5224		0.96757	1.0945	1.4023	1.7101	2.3112	4.7201	2.665	12.924		121.87	74.058	157.72	8.1182	19.402	213.57	49.843	78.265		4.1312	62.162	31.947	6.5643
313.615	7.659	0.14048	5.3974	8.3326	1.9877	1.63	4.6913	4.9978		3.0047	48.308	1.5318	1.513	4.0098	3.1134	2.9825	2.1842		10.478	9.6833	1.2423	1.3542	2.544	1.9075	5.2061	4.58		0.93613	1.0877	1.4177	1.6992	2.4022	4.6112	2.662	12.973		125.15	70.158	160.64	8.6511	20.66	213.02	50.106	77.716		4.2121	59.515	34.729	6.3022
314.135	7.6669	0.14031	5.5876	8.3044	2.0116	1.6343	4.6976	4.5019		3.041	47.425	1.5265	1.5132	4.3251	3.2271	2.9391	2.2436		10.453	9.1865	1.2129	1.3215	2.5861	2.3501	5.2642	4.6301		0.90547	1.0795	1.4325	1.6831	2.4893	4.4866	2.6523	13.004		127.78	66.279	163.04	9.1971	21.832	211.61	50.346	77.202		4.2808	56.955	37.445	6.037
314.654	7.6484	0.14021	5.8213	8.2571	2.0282	1.6377	4.7332	4.0216		3.0708	46.318	1.5316	1.5204	4.6272	3.3242	2.9178	2.3047		10.414	8.7328	1.192	1.2849	2.6261	2.8993	5.311	4.6714		0.87604	1.0704	1.4465	1.6619	2.5716	4.3482	2.6362	13.018		129.75	62.435	164.88	9.7462	22.897	209.38	50.562	76.703		4.3359	54.51	40.056	5.7702
315.173	7.604	0.14019	6.0934	8.1887	2.0375	1.6402	4.7967	3.5647		3.0935	45.007	1.5462	1.5359	4.9106	3.4031	2.9191	2.3667		10.358	8.3304	1.1799	1.245	2.6636	3.5626	5.3457	4.7027		0.84826	1.0607	1.4596	1.6359	2.6477	4.1979	2.6142	13.018		131.08	58.642	166.1	10.288	23.84	206.37	50.746	76.198		4.376	52.202	42.524	5.503
315.692	7.5343	0.14025	6.3992	8.098	2.0401	1.6417	4.8857	3.139		3.1086	43.516	1.5693	1.5611	5.1703	3.4626	2.9432	2.4289		10.28	7.9863	1.1765	1.2024	2.6978	4.3471	5.3676	4.723		0.82249	1.0506	1.4717	1.6056	2.7169	4.0378	2.5865	13.006		131.77	54.915	166.66	10.814	24.647	202.63	50.89	75.668		4.4003	50.046	44.81	5.2368
316.212	7.4403	0.14036	6.7333	7.9842	2.0365	1.6424	4.9972	2.7519		3.1157	41.871	1.5997	1.5974	5.4015	3.5018	2.9897	2.4906		10.18	7.7058	1.1819	1.1576	2.7282	5.2584	5.3766	4.7313		0.79901	1.0404	1.4827	1.5715	2.7783	3.8702	2.5538	12.986		131.84	51.266	166.51	11.314	25.306	198.25	50.981	75.094		4.408	48.051	46.878	4.973
316.731	7.3236	0.14052	7.0907	7.8476	2.0274	1.6421	5.1274	2.4105		3.1145	40.102	1.6363	1.6462	5.5999	3.5203	3.0582	2.5511		10.054	7.4927	1.1955	1.1115	2.7539	6.3004	5.3726	4.7267		0.77808	1.0302	1.4925	1.5344	2.8313	3.6974	2.5165	12.961		131.33	47.71	165.63	11.778	25.81	193.3	51.005	74.459		4.3988	46.22	48.696	4.713
317.25	7.1862	0.1407	7.4663	7.6893	2.014	1.641	5.2721	2.1214		3.1051	38.238	1.678	1.709	5.7619	3.5181	3.1476	2.6098		9.9029	7.3491	1.2167	1.0649	2.7742	7.4757	5.356	4.7085		0.75986	1.0204	1.501	1.4949	2.8754	3.5216	2.4751	12.936		130.27	44.259	163.99	12.2	26.153	187.9	50.943	73.748		4.3725	44.554	50.235	4.4582
317.769	7.0304	0.14089	7.8551	7.5109	1.9973	1.6391	5.4267	1.8905		3.0874	36.312	1.7238	1.7871	5.8847	3.4956	3.2567	2.6661		9.7258	7.2757	1.2446	1.0186	2.7883	8.7842	5.3273	4.6763		0.74444	1.0108	1.5081	1.454	2.9104	3.3449	2.4303	12.912		128.7	40.925	161.58	12.571	26.332	182.16	50.778	72.95		4.3295	43.047	51.468	4.21
318.288	6.8592	0.14107	8.2523	7.3152	1.9787	1.6366	5.5863	1.7231		3.0616	34.355	1.7726	1.8818	5.9662	3.4538	3.3838	2.7194		9.5237	7.2714	1.2784	0.97359	2.7955	10.224	5.2875	4.6298		0.73185	1.0017	1.5139	1.4124	2.9362	3.1695	2.3825	12.894		126.67	37.717	158.4	12.886	26.35	176.19	50.488	72.054		4.2701	41.689	52.375	3.9701
318.808	6.6759	0.1412	8.653	7.1056	1.9595	1.6336	5.7456	1.6239		3.0281	32.398	1.8235	1.9942	6.0054	3.3938	3.5269	2.7694		9.298	7.3339	1.3167	0.93082	2.795	11.79	5.2376	4.569		0.72206	0.99298	1.5181	1.3712	2.9528	2.9974	2.3323	12.882		124.23	34.646	154.47	13.139	26.208	170.11	50.056	71.055		4.1954	40.472	52.941	3.7398
319.327	6.4842	0.14128	9.0527	6.8862	1.9411	1.6301	5.8996	1.5965		2.9873	30.469	1.8758	2.1251	6.0024	3.3175	3.6837	2.8158		9.051	7.4593	1.3584	0.89128	2.7864	13.474	5.1788	4.4941		0.71496	0.98464	1.5208	1.3312	2.9604	2.8303	2.2802	12.879		121.42	31.717	149.8	13.327	25.914	164.04	49.461	69.949		4.1062	39.382	53.156	3.5208
319.846	6.2882	0.14128	9.4472	6.6616	1.9249	1.6265	6.0432	1.6439		2.9399	28.595	1.9287	2.2752	5.9579	3.2268	3.8515	2.8584		8.7853	7.6427	1.4022	0.85595	2.7691	15.266	5.1127	4.4056		0.71037	0.97659	1.522	1.2934	2.9592	2.6698	2.2268	12.885		118.31	28.939	144.42	13.447	25.475	158.1	48.688	68.738		4.0039	38.409	53.019	3.3147
320.365	6.0922	0.14118	9.8323	6.437	1.9124	1.6228	6.1718	1.7681		2.8864	26.801	1.982	2.4448	5.874	3.1241	4.0276	2.8972		8.5038	7.8783	1.4467	0.82583	2.7429	17.152	5.0409	4.3044		0.7081	0.96875	1.5216	1.2586	2.9498	2.5175	2.1725	12.9		114.93	26.316	138.39	13.499	24.904	152.39	47.723	67.423		3.8901	37.539	52.53	3.1227
320.885	5.9007	0.14097	10.204	6.2179	1.9048	1.6191	6.281	1.9701		2.8278	25.107	2.0351	2.6337	5.7536	3.0121	4.2088	2.9323		8.21	8.1591	1.4907	0.80186	2.7076	19.115	4.9649	4.1917		0.70788	0.96097	1.5198	1.2276	2.9326	2.3744	2.1178	12.923		111.35	23.851	131.75	13.482	24.212	147.02	46.554	66.014		3.7663	36.763	51.701	2.9464
321.404	5.7184	0.14062	10.559	6.01	1.9034	1.6158	6.367	2.2497		2.7647	23.529	2.0879	2.8413	5.6004	2.8937	4.3921	2.9638		7.9073	8.4779	1.5329	0.78496	2.6632	21.137	4.8863	4.0687		0.70943	0.95314	1.5167	1.2011	2.908	2.2416	2.0631	12.953		107.62	21.547	124.58	13.4	23.414	142.05	45.176	64.52		3.6342	36.072	50.544	2.7869
321.923	5.5496	0.14012	10.894	5.819	1.9093	1.6128	6.4268	2.606		2.6982	22.081	2.1403	3.0668	5.419	2.772	4.5744	2.9922		7.5993	8.8269	1.5723	0.77597	2.6101	23.194	4.807	3.9373		0.71245	0.9451	1.5123	1.1797	2.8767	2.1199	2.0088	12.987		103.77	19.405	116.96	13.254	22.526	137.56	43.587	62.956		3.4956	35.458	49.08	2.6451
322.442	5.3986	0.13947	11.205	5.6505	1.9233	1.6104	6.4578	3.0367		2.629	20.772	2.1923	3.3085	5.2144	2.6501	4.7526	3.0178		7.2897	9.198	1.6079	0.77568	2.5487	25.264	4.7284	3.7994		0.71661	0.93674	1.5071	1.1639	2.8391	2.0098	1.9554	13.022		99.865	17.426	108.96	13.05	21.564	133.58	41.793	61.34		3.3523	34.917	47.334	2.522
322.962	5.2692	0.13865	11.491	5.5099	1.9463	1.6086	6.4585	3.5389		2.5581	19.606	2.2439	3.5644	4.9925	2.5312	4.9239	3.041		6.9819	9.5832	1.6389	0.78476	2.4797	27.318	4.652	3.6573		0.7216	0.92794	1.5011	1.154	2.7959	1.9118	1.9031	13.058		95.933	15.607	100.7	12.794	20.546	130.14	39.805	59.692		3.206	34.446	45.335	2.418
323.481	5.1648	0.13767	11.748	5.4021	1.9788	1.6077	6.4278	4.1082		2.4862	18.585	2.2952	3.832	4.7592	2.4185	5.0856	3.0625		6.6792	9.9742	1.6647	0.80375	2.4039	29.332	4.5791	3.5133		0.72712	0.91861	1.4948	1.1503	2.7476	1.8258	1.8523	13.089		92.013	13.947	92.267	12.491	19.489	127.24	37.64	58.036		3.0585	34.043	43.116	2.3333
324	5.088	0.13653	11.977	5.3315	2.0212	1.6077	6.3658	4.7394		2.4142	17.707	2.3462	4.1082	4.521	2.315	5.2356	3.0826		6.3847	10.363	1.6848	0.83308	2.3224	31.276	4.5111	3.37		0.73287	0.90869	1.4884	1.1527	2.6948	1.752	1.8033	13.114		88.137	12.443	83.768	12.148	18.41	124.85	35.324	56.398		2.9114	33.709	40.71	2.2681
324.519	5.0406	0.13522	12.174	5.3017	2.0735	1.6087	6.273	5.4264		2.3429	16.966	2.3968	4.3897	4.284	2.2236	5.3721	3.1018		6.1014	10.743	1.6991	0.873	2.2364	33.125	4.4491	3.2301		0.73859	0.89813	1.4824	1.1614	2.6379	1.69	1.7563	13.13		84.334	11.089	75.311	11.773	17.325	122.95	32.888	54.804		2.766	33.446	38.156	2.2219
325.038	5.0237	0.13376	12.341	5.3153	2.1357	1.6107	6.1509	6.1622		2.2728	16.353	2.447	4.6726	4.0546	2.1468	5.4937	3.1207		5.8318	11.106	1.7076	0.92362	2.1471	34.851	4.3939	3.0961		0.74404	0.88692	1.4771	1.176	2.5774	1.6396	1.7117	13.136		80.624	9.8811	67.002	11.375	16.252	121.46	30.373	53.285		2.6238	33.255	35.49	2.1943
325.558	5.0374	0.13216	12.478	5.3744	2.2074	1.6138	6.0015	6.9389		2.2045	15.858	2.4967	4.9531	3.8389	2.0867	5.5997	3.1397		5.5782	11.446	1.7105	0.98483	2.0561	36.431	4.3465	2.9708		0.74901	0.8751	1.4729	1.1963	2.5139	1.6	1.6695	13.129		77.027	8.8121	58.944	10.959	15.205	120.33	27.822	51.868		2.4859	33.14	32.751	2.1842
326.077	5.0808	0.13043	12.585	5.4795	2.2882	1.618	5.8275	7.748		2.1384	15.469	2.5454	5.2268	3.6425	2.0454	5.6899	3.1592		5.3427	11.757	1.7082	1.0563	1.9646	37.842	4.3076	2.8565		0.75332	0.8627	1.4701	1.2219	2.4477	1.5707	1.6301	13.11		73.556	7.8746	51.237	10.535	14.197	119.47	25.287	50.583		2.3532	33.104	29.976	2.1907
326.596	5.1522	0.12858	12.663	5.6302	2.3773	1.6232	5.6321	8.5805		2.0749	15.172	2.5927	5.4897	3.4706	2.024	5.7648	3.1794		5.1269	12.034	1.7013	1.1376	1.8741	39.065	4.2777	2.7557		0.75683	0.84982	1.4691	1.2523	2.3795	1.5509	1.5936	13.077		70.22	7.0605	43.972	10.108	13.243	118.78	22.825	49.457		2.2267	33.149	27.202	2.2124
327.115	5.2487	0.12665	12.716	5.8252	2.4738	1.6294	5.419	9.4269		2.0143	14.953	2.6382	5.7376	3.3274	2.0235	5.8254	3.2007		4.9323	12.273	1.6905	1.228	1.7861	40.087	4.2575	2.6702		0.75943	0.83654	1.4701	1.2868	2.3097	1.5397	1.56	13.033		67.023	6.3607	37.233	9.6855	12.352	118.18	20.496	48.516		2.1069	33.278	24.462	2.2476
327.635	5.367	0.12464	12.744	6.0616	2.5767	1.6365	5.1923	10.278		1.9568	14.798	2.6811	5.9666	3.2168	2.0444	5.8731	3.2234		4.7597	12.47	1.6767	1.3265	1.7017	40.895	4.2474	2.6018		0.76103	0.82301	1.4734	1.3248	2.2388	1.5361	1.5295	12.978		63.969	5.7656	31.093	9.2729	11.535	117.57	18.365	47.785		1.9943	33.494	21.788	2.2946
328.154	5.5028	0.12259	12.752	6.3356	2.6848	1.6444	4.9563	11.123		1.9024	14.695	2.7206	6.1732	3.1415	2.0864	5.91	3.2476		4.61	12.625	1.661	1.4319	1.6223	41.483	4.2477	2.5519		0.7616	0.80935	1.4791	1.3655	2.1673	1.5392	1.502	12.915		61.054	5.265	25.613	8.8748	10.799	116.85	16.497	47.284		1.8893	33.797	19.209	2.3514
328.673	5.6512	0.12051	12.742	6.6425	2.7966	1.653	4.7155	11.953		1.8513	14.629	2.7558	6.3543	3.1034	2.1492	5.9385	3.2737		4.4836	12.735	1.6443	1.5431	1.549	41.847	4.259	2.5215		0.76112	0.79571	1.4873	1.4083	2.0958	1.548	1.4775	12.846		58.277	4.8485	20.842	8.495	10.151	115.94	14.958	47.032		1.7919	34.19	16.75	2.4159
329.192	5.8069	0.11843	12.717	6.9763	2.9109	1.6622	4.4746	12.759		1.8035	14.592	2.786	6.5074	3.1034	2.2314	5.9612	3.3018		4.3803	12.8	1.6278	1.6583	1.4825	41.99	4.2813	2.5112		0.7596	0.78226	1.498	1.4523	2.0248	1.5615	1.4559	12.774		55.631	4.5052	16.818	8.1362	9.5967	114.76	13.817	47.044		1.7022	34.673	14.433	2.486
329.712	5.9645	0.11637	12.68	7.3303	3.0261	1.6717	4.238	13.531		1.7592	14.572	2.8102	6.6305	3.1413	2.3318	5.9812	3.3323		4.2999	12.823	1.6126	1.7761	1.4238	41.917	4.3148	2.5212		0.7571	0.76912	1.5112	1.4968	1.9549	1.5786	1.4372	12.702		53.11	4.2247	13.562	7.8	9.1384	113.25	13.137	47.332		1.6203	35.247	12.275	2.5595
330.231	6.1184	0.11435	12.634	7.697	3.1408	1.6814	4.0103	14.263		1.7183	14.564	2.8274	6.7224	3.216	2.4483	6.0012	3.3653		4.2417	12.805	1.5998	1.8945	1.3733	41.637	4.3596	2.5514		0.7537	0.75644	1.5266	1.5412	1.8868	1.5985	1.4212	12.632		50.707	3.9962	11.082	7.4872	8.7781	111.36	12.979	47.906		1.546	35.913	10.291	2.6339
330.75	6.2631	0.11241	12.581	8.0687	3.2535	1.6911	3.7958	14.945		1.6811	14.561	2.8368	6.7826	3.3254	2.5786	6.0242	3.4013		4.2046	12.75	1.5903	2.0116	1.3316	41.162	4.4158	2.601		0.7495	0.74433	1.5443	1.5848	1.821	1.6203	1.4077	12.568		48.415	3.8097	9.3755	7.1978	8.5163	109.05	13.401	48.774		1.4792	36.671	8.4917	2.7073
331.269	6.3935	0.11055	12.523	8.4369	3.3627	1.7006	3.5985	15.573		1.6477	14.561	2.8377	6.8111	3.4666	2.7202	6.0529	3.4405		4.1872	12.66	1.585	2.1256	1.2988	40.507	4.4832	2.6692		0.74464	0.73287	1.5638	1.6269	1.7581	1.643	1.3965	12.511		46.227	3.6554	8.4238	6.9309	8.3518	106.31	14.452	49.943		1.4198	37.525	6.8829	2.7773
331.788	6.5051	0.10881	12.461	8.7934	3.4672	1.7097	3.4219	16.141		1.6184	14.563	2.8295	6.8087	3.6357	2.8703	6.0897	3.4832		4.1879	12.54	1.5847	2.2344	1.275	39.692	4.5616	2.7548		0.73931	0.72211	1.5849	1.6671	1.6985	1.666	1.3875	12.461		44.137	3.5243	8.1972	6.6849	8.2821	103.15	16.177	51.418		1.3677	38.475	5.468	2.8421
332.308	6.5938	0.10719	12.398	9.1297	3.5656	1.7182	3.2695	16.645		1.5935	14.566	2.8117	6.7769	3.8282	3.0259	6.1364	3.5297		4.2049	12.395	1.5899	2.3362	1.2602	38.735	4.6508	2.856		0.73369	0.71208	1.6072	1.7052	1.6428	1.6884	1.3804	12.421		42.141	3.4081	8.6545	6.4582	8.3035	99.572	18.607	53.204		1.3228	39.526	4.2465	2.8998
332.827	6.6564	0.1057	12.333	9.438	3.6568	1.726	3.1437	17.083		1.5734	14.573	2.784	6.7174	4.039	3.1839	6.1946	3.5803		4.236	12.229	1.601	2.4293	1.2542	37.657	4.7504	2.9712		0.72802	0.70277	1.6303	1.7407	1.5914	1.7096	1.3752	12.389		40.234	3.2995	9.7443	6.2483	8.4109	95.625	21.768	55.308		1.285	40.683	3.2151	2.9488
333.346	6.6908	0.10437	12.267	9.7107	3.74	1.7329	3.0469	17.452		1.5585	14.588	2.7465	6.6328	4.2623	3.3412	6.2652	3.635		4.2792	12.046	1.6181	2.5119	1.2566	36.481	4.8599	3.0982		0.72254	0.69413	1.6537	1.7735	1.5446	1.729	1.3716	12.364		38.416	3.1921	11.406	6.0532	8.5981	91.357	25.67	57.737		1.2543	41.95	2.3673	2.9877
333.865	6.6956	0.1032	12.199	9.9413	3.8145	1.7388	2.9806	17.753		1.5495	14.616	2.6993	6.5256	4.4922	3.4946	6.3481	3.6941		4.3322	11.851	1.641	2.5827	1.267	35.23	4.9788	3.2348		0.71751	0.6861	1.6771	1.8037	1.5028	1.7459	1.3695	12.344		36.685	3.0805	13.572	5.8706	8.8577	86.832	30.312	60.499		1.2307	43.335	1.6945	3.0157
334.385	6.6705	0.1022	12.13	10.124	3.8796	1.7436	2.9457	17.985		1.5467	14.663	2.643	6.3988	4.7226	3.6413	6.4431	3.7575		4.3929	11.649	1.6695	2.6406	1.2848	33.925	5.1062	3.3789		0.71321	0.67859	1.6998	1.8313	1.4659	1.76	1.3687	12.325		35.043	2.9604	16.169	5.6985	9.1813	82.123	35.681	63.603		1.2142	44.844	1.186	3.0321
334.904	6.6161	0.10137	12.059	10.254	3.9352	1.7472	2.9425	18.152		1.5508	14.734	2.5783	6.2556	4.9473	3.7783	6.5489	3.8252		4.4596	11.442	1.7031	2.6847	1.3096	32.589	5.2412	3.528		0.70992	0.67153	1.7214	1.8564	1.4342	1.7706	1.3692	12.306		33.492	2.8287	19.117	5.5352	9.5595	77.314	41.75	67.058		1.2048	46.487	0.82938	3.0366
335.423	6.534	0.10071	11.987	10.328	3.981	1.7497	2.9706	18.254		1.5622	14.836	2.5061	6.0992	5.1601	3.903	6.6637	3.8967		4.5303	11.236	1.7409	2.7145	1.3406	31.242	5.3827	3.6797		0.70789	0.66481	1.7414	1.8792	1.4075	1.7773	1.3708	12.28		32.036	2.6832	22.336	5.3794	9.9822	72.488	48.476	70.876		1.2025	48.27	0.61091	3.0294
335.942	6.4267	0.10023	11.912	10.345	4.0171	1.7509	3.0291	18.297		1.5813	14.976	2.4278	5.9327	5.3553	4.0131	6.7851	3.9718		4.6039	11.033	1.782	2.73	1.3772	29.906	5.5292	3.8319		0.70737	0.65838	1.7594	1.9001	1.3857	1.7797	1.3735	12.246		30.68	2.5228	25.744	5.2305	10.438	67.735	55.804	75.065		1.2073	50.203	0.51609	3.0108
336.462	6.2973	0.099923	11.835	10.303	4.0438	1.751	3.1164	18.284		1.6086	15.157	2.3446	5.7594	5.5274	4.1066	6.9102	4.0499		4.6794	10.838	1.8254	2.7313	1.4186	28.599	5.679	3.9821		0.70858	0.6522	1.7749	1.9194	1.3685	1.7773	1.3773	12.197		29.428	2.3474	29.26	5.0882	10.917	63.139	63.666	79.632		1.2192	52.292	0.52986	2.9819
336.981	6.1496	0.099789	11.756	10.202	4.0612	1.75	3.2305	18.22		1.6442	15.384	2.2584	5.5823	5.6716	4.1819	7.0356	4.1302		4.7563	10.653	1.8698	2.7191	1.4642	27.337	5.8301	4.1284		0.7117	0.64625	1.7877	1.9372	1.3554	1.7697	1.382	12.131		28.286	2.1581	32.806	4.9528	11.406	58.783	71.981	84.582		1.238	54.545	0.63699	2.9437
337.5	5.9879	0.099825	11.674	10.046	4.0699	1.7481	3.3688	18.11		1.6882	15.66	2.1708	5.4045	5.7836	4.2379	7.1578	4.2121		4.8347	10.483	1.914	2.6943	1.5131	26.137	5.9802	4.2687		0.71683	0.64061	1.7974	1.9539	1.346	1.7565	1.3876	12.044		27.26	1.9565	36.306	4.8252	11.893	54.741	80.656	89.913		1.2636	56.967	0.82237	2.8977
338.019	5.8166	0.10003	11.59	9.8378	4.0702	1.7453	3.5283	17.958		1.7406	15.985	2.0837	5.2286	5.8599	4.2737	7.2728	4.2944		4.9151	10.329	1.9567	2.6583	1.5648	25.01	6.1268	4.4013		0.72405	0.63536	1.8039	1.9698	1.3396	1.7372	1.3942	11.935		26.355	1.7455	39.692	4.7067	12.368	51.079	89.589	95.622		1.2959	59.56	1.0713	2.8457
338.538	5.6405	0.1004	11.505	9.5811	4.0626	1.7419	3.7057	17.772		1.801	16.359	1.9992	5.0574	5.8982	4.289	7.3768	4.3762		4.9986	10.197	1.9966	2.6126	1.6183	23.969	6.267	4.5246		0.73335	0.63069	1.807	1.9849	1.3355	1.7114	1.4018	11.8		25.574	1.5284	42.902	4.599	12.82	47.851	98.67	101.69		1.3345	62.326	1.3696	2.7894
339.058	5.4642	0.10093	11.417	9.2819	4.0477	1.7379	3.8974	17.555		1.8689	16.779	1.9193	4.8933	5.8966	4.284	7.4661	4.4562		5.0868	10.089	2.0324	2.5589	1.673	23.023	6.3979	4.6372		0.74464	0.62681	1.8068	1.9995	1.3329	1.679	1.4103	11.641		24.921	1.3093	45.882	4.5043	13.238	45.101	107.78	108.11		1.3791	65.263	1.7041	2.7309
339.577	5.2923	0.10162	11.328	8.9465	4.0258	1.7337	4.0996	17.314		1.9437	17.24	1.8459	4.7385	5.8544	4.2593	7.537	4.5334		5.1815	10.01	2.063	2.4991	1.7281	22.178	6.5164	4.738		0.7578	0.62403	1.8033	2.0137	1.3311	1.6396	1.4198	11.457		24.396	1.0932	48.586	4.4248	13.614	42.858	116.8	114.84		1.4295	68.362	2.0622	2.672
340.096	5.1288	0.10247	11.237	8.582	3.9977	1.7293	4.3084	17.053		2.0244	17.737	1.781	4.5951	5.772	4.2159	7.5862	4.6065		5.2848	9.9636	2.0875	2.4354	1.7828	21.44	6.6196	4.8262		0.77259	0.6227	1.7967	2.0274	1.3292	1.593	1.4303	11.253		24.001	0.88531	50.979	4.3631	13.939	41.139	125.61	121.84		1.4853	71.615	2.4326	2.6149
340.615	4.9778	0.10347	11.145	8.1957	3.9637	1.7251	4.5196	16.776		2.11	18.262	1.7264	4.4647	5.6503	4.1551	7.6109	4.6741		5.399	9.9531	2.1049	2.3698	1.8365	20.813	6.7045	4.9011		0.78875	0.62322	1.7872	2.0407	1.3265	1.5393	1.4417	11.03		23.732	0.69148	53.034	4.3217	14.209	39.948	134.08	129.07		1.546	75.003	2.8052	2.5614
341.135	4.8423	0.10463	11.053	7.7955	3.9244	1.721	4.7295	16.488		2.199	18.804	1.6839	4.3489	5.4916	4.0787	7.6087	4.7352		5.5263	9.9825	2.1148	2.3042	1.8883	20.298	6.7684	4.9625		0.80594	0.62603	1.7751	2.0535	1.3222	1.4786	1.454	10.794		23.585	0.51789	54.736	4.3031	14.419	39.273	142.09	136.47		1.6113	78.508	3.1708	2.5133
341.654	4.7251	0.10595	10.96	7.3892	3.8805	1.7174	4.934	16.193		2.29	19.355	1.6549	4.249	5.2985	3.9886	7.5776	4.7884		5.6687	10.056	2.1166	2.2405	1.9377	19.896	6.8091	5.0103		0.8238	0.63163	1.7609	2.0655	1.3157	1.4112	1.4671	10.551		23.555	0.37103	56.078	4.3096	14.568	39.093	149.54	143.98		1.6808	82.1	3.5215	2.4721
342.173	4.6282	0.10742	10.865	6.9847	3.8325	1.7143	5.1296	15.892		2.3814	19.904	1.6406	4.1657	5.0745	3.887	7.5165	4.8326		5.828	10.175	2.1102	2.1806	1.9839	19.606	6.8248	5.0446		0.84192	0.64052	1.7449	2.0767	1.3063	1.3375	1.481	10.309		23.633	0.25754	57.061	4.3433	14.655	39.374	156.3	151.51		1.7541	85.749	3.8506	2.4391
342.692	4.553	0.10905	10.77	6.5892	3.7812	1.7119	5.3126	15.588		2.4715	20.441	1.6421	4.0998	4.8236	3.7762	7.4248	4.8669		6.0052	10.344	2.0956	2.1259	2.0263	19.425	6.8144	5.0659		0.85991	0.65321	1.7276	2.0868	1.2937	1.2584	1.4956	10.073		23.809	0.18413	57.697	4.406	14.682	40.076	162.29	158.99		1.8309	89.417	4.1526	2.4155
343.212	4.5	0.11083	10.674	6.2098	3.7273	1.7101	5.4802	15.283		2.5585	20.954	1.6602	4.0513	4.5503	3.6584	7.3025	4.8902		6.2009	10.565	2.0732	2.0778	2.0643	19.348	6.7771	5.075		0.87734	0.67022	1.7096	2.0956	1.2777	1.1747	1.5106	9.8526		24.07	0.15747	58.005	4.4992	14.653	41.148	167.42	166.33		1.9106	93.061	4.423	2.4021
343.731	4.4691	0.11275	10.577	5.8527	3.6717	1.7091	5.6295	14.978		2.6407	21.435	1.6952	4.0202	4.2594	3.5361	7.1502	4.9018		6.4148	10.838	2.0433	2.0372	2.0975	19.371	6.7134	5.0725		0.89383	0.69205	1.6913	2.1029	1.2579	1.0877	1.526	9.6548		24.402	0.18404	58.008	4.6238	14.573	42.535	171.61	173.44		1.9931	96.635	4.6582	2.3995
344.25	4.4594	0.11481	10.478	5.5235	3.6152	1.7089	5.7584	14.674		2.7164	21.875	1.7473	4.0061	3.9558	3.4114	6.9692	4.9012		6.6458	11.165	2.0068	2.005	2.1253	19.487	6.6241	5.0597		0.90904	0.7192	1.6735	2.1083	1.2344	0.99904	1.5414	9.487		24.791	0.27002	57.739	4.7802	14.45	44.179	174.81	180.22		2.078	100.09	4.8559	2.4077
344.769	4.4694	0.117	10.376	5.2266	3.5587	1.7093	5.8654	14.369		2.7841	22.269	1.8162	4.0079	3.6443	3.2864	6.7615	4.8878		6.8919	11.543	1.9644	1.9816	2.1475	19.687	6.511	5.0378		0.92264	0.75214	1.6565	2.1118	1.2072	0.91036	1.5568	9.3559		25.219	0.42116	57.23	4.9685	14.291	46.019	176.96	186.59		2.1649	103.38	5.0144	2.4267
345.288	4.497	0.11931	10.272	4.9655	3.503	1.7104	5.9492	14.065		2.8423	22.612	1.9016	4.0246	3.3297	3.163	6.5292	4.8616		7.1502	11.973	1.9172	1.967	2.1636	19.963	6.3765	5.008		0.9344	0.79127	1.6411	2.113	1.1768	0.82376	1.5718	9.2671		25.671	0.64264	56.518	5.1881	14.104	47.998	178.04	192.47		2.2535	106.44	5.1328	2.4562
345.808	4.5395	0.12171	10.164	4.7427	3.449	1.712	6.0093	13.761		2.8899	22.901	2.0026	4.0545	3.0167	3.0428	6.2751	4.8226		7.4171	12.451	1.8663	1.9613	2.1737	20.305	6.2238	4.9719		0.94415	0.83701	1.6278	2.1118	1.1433	0.74157	1.5862	9.225		26.129	0.9389	55.64	5.4378	13.9	50.059	178.04	197.77		2.3434	109.24	5.2111	2.4954
346.327	4.5938	0.1242	10.051	4.5594	3.3975	1.714	6.046	13.455		2.9259	23.138	2.1181	4.0959	2.7095	2.9272	6.0024	4.7712		7.6879	12.974	1.8128	1.9639	2.1774	20.703	6.0564	4.9311		0.95176	0.88967	1.617	2.1081	1.1072	0.66631	1.5998	9.2327		26.577	1.3136	54.634	5.716	13.687	52.151	176.96	202.44		2.4343	111.71	5.2499	2.5433
346.846	4.6564	0.12673	9.9344	4.4157	3.3491	1.7162	6.0597	13.148		2.9496	23.325	2.2467	4.1466	2.412	2.8173	5.7144	4.7079		7.9574	13.537	1.758	1.9743	2.1749	21.145	5.8785	4.8871		0.95721	0.94956	1.6094	2.1019	1.0691	0.60075	1.6121	9.2918		26.999	1.7693	53.533	6.0204	13.474	54.226	174.82	206.41		2.5257	113.82	5.2502	2.5986
347.365	4.7237	0.1293	9.8124	4.3109	3.3043	1.7185	6.0517	12.838		2.9605	23.469	2.387	4.2043	2.1276	2.714	5.4146	4.6336		8.2199	14.135	1.7029	1.9914	2.1663	21.618	5.6946	4.8416		0.96054	1.0169	1.6052	2.093	1.0297	0.5478	1.6231	9.4021		27.38	2.3076	52.371	6.3481	13.269	56.245	171.66	209.65		2.6171	115.52	5.2136	2.6599
347.885	4.7921	0.13187	9.6852	4.243	3.2636	1.7207	6.0235	12.525		2.9585	23.578	2.537	4.2664	1.8593	2.6177	5.1066	4.5494		8.4692	14.762	1.6488	2.0143	2.1518	22.11	5.5093	4.7962		0.96185	1.0919	1.6049	2.0816	0.98945	0.51046	1.6325	9.5621		27.706	2.9288	51.173	6.6958	13.079	58.177	167.55	212.14		2.708	116.78	5.1421	2.7254
348.404	4.8578	0.1344	9.5529	4.2093	3.2271	1.7226	5.9771	12.209		2.9437	23.666	2.6951	4.3304	1.6094	2.5288	4.7941	4.4568		8.6989	15.411	1.5967	2.0417	2.1317	22.608	5.3272	4.7528		0.9613	1.1746	1.6088	2.0678	0.94923	0.49182	1.64	9.7688		27.966	3.6321	49.964	7.0597	12.91	59.994	162.54	213.88		2.7977	117.57	5.0379	2.7932
348.923	4.9174	0.13687	9.4161	4.2062	3.1948	1.724	5.9149	11.889		2.9167	23.745	2.859	4.3934	1.3799	2.4473	4.4805	4.3574		8.9027	16.076	1.5475	2.0722	2.1063	23.099	5.1529	4.713		0.9591	1.265	1.617	2.0516	0.90971	0.49497	1.6455	10.018		28.149	4.4151	48.76	7.4354	12.767	61.68	156.72	214.88		2.8855	117.85	4.9036	2.8611
349.442	4.9678	0.13924	9.2755	4.2295	3.1665	1.7249	5.8394	11.567		2.8783	23.833	3.0267	4.4529	1.1722	2.373	4.1692	4.2528		9.0742	16.748	1.5021	2.1042	2.0762	23.57	4.9908	4.6785		0.95552	1.3632	1.6295	2.0334	0.87163	0.5229	1.649	10.303		28.249	5.2743	47.575	7.8182	12.652	63.223	150.2	215.19		2.9705	117.62	4.7422	2.9271
349.962	5.0061	0.14148	9.1323	4.2747	3.1417	1.725	5.7532	11.243		2.8294	23.949	3.1963	4.5064	0.98706	2.3056	3.8634	4.1452		9.2077	17.421	1.4609	2.1363	2.0418	24.006	4.8449	4.651		0.95083	1.4689	1.6464	2.0135	0.83571	0.57848	1.6504	10.619		28.259	6.2045	46.415	8.2031	12.567	64.618	143.08	214.85		3.0519	116.86	4.5567	2.989
350.481	5.0302	0.14355	8.988	4.3368	3.1197	1.7243	5.6591	10.917		2.7716	24.113	3.3655	4.5513	0.82505	2.2446	3.566	4.0364		9.2977	18.087	1.4246	2.1669	2.0037	24.397	4.7187	4.6323		0.94531	1.5819	1.6675	1.9923	0.80267	0.66438	1.6497	10.958		28.177	7.1996	45.283	8.5849	12.51	65.866	135.47	213.93		3.1286	115.57	4.3504	3.0446
351	5.0383	0.14543	8.8443	4.4106	3.0998	1.7226	5.56	10.591		2.7063	24.347	3.5325	4.5857	0.68609	2.1893	3.2796	3.9288		9.3399	18.739	1.3932	2.1946	1.9625	24.729	4.6151	4.6238		0.93928	1.7019	1.6927	1.9702	0.77314	0.78296	1.647	11.313		28.002	8.2518	44.178	8.9579	12.48	66.971	127.5	212.5		3.1996	113.76	4.1268	3.0919
351.519	5.0294	0.1471	8.7032	4.4909	3.0809	1.72	5.4585	10.268		2.6353	24.671	3.6956	4.6076	0.56979	2.1389	3.0065	3.8242		9.3303	19.369	1.3671	2.2178	1.9187	24.993	4.5366	4.6271		0.93301	1.8285	1.7215	1.948	0.74775	0.93624	1.6425	11.677		27.735	9.3524	43.095	9.3166	12.473	67.942	119.29	210.64		3.2637	111.44	3.8895	3.1291
352.038	5.0029	0.14852	8.5669	4.5727	3.0619	1.7163	5.3573	9.9473		2.5607	25.108	3.8531	4.6157	0.47539	2.0927	2.7487	3.7249		9.2663	19.971	1.3459	2.2353	1.8729	25.181	4.4845	4.6435		0.92675	1.961	1.7536	1.9261	0.72703	1.1258	1.6362	12.042		27.381	10.492	42.027	9.6555	12.484	68.79	110.98	208.44		3.3198	108.64	3.6423	3.1546
352.558	4.959	0.14968	8.4375	4.6511	3.0417	1.7115	5.259	9.6326		2.4844	25.677	4.0037	4.6088	0.40184	2.0498	2.5077	3.6328		9.1464	20.539	1.3295	2.2459	1.8258	25.284	4.4597	4.6742		0.92073	2.0988	1.7884	1.9052	0.71145	1.3528	1.6286	12.403		26.946	11.658	40.967	9.9693	12.506	69.528	102.67	205.98		3.3666	105.37	3.3894	3.1671
353.077	4.8983	0.15057	8.3171	4.7217	3.0192	1.7057	5.1657	9.3258		2.4087	26.397	4.1463	4.5863	0.34784	2.0093	2.2848	3.5498		8.9703	21.067	1.3175	2.2488	1.7778	25.299	4.462	4.7201		0.91512	2.2412	1.8254	1.8862	0.70139	1.6178	1.6197	12.752		26.439	12.842	39.905	10.253	12.532	70.169	94.494	203.35		3.4031	101.69	3.1347	3.1656
353.596	4.8221	0.15119	8.2076	4.7802	2.9932	1.6989	5.0797	9.0294		2.3356	27.282	4.28	4.5479	0.31188	1.9704	2.0807	3.4775		8.7389	21.551	1.3093	2.2432	1.7294	25.224	4.4908	4.782		0.91006	2.3871	1.864	1.8697	0.69713	1.9208	1.6098	13.086		25.872	14.03	38.834	10.501	12.555	70.726	86.561	200.63		3.4281	97.634	2.8826	3.1496
354.115	4.7321	0.15154	8.1108	4.8231	2.9628	1.6911	5.0027	8.7456		2.2671	28.345	4.4044	4.4938	0.29229	1.9324	1.8962	3.4174		8.4545	21.985	1.3044	2.2287	1.6813	25.057	4.5444	4.8602		0.90561	2.5357	1.9036	1.8565	0.69887	2.2611	1.5993	13.4		25.258	15.21	37.747	10.709	12.565	71.212	78.973	197.89		3.4407	93.247	2.6374	3.1188
354.635	4.6305	0.15162	8.0281	4.8472	2.9269	1.6824	4.9362	8.4772		2.2053	29.594	4.5191	4.4246	0.28732	1.8945	1.7314	3.3707		8.1208	22.366	1.3021	2.2052	1.6337	24.803	4.6205	4.9549		0.90183	2.6857	1.9435	1.8472	0.70671	2.6374	1.5884	13.69		24.611	16.37	36.64	10.874	12.556	71.638	71.819	195.19		3.4402	88.582	2.4035	3.0735
355.154	4.5198	0.15146	7.9609	4.85	2.8851	1.6729	4.8814	8.2267		2.1519	31.031	4.6241	4.3411	0.29515	1.8561	1.5864	3.3385		7.7425	22.691	1.3015	2.1729	1.5872	24.467	4.7162	5.0659		0.89868	2.8361	1.9829	1.8425	0.72062	3.0477	1.5772	13.956		23.949	17.499	35.51	10.991	12.52	72.013	65.179	192.59		3.4261	83.693	2.1854	3.0142
355.673	4.4028	0.15108	7.9098	4.8294	2.8367	1.6626	4.839	7.9968		2.1084	32.654	4.7195	4.2444	0.31393	1.8166	1.4608	3.3214		7.3257	22.96	1.302	2.1324	1.5422	24.057	4.8281	5.1927		0.89613	2.9854	2.0214	1.843	0.74052	3.4894	1.5661	14.195		23.289	18.585	34.358	11.059	12.451	72.344	59.117	190.12		3.3979	78.637	1.9876	2.9419
356.192	4.2825	0.1505	7.8755	4.7841	2.7815	1.6516	4.8093	7.7903		2.0762	34.456	4.8056	4.1361	0.34184	1.7756	1.3543	3.3198		6.8774	23.169	1.3027	2.0845	1.4989	23.585	4.9522	5.3344		0.89409	3.1325	2.0582	1.849	0.76619	3.9593	1.555	14.406		22.65	19.617	33.188	11.076	12.342	72.634	53.682	187.81		3.3559	73.47	1.8144	2.8578
356.712	4.1623	0.14976	7.8583	4.7131	2.7195	1.6401	4.7925	7.6098		2.0563	36.426	4.8829	4.0176	0.37711	1.7328	1.2663	3.3339		6.4055	23.319	1.303	2.0303	1.4578	23.064	5.0845	5.4899		0.89245	3.2759	2.0929	1.861	0.79736	4.4533	1.5443	14.591		22.05	20.586	32.005	11.04	12.19	72.885	48.909	185.69		3.3003	68.247	1.6701	2.7634
357.231	4.0453	0.14889	7.8581	4.6161	2.6508	1.6281	4.7879	7.4584		2.0495	38.546	4.952	3.8908	0.41804	1.688	1.1962	3.3638		5.9186	23.412	1.302	1.9713	1.4191	22.508	5.2205	5.6577		0.89111	3.4143	2.1249	1.8791	0.83366	4.9672	1.5339	14.748		21.507	21.484	30.817	10.951	11.992	73.093	44.819	183.74		3.2318	63.023	1.559	2.6606
357.75	3.9349	0.14793	7.8746	4.4936	2.576	1.6158	4.795	7.3389		2.0561	40.794	5.0134	3.7577	0.46305	1.6411	1.1433	3.4091		5.4259	23.447	1.2992	1.9094	1.3832	21.935	5.3559	5.836		0.88993	3.5461	2.1537	1.9034	0.87465	5.4958	1.5238	14.88		21.041	22.302	29.635	10.809	11.748	73.254	41.418	181.98		3.1513	57.85	1.4849	2.551
358.269	3.8345	0.14693	7.9074	4.3462	2.4954	1.6032	4.8126	7.2544		2.0761	43.145	5.068	3.6201	0.51065	1.5924	1.1068	3.4695		4.9366	23.428	1.2941	1.8465	1.3502	21.363	5.4863	6.0228		0.88881	3.6702	2.1791	1.9339	0.91986	6.0339	1.514	14.985		20.665	23.037	28.47	10.616	11.458	73.359	38.698	180.37		3.0602	52.776	1.4515	2.4368
358.788	3.7474	0.14593	7.9559	4.1755	2.41	1.5904	4.8393	7.2077		2.1093	45.57	5.1164	3.48	0.55949	1.5419	1.0863	3.5442		4.4603	23.357	1.2862	1.7846	1.3205	20.81	5.6077	6.2159		0.88763	3.7851	2.2008	1.9702	0.96874	6.5759	1.5045	15.066		20.397	23.684	27.337	10.374	11.123	73.397	36.639	178.89		2.9599	47.849	1.4623	2.3198
359.308	3.6764	0.14497	8.0194	3.9834	2.3204	1.5775	4.8737	7.2017		2.1552	48.036	5.1594	3.3394	0.60837	1.49	1.0811	3.6328		4.0062	23.238	1.2753	1.7262	1.2942	20.296	5.7161	6.4127		0.8863	3.8897	2.2186	2.0122	1.0207	7.1158	1.4951	15.123		20.247	24.24	26.247	10.085	10.749	73.357	35.21	177.51		2.8521	43.108	1.5201	2.2021
359.827	3.6246	0.1441	8.0972	3.7724	2.2278	1.5647	4.9141	7.2394		2.2127	50.509	5.1978	3.2002	0.65621	1.4372	1.0909	3.7343		3.5832	23.075	1.2613	1.6734	1.2713	19.838	5.8083	6.6106		0.88474	3.9829	2.2324	2.0592	1.0752	7.6479	1.4858	15.155		20.225	24.707	25.216	9.7539	10.339	73.224	34.368	176.18		2.7387	38.593	1.6275	2.0855
360.346	3.5942	0.14335	8.1883	3.5455	2.1331	1.552	4.9587	7.3232		2.2807	52.954	5.2323	3.0643	0.70208	1.3839	1.1153	3.848		3.1997	22.873	1.2441	1.6286	1.252	19.456	5.8812	6.8068		0.88291	4.0637	2.2422	2.1108	1.1316	8.1663	1.4764	15.163		20.338	25.086	24.256	9.3835	9.9009	72.983	34.065	174.86		2.6216	34.337	1.7865	1.9718
360.865	3.5875	0.14277	8.2922	3.3063	2.0374	1.5394	5.0059	7.4553		2.3579	55.334	5.2638	2.9332	0.74518	1.3307	1.1543	3.9731		2.8634	22.636	1.2239	1.5939	1.2362	19.164	5.9326	6.9987		0.88078	4.1313	2.248	2.1661	1.1893	8.6655	1.4668	15.147		20.591	25.38	23.379	8.9791	9.4403	72.62	34.244	173.5		2.5028	30.368	1.9985	1.8625
361.385	3.6061	0.14238	8.408	3.0587	1.9417	1.5273	5.0539	7.6376		2.4425	57.616	5.2928	2.8087	0.78485	1.2784	1.208	4.1088		2.581	22.369	1.201	1.5714	1.2238	18.979	5.9606	7.1832		0.87834	4.1852	2.2499	2.2244	1.2476	9.1401	1.4568	15.106		20.982	25.594	22.596	8.5456	8.9651	72.122	34.844	172.05		2.384	26.709	2.2641	1.7591
361.904	3.6511	0.14222	8.5351	2.8072	1.8471	1.5155	5.1012	7.8712		2.5328	59.762	5.3203	2.6919	0.82056	1.2278	1.2764	4.2541		2.3583	22.076	1.1758	1.5628	1.2146	18.911	5.9643	7.3578		0.87563	4.225	2.2482	2.2848	1.306	9.5854	1.4465	15.039		21.51	25.734	21.915	8.0886	8.4834	71.475	35.799	170.49		2.2671	23.38	2.5835	1.6627
362.423	3.7231	0.1423	8.6732	2.5565	1.7547	1.5043	5.1464	8.1566		2.6269	61.742	5.3468	2.5842	0.8519	1.1795	1.3601	4.4082		2.1998	21.761	1.1489	1.5696	1.2085	18.97	5.9433	7.5197		0.87268	4.2507	2.2429	2.3461	1.3639	9.9971	1.4358	14.947		22.167	25.81	21.343	7.6139	8.0033	70.671	37.044	168.77		2.1536	20.395	2.956	1.5742
362.942	3.8221	0.14265	8.8217	2.3117	1.6656	1.4938	5.1882	8.4934		2.7228	63.523	5.3731	2.4865	0.87857	1.1344	1.4593	4.57		2.1089	21.428	1.1207	1.593	1.2051	19.163	5.8978	7.6664		0.86957	4.2624	2.2343	2.4073	1.4206	10.372	1.4248	14.828		22.944	25.829	20.883	7.1274	7.5329	69.702	38.513	166.87		2.0451	17.763	3.3799	1.4944
363.462	3.9476	0.14326	8.9805	2.0783	1.5806	1.4841	5.2252	8.8802		2.8186	65.077	5.3997	2.3995	0.90038	1.0934	1.5747	4.7384		2.0875	21.079	1.0921	1.6337	1.204	19.494	5.8287	7.7958		0.86638	4.2603	2.2226	2.4673	1.4758	10.706	1.4135	14.683		23.828	25.803	20.536	6.6353	7.0802	68.565	40.142	164.77		1.9426	15.49	3.8531	1.4235
363.981	4.0982	0.14415	9.1494	1.8618	1.5009	1.4754	5.2566	9.3147		2.9122	66.382	5.4272	2.3238	0.91725	1.0573	1.7067	4.9123		2.1363	20.716	1.0637	1.692	1.205	19.963	5.7377	7.9058		0.8632	4.2452	2.208	2.5247	1.5287	10.999	1.4024	14.512		24.803	25.742	20.3	6.1437	6.6526	67.26	41.872	162.46		1.847	13.577	4.3724	1.3619
364.5	4.2722	0.1453	9.3284	1.668	1.4272	1.4677	5.2815	9.7931		3.0017	67.415	5.4561	2.2598	0.92917	1.0269	1.8558	5.0901		2.2546	20.341	1.0364	1.7679	1.2075	20.565	5.6267	7.9948		0.86014	4.2179	2.1907	2.5785	1.5791	11.247	1.3915	14.315		25.854	25.656	20.168	5.6583	6.2571	65.793	43.645	159.94		1.759	12.019	4.9338	1.3095
365.019	4.4674	0.1467	9.5176	1.5025	1.3605	1.4611	5.2992	10.311		3.0855	68.162	5.4866	2.2074	0.93625	1.003	2.0224	5.2703		2.4403	19.955	1.0107	1.8608	1.2112	21.295	5.4985	8.0615		0.85732	4.1792	2.171	2.6273	1.6263	11.451	1.3813	14.093		26.96	25.558	20.132	5.185	5.8999	64.174	45.41	157.23		1.679	10.811	5.5326	1.2661
365.538	4.6807	0.14832	9.717	1.3712	1.3014	1.4559	5.3092	10.861		3.1618	68.611	5.519	2.1667	0.93867	0.9863	2.2068	5.451		2.69	19.559	0.98751	1.9696	1.2158	22.143	5.356	8.1052		0.85487	4.1303	2.149	2.6702	1.6701	11.611	1.3722	13.849		28.101	25.458	20.181	4.7293	5.5867	62.418	47.121	154.35		1.607	9.9415	6.1633	1.2313
366.058	4.9088	0.15013	9.9263	1.2794	1.2506	1.452	5.3112	11.437		3.2291	68.757	5.5534	2.1375	0.93668	0.97751	2.409	5.6303		2.999	19.152	0.96735	2.0928	1.2208	23.096	5.2026	8.1254		0.8529	4.0725	2.1248	2.7058	1.71	11.726	1.3648	13.586		29.257	25.366	20.301	4.2962	5.3222	60.544	48.739	151.34		1.5429	9.3976	6.8198	1.2045
366.577	5.1478	0.1521	10.146	1.2324	1.2088	1.4496	5.3052	12.03		3.2862	68.599	5.5897	2.1193	0.93061	0.97718	2.6291	5.8059		3.3615	18.735	0.95082	2.2286	1.2259	24.138	5.0419	8.1222		0.85154	4.0069	2.0986	2.7334	1.7459	11.798	1.3594	13.307		30.407	25.293	20.477	3.8903	5.1103	58.578	50.231	148.23		1.4863	9.1628	7.495	1.185
367.096	5.3937	0.15419	10.374	1.2351	1.1763	1.4488	5.2914	12.631		3.3321	68.141	5.6275	2.1116	0.92086	0.98581	2.8665	5.9756		3.7707	18.307	0.93841	2.3746	1.231	25.253	4.8775	8.0961		0.85093	3.9349	2.0704	2.7519	1.7775	11.828	1.3567	13.016		31.533	25.248	20.69	3.5157	4.9539	56.548	51.569	145.07		1.4367	9.2182	8.1818	1.1721
367.615	5.642	0.15634	10.611	1.2918	1.1535	1.4496	5.2702	13.229		3.3657	67.393	5.6665	2.1139	0.90789	1.0038	3.1206	6.1368		4.2186	17.868	0.93049	2.5283	1.2358	26.422	4.7132	8.048		0.85118	3.8577	2.0404	2.7608	1.8047	11.817	1.3571	12.72		32.614	25.237	20.921	3.176	4.8551	54.49	52.733	141.93		1.3934	9.5427	8.8722	1.1649
368.135	5.8881	0.1585	10.856	1.4062	1.1406	1.452	5.2421	13.814		3.3865	66.369	5.7059	2.1256	0.8922	1.0313	3.3904	6.2871		4.6966	17.418	0.92732	2.6868	1.2402	27.623	4.5528	7.9793		0.85242	3.7765	2.0085	2.7593	1.8273	11.768	1.3612	12.423		33.636	25.266	21.151	2.8741	4.8152	52.441	53.707	138.85		1.3554	10.113	9.558	1.1624
368.654	6.1274	0.16064	11.107	1.5813	1.1378	1.4561	5.208	14.374		3.3939	65.089	5.745	2.1458	0.87434	1.0686	3.6746	6.4241		5.1956	16.956	0.92908	2.847	1.2442	28.835	4.3997	7.8917		0.85474	3.6923	1.9749	2.7472	1.8454	11.681	1.3694	12.131		34.582	25.342	21.361	2.6123	4.8342	50.442	54.481	135.91		1.322	10.905	10.231	1.1638
369.173	6.3552	0.16269	11.363	1.8192	1.1451	1.4618	5.169	14.898		3.3877	63.574	5.7827	2.1739	0.8549	1.1157	3.9713	6.5455		5.7058	16.484	0.93579	3.0059	1.2479	30.038	4.2574	7.7872		0.85824	3.6061	1.9395	2.7242	1.859	11.561	1.3821	11.852		35.441	25.466	21.531	2.392	4.9116	48.537	55.049	133.16		1.2921	11.891	10.883	1.1682
369.692	6.5673	0.1646	11.621	2.1213	1.1622	1.4692	5.1264	15.374		3.3679	61.85	5.818	2.2093	0.83447	1.1725	4.2785	6.649		6.2175	16	0.94739	3.1603	1.2514	31.21	4.1289	7.6681		0.86301	3.5186	1.9022	2.6903	1.8682	11.407	1.3996	11.59		36.201	25.64	21.645	2.2143	5.0459	46.769	55.41	130.66		1.2648	13.046	11.507	1.1746
370.212	6.7596	0.16634	11.878	2.4878	1.1891	1.4781	5.0813	15.792		3.3346	59.945	5.8495	2.2511	0.81365	1.2388	4.5938	6.7328		6.7207	15.506	0.96369	3.3072	1.255	32.331	4.0167	7.5369		0.8691	3.4304	1.8632	2.6457	1.8732	11.224	1.4221	11.352		36.856	25.864	21.685	2.0794	5.2347	45.184	55.566	128.46		1.2394	14.34	12.093	1.1822
370.731	6.9286	0.16785	12.134	2.9178	1.2254	1.4886	5.0353	16.142		3.288	57.888	5.8759	2.2987	0.79306	1.3144	4.9142	6.7952		7.2058	15.003	0.98441	3.4438	1.2589	33.38	3.9232	7.3963		0.87654	3.342	1.8224	2.5909	1.8742	11.012	1.4498	11.142		37.4	26.135	21.637	1.9867	5.4749	43.827	55.522	126.6		1.2149	15.746	12.636	1.1903
371.25	7.0714	0.1691	12.384	3.4095	1.2706	1.5004	4.9898	16.416		3.2287	55.709	5.896	2.3515	0.77327	1.3987	5.2365	6.835		7.6635	14.493	1.0092	3.5676	1.2637	34.341	3.8501	7.2488		0.88535	3.2536	1.7799	2.5264	1.8717	10.774	1.4827	10.966		37.828	26.451	21.489	1.9353	5.7628	42.739	55.285	125.1		1.1908	17.236	13.129	1.1982
371.769	7.1855	0.17006	12.626	3.9596	1.3243	1.5134	4.9463	16.605		3.1573	53.44	5.9084	2.409	0.75482	1.4913	5.5574	6.8515		8.0852	13.978	1.0375	3.6762	1.2697	35.196	3.7988	7.0974		0.89549	3.1655	1.7356	2.4529	1.8659	10.512	1.5205	10.826		38.141	26.806	21.232	1.9235	6.094	41.958	54.865	123.98		1.1666	18.78	13.567	1.2053
372.288	7.2695	0.1707	12.857	4.5639	1.3859	1.5275	4.906	16.706		3.0748	51.111	5.9117	2.4706	0.73825	1.5916	5.873	6.8443		8.4633	13.459	1.0689	3.7678	1.2775	35.932	3.7699	6.9446		0.90691	3.0775	1.6898	2.3716	1.8574	10.228	1.563	10.723		38.338	27.193	20.859	1.9491	6.4636	41.52	54.274	123.25		1.1419	20.351	13.946	1.2112
372.808	7.3227	0.17101	13.075	5.2171	1.4549	1.5425	4.8704	16.713		2.9819	48.751	5.9047	2.5358	0.72398	1.6987	6.1796	6.8135		8.7908	12.94	1.1028	3.8411	1.2876	36.535	3.764	6.7931		0.9195	2.9897	1.6425	2.2834	1.8466	9.9256	1.6098	10.66		38.42	27.605	20.367	2.0096	6.8664	41.451	53.523	122.87		1.1165	21.924	14.262	1.2157
373.327	7.345	0.17097	13.276	5.9124	1.5306	1.5583	4.8404	16.626		2.8799	46.387	5.8864	2.6043	0.71243	1.8119	6.4732	6.76		9.0623	12.423	1.1385	3.8951	1.3006	36.995	3.7808	6.6453		0.93314	2.9019	1.594	2.1896	1.8341	9.6057	1.6604	10.634		38.392	28.033	19.756	2.1021	7.2968	41.772	52.626	122.83		1.0904	23.471	14.515	1.2184
373.846	7.3375	0.17058	13.459	6.6424	1.6123	1.5746	4.8171	16.444		2.7701	44.047	5.8558	2.6758	0.70391	1.93	6.7501	6.6848		9.2735	11.912	1.1753	3.9293	1.3169	37.303	3.8198	6.5034		0.94766	2.814	1.5445	2.0917	1.8206	9.2709	1.714	10.643		38.255	28.467	19.026	2.2233	7.7491	42.495	51.597	123.08		1.0639	24.971	14.703	1.2193
374.365	7.3019	0.16985	13.621	7.3984	1.6993	1.5912	4.8012	16.17		2.6537	41.754	5.8123	2.7499	0.69866	2.0521	7.0065	6.5898		9.4214	11.409	1.2124	3.9437	1.3372	37.453	3.8801	6.3694		0.96285	2.7258	1.4943	1.991	1.8066	8.9234	1.7699	10.684		38.015	28.896	18.184	2.3697	8.2176	43.624	50.449	123.55		1.0371	26.402	14.827	1.2183
374.885	7.2407	0.16878	13.761	8.1711	1.791	1.6079	4.7933	15.81		2.5323	39.529	5.7553	2.8265	0.69685	2.1768	7.239	6.477		9.5047	10.918	1.2493	3.9386	1.3618	37.441	3.9605	6.2449		0.9785	2.6371	1.4438	1.889	1.793	8.5653	1.8272	10.752		37.677	29.31	17.238	2.5378	8.6966	45.151	49.197	124.19		1.0107	27.744	14.89	1.2156
375.404	7.157	0.16739	13.876	8.9502	1.8866	1.6245	4.7936	15.368		2.4072	37.389	5.6845	2.9055	0.69857	2.3029	7.4444	6.3492		9.5231	10.441	1.2851	3.9148	1.3912	37.263	4.0593	6.1312		0.99434	2.5478	1.3935	1.7873	1.7803	8.1986	1.8849	10.842		37.245	29.696	16.198	2.724	9.1807	47.06	47.856	124.92		0.98516	28.982	14.894	1.2113
375.923	7.0544	0.16569	13.965	9.7251	1.9855	1.6408	4.8024	14.854		2.2801	35.35	5.6001	2.9866	0.70382	2.4288	7.62	6.209		9.4781	9.9808	1.319	3.8734	1.4255	36.921	4.1746	6.0293		1.0101	2.4578	1.3438	1.6874	1.7693	7.8253	1.942	10.947		36.725	30.044	15.077	2.9248	9.6647	49.323	46.438	125.65		0.96125	30.1	14.843	1.2056
376.442	6.9371	0.16373	14.026	10.485	2.087	1.6567	4.8193	14.277		2.1523	33.423	5.5022	3.0698	0.7125	2.553	7.7637	6.0598		9.3721	9.5403	1.3505	3.8159	1.4651	36.415	4.3045	5.9397		1.0255	2.3673	1.2952	1.5908	1.7606	7.4473	1.9976	11.059		36.121	30.343	13.889	3.1368	10.144	51.901	44.959	126.3		0.93976	31.089	14.741	1.1986
376.962	6.8093	0.16151	14.06	11.218	2.1905	1.6718	4.8442	13.647		2.0254	31.618	5.3915	3.1549	0.72447	2.6739	7.8737	5.9047		9.2091	9.1208	1.3788	3.7439	1.5097	35.751	4.4467	5.8628		1.0403	2.2762	1.2483	1.4988	1.7547	7.0661	2.0505	11.174		35.438	30.58	12.652	3.3568	10.614	54.747	43.431	126.78		0.92154	31.941	14.593	1.1905
377.481	6.6756	0.15907	14.064	11.913	2.2953	1.6861	4.8763	12.975		1.9008	29.938	5.2688	3.2418	0.73948	2.7899	7.949	5.747		8.9936	8.7233	1.4034	3.6593	1.5592	34.936	4.5988	5.7984		1.0542	2.1849	1.2036	1.4127	1.7523	6.6834	2.0999	11.282		34.682	30.747	11.383	3.5816	11.07	57.804	41.871	127.03		0.90749	32.649	14.403	1.1816
378	6.5401	0.15645	14.04	12.56	2.4008	1.6994	4.9149	12.275		1.7798	28.387	5.1351	3.3304	0.75722	2.8994	7.989	5.59		8.7314	8.3485	1.4237	3.5641	1.6134	33.979	4.7584	5.7461		1.0669	2.0936	1.1617	1.3337	1.7537	6.3007	2.1448	11.38		33.858	30.834	10.103	3.8087	11.509	61.006	40.291	126.97		0.89851	33.212	14.176	1.1719
378.519	6.4071	0.15367	13.986	13.149	2.5064	1.7115	4.959	11.557		1.6634	26.964	4.9917	3.4204	0.77732	3.0007	7.994	5.4366		8.4286	7.9962	1.4393	3.4605	1.6715	32.891	4.9231	5.7052		1.0781	2.003	1.1232	1.2626	1.7592	5.9194	2.1844	11.46		32.973	30.832	8.8325	4.0355	11.929	64.282	38.705	126.53		0.89544	33.629	13.917	1.1617
379.038	6.2802	0.15076	13.904	13.669	2.6114	1.7223	5.0077	10.834		1.5529	25.665	4.8401	3.5115	0.79935	3.0925	7.9646	5.2896		8.0917	7.666	1.4498	3.3506	1.7329	31.688	5.0903	5.6749		1.0875	1.9135	1.0888	1.2002	1.7692	5.541	2.2181	11.518		32.033	30.735	7.5928	4.2598	12.325	67.557	37.129	125.66		0.89913	33.904	13.629	1.151
379.558	6.1629	0.14776	13.795	14.114	2.7153	1.7317	5.0596	10.118		1.4491	24.486	4.6819	3.6033	0.82282	3.1734	7.9023	5.1513		7.7277	7.3568	1.4551	3.2368	1.7966	30.386	5.2575	5.6541		1.095	1.8261	1.0588	1.147	1.7837	5.167	2.2452	11.552		31.048	30.536	6.4067	4.48	12.697	70.75	35.575	124.31		0.91031	34.042	13.318	1.1398
380.077	6.0579	0.14469	13.661	14.475	2.8176	1.7396	5.1137	9.4201		1.3528	23.419	4.5189	3.6956	0.84722	3.242	7.8089	5.0236		7.3433	7.0674	1.455	3.1212	1.8615	29.005	5.4224	5.6415		1.1004	1.7413	1.0339	1.1034	1.8026	4.7989	2.2653	11.56		30.027	30.233	5.2973	4.6945	13.041	73.784	34.058	122.47		0.92961	34.051	12.986	1.1282
380.596	5.9673	0.14159	13.503	14.748	2.9178	1.746	5.1687	8.75		1.2648	22.454	4.3528	3.7876	0.87199	3.2975	7.6867	4.9079		6.9452	6.796	1.4495	3.006	1.9263	27.565	5.5826	5.636		1.1034	1.6602	1.0146	1.0694	1.8258	4.4383	2.278	11.542		28.981	29.821	4.2878	4.9021	13.357	76.58	32.592	120.12		0.95755	33.94	12.635	1.1162
381.115	5.8924	0.13848	13.325	14.929	3.0153	1.7507	5.2235	8.1175		1.1854	21.584	4.1854	3.8788	0.89657	3.339	7.5387	4.8049		6.5397	6.5414	1.4388	2.8932	1.9898	26.09	5.7359	5.6362		1.1041	1.5836	1.0011	1.0449	1.8532	4.0868	2.283	11.498		27.925	29.301	3.4016	5.1021	13.643	79.067	31.189	117.25		0.99447	33.721	12.268	1.1038
381.635	5.8342	0.13538	13.131	15.017	3.1098	1.7538	5.2769	7.5308		1.1151	20.797	4.0185	3.9684	0.92038	3.366	7.3678	4.7151		6.1327	6.3019	1.4231	2.7849	2.0504	24.601	5.8802	5.6406		1.1022	1.5123	0.99392	1.0296	1.8842	3.7461	2.2802	11.431		26.872	28.673	2.662	5.294	13.899	81.177	29.86	113.87		1.0406	33.407	11.887	1.0908
382.154	5.7927	0.13233	12.924	15.011	3.2008	1.7553	5.328	6.9969		1.0542	20.084	3.8537	4.0556	0.94286	3.3782	7.1775	4.6382		5.7297	6.0765	1.4028	2.6827	2.1068	23.124	6.0135	5.648		1.0979	1.4473	0.99323	1.0229	1.9186	3.4179	2.2695	11.345		25.838	27.941	2.0917	5.4774	14.125	82.854	28.616	109.99		1.0958	33.013	11.492	1.0772
382.673	5.7673	0.12933	12.71	14.914	3.2881	1.7551	5.3759	6.5215		1.0029	19.434	3.6926	4.1395	0.96349	3.3757	6.9713	4.5735		5.3354	5.8643	1.3785	2.5883	2.1576	21.683	6.134	5.6571		1.0912	1.3893	0.99917	1.0242	1.9557	3.104	2.251	11.246		24.842	27.109	1.7129	5.6525	14.321	84.05	27.465	105.66		1.16	32.553	11.085	1.0629
383.192	5.7568	0.12642	12.492	14.731	3.3714	1.7534	5.4199	6.1091		0.96115	18.841	3.5367	4.2191	0.98177	3.3588	6.7528	4.5201		4.9539	5.665	1.3507	2.5031	2.2013	20.3	6.2401	5.6666		1.0821	1.339	1.0118	1.0325	1.9952	2.8058	2.2248	11.138		23.902	26.183	1.5469	5.8194	14.487	84.73	26.414	100.91		1.2326	32.044	10.666	1.048
383.712	5.7595	0.1236	12.276	14.467	3.4504	1.7501	5.4596	5.7626		0.92901	18.295	3.3871	4.2936	0.99727	3.3281	6.5255	4.4764		4.5888	5.4788	1.3202	2.4283	2.2369	18.998	6.3303	5.6754		1.0709	1.2969	1.031	1.047	2.0363	2.5249	2.191	11.028		23.034	25.171	1.6136	5.9786	14.625	84.873	25.468	95.788		1.313	31.5	10.235	1.0322
384.231	5.7732	0.1209	12.067	14.132	3.525	1.7455	5.4945	5.4837		0.9064	17.79	3.245	4.3621	1.0096	3.2845	6.2928	4.441		4.2431	5.3062	1.2877	2.365	2.2634	17.797	6.4033	5.6824		1.0577	1.2634	1.0566	1.0666	2.0787	2.2626	2.1502	10.922		22.259	24.081	1.9317	6.1305	14.735	84.47	24.629	90.34		1.4003	30.937	9.7937	1.0158
384.75	5.7953	0.11833	11.869	13.734	3.5949	1.7395	5.5245	5.2725		0.89318	17.322	3.1112	4.4238	1.0185	3.229	6.058	4.4121		3.9194	5.1483	1.2542	2.3138	2.28	16.715	6.4581	5.6867		1.0428	1.2387	1.0882	1.0901	2.1216	2.0201	2.1026	10.827		21.59	22.924	2.5179	6.2758	14.819	83.527	23.897	84.628		1.4934	30.368	9.3425	0.99854
385.269	5.8231	0.11589	11.687	13.285	3.66	1.7324	5.5495	5.1282		0.88917	16.886	2.9865	4.478	1.0238	3.163	5.8239	4.3879		3.6195	5.0067	1.2205	2.2752	2.2863	15.77	6.4938	5.6873		1.0265	1.2231	1.1254	1.1164	2.1646	1.7982	2.0487	10.749		21.045	21.71	3.3869	6.4151	14.878	82.064	23.27	78.713		1.591	29.808	8.8826	0.98068
385.788	5.8536	0.11361	11.524	12.797	3.7202	1.7241	5.5696	5.0485		0.89417	16.482	2.8714	4.5243	1.0254	3.0881	5.5931	4.3666		3.3451	4.8832	1.1875	2.2494	2.282	14.973	6.5098	5.6835		1.0091	1.2164	1.1675	1.1442	2.2071	1.5976	1.9893	10.693		20.635	20.452	4.5507	6.5492	14.913	80.114	22.744	72.66		1.6915	29.266	8.4155	0.96231
386.308	5.8839	0.11149	11.385	12.282	3.7751	1.715	5.5849	5.03		0.90794	16.106	2.7661	4.5622	1.0234	3.0059	5.3678	4.3468		3.0978	4.7796	1.1562	2.2363	2.2674	14.336	6.5057	5.6745		0.99084	1.2185	1.2141	1.1726	2.2487	1.4186	1.9251	10.663		20.371	19.16	6.0186	6.6787	14.926	77.72	22.311	66.534		1.7934	28.753	7.9433	0.94365
386.827	5.911	0.10954	11.27	11.755	3.8246	1.7051	5.5955	5.0684		0.93026	15.761	2.6708	4.5915	1.0177	2.9183	5.1499	4.3268		2.8787	4.6981	1.1275	2.2356	2.243	13.865	6.4817	5.6595		0.97216	1.229	1.2641	1.2003	2.2888	1.2613	1.8569	10.662		20.26	17.849	7.7968	6.8042	14.916	74.936	21.964	60.402		1.8948	28.277	7.4683	0.92496
387.346	5.9323	0.10775	11.184	11.229	3.8683	1.6946	5.6016	5.1584		0.96088	15.445	2.5854	4.6119	1.0087	2.827	4.9407	4.3056		2.6891	4.6406	1.1022	2.2467	2.2096	13.564	6.4379	5.6378		0.95337	1.2474	1.3168	1.2264	2.327	1.1255	1.7855	10.694		20.305	16.528	9.8876	6.9263	14.885	71.826	21.692	54.331		1.9941	27.842	6.9935	0.90658
387.865	5.9455	0.10613	11.126	10.717	3.906	1.6836	5.6033	5.2943		0.9996	15.162	2.5096	4.6234	0.99663	2.7341	4.7412	4.2822		2.53	4.609	1.0812	2.2686	2.1681	13.434	6.375	5.6089		0.9348	1.2733	1.3712	1.25	2.3629	1.0108	1.7121	10.757		20.506	15.212	12.289	7.0455	14.832	68.456	21.483	48.386		2.0892	27.454	6.5219	0.88891
388.385	5.9485	0.10469	11.098	10.232	3.9373	1.6724	5.6007	5.4696		1.0462	14.911	2.443	4.626	0.98191	2.6413	4.5519	4.2558		2.4027	4.605	1.065	2.3002	2.1201	13.473	6.294	5.5721		0.91677	1.306	1.4264	1.2702	2.396	0.91652	1.6377	10.853		20.861	13.911	14.997	7.162	14.756	64.9	21.323	42.632		2.1785	27.113	6.0572	0.8724
388.904	5.9397	0.10343	11.099	9.7862	3.9619	1.661	5.5936	5.6776		1.1005	14.696	2.385	4.6195	0.965	2.5506	4.3732	4.2261		2.3085	4.6297	1.0544	2.3403	2.0668	13.674	6.1962	5.5269		0.89959	1.3447	1.4813	1.2865	2.4261	0.8417	1.5633	10.979		21.363	12.637	17.998	7.2761	14.655	61.232	21.2	37.13		2.2602	26.818	5.603	0.85756
389.423	5.9182	0.10234	11.129	9.3909	3.9793	1.6496	5.5819	5.9113		1.1625	14.517	2.335	4.604	0.9464	2.4635	4.2048	4.193		2.2489	4.6841	1.0497	2.3873	2.0102	14.029	6.0835	5.4729		0.88353	1.3887	1.535	1.2982	2.4527	0.78531	1.4901	11.133		22.001	11.401	21.279	7.3878	14.528	57.525	21.099	31.941		2.3327	26.569	5.1631	0.84493
389.942	5.8832	0.10142	11.187	9.0552	3.9893	1.6384	5.5653	6.1639		1.2319	14.376	2.2923	4.5793	0.92666	2.3817	4.0465	4.1566		2.2252	4.7684	1.0513	2.4397	1.9518	14.527	5.9579	5.4096		0.86886	1.4371	1.5864	1.3051	2.4756	0.74614	1.4191	11.311		22.762	10.212	24.819	7.4972	14.372	53.849	21.005	27.12		2.3946	26.361	4.7412	0.83506
390.462	5.8346	0.10068	11.269	8.7869	3.9912	1.6275	5.5437	6.4287		1.3088	14.273	2.256	4.5451	0.90633	2.3065	3.8974	4.1173		2.2393	4.8825	1.0595	2.4958	1.8934	15.153	5.8218	5.3369		0.8558	1.4892	1.6348	1.3068	2.4946	0.72291	1.3514	11.508		23.63	9.0795	28.591	7.604	14.184	50.272	20.904	22.719		2.4446	26.189	4.3409	0.82852
390.981	5.7728	0.1001	11.373	8.5914	3.9849	1.617	5.5165	6.6992		1.3932	14.208	2.2252	4.5015	0.886	2.2391	3.7569	4.0756		2.2927	5.0257	1.0741	2.5538	1.8367	15.893	5.6782	5.2547		0.84456	1.5441	1.6792	1.3032	2.5096	0.71428	1.288	11.72		24.587	8.0117	32.564	7.7081	13.961	46.852	20.785	18.787		2.482	26.048	3.9656	0.82585
391.5	5.6984	0.099703	11.497	8.4723	3.9698	1.607	5.4836	6.9693		1.485	14.18	2.1993	4.4479	0.86622	2.1803	3.6241	4.0323		2.3871	5.1968	1.0951	2.612	1.7835	16.728	5.5301	5.163		0.83529	1.6009	1.719	1.2945	2.5204	0.71891	1.2299	11.94		25.612	7.0161	36.703	7.8089	13.699	43.644	20.634	15.368		2.506	25.932	3.6182	0.82756
392.019	5.6127	0.09947	11.636	8.4305	3.9456	1.5976	5.4445	7.2337		1.5842	14.187	2.1775	4.3844	0.84754	2.1309	3.4978	3.9884		2.5243	5.3939	1.1222	2.6688	1.7351	17.641	5.3807	5.0623		0.82812	1.6587	1.7536	1.2807	2.527	0.73549	1.1778	12.165		26.683	6.0989	40.966	7.906	13.396	40.69	20.444	12.499		2.5163	25.833	3.3012	0.83411
392.538	5.5169	0.099402	11.786	8.4649	3.9118	1.5888	5.3992	7.4873		1.6909	14.227	2.1591	4.3105	0.83046	2.0911	3.3772	3.9449		2.7055	5.6148	1.1548	2.7227	1.6929	18.612	5.2333	4.953		0.82317	1.7168	1.7824	1.2621	2.5295	0.76273	1.1324	12.389		27.776	5.2656	45.308	7.999	13.05	38.027	20.205	10.213		2.5129	25.746	3.0165	0.84588
393.058	5.413	0.099498	11.943	8.5717	3.8681	1.5807	5.3474	7.7259		1.8051	14.295	2.1435	4.2261	0.81541	2.061	3.2613	3.903		2.9321	5.8569	1.1925	2.7721	1.6579	19.623	5.0915	4.8358		0.8205	1.7742	1.8052	1.2392	2.5278	0.79945	1.0945	12.608		28.869	4.5206	49.679	8.0871	12.659	35.679	19.913	8.5359		2.4962	25.664	2.7656	0.86318
393.577	5.3028	0.099754	12.103	8.7452	3.8142	1.5734	5.2891	7.9458		1.9267	14.389	2.1302	4.1311	0.80279	2.0404	3.1493	3.8637		3.2049	6.1171	1.2343	2.816	1.6309	20.653	4.9586	4.7116		0.82015	1.83	1.8218	1.2123	2.5223	0.84452	1.0643	12.817		29.937	3.8676	54.027	8.1697	12.222	33.664	19.565	7.4882		2.4668	25.581	2.5491	0.88618
394.096	5.1887	0.10017	12.26	8.9777	3.7499	1.5667	5.2245	8.144		2.0557	14.502	2.119	4.0257	0.7929	2.0287	3.0405	3.8283		3.5242	6.3923	1.2794	2.8532	1.6122	21.686	4.8376	4.5816		0.82213	1.8835	1.8321	1.1823	2.5128	0.89691	1.0424	13.013		30.957	3.3091	58.298	8.2461	11.739	31.987	19.159	7.0822		2.4257	25.49	2.3671	0.91496
394.615	5.0729	0.10074	12.412	9.2594	3.6751	1.5608	5.1538	8.3181		2.1919	14.63	2.1096	3.9099	0.78597	2.0253	2.9343	3.798		3.8899	6.6792	1.3268	2.8831	1.6022	22.704	4.7316	4.4468		0.82644	1.9338	1.8363	1.1495	2.4996	0.95566	1.0288	13.195		31.907	2.8469	62.434	8.3154	11.214	30.649	18.699	7.3234		2.374	25.388	2.2189	0.94949
395.135	4.9579	0.10145	12.554	9.5795	3.59	1.5554	5.0772	8.4663		2.335	14.767	2.102	3.7842	0.78214	2.029	2.8305	3.7738		4.3012	6.9744	1.3755	2.9051	1.6005	23.691	4.643	4.3088		0.83304	1.98	1.8345	1.1149	2.4829	1.0199	1.0235	13.36		32.765	2.4818	66.381	8.3767	10.648	29.64	18.187	8.2098		2.3132	25.269	2.1034	0.98957
395.654	4.8463	0.10232	12.683	9.9259	3.4946	1.5507	4.9953	8.5872		2.4848	14.907	2.0962	3.6492	0.78145	2.0387	2.7287	3.7567		4.7564	7.2749	1.4243	2.9189	1.6067	24.633	4.5739	4.169		0.84189	2.0214	1.8273	1.0792	2.4627	1.0888	1.0264	13.508		33.512	2.214	70.083	8.429	10.045	28.945	17.63	9.7313		2.2451	25.13	2.0188	1.0349
396.173	4.7408	0.10332	12.796	10.286	3.3897	1.5464	4.9085	8.6799		2.6407	15.045	2.0925	3.5058	0.78386	2.053	2.629	3.7476		5.2532	7.5777	1.4721	2.9247	1.6201	25.521	4.5258	4.0289		0.85291	2.0572	1.8151	1.043	2.439	1.1615	1.0371	13.639		34.131	2.0429	73.488	8.4712	9.4127	28.542	17.035	11.87		2.1714	24.968	1.9627	1.085
396.692	4.6439	0.10446	12.891	10.646	3.2758	1.5424	4.8176	8.7438		2.8022	15.178	2.0911	3.3551	0.78924	2.0704	2.5315	3.7473		5.7881	7.8803	1.5178	2.9228	1.6395	26.343	4.4998	3.8899		0.86601	2.0867	1.7987	1.0073	2.4121	1.2373	1.0552	13.754		34.607	1.9671	76.547	8.502	8.7564	28.406	16.41	14.6		2.0943	24.782	1.9324	1.1394
397.212	4.558	0.10573	12.966	10.994	3.154	1.5387	4.7234	8.7788		2.9685	15.301	2.0925	3.1984	0.79738	2.0894	2.4365	3.7564		6.3569	8.1806	1.5604	2.9136	1.6637	27.093	4.4963	3.7536		0.88108	2.1092	1.7787	0.97279	2.382	1.3155	1.08	13.855		34.927	1.9847	79.218	8.5198	8.0844	28.509	15.765	17.887		2.0158	24.57	1.9248	1.1973
397.731	4.4858	0.10712	13.02	11.317	3.0256	1.5351	4.6267	8.7849		3.1387	15.412	2.0969	3.0372	0.80801	2.1084	2.3443	3.7754		6.9545	8.4769	1.5989	2.8978	1.6914	27.766	4.5151	3.6214		0.89799	2.1243	1.756	0.94024	2.3488	1.3953	1.1108	13.942		35.083	2.0932	81.461	8.523	7.4054	28.821	15.108	21.69		1.938	24.331	1.9366	1.2579
398.25	4.4293	0.10862	13.053	11.604	2.892	1.5314	4.5286	8.7625		3.312	15.512	2.1051	2.8735	0.82079	2.1259	2.2555	3.8044		7.5747	8.768	1.6325	2.8765	1.7208	28.361	4.5555	3.4945		0.91659	2.1315	1.7315	0.91038	2.3125	1.4761	1.1467	14.019		35.066	2.2898	83.248	8.5097	6.7289	29.312	14.451	25.959		1.863	24.067	1.9642	1.3203
398.769	4.3906	0.11021	13.064	11.844	2.7551	1.5276	4.4303	8.7122		3.4871	15.601	2.1175	2.709	0.83536	2.1404	2.1705	3.8435		8.2106	9.0534	1.6604	2.8505	1.7505	28.878	4.6162	3.3741		0.93671	2.1304	1.7062	0.88389	2.2734	1.5569	1.1868	14.086		34.875	2.571	84.554	8.478	6.065	29.952	13.803	30.636		1.7927	23.778	2.0041	1.3835
399.288	4.3714	0.11189	13.054	12.03	2.6167	1.5235	4.3331	8.635		3.6628	15.683	2.1346	2.546	0.85132	2.1507	2.0899	3.8925		8.8546	9.3329	1.6821	2.8209	1.7787	29.318	4.6954	3.2613		0.95815	2.1209	1.6809	0.86139	2.2315	1.6372	1.2298	14.146		34.508	2.933	85.368	8.4255	5.4238	30.712	13.172	35.658		1.729	23.465	2.0529	1.4465
399.808	4.3731	0.11363	13.023	12.155	2.4791	1.5189	4.2387	8.5318		3.8377	15.764	2.1569	2.3868	0.86832	2.1556	2.0142	3.9509		9.4984	9.6069	1.6974	2.7889	1.804	29.685	4.791	3.157		0.98068	2.1028	1.6566	0.84345	2.187	1.7161	1.2749	14.201		33.969	3.3717	85.684	8.3503	4.8155	31.567	12.567	40.955		1.6736	23.131	2.1071	1.5083
400.327	4.3964	0.11543	12.973	12.214	2.3443	1.5138	4.1487	8.4042		4.0104	15.853	2.185	2.2336	0.88598	2.154	1.9441	4.0181		10.133	9.876	1.706	2.7555	1.8249	29.984	4.9002	3.062		1.0041	2.0762	1.6342	0.83055	2.1403	1.7929	1.3208	14.25		33.262	3.8828	85.506	8.25	4.2504	32.491	11.995	46.45		1.6279	22.777	2.1636	1.5676
400.846	4.4418	0.11725	12.904	12.206	2.2149	1.508	4.0648	8.2539		4.1794	15.961	2.2192	2.0889	0.90401	2.1453	1.88	4.0931		10.75	10.141	1.708	2.7218	1.8403	30.221	5.0204	2.977		1.028	2.0413	1.6144	0.82308	2.0915	1.8667	1.3664	14.296		32.397	4.4616	84.847	8.1226	3.738	33.466	11.462	52.064		1.5929	22.407	2.2196	1.6234
401.365	4.5093	0.11908	12.818	12.129	2.0929	1.5016	3.9891	8.083		4.343	16.103	2.26	1.955	0.92218	2.1288	1.8225	4.1746		11.341	10.404	1.7038	2.6885	1.849	30.402	5.1483	2.9025		1.0523	1.9986	1.5981	0.82138	2.0411	1.9367	1.4108	14.338		31.384	5.103	83.731	7.9664	3.2875	34.474	10.974	57.713		1.5696	22.022	2.2726	1.6747
401.885	4.5982	0.1209	12.715	11.987	1.9808	1.4944	3.9235	7.8939		4.4996	16.295	2.3076	1.834	0.94039	2.1041	1.7719	4.2611		11.896	10.665	1.6937	2.6564	1.8505	30.532	5.2808	2.839		1.0765	1.9483	1.5857	0.82567	1.9893	2.0023	1.4528	14.377		30.237	5.8019	82.184	7.7799	2.9072	35.499	10.534	63.312		1.5583	21.626	2.3205	1.7205
402.404	4.7073	0.12267	12.597	11.783	1.8806	1.4864	3.87	7.6894		4.6477	16.556	2.3622	1.7281	0.95862	2.0713	1.7287	4.3509		12.407	10.927	1.6785	2.6261	1.8442	30.618	5.4145	2.7866		1.1004	1.8913	1.5778	0.83609	1.9365	2.0626	1.4915	14.411		28.969	6.5529	80.244	7.5623	2.6044	36.53	10.146	68.775		1.5594	21.223	2.3617	1.7598
402.923	4.8349	0.12438	12.465	11.523	1.7943	1.4776	3.8305	7.4726		4.7856	16.909	2.4239	1.6391	0.97704	2.0302	1.6932	4.4421		12.867	11.19	1.659	2.5979	1.8299	30.665	5.5462	2.7458		1.1235	1.8283	1.5747	0.85271	1.8832	2.117	1.5263	14.439		27.599	7.3502	77.951	7.313	2.3855	37.557	9.8091	74.018		1.5725	20.814	2.395	1.792
403.442	4.9789	0.12599	12.321	11.213	1.7236	1.4681	3.8066	7.2472		4.9117	17.377	2.4927	1.5687	0.99593	1.9812	1.6656	4.5325		13.269	11.456	1.636	2.5719	1.8077	30.675	5.6727	2.7166		1.1457	1.7602	1.5767	0.87548	1.8296	2.1646	1.5563	14.461		26.143	8.1879	75.349	7.0325	2.2554	38.572	9.5255	78.961		1.5972	20.404	2.4197	1.8163
403.962	5.1364	0.12748	12.165	10.863	1.6702	1.4581	3.7997	7.0167		5.0246	17.984	2.5684	1.5181	1.0158	1.9247	1.6461	4.6199		13.607	11.727	1.6107	2.5481	1.778	30.653	5.791	2.699		1.1664	1.6881	1.5837	0.90431	1.7761	2.205	1.5813	14.474		24.621	9.0596	72.488	6.7218	2.2178	39.568	9.2941	83.529		1.6326	19.996	2.4354	1.8323
404.481	5.3045	0.12883	11.999	10.481	1.6351	1.4475	3.8111	6.7854		5.1229	18.757	2.6507	1.4883	1.0373	1.8613	1.6349	4.702		13.877	12.004	1.5839	2.5262	1.7414	30.598	5.8984	2.6931		1.1853	1.613	1.5957	0.93899	1.7232	2.2375	1.6006	14.477		23.05	9.9588	69.415	6.3826	2.2749	40.538	9.1134	87.651		1.6775	19.592	2.4422	1.8395
405	5.4795	0.13	11.825	10.076	1.6193	1.4366	3.8414	6.5574		5.2054	19.72	2.7391	1.48	1.0612	1.7915	1.6319	4.7766		14.076	12.287	1.5567	2.5059	1.6986	30.511	5.9926	2.6988		1.2021	1.5363	1.6125	0.97924	1.6712	2.2618	1.6144	14.469		21.451	10.879	66.18	6.0175	2.4274	41.478	8.9813	91.27		1.7306	19.196	2.4405	1.8379
405.519	5.6578	0.13097	11.644	9.6575	1.6232	1.4256	3.891	6.3372		5.271	20.897	2.8331	1.4934	1.0886	1.7163	1.6371	4.8413		14.202	12.577	1.5301	2.4866	1.6506	30.389	6.0716	2.7161		1.2165	1.4594	1.6338	1.0247	1.6204	2.2773	1.6224	14.448		19.842	11.812	62.831	5.6299	2.6743	42.38	8.8948	94.334		1.7902	18.811	2.4312	1.8275
406.038	5.8353	0.13174	11.458	9.2342	1.6472	1.4146	3.9594	6.129		5.3191	22.309	2.9318	1.5285	1.1207	1.6366	1.6505	4.8944		14.254	12.877	1.505	2.4679	1.5984	30.231	6.1339	2.7447		1.2281	1.3836	1.6591	1.075	1.5713	2.2839	1.6248	14.414		18.241	12.751	59.413	5.2236	3.0129	43.236	8.8507	96.806		1.8544	18.44	2.4153	1.8085
406.558	6.0079	0.13226	11.269	8.8142	1.6908	1.4039	4.0459	5.9373		5.349	23.974	3.0344	1.5849	1.1588	1.5531	1.6719	4.9339		14.234	13.184	1.4822	2.4491	1.5431	30.031	6.1787	2.7845		1.2368	1.3106	1.688	1.1297	1.5242	2.2815	1.622	14.366		16.666	13.689	55.969	4.8033	3.439	44.041	8.8454	98.658		1.9212	18.086	2.394	1.7814
407.077	6.1715	0.13255	11.078	8.4049	1.7536	1.3937	4.1493	5.7661		5.3605	25.905	3.1396	1.6618	1.2043	1.4668	1.7011	4.9585		14.144	13.501	1.4623	2.4297	1.486	29.785	6.2053	2.8353		1.2423	1.2418	1.7198	1.1881	1.4794	2.27	1.6143	14.305		15.131	14.617	52.538	4.3741	3.9467	44.784	8.8751	99.877		1.9886	17.752	2.3687	1.7468
407.596	6.3219	0.13257	10.886	8.0126	1.8346	1.3843	4.2675	5.6194		5.3536	28.11	3.2464	1.7583	1.2588	1.3788	1.7378	4.9671		13.988	13.826	1.4457	2.4091	1.4283	29.489	6.2139	2.8969		1.2443	1.1789	1.7537	1.2498	1.4374	2.2496	1.6024	14.231		13.653	15.528	49.153	3.9413	4.5285	45.457	8.936	100.46		2.0546	17.442	2.3409	1.7055
408.115	6.4552	0.13234	10.697	7.6426	1.9324	1.3758	4.3981	5.5007		5.3287	30.59	3.3534	1.8731	1.3237	1.2898	1.7817	4.9591		13.77	14.159	1.4329	2.387	1.3709	29.137	6.2051	2.9691		1.2429	1.1237	1.7892	1.3141	1.3984	2.2205	1.5868	14.146		12.244	16.413	45.846	3.5109	5.1756	46.049	9.024	100.43		2.1169	17.162	2.3123	1.6585
408.635	6.5676	0.13184	10.51	7.2987	2.0455	1.3687	4.5383	5.4133		5.2866	33.339	3.4591	2.0047	1.4007	1.2009	1.8324	4.9341		13.496	14.498	1.4241	2.3629	1.3151	28.726	6.1799	3.0515		1.238	1.0777	1.8255	1.3803	1.3629	2.1834	1.5684	14.051		10.916	17.263	42.64	3.0889	5.8777	46.55	9.1356	99.796		2.1736	16.915	2.2844	1.6069
409.154	6.656	0.13109	10.328	6.9837	2.1719	1.363	4.6847	5.3598		5.2282	36.344	3.562	2.1514	1.4912	1.1128	1.8892	4.8925		13.172	14.844	1.4191	2.3368	1.2618	28.25	6.1397	3.1438		1.2295	1.0427	1.8616	1.4477	1.3313	2.1387	1.5479	13.951		9.6784	18.072	39.555	2.6812	6.6233	46.951	9.2671	98.606		2.2228	16.709	2.2588	1.5522
409.673	6.7175	0.1301	10.151	6.6992	2.3096	1.359	4.8338	5.3425		5.155	39.584	3.6605	2.3116	1.5964	1.0265	1.9517	4.8347		12.803	15.193	1.4178	2.3086	1.2118	27.708	6.0863	3.2457		1.2176	1.0202	1.897	1.5156	1.3038	2.0872	1.5262	13.846		8.5396	18.83	36.608	2.294	7.4	47.241	9.415	96.908		2.2629	16.549	2.2367	1.4956
410.192	6.7498	0.12888	9.9818	6.4456	2.4561	1.3568	4.9817	5.3628		5.0686	43.032	3.7532	2.4833	1.7175	0.94265	2.0192	4.7617		12.398	15.543	1.42	2.2783	1.1659	27.097	6.0219	3.3568		1.2025	1.012	1.9307	1.5833	1.281	2.0297	1.5042	13.74		7.5057	19.531	33.809	1.9332	8.1948	47.414	9.5759	94.758		2.2924	16.445	2.2196	1.4386
410.712	6.7516	0.12745	9.8212	6.2222	2.6091	1.3566	5.1245	5.4219		4.971	46.65	3.8386	2.6648	1.8553	0.86211	2.0907	4.6748		11.963	15.893	1.4253	2.2462	1.1245	26.418	5.9486	3.4765		1.1845	1.0195	1.9621	1.65	1.263	1.9673	1.4827	13.637		6.5816	20.168	31.168	1.6044	8.994	47.462	9.7467	92.225		2.3102	16.406	2.2085	1.3828
411.231	6.7219	0.12584	9.6708	6.0275	2.7659	1.3585	5.2583	5.5202		4.8641	50.398	3.9152	2.8543	2.0102	0.78562	2.1655	4.5754		11.504	16.238	1.4331	2.2125	1.088	25.672	5.869	3.6044		1.1639	1.0441	1.9904	1.7149	1.2501	1.9011	1.4627	13.538		5.77	20.734	28.688	1.3131	9.7837	47.382	9.9242	89.38		2.3154	16.44	2.2042	1.3296
411.75	6.6609	0.12408	9.5323	5.8592	2.9241	1.3624	5.3795	5.6575		4.7504	54.226	3.9818	3.0502	2.1826	0.71389	2.2424	4.4652		11.028	16.576	1.4428	2.1775	1.0566	24.864	5.7854	3.7398		1.1411	1.087	2.015	1.7773	1.2427	1.832	1.4448	13.447		5.0722	21.224	26.373	1.0642	10.55	47.172	10.105	86.302		2.3075	16.561	2.2073	1.2803
412.269	6.5694	0.12221	9.4075	5.7145	3.0811	1.3685	5.4846	5.8329		4.632	58.081	4.0373	3.251	2.3719	0.64767	2.3202	4.3461		10.541	16.903	1.4538	2.1417	1.0304	24	5.7004	3.8821		1.1167	1.1493	2.0351	1.8364	1.2408	1.7613	1.43	13.365		4.4881	21.634	24.223	0.8624	11.28	46.832	10.287	83.071		2.2865	16.778	2.2181	1.2365
412.788	6.4492	0.12025	9.2984	5.5901	3.2345	1.3766	5.5708	6.045		4.5115	61.904	4.081	3.4552	2.5775	0.58768	2.3978	4.2198		10.049	17.215	1.4655	2.1055	1.0092	23.087	5.6162	4.0305		1.0913	1.2316	2.0504	1.8915	1.2447	1.6902	1.4187	13.294		4.0158	21.961	22.237	0.71176	11.961	46.367	10.466	79.766		2.2524	17.104	2.2367	1.1992
413.308	6.3028	0.11827	9.2071	5.4826	3.382	1.3866	5.6357	6.2917		4.391	65.636	4.1122	3.662	2.798	0.53467	2.4737	4.0881		9.5571	17.508	1.477	2.0692	0.9927	22.136	5.5352	4.1841		1.0653	1.3345	2.0603	1.9419	1.2543	1.6199	1.4116	13.234		3.6524	22.202	20.414	0.61587	12.582	45.783	10.639	76.469		2.2061	17.551	2.2628	1.1696
413.827	6.1334	0.11628	9.1356	5.3882	3.5215	1.3984	5.6776	6.5705		4.2728	69.215	4.1306	3.8702	3.0318	0.48939	2.5465	3.9527		9.0692	17.777	1.4878	2.0332	0.98057	21.157	5.4592	4.3421		1.0395	1.458	2.0643	1.9869	1.2697	1.5515	1.4092	13.187		3.3933	22.358	18.75	0.57771	13.131	45.089	10.804	73.256		2.1483	18.131	2.2957	1.1486
414.346	5.945	0.11435	9.0861	5.3035	3.651	1.4118	5.6955	6.878		4.1589	72.579	4.1362	4.0793	3.2765	0.45262	2.6149	3.8152		8.5898	18.018	1.4973	1.9979	0.97227	20.164	5.3902	4.5035		1.0145	1.602	2.0623	2.0259	1.2907	1.4861	1.4116	13.15		3.233	22.429	17.241	0.59968	13.6	44.297	10.957	70.199		2.0803	18.854	2.3348	1.1369
414.865	5.7421	0.1125	9.0606	5.2252	3.7689	1.4266	5.6893	7.2108		4.0509	75.669	4.1292	4.2888	3.5295	0.42516	2.6774	3.6771		8.1226	18.225	1.5048	1.9634	0.96719	19.17	5.3295	4.6673		0.99093	1.7656	2.0539	2.0582	1.3172	1.4248	1.4192	13.124		3.1651	22.419	15.885	0.68353	13.981	43.42	11.095	67.369		2.0036	19.731	2.3787	1.135
415.385	5.5294	0.11079	9.061	5.1502	3.8738	1.4425	5.6597	7.5647		3.9504	78.428	4.1102	4.4983	3.7875	0.40781	2.7327	3.5397		7.6706	18.394	1.5099	1.9301	0.9647	18.189	5.2785	4.8325		0.96938	1.9479	2.039	2.0836	1.349	1.3685	1.4319	13.105		3.1818	22.33	14.674	0.83038	14.269	42.473	11.215	64.828		1.9199	20.769	2.4263	1.1431
415.904	5.3123	0.10926	9.0887	5.0759	3.9645	1.4591	5.608	7.9351		3.8584	80.804	4.0798	4.7076	4.0473	0.40139	2.7796	3.4041		7.2368	18.52	1.5121	1.8979	0.96408	17.236	5.2381	4.9978		0.95039	2.1473	2.0177	2.1015	1.3857	1.3181	1.4498	13.093		3.2748	22.17	13.605	1.0406	14.461	41.473	11.314	62.633		1.8311	21.975	2.4759	1.1613
416.423	5.0959	0.10793	9.1451	5.0003	4.0402	1.4762	5.5363	8.3175		3.7756	82.751	4.039	4.9167	4.305	0.40673	2.817	3.2714		6.8235	18.599	1.5113	1.8671	0.96463	16.325	5.209	5.1624		0.93445	2.3618	1.9901	2.1116	1.4268	1.2743	1.4726	13.084		3.435	21.946	12.671	1.314	14.555	40.438	11.391	60.834		1.7392	23.352	2.5261	1.1892
416.942	4.8856	0.10686	9.2307	4.9216	4.1003	1.4935	5.4474	8.7068		3.7024	84.23	3.989	5.1253	4.5569	0.42463	2.8442	3.1425		6.4329	18.625	1.5073	1.8375	0.96565	15.469	5.1914	5.325		0.92194	2.5889	1.9564	2.1138	1.4718	1.2379	1.5002	13.076		3.6528	21.665	11.867	1.6494	14.552	39.385	11.444	59.472		1.6461	24.9	2.5749	1.2265
417.462	4.6864	0.10606	9.3457	4.8389	4.1445	1.5106	5.3447	9.0981		3.6387	85.211	3.931	5.3334	4.7989	0.45586	2.8605	3.0183		6.0671	18.596	1.5001	1.8091	0.96649	14.68	5.1857	5.4847		0.91317	2.8259	1.917	2.1081	1.5201	1.2092	1.5321	13.066		3.9181	21.338	11.185	2.0451	14.454	38.334	11.47	58.584		1.5538	26.618	2.6208	1.2724
417.981	4.5032	0.10557	9.4898	4.7514	4.173	1.5272	5.2319	9.4864		3.584	85.672	3.8665	5.5407	5.0274	0.50114	2.8656	2.8998		5.7278	18.507	1.4899	1.7818	0.96653	13.969	5.1916	5.6402		0.90832	3.0697	1.8724	2.0943	1.5709	1.1888	1.568	13.052		4.2206	20.977	10.618	2.4987	14.266	37.303	11.468	58.197		1.4645	28.498	2.662	1.326
418.5	4.3403	0.1054	9.6618	4.6591	4.1861	1.5431	5.1131	9.8667		3.5375	85.604	3.7969	5.7469	5.2387	0.56108	2.8595	2.7878		5.4167	18.356	1.477	1.7553	0.96526	13.345	5.2089	5.7908		0.90749	3.3167	1.8233	2.0728	1.6234	1.1769	1.6075	13.031		4.55	20.592	10.161	3.0067	13.993	36.31	11.44	58.329		1.38	30.531	2.6969	1.386
419.019	4.2019	0.10557	9.8602	4.5622	4.1844	1.558	4.9926	10.234		3.4982	85.004	3.7237	5.9516	5.4295	0.63621	2.8426	2.6833		5.1354	18.14	1.462	1.7296	0.96223	12.815	5.2369	5.9352		0.91065	3.5632	1.7704	2.0437	1.6768	1.1737	1.6501	13.001		4.8959	20.196	9.8041	3.5651	13.644	35.373	11.383	58.991		1.3021	32.705	2.7241	1.4512
419.538	4.0911	0.10608	10.083	4.4614	4.1688	1.5717	4.8746	10.585		3.4649	83.882	3.6484	6.154	5.5972	0.72686	2.8153	2.5876		4.8855	17.858	1.4453	1.7044	0.9571	12.386	5.2752	6.0727		0.91767	3.8052	1.7146	2.0076	1.73	1.1792	1.6953	12.962		5.2483	19.803	9.5413	4.169	13.227	34.509	11.301	60.186		1.2325	35.002	2.7422	1.52
420.058	4.0108	0.10693	10.326	4.3575	4.1405	1.5841	4.7635	10.913		3.4358	82.26	3.5725	6.3532	5.7394	0.83322	2.7785	2.5017		4.6685	17.509	1.4279	1.6795	0.94964	12.06	5.3228	6.2023		0.92832	4.039	1.6568	1.9648	1.782	1.1934	1.7426	12.913		5.5977	19.424	9.3648	4.8127	12.753	33.733	11.193	61.907		1.1728	37.404	2.7501	1.591
420.577	3.9628	0.10812	10.587	4.2518	4.1011	1.5949	4.6633	11.216		3.4096	80.167	3.4975	6.5481	5.8544	0.95522	2.7333	2.427		4.486	17.092	1.4105	1.6547	0.93972	11.841	5.3789	6.3232		0.94229	4.2603	1.5981	1.9159	1.8319	1.2162	1.7917	12.854		5.9351	19.073	9.2671	5.49	12.232	33.062	11.063	64.14		1.1242	39.887	2.7472	1.6623
421.096	3.9485	0.10963	10.862	4.1452	4.052	1.6041	4.578	11.491		3.3845	77.643	3.4248	6.7373	5.9412	1.0926	2.6809	2.365		4.3397	16.609	1.3942	1.6298	0.9273	11.727	5.4424	6.4347		0.95917	4.4653	1.5395	1.8617	1.8786	1.2471	1.8419	12.787		6.2523	18.763	9.2411	6.1936	11.676	32.507	10.915	66.862		1.0879	42.428	2.7327	1.7323
421.615	3.9683	0.11145	11.145	4.039	3.9953	1.6116	4.5111	11.733		3.3588	74.736	3.3557	6.9195	5.9994	1.2446	2.6227	2.3173		4.2312	16.062	1.38	1.6047	0.91246	11.719	5.5122	6.5361		0.9785	4.6502	1.482	1.8028	1.921	1.2859	1.8931	12.713		6.5421	18.504	9.28	6.916	11.097	32.082	10.751	70.041		1.0646	44.999	2.7065	1.7992
422.135	4.0219	0.11354	11.432	3.9345	3.9327	1.6175	4.4658	11.941		3.3313	71.501	3.2918	7.0928	6.0291	1.4105	2.5601	2.2853		4.1623	15.454	1.3688	1.5791	0.89534	11.813	5.5872	6.6268		0.99976	4.8116	1.4266	1.7401	1.9582	1.3319	1.9446	12.635		6.7985	18.309	9.3773	7.6488	10.505	31.797	10.578	73.64		1.0549	47.575	2.6685	1.8616
422.654	4.1084	0.11588	11.719	3.8325	3.8664	1.6217	4.4448	12.112		3.3004	67.996	3.2343	7.2557	6.0311	1.589	2.4948	2.2707		4.1348	14.789	1.362	1.553	0.87617	12.005	5.6662	6.7062		1.0224	4.9463	1.3745	1.6744	1.9894	1.3846	1.9963	12.556		7.0166	18.186	9.5268	8.3834	9.9119	31.66	10.4	77.61		1.0592	50.126	2.619	1.9177
423.173	4.226	0.11843	11.998	3.7341	3.7983	1.6244	4.4506	12.246		3.2652	64.287	3.1846	7.4065	6.0067	1.7785	2.4281	2.2749		4.1503	14.072	1.3603	1.5263	0.85526	12.289	5.748	6.7739		1.0459	5.0516	1.3264	1.6065	2.0137	1.4433	2.0477	12.48		7.1929	18.146	9.7231	9.1109	9.3274	31.679	10.224	81.899		1.0773	52.625	2.5585	1.9664
423.692	4.3724	0.12116	12.264	3.64	3.7304	1.6255	4.4848	12.342		3.2248	60.439	3.1437	7.5433	5.9572	1.9772	2.3615	2.2994		4.2105	13.311	1.3648	1.4989	0.83293	12.659	5.8313	6.8295		1.0697	5.1253	1.2831	1.5373	2.0305	1.5071	2.0985	12.408		7.3251	18.194	9.9608	9.8221	8.7607	31.862	10.057	86.447		1.1091	55.045	2.4878	2.0065
424.212	4.5446	0.12401	12.513	3.5509	3.6646	1.6253	4.549	12.4		3.1788	56.517	3.113	7.6646	5.8848	2.1827	2.2965	2.3455		4.3168	12.512	1.3765	1.4709	0.80959	13.109	5.9148	6.8727		1.0932	5.1658	1.2454	1.4676	2.0393	1.5752	2.1484	12.346		7.4126	18.338	10.235	10.508	8.2199	32.212	9.9056	91.19		1.1539	57.36	2.4078	2.0372
424.731	4.7393	0.12695	12.739	3.4672	3.6025	1.6239	4.6438	12.422		3.127	52.587	3.0935	7.769	5.7913	2.3925	2.2341	2.414		4.4701	11.686	1.3958	1.4422	0.78566	13.63	5.9971	6.9034		1.1161	5.1721	1.2137	1.3982	2.0399	1.6466	2.1971	12.295		7.4558	18.582	10.542	11.16	7.7114	32.734	9.7772	96.06		1.2108	59.548	2.3197	2.0577
425.25	4.9526	0.12994	12.937	3.3896	3.5458	1.6215	4.7697	12.41		3.0697	48.71	3.0861	7.8553	5.679	2.604	2.1754	2.5057		4.6712	10.841	1.4236	1.4131	0.76156	14.213	6.077	6.9213		1.1377	5.1439	1.1885	1.33	2.0319	1.7202	2.2444	12.259		7.4565	18.929	10.876	11.769	7.2406	33.43	9.6788	100.99		1.2787	61.588	2.2248	2.0678
425.769	5.1806	0.13291	13.102	3.3182	3.4957	1.6182	4.9265	12.365		3.0074	44.944	3.0919	7.9226	5.5501	2.8141	2.1213	2.621		4.92	9.988	1.4599	1.3836	0.73776	14.851	6.1529	6.9263		1.1579	5.0815	1.1698	1.2637	2.0155	1.7948	2.2899	12.239		7.4176	19.381	11.235	12.328	6.8109	34.301	9.6168	105.9		1.3562	63.463	2.1244	2.0674
426.288	5.4188	0.13584	13.231	3.2537	3.4531	1.6141	5.1134	12.292		2.9412	41.34	3.1113	7.9703	5.4067	3.0196	2.0723	2.7599		5.2158	9.138	1.505	1.3539	0.71471	15.533	6.2235	6.9185		1.1764	4.9859	1.1578	1.1998	1.991	1.8694	2.3332	12.237		7.3432	19.939	11.613	12.829	6.4246	35.348	9.5972	110.72		1.4416	65.159	2.0202	2.0569
426.808	5.6629	0.13868	13.321	3.1963	3.4187	1.6095	5.3293	12.194		2.8722	37.944	3.1451	7.9981	5.2511	3.2174	2.0291	2.9221		5.5571	8.3023	1.5588	1.3244	0.69285	16.253	6.2873	6.8977		1.1929	4.8589	1.1523	1.1391	1.9586	1.9426	2.3742	12.251		7.2379	20.602	12.007	13.268	6.0822	36.57	9.6248	115.38		1.5331	66.669	1.9136	2.0369
427.327	5.9082	0.1414	13.37	3.1466	3.3931	1.6046	5.5727	12.076		2.802	34.796	3.1934	8.0059	5.085	3.4041	1.9917	3.1068		5.9415	7.4923	1.6208	1.2952	0.67261	17.001	6.3429	6.8642		1.2073	4.7028	1.1529	1.0819	1.9191	2.0133	2.4124	12.28		7.1072	21.367	12.411	13.639	5.783	37.963	9.7032	119.82		1.6289	67.988	1.8062	2.008
427.846	6.1505	0.14395	13.377	3.1055	3.3761	1.5995	5.8414	11.943		2.7323	31.924	3.2563	7.9941	4.9105	3.5768	1.9603	3.313		6.3654	6.7194	1.6903	1.2666	0.6544	17.77	6.3891	6.818		1.2197	4.5207	1.1592	1.0289	1.8731	2.0801	2.4474	12.324		6.9572	22.232	12.822	13.938	5.525	39.525	9.8346	123.98		1.7268	69.118	1.6994	1.9715
428.365	6.3851	0.1463	13.341	3.0738	3.3676	1.5943	6.1331	11.799		2.6649	29.353	3.3337	7.9631	4.7292	3.7323	1.9348	3.5392		6.8247	5.9949	1.7666	1.239	0.63859	18.551	6.4247	6.7594		1.2302	4.3159	1.1707	0.98018	1.8216	2.1418	2.4789	12.378		6.7941	23.193	13.235	14.164	5.3051	41.249	10.019	127.79		1.8248	70.064	1.5948	1.9286
428.885	6.6079	0.14843	13.263	3.0527	3.3669	1.5893	6.445	11.65		2.6019	27.098	3.425	7.9137	4.5427	3.8678	1.915	3.7836		7.3139	5.3292	1.8485	1.2126	0.62553	19.339	6.4486	6.6886		1.2389	4.0923	1.1866	0.93613	1.7655	2.1971	2.5064	12.438		6.6242	24.246	13.642	14.316	5.1194	43.129	10.256	131.2		1.9207	70.835	1.4937	1.8807
429.404	6.8148	0.15031	13.146	3.0435	3.3733	1.5845	6.7742	11.501		2.5453	25.166	3.5297	7.8465	4.3522	3.981	1.9005	4.0442		7.8268	4.7323	1.9347	1.1876	0.61551	20.128	6.4599	6.6062		1.2461	3.8541	1.2062	0.8969	1.7059	2.2448	2.5294	12.501		6.454	25.385	14.039	14.394	4.9632	45.155	10.542	134.17		2.0124	71.445	1.3973	1.8294
429.923	7.0019	0.15194	12.99	3.0481	3.3855	1.5802	7.1173	11.357		2.497	23.557	3.6466	7.7624	4.1591	4.0697	1.891	4.3188		8.3563	4.2132	2.0238	1.1643	0.60877	20.914	6.4579	6.5126		1.252	3.6058	1.2285	0.86259	1.6439	2.2839	2.5474	12.561		6.2895	26.605	14.418	14.402	4.8317	47.318	10.873	136.67		2.0981	71.91	1.3069	1.7763
430.442	7.1656	0.15329	12.799	3.0682	3.4022	1.5762	7.4711	11.222		2.4589	22.265	3.7746	7.6622	3.9644	4.1324	1.8861	4.6047		8.8945	3.78	2.1142	1.1429	0.60553	21.692	6.4422	6.4086		1.2568	3.3519	1.2529	0.83323	1.5809	2.3132	2.5599	12.612		6.1366	27.9	14.774	14.341	4.7195	49.607	11.241	138.65		2.1758	72.247	1.2235	1.7232
430.962	7.3027	0.15436	12.578	3.1061	3.4217	1.5729	7.8318	11.101		2.4325	21.277	3.9121	7.5467	3.7692	4.1677	1.8852	4.8996		9.4331	3.4396	2.2042	1.1236	0.60594	22.461	6.4124	6.2949		1.261	3.0967	1.2783	0.80882	1.5178	2.3319	2.5664	12.65		6.0004	29.264	15.098	14.216	4.6214	52.008	11.639	140.11		2.2439	72.475	1.1478	1.6717
431.481	7.4103	0.15515	12.328	3.164	3.4424	1.5701	8.1959	10.996		2.4193	20.576	4.0574	7.4167	3.5743	4.1753	1.8878	5.2008		9.9634	3.1974	2.2922	1.1065	0.6101	23.22	6.3686	6.1725		1.2649	2.8448	1.304	0.78931	1.4559	2.3393	2.5664	12.669		5.8857	30.689	15.383	14.033	4.5325	54.509	12.057	141.02		2.301	72.612	1.0805	1.6234
432	7.4861	0.15566	12.055	3.2444	3.4624	1.5679	8.5596	10.911		2.4203	20.138	4.2087	7.2727	3.3807	4.1549	1.8936	5.5057		10.477	3.0576	2.3766	1.0916	0.61809	23.969	6.3112	6.0426		1.2686	2.6002	1.3292	0.7746	1.3963	2.3349	2.5596	12.666		5.7962	32.169	15.624	13.797	4.4482	57.095	12.484	141.37		2.3459	72.677	1.0221	1.5799
432.519	7.5282	0.1559	11.763	3.3498	3.4799	1.5664	8.9189	10.846		2.4363	19.938	4.3639	7.1154	3.1892	4.1071	1.9021	5.8119		10.964	3.023	2.4556	1.079	0.62995	24.711	6.2408	5.9063		1.2724	2.3668	1.3531	0.7646	1.34	2.3184	2.5455	12.636		5.7351	33.696	15.812	13.515	4.3642	59.752	12.91	141.17		2.3778	72.683	0.9731	1.5426
433.038	7.5352	0.15589	11.457	3.4827	3.493	1.5654	9.2699	10.803		2.4677	19.947	4.5209	6.9453	3.0006	4.033	1.913	6.117		11.417	3.0946	2.528	1.0687	0.64567	25.448	6.1585	5.765		1.2766	2.1479	1.3752	0.75921	1.288	2.2898	2.5239	12.578		5.7045	35.262	15.943	13.193	4.277	62.466	13.323	140.42		2.3962	72.644	0.93353	1.5128
433.558	7.5063	0.15563	11.139	3.6454	3.5001	1.565	9.6086	10.781		2.5144	20.133	4.6776	6.7629	2.8156	3.9342	1.9258	6.4188		11.828	3.2722	2.5923	1.0606	0.66523	26.185	6.0656	5.62		1.2812	1.9464	1.3949	0.75833	1.241	2.2491	2.4946	12.49		5.7057	36.856	16.011	12.839	4.1837	65.221	13.711	139.14		2.4008	72.57	0.90348	1.4917
434.077	7.4415	0.15516	10.816	3.84	3.4997	1.5651	9.9308	10.781		2.576	20.464	4.8316	6.5689	2.6351	3.8127	1.9405	6.7154		12.189	3.5537	2.6475	1.0548	0.6886	26.925	5.9637	5.4729		1.2863	1.7649	1.412	0.76186	1.1999	2.1969	2.4578	12.373		5.7391	38.469	16.014	12.459	4.0821	68.004	14.064	137.34		2.3917	72.467	0.88285	1.4801
434.596	7.3415	0.1545	10.49	4.0684	3.4902	1.5656	10.232	10.799		2.6516	20.908	4.9809	6.3639	2.4599	3.6711	1.9567	7.0048		12.496	3.9355	2.6928	1.0512	0.71571	27.674	5.8547	5.325		1.2918	1.605	1.426	0.76974	1.1653	2.1336	2.4135	12.229		5.8042	40.088	15.948	12.061	3.9707	70.8	14.371	135.06		2.3693	72.338	0.87145	1.4788
435.115	7.2075	0.15366	10.165	4.3318	3.4708	1.5663	10.509	10.835		2.7401	21.432	5.1232	6.1487	2.2908	3.5124	1.9745	7.2855		12.744	4.4128	2.7275	1.0497	0.7465	28.437	5.7408	5.1776		1.2977	1.4681	1.437	0.78188	1.1375	2.0603	2.3622	12.06		5.8996	41.701	15.813	11.651	3.8486	73.596	14.623	132.32		2.3343	72.182	0.86896	1.4883
435.635	7.0416	0.15269	9.8457	4.6312	3.4406	1.5673	10.757	10.886		2.8399	22.003	5.2565	5.9243	2.1285	3.3398	1.9938	7.5558		12.928	4.9788	2.7514	1.0503	0.78091	29.218	5.6243	5.0321		1.3039	1.355	1.4448	0.79823	1.117	1.9778	2.3044	11.872		6.0232	43.292	15.612	11.235	3.7156	76.376	14.814	129.16		2.2876	71.994	0.875	1.5089
436.154	6.8465	0.15159	9.5341	4.9669	3.3992	1.5683	10.973	10.948		2.9491	22.591	5.3788	5.6918	1.9739	3.1568	2.0147	7.8144		13.048	5.6255	2.7646	1.0531	0.81885	30.021	5.5074	4.8896		1.31	1.2657	1.4497	0.81873	1.1039	1.8875	2.2407	11.669		6.1721	44.843	15.348	10.821	3.5721	79.127	14.938	125.63		2.2306	71.767	0.88911	1.5406
436.673	6.6256	0.15041	9.2336	5.3385	3.3463	1.5692	11.151	11.018		3.0658	23.168	5.4883	5.4528	1.8277	2.967	2.0373	8.0596		13.103	6.3438	2.7672	1.0579	0.86025	30.849	5.3925	4.7509		1.3159	1.2	1.4517	0.84333	1.0983	1.7907	2.1721	11.458		6.3428	46.338	15.025	10.415	3.4189	81.831	14.993	121.78		2.1645	71.49	0.9108	1.5833
437.192	6.3829	0.14917	8.9466	5.745	3.2823	1.57	11.29	11.093		3.1877	23.708	5.5833	5.2087	1.6904	2.7742	2.062	8.2902		13.093	7.123	2.7601	1.065	0.90504	31.701	5.2817	4.6167		1.3213	1.1569	1.4511	0.87193	1.1001	1.6887	2.0995	11.246		6.5314	47.755	14.651	10.02	3.2574	84.474	14.978	117.64		2.0909	71.151	0.93951	1.6366
437.712	6.1229	0.14789	8.6753	6.1844	3.2076	1.5705	11.386	11.168		3.3124	24.187	5.6623	4.9614	1.5627	2.5821	2.0891	8.5045		13.022	7.9515	2.7442	1.0745	0.95314	32.576	5.1772	4.4878		1.3258	1.1353	1.4483	0.90444	1.1093	1.5834	2.0241	11.039		6.7335	49.073	14.236	9.6443	3.0892	87.036	14.895	113.27		2.0117	70.735	0.97469	1.6999
438.231	5.8504	0.14659	8.4216	6.6542	3.1229	1.5706	11.436	11.241		3.4376	24.586	5.7239	4.713	1.4451	2.3943	2.119	8.701		12.892	8.8168	2.7206	1.0866	1.0045	33.47	5.0806	4.3642		1.3292	1.1336	1.4436	0.94073	1.1255	1.4761	1.9472	10.846		6.9444	50.271	13.788	9.2914	2.9162	89.498	14.748	108.72		1.9285	70.226	1.0158	1.7726
438.75	5.5705	0.14531	8.1868	7.1509	3.0293	1.5703	11.439	11.306		3.561	24.889	5.767	4.4655	1.3379	2.2142	2.1524	8.878		12.709	9.7058	2.6908	1.1017	1.0589	34.377	4.9934	4.2462		1.3311	1.1499	1.4375	0.98059	1.1484	1.3687	1.87	10.671		7.1593	51.326	13.319	8.9663	2.7407	91.841	14.542	104.04		1.8432	69.612	1.0621	1.8535
439.269	5.2886	0.14405	7.9719	7.6702	2.9279	1.5695	11.393	11.361		3.6803	25.081	5.7907	4.2214	1.2415	2.045	2.1898	9.0337		12.477	10.605	2.6564	1.1199	1.1164	35.286	4.917	4.1338		1.3312	1.1821	1.4304	1.0238	1.1776	1.2628	1.7939	10.521		7.3736	52.217	12.842	8.6734	2.5648	94.041	14.287	99.274		1.7576	68.878	1.1131	1.9415
439.788	5.0099	0.14283	7.7778	8.2068	2.8202	1.5681	11.297	11.401		3.7935	25.155	5.7943	3.9831	1.1558	1.8897	2.232	9.1663		12.204	11.499	2.6191	1.1417	1.1767	36.185	4.8519	4.0266		1.3293	1.2279	1.4226	1.0699	1.2127	1.1601	1.7201	10.4		7.5825	52.923	12.368	8.417	2.3907	96.079	13.99	94.466		1.6737	68.015	1.1683	2.0355
440.308	4.7396	0.14167	7.6048	8.7549	2.7076	1.5661	11.152	11.424		3.8986	25.104	5.7774	3.7529	1.081	1.7506	2.2797	9.274		11.895	12.376	2.5808	1.1676	1.2397	37.059	4.7988	3.9244		1.3251	1.2851	1.4145	1.1187	1.2531	1.0621	1.6499	10.312		7.7817	53.426	11.909	8.2008	2.2207	97.931	13.662	89.66		1.5931	67.014	1.2269	2.1339
440.827	4.4827	0.14058	7.4531	9.3078	2.5916	1.5635	10.959	11.425		3.9939	24.927	5.7396	3.5335	1.0169	1.6299	2.3337	9.3552		11.557	13.221	2.5431	1.1979	1.3051	37.89	4.7577	3.8267		1.3185	1.3513	1.4065	1.1695	1.2983	0.97049	1.5844	10.258		7.967	53.711	11.476	8.0284	2.0568	99.577	13.314	84.896		1.5174	65.875	1.2884	2.2354
441.346	4.2439	0.13958	7.3227	9.858	2.4737	1.5604	10.719	11.402		4.0779	24.624	5.6813	3.3274	0.96344	1.5292	2.3947	9.4081		11.197	14.02	2.5079	1.2329	1.3728	38.659	4.7284	3.7332		1.3093	1.4242	1.3989	1.2218	1.3479	0.88669	1.5247	10.239		8.1349	53.765	11.081	7.9028	1.9008	101	12.957	80.208		1.4482	64.599	1.3522	2.3385
441.865	4.0272	0.13866	7.2133	10.398	2.3555	1.5568	10.436	11.354		4.1495	24.2	5.6026	3.1369	0.92013	1.4497	2.4636	9.4315		10.823	14.762	2.4765	1.2731	1.4424	39.343	4.7103	3.6433		1.2976	1.5018	1.3918	1.2748	1.4012	0.81208	1.4716	10.253		8.2821	53.581	10.733	7.827	1.7545	102.18	12.601	75.63		1.3869	63.193	1.4176	2.4415
442.385	3.8363	0.13783	7.1249	10.919	2.2385	1.5527	10.112	11.277		4.2075	23.663	5.5042	2.9645	0.88661	1.392	2.5408	9.4244		10.44	15.434	2.4505	1.3186	1.5135	39.923	4.7026	3.5566		1.2832	1.582	1.3855	1.3279	1.4578	0.74788	1.4257	10.298		8.4061	53.156	10.439	7.8031	1.6193	103.11	12.258	71.189		1.3344	61.67	1.484	2.543
442.904	3.6743	0.13709	7.0569	11.412	2.1242	1.5484	9.7525	11.171		4.2512	23.02	5.3871	2.8122	0.86233	1.3564	2.6268	9.386		10.055	16.026	2.4308	1.3696	1.5857	40.374	4.7042	3.4728		1.2663	1.6629	1.3801	1.3802	1.5172	0.6952	1.3876	10.37		8.5051	52.49	10.207	7.8331	1.4963	103.78	11.937	66.911		1.2918	60.049	1.5508	2.6416
443.423	3.5435	0.13645	7.0093	11.87	2.0139	1.5438	9.3611	11.036		4.28	22.284	5.2524	2.682	0.84668	1.3426	2.7218	9.3163		9.6739	16.529	2.4184	1.4262	1.6585	40.677	4.7139	3.3916		1.2469	1.7429	1.3756	1.4307	1.5788	0.65499	1.3576	10.463		8.5778	51.59	10.04	7.9184	1.3863	104.19	11.646	62.815		1.2598	58.353	1.6173	2.7359
443.942	3.4457	0.13591	6.9815	12.284	1.9088	1.5393	8.9435	10.871		4.2937	21.468	5.1016	2.5756	0.83894	1.3499	2.8259	9.2153		9.3024	16.937	2.4136	1.4882	1.7314	40.813	4.7303	3.3129		1.2252	1.8205	1.3721	1.4786	1.6422	0.62799	1.3357	10.572		8.6235	50.467	9.9423	8.0599	1.2899	104.35	11.392	58.919		1.2388	56.607	1.6829	2.8247
444.462	3.3819	0.13545	6.9733	12.646	1.8101	1.5349	8.5052	10.677		4.2922	20.586	4.9363	2.4942	0.83835	1.3771	2.9387	9.0838		8.9451	17.242	2.4168	1.5555	1.8037	40.764	4.7519	3.2365		1.2014	1.8944	1.3696	1.523	1.7066	0.61481	1.3218	10.69		8.6424	49.136	9.9149	8.2581	1.2073	104.25	11.182	55.236		1.2289	54.842	1.7468	2.907
444.981	3.3525	0.13509	6.9841	12.95	1.7188	1.5308	8.0522	10.456		4.2754	19.654	4.7585	2.4389	0.84407	1.4226	3.0596	8.9231		8.6066	17.443	2.4276	1.6275	1.8748	40.519	4.7771	3.1627		1.1757	1.9634	1.3679	1.5628	1.7717	0.61583	1.3155	10.811		8.6354	47.618	9.9577	8.5129	1.1384	103.91	11.019	51.775		1.2303	53.089	1.8084	2.9819
445.5	3.3573	0.1348	7.0135	13.189	1.6358	1.5272	7.5907	10.211		4.2438	18.687	4.5702	2.4102	0.85519	1.4846	3.1876	8.7347		8.2908	17.537	2.4456	1.7037	1.9439	40.068	4.8044	3.0917		1.1483	2.0267	1.367	1.5973	1.8367	0.63126	1.3163	10.927		8.6037	45.934	10.069	8.824	1.0831	103.35	10.906	48.544		1.2426	51.38	1.8669	3.0487
446.019	3.3951	0.1346	7.0606	13.358	1.5617	1.5244	7.1267	9.9435		4.1978	17.703	4.3738	2.4081	0.87079	1.5609	3.3212	8.5207		8.0008	17.524	2.47	1.7835	2.0105	39.408	4.8325	3.0239		1.1197	2.0833	1.3667	1.6256	1.901	0.6611	1.3236	11.034		8.5493	44.112	10.247	9.1906	1.0407	102.58	10.844	45.546		1.2654	49.749	1.9217	3.1068
446.538	3.4645	0.13446	7.1245	13.455	1.4972	1.5224	6.6664	9.6585		4.138	16.719	4.1716	2.4324	0.88991	1.6491	3.4588	8.2836		7.7395	17.408	2.4997	1.8659	2.0737	38.54	4.8599	2.9598		1.0899	2.1327	1.367	1.647	1.9638	0.70516	1.3365	11.125		8.4745	42.179	10.487	9.6115	1.0105	101.63	10.833	42.787		1.298	48.224	1.9721	3.1557
447.058	3.5633	0.13438	7.2039	13.476	1.4427	1.5214	6.2156	9.3601		4.0654	15.751	3.9663	2.4822	0.91159	1.7468	3.5982	8.0261		7.5089	17.192	2.5332	1.9501	2.1328	37.472	4.8855	2.9001		1.0595	2.1743	1.3678	1.6608	2.0244	0.76305	1.354	11.198		8.3821	40.163	10.786	10.085	0.99168	100.52	10.871	40.267		1.3396	46.834	2.0174	3.1952
447.577	3.6889	0.13436	7.2974	13.422	1.3984	1.5215	5.7797	9.0529		3.9808	14.817	3.7603	2.5562	0.93486	1.8512	3.7371	7.7512		7.3106	16.883	2.5692	2.035	2.1871	36.213	4.9081	2.8456		1.0288	2.2076	1.3689	1.6668	2.082	0.83419	1.3752	11.249		8.2751	38.095	11.139	10.61	0.98311	99.278	10.955	37.99		1.3891	45.602	2.057	3.225
448.096	3.8382	0.13438	7.403	13.294	1.3643	1.523	5.3636	8.7419		3.8855	13.934	3.5562	2.6528	0.95878	1.9596	3.8728	7.4618		7.1456	16.488	2.6059	2.1195	2.236	34.781	4.9268	2.7973		0.99807	2.2326	1.3703	1.6645	2.1356	0.91783	1.399	11.278		8.1566	36.002	11.541	11.184	0.98369	97.916	11.08	35.959		1.4454	44.548	2.0905	3.2449
448.615	4.0078	0.13443	7.5188	13.094	1.3405	1.5258	4.9718	8.4323		3.7808	13.116	3.3564	2.7697	0.98245	2.0696	4.0026	7.1612		7.0142	16.016	2.6416	2.2026	2.2788	33.195	4.9411	2.7561		0.96772	2.2489	1.372	1.6538	2.1846	1.013	1.4243	11.285		8.0298	33.913	11.988	11.804	0.99225	96.457	11.24	34.178		1.5075	43.686	2.1173	3.2549
449.135	4.194	0.1345	7.6425	12.827	1.3265	1.5299	4.6081	8.1291		3.668	12.381	3.1633	2.9043	1.005	2.1784	4.1236	6.8524		6.9162	15.478	2.6745	2.2831	2.3151	31.479	4.9503	2.723		0.93808	2.2566	1.3739	1.6349	2.2279	1.1187	1.4502	11.271		7.898	31.852	12.475	12.467	1.0076	94.922	11.43	32.655		1.5739	43.025	2.137	3.255
449.654	4.393	0.13459	7.7716	12.499	1.322	1.5354	4.2756	7.8373		3.5487	11.74	2.9791	3.0537	1.0257	2.2838	4.2329	6.5383		6.8508	14.885	2.703	2.36	2.3444	29.656	4.9543	2.6991		0.9095	2.256	1.376	1.6081	2.2648	1.2336	1.4755	11.241		7.7639	29.843	12.998	13.171	1.0286	93.327	11.643	31.398		1.6434	42.569	2.1494	3.2452
450.173	4.6008	0.13468	7.9037	12.117	1.3265	1.5422	3.9767	7.5612		3.4246	11.209	2.8057	3.2147	1.0438	2.3835	4.3278	6.2217		6.8166	14.249	2.7255	2.4323	2.3664	27.756	4.9528	2.6855		0.88229	2.2472	1.3781	1.5736	2.2945	1.3564	1.4995	11.198		7.6305	27.906	13.555	13.911	1.054	91.685	11.871	30.418		1.7147	42.316	2.1542	3.2255
450.692	4.8134	0.13476	8.0363	11.689	1.3393	1.5503	3.7131	7.305		3.2973	10.799	2.645	3.3836	1.0587	2.4756	4.4059	5.9051		6.8117	13.581	2.7406	2.4992	2.3809	25.805	4.9459	2.683		0.85675	2.2306	1.3804	1.5322	2.3165	1.4854	1.5214	11.149		7.5001	26.058	14.141	14.683	1.083	90.009	12.106	29.732		1.7865	42.258	2.1515	3.196
451.212	5.0268	0.13484	8.167	11.226	1.3597	1.5595	3.4858	7.0721		3.1686	10.519	2.4983	3.5566	1.0699	2.5583	4.4648	5.5908		6.8336	12.893	2.7469	2.5599	2.3879	23.833	4.9338	2.6925		0.83314	2.2068	1.3828	1.4846	2.3302	1.6193	1.5405	11.097		7.3748	24.312	14.754	15.483	1.1145	88.31	12.341	29.356		1.8578	42.383	2.1414	3.1568
451.731	5.2374	0.13489	8.2936	10.738	1.3867	1.5697	3.295	6.8651		3.0402	10.379	2.3668	3.73	1.077	2.6302	4.5028	5.2808		6.8794	12.198	2.7434	2.6138	2.3872	21.865	4.9167	2.7147		0.81168	2.1764	1.3852	1.4315	2.3352	1.7561	1.5564	11.051		7.2563	22.68	15.392	16.304	1.1478	86.598	12.568	29.311		1.9273	42.676	2.1239	3.1083
452.25	5.4414	0.13491	8.4144	10.234	1.4195	1.5807	3.1404	6.6861		2.9139	10.385	2.2512	3.8995	1.0798	2.6903	4.5186	4.9767		6.9459	11.506	2.7295	2.6605	2.3793	19.928	4.8949	2.7503		0.79255	2.1401	1.3876	1.3741	2.3313	1.8943	1.5686	11.015		7.1457	21.17	16.053	17.14	1.1824	84.881	12.78	29.617		1.994	43.116	2.0993	3.0505
452.769	5.6355	0.13491	8.5277	9.7249	1.4572	1.5922	3.021	6.5363		2.7915	10.541	2.1522	4.0613	1.078	2.7377	4.5114	4.6802		7.0292	10.828	2.7045	2.6997	2.3642	18.048	4.8688	2.7995		0.7759	2.0986	1.3899	1.3134	2.3186	2.032	1.5769	10.995		7.0438	19.786	16.736	17.985	1.2179	83.168	12.971	30.298		2.057	43.682	2.0681	2.9839
453.288	5.8165	0.13487	8.6323	9.2215	1.4988	1.604	2.9354	6.4162		2.6746	10.849	2.0697	4.2113	1.0718	2.7719	4.4809	4.3926		7.1254	10.174	2.6684	2.7314	2.3425	16.246	4.8389	2.8626		0.76181	2.0529	1.392	1.2504	2.2972	2.1674	1.5813	10.996		6.9511	18.531	17.439	18.832	1.2542	81.465	13.133	31.376		2.1155	44.348	2.0307	2.9088
453.808	5.9815	0.1348	8.7273	8.733	1.5435	1.6159	2.8816	6.3257		2.5649	11.31	2.0037	4.3459	1.0613	2.7926	4.4274	4.1151		7.2304	9.551	2.621	2.7555	2.3146	14.543	4.8056	2.9394		0.75032	2.0038	1.3938	1.1864	2.2676	2.2988	1.5818	11.022		6.8673	17.405	18.163	19.671	1.2913	79.781	13.262	32.872		2.1688	45.089	1.9877	2.826
454.327	6.1278	0.13468	8.8123	8.268	1.5903	1.6276	2.8573	6.2637		2.4637	11.922	1.9536	4.4617	1.0466	2.8	4.3517	3.8491		7.34	8.9674	2.5629	2.7724	2.2811	12.956	4.7694	3.0296		0.74144	1.9522	1.3953	1.1226	2.2303	2.4246	1.5786	11.074		6.7919	16.409	18.907	20.496	1.3297	78.125	13.352	34.804		2.2164	45.88	1.9396	2.7358
454.846	6.2533	0.13452	8.8871	7.8342	1.6386	1.6388	2.8601	6.2288		2.3725	12.679	1.9187	4.5554	1.0282	2.7943	4.2552	3.5957		7.4497	8.4291	2.4945	2.7823	2.2427	11.502	4.7308	3.1329		0.73512	1.899	1.3964	1.06	2.186	2.543	1.572	11.155		6.7242	15.539	19.67	21.296	1.3698	76.504	13.4	37.184		2.2577	46.695	1.8872	2.6392
455.365	6.3559	0.13432	8.9519	7.4379	1.6876	1.6493	2.8871	6.2191		2.2924	13.575	1.898	4.6245	1.0066	2.776	4.1396	3.356		7.5555	7.9411	2.4168	2.7858	2.2	10.192	4.6902	3.2484		0.73127	1.8451	1.3971	1	2.1357	2.6528	1.5621	11.264		6.6627	14.792	20.452	22.064	1.4126	74.927	13.402	40.02		2.2925	47.509	1.8314	2.5368
455.885	6.4339	0.13408	9.0071	7.084	1.7367	1.6587	2.9355	6.2322		2.2243	14.601	1.8903	4.667	0.98239	2.746	4.007	3.1316		7.6534	7.507	2.3307	2.7834	2.1537	9.0365	4.6482	3.3753		0.72976	1.7911	1.3972	0.94353	2.0803	2.7526	1.5495	11.4		6.6062	14.166	21.255	22.791	1.459	73.403	13.357	43.31		2.3207	48.302	1.7728	2.4298
456.404	6.4859	0.13379	9.0536	6.7761	1.7856	1.6669	3.0023	6.2654		2.1689	15.744	1.8941	4.6813	0.95628	2.7051	3.8598	2.9236		7.7396	7.1294	2.2376	2.7756	2.1045	8.0442	4.6051	3.5125		0.73044	1.7379	1.3969	0.89167	2.0208	2.8413	1.5345	11.56		6.5528	13.656	22.077	23.469	1.5102	71.943	13.264	47.046		2.3423	49.054	1.7126	2.319
456.923	6.511	0.13345	9.0922	6.5163	1.8338	1.6736	3.0848	6.3161		2.1267	16.992	1.908	4.6668	0.92902	2.6544	3.7007	2.7337		7.8107	6.8099	2.1389	2.7632	2.0532	7.2203	4.5615	3.6587		0.73312	1.6861	1.3962	0.84539	1.9586	2.9183	1.5176	11.74		6.5006	13.258	22.919	24.091	1.5675	70.554	13.121	51.205		2.3572	49.748	1.6517	2.2055
457.442	6.5085	0.13308	9.1241	6.3051	1.8812	1.6788	3.18	6.3816		2.0978	18.33	1.9304	4.6232	0.90148	2.5948	3.5324	2.5632		7.8638	6.5491	2.0359	2.7467	2.0002	6.5683	4.5176	3.8126		0.73761	1.6363	1.3951	0.80553	1.8946	2.9827	1.499	11.936		6.4478	12.971	23.782	24.65	1.6323	69.246	12.932	55.756		2.366	50.37	1.5912	2.0906
457.962	6.4782	0.13266	9.1506	6.1421	1.9276	1.6822	3.2855	6.4596		2.0822	19.739	1.9596	4.5514	0.87453	2.5277	3.3578	2.4139		7.8964	6.3468	1.9302	2.7268	1.9462	6.0899	4.4738	3.9728		0.74369	1.5889	1.3938	0.77286	1.83	3.0344	1.4792	12.142		6.3922	12.79	24.664	25.142	1.706	68.03	12.696	60.654		2.3688	50.911	1.5325	1.9754
458.481	6.4203	0.13221	9.1729	6.0252	1.9731	1.6837	3.3986	6.5478		2.0795	21.203	1.994	4.4525	0.84909	2.4542	3.1795	2.2873		7.9066	6.2022	1.8234	2.7042	1.8916	5.785	4.4305	4.1378		0.75114	1.5441	1.3925	0.748	1.7659	3.0732	1.4584	12.352		6.332	12.713	25.567	25.561	1.79	66.914	12.419	65.843		2.3663	51.365	1.4769	1.8611
459	6.3356	0.13172	9.1923	5.9517	2.0177	1.6834	3.5172	6.6446		2.0889	22.702	2.0319	4.3288	0.82609	2.3754	3.0004	2.185		7.893	6.1139	1.7171	2.6793	1.8367	5.6519	4.388	4.3061		0.75974	1.5023	1.3915	0.73148	1.7033	3.0994	1.437	12.561		6.2653	12.737	26.49	25.905	1.8855	65.904	12.104	71.255		2.3591	51.729	1.4258	1.7489
459.519	6.2252	0.1312	9.21	5.9179	2.0617	1.6811	3.6393	6.7489		2.1097	24.215	2.0719	4.1828	0.80645	2.2924	2.8229	2.1086		7.8549	6.0802	1.6126	2.6528	1.782	5.6877	4.3466	4.4762		0.76928	1.4636	1.3909	0.72367	1.643	3.1134	1.4151	12.764		6.1904	12.862	27.431	26.173	1.9937	65.008	11.756	76.809		2.3479	52.002	1.3809	1.6401
460.038	6.0908	0.13065	9.2268	5.9194	2.1052	1.6769	3.7631	6.8601		2.1405	25.722	2.1124	4.0178	0.79107	2.2064	2.6496	2.0595		7.7921	6.0991	1.5114	2.6253	1.7276	5.8881	4.3068	4.6468		0.77955	1.4279	1.3912	0.72482	1.5859	3.1158	1.3928	12.956		6.1059	13.084	28.391	26.367	2.1155	64.229	11.384	82.416		2.3335	52.189	1.3438	1.5356
460.558	5.9346	0.13009	9.2437	5.9517	2.1484	1.671	3.8871	6.9785		2.1801	27.202	2.1523	3.8374	0.78079	2.1183	2.4826	2.0389		7.7051	6.1686	1.4148	2.5971	1.6736	6.2479	4.2689	4.8164		0.79035	1.3951	1.3927	0.73504	1.5327	3.1076	1.3703	13.132		6.0107	13.403	29.369	26.487	2.2516	63.57	10.993	87.976		2.3167	52.294	1.3162	1.4365
461.077	5.7593	0.12951	9.261	6.0099	2.1916	1.6633	4.0103	7.1047		2.2268	28.636	2.1903	3.6457	0.7764	2.0289	2.3237	2.0481		7.5949	6.2865	1.3238	2.5689	1.6201	6.7611	4.2337	4.9839		0.80149	1.3651	1.3958	0.75431	1.4838	3.0898	1.3475	13.29		5.904	13.815	30.361	26.538	2.4023	63.028	10.593	93.385		2.2984	52.325	1.2999	1.3437
461.596	5.568	0.12892	9.2789	6.0891	2.235	1.6541	4.1318	7.2401		2.2789	30.003	2.2257	3.4468	0.7786	1.9391	2.1747	2.0879		7.4634	6.4509	1.2395	2.5409	1.5672	7.4209	4.2017	5.1481		0.81279	1.3376	1.401	0.78248	1.4395	3.0639	1.3245	13.427		5.7854	14.318	31.368	26.525	2.5678	62.601	10.193	98.533		2.2795	52.291	1.2966	1.2581
462.115	5.3641	0.12832	9.2971	6.1847	2.2788	1.6436	4.2508	7.3868		2.3345	31.284	2.2578	3.2451	0.78797	1.8497	2.0369	2.1587		7.3129	6.6599	1.1626	2.5137	1.515	8.2199	4.1737	5.3082		0.8241	1.3123	1.4088	0.81926	1.4003	3.0313	1.301	13.544		5.6549	14.91	32.386	26.454	2.7475	62.281	9.8038	103.31		2.2606	52.2	1.3082	1.1801
462.635	5.1513	0.12773	9.3151	6.2924	2.3231	1.6319	4.3671	7.5472		2.3918	32.462	2.286	3.045	0.805	1.7612	1.9113	2.2608		7.1462	6.912	1.0938	2.4874	1.4633	9.1502	4.1509	5.4632		0.83527	1.2888	1.4194	0.86427	1.366	2.9934	1.277	13.64		5.5129	15.585	33.412	26.335	2.9409	62.059	9.4371	107.61		2.2426	52.063	1.3362	1.1102
463.154	4.9336	0.12716	9.332	6.4084	2.3678	1.6192	4.4807	7.7242		2.4489	33.52	2.31	2.8508	0.83002	1.6743	1.7988	2.394		6.9666	7.2057	1.0334	2.4624	1.4125	10.204	4.1341	5.6125		0.84616	1.2667	1.4334	0.917	1.3368	2.9521	1.2524	13.717		5.3602	16.339	34.443	26.176	3.1467	61.925	9.1047	111.32		2.2259	51.887	1.3822	1.0486
463.673	4.7151	0.1266	9.3469	6.5294	2.4129	1.6058	4.5915	7.9208		2.5039	34.443	2.33	2.6665	0.86322	1.5895	1.6997	2.5577		6.7778	7.5397	0.98164	2.4387	1.3624	11.371	4.1246	5.7553		0.85667	1.2455	1.451	0.97687	1.3123	2.909	1.2271	13.777		5.1982	17.166	35.474	25.989	3.3633	61.863	8.8195	114.36		2.2112	51.68	1.4476	0.99553
464.192	4.4998	0.12608	9.3584	6.6526	2.458	1.592	4.7	8.1403		2.5551	35.219	2.346	2.4958	0.90464	1.5073	1.6143	2.7507		6.5838	7.913	0.93856	2.4167	1.3134	12.644	4.1236	5.8911		0.86668	1.2249	1.4724	1.0432	1.2924	2.8657	1.2008	13.824		5.0284	18.057	36.5	25.783	3.5887	61.861	8.5948	116.63		2.1986	51.447	1.5336	0.95074
464.712	4.2918	0.12559	9.3652	6.7759	2.5029	1.5779	4.8066	8.3859		2.6009	35.836	2.3584	2.3422	0.95419	1.4281	1.5424	2.9714		6.3887	8.3244	0.904	2.3962	1.2656	14.012	4.1323	6.0195		0.8761	1.2044	1.4977	1.1153	1.2767	2.8241	1.1736	13.861		4.8529	19.004	37.514	25.572	3.8205	61.902	8.4447	118.07		2.1884	51.192	1.641	0.91397
465.231	4.0946	0.12515	9.3659	6.8977	2.5471	1.5639	4.9118	8.6605		2.6399	36.286	2.3677	2.2086	1.0116	1.3525	1.4837	3.2178		6.1965	8.7728	0.87764	2.3774	1.2193	15.466	4.1519	6.14		0.88484	1.1836	1.527	1.1924	1.2646	2.7856	1.1453	13.892		4.674	19.998	38.508	25.365	4.0559	61.972	8.3833	118.63		2.1805	50.916	1.7704	0.88479
465.75	3.9119	0.12477	9.3593	7.0172	2.5897	1.5502	5.0165	8.9666		2.6708	36.561	2.3746	2.0975	1.0764	1.2809	1.4377	3.4874		6.0112	9.2571	0.85907	2.36	1.1749	16.995	4.1832	6.2523		0.89283	1.1622	1.5601	1.2738	1.2558	2.7518	1.116	13.921		4.4942	21.026	39.472	25.174	4.2919	62.058	8.4249	118.29		2.175	50.618	1.9223	0.86264
466.269	3.7466	0.12446	9.3445	7.1337	2.6301	1.5369	5.1213	9.3063		2.6927	36.657	2.3799	2.0108	1.148	1.2137	1.4035	3.7771		5.8364	9.7756	0.84773	2.3439	1.1328	18.588	4.2271	6.3562		0.89998	1.1399	1.5967	1.3586	1.2498	2.724	1.0856	13.95		4.3163	22.077	40.397	25.01	4.5251	62.145	8.5838	117.01		2.1715	50.292	2.0965	0.84685
466.788	3.6013	0.12424	9.3206	7.2472	2.6672	1.5244	5.2272	9.6807		2.7049	36.571	2.3845	1.9499	1.2258	1.1514	1.3805	4.0836		5.6756	10.327	0.843	2.3288	1.0934	20.234	4.2841	6.4513		0.9062	1.1166	1.6364	1.4461	1.2459	2.7034	1.0543	13.984		4.143	23.137	41.269	24.882	4.752	62.224	8.8736	114.83		2.1696	49.934	2.2925	0.83666
467.308	3.4781	0.1241	9.2872	7.358	2.7001	1.5127	5.3349	10.09		2.707	36.303	2.3894	1.9157	1.3089	1.0944	1.3676	4.4032		5.5315	10.908	0.84423	2.3145	1.0572	21.921	4.3542	6.5375		0.91142	1.092	1.6786	1.5356	1.2438	2.691	1.0222	14.025		3.9774	24.192	42.075	24.797	4.9691	62.284	9.307	111.78		2.1691	49.534	2.5096	0.83128
467.827	3.3785	0.12407	9.2444	7.4665	2.7277	1.502	5.4452	10.534		2.6988	35.855	2.3954	1.9086	1.3964	1.0431	1.3638	4.7319		5.4064	11.517	0.85072	2.3005	1.0248	23.635	4.4373	6.6146		0.91554	1.0663	1.7226	1.6265	1.243	2.6873	0.98962	14.074		3.8221	25.23	42.8	24.761	5.173	62.317	9.8955	107.91		2.1693	49.082	2.7464	0.82988
468.346	3.3035	0.12415	9.1925	7.5735	2.7487	1.4925	5.5591	11.009		2.6804	35.231	2.4038	1.9283	1.4872	0.99813	1.3682	5.0657		5.3021	12.151	0.86182	2.2863	0.99658	25.364	4.5327	6.6824		0.91847	1.0394	1.7678	1.7182	1.2431	2.6931	0.95677	14.133		3.6799	26.234	43.43	24.779	5.3602	62.318	10.649	103.3		2.1697	48.568	3.0013	0.83162
468.865	3.2533	0.12435	9.132	7.6795	2.7621	1.4842	5.6771	11.514		2.6521	34.44	2.4153	1.9742	1.5803	0.95981	1.3799	5.4004		5.2195	12.805	0.87691	2.2716	0.97316	27.093	4.6393	6.7409		0.92013	1.0115	1.8132	1.8101	1.2438	2.7084	0.92404	14.2		3.5534	27.19	43.95	24.853	5.5278	62.281	11.575	98.055		2.1699	47.978	3.2721	0.83569
469.385	3.2278	0.12469	9.0642	7.7849	2.7667	1.4773	5.8001	12.043		2.6147	33.49	2.4311	2.0453	1.6745	0.92859	1.398	5.7319		5.1592	13.474	0.89542	2.2557	0.95501	28.807	4.7555	6.7898		0.92044	0.98286	1.858	1.9018	1.2451	2.7334	0.89183	14.276		3.4447	28.085	44.343	24.982	5.673	62.202	12.678	92.275		2.1693	47.303	3.5564	0.84132
469.904	3.2261	0.12518	8.9902	7.8903	2.7617	1.4717	5.9285	12.59		2.5688	32.394	2.4518	2.1399	1.7687	0.90486	1.4217	6.0562		5.1208	14.154	0.91688	2.2383	0.94258	30.49	4.8794	6.8294		0.91932	0.9537	1.9011	1.993	1.2467	2.7677	0.86062	14.359		3.3557	28.904	44.597	25.164	5.7934	62.076	13.96	86.087		2.1676	46.532	3.8515	0.84779
470.423	3.2469	0.12581	8.9115	7.9955	2.7461	1.4674	6.0625	13.15		2.5155	31.166	2.4783	2.2563	1.8618	0.88895	1.4506	6.3697		5.1037	14.839	0.94092	2.2186	0.93627	32.126	5.0086	6.8594		0.91671	0.92436	1.9418	2.0832	1.2488	2.8108	0.83094	14.447		3.2881	29.635	44.698	25.397	5.8873	61.9	15.42	79.625		2.1642	45.656	4.154	0.85445
470.942	3.2885	0.12659	8.83	8.1002	2.7196	1.4646	6.2021	13.714		2.4559	29.824	2.5112	2.3924	1.9528	0.88114	1.484	6.669		5.1065	15.519	0.96728	2.1964	0.93637	33.699	5.1405	6.8801		0.91256	0.89519	1.9789	2.1722	1.2515	2.862	0.80334	14.536		3.2429	30.265	44.637	25.675	5.9533	61.67	17.052	73.026		2.159	44.668	4.4608	0.86073
471.462	3.3485	0.12753	8.7473	8.2038	2.6817	1.463	6.347	14.273		2.3911	28.389	2.5507	2.5459	2.0406	0.8816	1.5218	6.9511		5.1276	16.188	0.99579	2.1711	0.94309	35.193	5.2721	6.8917		0.90687	0.86658	2.0117	2.2597	1.2549	2.9204	0.77841	14.624		3.2209	30.783	44.405	25.991	5.9908	61.379	18.847	66.429		2.1517	43.564	4.768	0.86611
471.981	3.4247	0.12862	8.6655	8.3053	2.6327	1.4628	6.4965	14.819		2.3226	26.881	2.5972	2.7143	2.1243	0.89042	1.5638	7.2137		5.1649	16.837	1.0264	2.1425	0.95652	36.591	5.4003	6.8944		0.89963	0.83889	2.0394	2.3454	1.2596	2.9849	0.75679	14.708		3.2223	31.179	43.997	26.338	5.9995	61.023	20.791	59.973		2.1421	42.343	5.0721	0.8702
472.5	3.5141	0.12986	8.5864	8.4033	2.573	1.4638	6.6493	15.342		2.2517	25.324	2.6506	2.8948	2.2032	0.90756	1.6098	7.4547		5.2162	17.456	1.0591	2.1102	0.9766	37.877	5.522	6.8887		0.8909	0.81249	2.0612	2.429	1.2659	3.054	0.7391	14.784		3.2468	31.444	43.412	26.708	5.9798	60.595	22.867	53.792		2.1303	41.005	5.369	0.87268
473.019	3.6139	0.13124	8.5121	8.4961	2.5033	1.4659	6.8038	15.833		2.1795	23.743	2.7106	3.0849	2.2766	0.93285	1.66	7.6728		5.2791	18.033	1.0941	2.0742	1.0032	39.038	5.6341	6.875		0.88073	0.78771	2.0767	2.5101	1.2742	3.1265	0.72599	14.849		3.2938	31.569	42.65	27.093	5.9325	60.087	25.054	48.012		2.1163	39.555	5.6549	0.8733
473.538	3.7211	0.13275	8.4446	8.582	2.425	1.4691	6.958	16.283		2.1073	22.163	2.7768	3.2817	2.3441	0.966	1.7145	7.8671		5.3512	18.56	1.1315	2.0344	1.0358	40.059	5.7337	6.8539		0.86923	0.76486	2.0853	2.5883	1.285	3.2007	0.71811	14.9		3.3621	31.55	41.719	27.484	5.859	59.492	27.327	42.747		2.1002	38.002	5.926	0.87191
474.058	3.8327	0.13438	8.3857	8.6589	2.3396	1.4732	7.1093	16.684		2.0363	20.611	2.8484	3.4824	2.4052	1.0065	1.7734	8.0376		5.4302	19.024	1.1715	1.991	1.0741	40.928	5.8182	6.8263		0.85654	0.7442	2.0868	2.6633	1.2988	3.275	0.71609	14.937		3.4503	31.38	40.625	27.872	5.761	58.802	29.657	38.102		2.0824	36.354	6.1785	0.86845
474.577	3.9458	0.1361	8.3372	8.7251	2.2491	1.4782	7.255	17.029		1.9676	19.111	2.9245	3.6844	2.4599	1.0539	1.8371	8.1843		5.5137	19.415	1.2143	1.9444	1.1175	41.635	5.8852	6.7928		0.84281	0.72594	2.0811	2.7345	1.316	3.3476	0.72052	14.957		3.5565	31.058	39.381	28.25	5.6405	58.013	32.014	34.163		2.0629	34.624	6.4089	0.86291
475.096	4.0577	0.13791	8.3009	8.7787	2.1557	1.484	7.392	17.311		1.9019	17.691	3.0038	3.8848	2.508	1.1072	1.9056	8.3082		5.5998	19.723	1.2601	1.8949	1.1651	42.172	5.933	6.7545		0.82823	0.71024	2.0683	2.8013	1.337	3.4169	0.73195	14.96		3.6785	30.583	38.001	28.611	5.5	57.117	34.364	31.004		2.0422	32.828	6.6138	0.85536
475.615	4.1657	0.13978	8.2782	8.8182	2.0619	1.4904	7.5172	17.528		1.8401	16.373	3.0852	4.0812	2.5497	1.1657	1.979	8.4105		5.6868	19.939	1.309	1.8432	1.216	42.532	5.9601	6.712		0.81302	0.6972	2.0486	2.8633	1.3619	3.4811	0.75091	14.945		3.8138	29.956	36.502	28.948	5.3421	56.113	36.671	28.679		2.0207	30.982	6.7903	0.84593
476.135	4.2676	0.14169	8.2704	8.8424	1.9705	1.4973	7.6272	17.676		1.7828	15.182	3.167	4.2711	2.5854	1.2282	2.0574	8.493		5.7733	20.053	1.3611	1.79	1.2693	42.714	5.9657	6.6665		0.79738	0.68686	2.0224	2.9197	1.391	3.5382	0.77781	14.915		3.9601	29.18	34.9	29.254	5.1696	55.001	38.9	27.225		1.9987	29.104	6.9358	0.83479
476.654	4.3615	0.14361	8.2782	8.8506	1.8843	1.5047	7.719	17.756		1.7305	14.139	3.2477	4.4522	2.6153	1.2935	2.1407	8.5577		5.858	20.059	1.4165	1.7364	1.3239	42.715	5.9494	6.6186		0.78155	0.6792	1.9904	2.97	1.4242	3.5867	0.81301	14.871		4.1144	28.262	33.216	29.524	4.9857	53.784	41.014	26.66		1.9765	27.212	7.0482	0.82215
477.173	4.4457	0.14551	8.3023	8.8423	1.806	1.5123	7.7897	17.768		1.6834	13.265	3.3256	4.6225	2.6402	1.3605	2.2288	8.607		5.9403	19.951	1.475	1.6832	1.3786	42.537	5.9116	6.5693		0.76577	0.67416	1.9532	3.0135	1.4614	3.6249	0.85678	14.815		4.274	27.21	31.469	29.752	4.7934	52.467	42.979	26.984		1.9544	25.327	7.1258	0.80822
477.692	4.5189	0.14739	8.3426	8.8178	1.7384	1.5202	7.8366	17.717		1.6419	12.578	3.3989	4.7801	2.6606	1.4277	2.3212	8.6436		6.0199	19.728	1.5365	1.6317	1.4324	42.186	5.8529	6.5191		0.75027	0.6716	1.9117	3.0497	1.5021	3.6512	0.90925	14.75		4.4363	26.034	29.678	29.934	4.5959	51.063	44.76	28.179		1.9329	23.468	7.1676	0.79323
478.212	4.5803	0.1492	8.3989	8.7775	1.6842	1.5283	7.8577	17.607		1.606	12.093	3.4662	4.9235	2.6772	1.4936	2.4174	8.6702		6.0965	19.389	1.6007	1.583	1.4841	41.669	5.7745	6.4686		0.73528	0.67134	1.8668	3.0782	1.5458	3.6642	0.97045	14.68		4.5984	24.746	27.863	30.067	4.3965	49.584	46.327	30.209		1.9119	21.654	7.173	0.77743
478.731	4.6294	0.15093	8.4702	8.7226	1.6459	1.5363	7.8511	17.447		1.5758	11.823	3.5258	5.0515	2.691	1.557	2.5168	8.6896		6.1706	18.935	1.6673	1.5386	1.5325	40.994	5.6779	6.4182		0.72102	0.67315	1.8194	3.0984	1.592	3.6627	1.0403	14.607		4.7577	23.362	26.042	30.147	4.1985	48.05	47.652	33.023		1.8918	19.905	7.142	0.76104
479.25	4.6661	0.15255	8.5552	8.6542	1.6257	1.5444	7.8157	17.245		1.5511	11.778	3.5762	5.1632	2.7027	1.6163	2.6187	8.7045		6.2426	18.371	1.7357	1.4996	1.5767	40.174	5.5653	6.3682		0.70771	0.67676	1.7706	3.1101	1.6396	3.6457	1.1185	14.536		4.9118	21.896	24.233	30.172	4.0048	46.483	48.711	36.552		1.8723	18.238	7.0752	0.74426
479.769	4.6905	0.15405	8.6521	8.5741	1.6252	1.5523	7.7508	17.011		1.532	11.967	3.6164	5.258	2.7131	1.6703	2.7219	8.7175		6.3131	17.704	1.8054	1.4675	1.6157	39.221	5.4389	6.3186		0.69554	0.68187	1.7215	3.1133	1.6879	3.6126	1.2046	14.468		5.0582	20.367	22.45	30.141	3.8185	44.906	49.484	40.717		1.8536	16.67	6.9735	0.72727
480.288	4.7034	0.1554	8.7588	8.484	1.6461	1.56	7.6564	16.758		1.5182	12.393	3.6453	5.3358	2.7233	1.7177	2.8257	8.7308		6.3829	16.943	1.8757	1.4434	1.6488	38.153	5.3013	6.2694		0.6847	0.68814	1.6729	3.1078	1.7357	3.5629	1.2981	14.407		5.1949	18.792	20.708	30.053	3.6423	43.348	49.957	45.424		1.8354	15.217	6.8385	0.71024
480.808	4.7055	0.15658	8.8728	8.3858	1.6893	1.5675	7.5328	16.496		1.5097	13.058	3.6622	5.3966	2.7338	1.7573	2.9286	8.7463		6.453	16.101	1.9457	1.4286	1.6753	36.985	5.1551	6.2205		0.67534	0.69522	1.6258	3.0938	1.7819	3.4966	1.3983	14.355		5.32	17.19	19.02	29.911	3.4787	41.838	50.121	50.572		1.8174	13.892	6.6721	0.6933
481.327	4.6983	0.15758	8.9914	8.2812	1.7553	1.5747	7.3812	16.24		1.5063	13.96	3.6668	5.441	2.7455	1.7884	3.0296	8.7654		6.5243	15.191	2.0147	1.424	1.6947	35.735	5.0032	6.1715		0.66762	0.70276	1.581	3.0716	1.8253	3.4137	1.5042	14.313		5.4317	15.579	17.397	29.718	3.3298	40.406	49.973	56.05		1.7993	12.706	6.4768	0.67657
481.846	4.6832	0.15839	9.1116	8.1719	1.8441	1.5815	7.2029	16.001		1.5081	15.094	3.6591	5.4698	2.759	1.8102	3.1274	8.7889		6.5974	14.228	2.0818	1.4306	1.7067	34.422	4.8482	6.1222		0.66166	0.71037	1.5393	3.0417	1.8647	3.315	1.6149	14.281		5.5286	13.979	15.847	29.476	3.1975	39.083	49.515	61.744		1.7807	11.669	6.2552	0.66014
482.365	4.662	0.15901	9.2306	8.0592	1.9552	1.588	6.9997	15.791		1.515	16.452	3.6393	5.4843	2.7746	1.8224	3.2205	8.8171		6.673	13.228	2.1459	1.449	1.7113	33.065	4.6928	6.0721		0.65756	0.71771	1.5012	3.0046	1.8992	3.2012	1.729	14.26		5.6095	12.408	14.379	29.193	3.0831	37.898	48.755	67.534		1.7611	10.788	6.0103	0.6441
482.885	4.6367	0.15944	9.3454	7.9441	2.0876	1.594	6.7739	15.623		1.5271	18.023	3.6082	5.4857	2.7927	1.8247	3.3078	8.8497		6.7519	12.208	2.2062	1.4797	1.7083	31.685	4.5396	6.0209		0.65542	0.72443	1.4672	2.961	1.9276	3.0736	1.8453	14.248		5.6734	10.882	12.998	28.874	2.9875	36.88	47.707	73.301		1.7403	10.067	5.7453	0.62854
483.404	4.6094	0.15967	9.453	7.8275	2.2398	1.5997	6.5279	15.506		1.5445	19.793	3.5668	5.4757	2.8134	1.8173	3.3878	8.8857		6.8342	11.185	2.2616	1.5229	1.6982	30.301	4.3907	5.9678		0.65528	0.73021	1.4375	2.9116	1.9491	2.9335	1.9624	14.243		5.7196	9.4186	11.709	28.528	2.9112	36.055	46.387	78.926		1.7177	9.5088	5.4636	0.61355
483.923	4.5821	0.15971	9.5508	7.7095	2.4096	1.6049	6.2646	15.45		1.5675	21.746	3.5164	5.4562	2.8365	1.8006	3.4594	8.9236		6.9202	10.176	2.3113	1.5785	1.6812	28.932	4.2481	5.9126		0.65719	0.73475	1.4125	2.8573	1.9629	2.7826	2.0787	14.244		5.7478	8.0314	10.515	28.162	2.8541	35.446	44.819	84.297		1.6929	9.113	5.1686	0.59923
484.442	4.5569	0.15959	9.6362	7.5902	2.5947	1.6097	5.9869	15.46		1.5963	23.863	3.4587	5.429	2.8617	1.7754	3.5213	8.9615		7.0098	9.1955	2.3543	1.6462	1.6578	27.598	4.1136	5.8546		0.66114	0.73781	1.3922	2.7988	1.9685	2.6227	2.1927	14.248		5.7577	6.7339	9.4198	27.785	2.8157	35.073	43.029	89.304		1.6658	8.8764	4.8641	0.58573
484.962	4.536	0.15932	9.7069	7.4691	2.792	1.6141	5.6981	15.542		1.6312	26.122	3.3956	5.3961	2.8885	1.7425	3.5726	8.997		7.1028	8.2593	2.3899	1.7253	1.6287	26.317	3.9885	5.7933		0.66711	0.73919	1.3764	2.7372	1.9656	2.4557	2.3027	14.251		5.7494	5.537	8.423	27.404	2.795	34.95	41.046	93.847		1.636	8.7935	4.5536	0.5732
485.481	4.5212	0.15893	9.761	7.3456	2.9984	1.618	5.4013	15.698		1.6727	28.5	3.3291	5.3593	2.9163	1.7031	3.6122	9.0273		7.1988	7.3802	2.4173	1.8148	1.5946	25.106	3.8739	5.7283		0.67503	0.73874	1.3651	2.6734	1.954	2.2837	2.4073	14.251		5.7234	4.4502	7.5253	27.028	2.7908	35.089	38.904	97.838		1.6033	8.8562	4.2406	0.56187
486	4.5141	0.15843	9.7968	7.2187	3.2103	1.6216	5.1	15.927		1.7211	30.971	3.2615	5.3205	2.944	1.6587	3.6393	9.0494		7.2971	6.5697	2.4361	1.9134	1.5563	23.983	3.7704	5.6593		0.68482	0.73636	1.3578	2.6083	1.9337	2.1087	2.5048	14.244		5.6802	3.4806	6.7258	26.664	2.8013	35.496	36.634	101.2		1.5677	9.0544	3.9287	0.552
486.519	4.5162	0.15786	9.8133	7.0872	3.4242	1.6248	4.7975	16.229		1.7768	33.509	3.1951	5.2813	2.9708	1.6107	3.6535	9.0605		7.3969	5.8371	2.4457	2.0197	1.5145	22.961	3.6785	5.5858		0.69632	0.73204	1.3541	2.5428	1.9051	1.9328	2.5937	14.228		5.6207	2.6337	6.0227	26.315	2.8246	36.172	34.274	103.87		1.5293	9.3757	3.6211	0.5439
487.038	4.5284	0.15725	9.8099	6.9502	3.6362	1.6277	4.4972	16.596		1.8401	36.085	3.1321	5.2433	2.9954	1.5608	3.6543	9.0574		7.4973	5.1897	2.4459	2.1319	1.4702	22.054	3.5985	5.5077		0.70939	0.72581	1.3537	2.4778	1.8687	1.758	2.6728	14.2		5.546	1.9126	5.4134	25.988	2.8586	37.112	31.859	105.8		1.488	9.8059	3.3209	0.53795
487.558	4.5514	0.15662	9.7862	6.8064	3.8426	1.6302	4.2024	17.021		1.9113	38.671	3.0746	5.2078	3.0166	1.5107	3.6416	9.0375		7.5972	4.6327	2.4365	2.2478	1.4241	21.272	3.5302	5.4251		0.7238	0.71778	1.3558	2.4141	1.825	1.5862	2.7409	14.161		5.4574	1.3186	4.8944	25.684	2.901	38.309	29.424	106.97		1.444	10.329	3.0311	0.53459
488.077	4.5855	0.15601	9.7428	6.655	4.0399	1.6325	3.9163	17.495		1.9906	41.239	3.0247	5.1756	3.0333	1.462	3.6155	8.9985		7.6955	4.1688	2.4178	2.3654	1.3771	20.623	3.4735	5.338		0.73935	0.70812	1.36	2.3526	1.775	1.4193	2.7968	14.108		5.3565	0.8511	4.4612	25.405	2.9496	39.749	27.005	107.37		1.3977	10.929	2.7541	0.53429
488.596	4.6307	0.15544	9.6807	6.4952	4.2247	1.6345	3.6419	18.006		2.078	43.758	2.9842	5.1478	3.0443	1.4165	3.5765	8.9382		7.7908	3.7987	2.3897	2.4823	1.3299	20.113	3.4282	5.2467		0.75579	0.69702	1.3656	2.2939	1.7194	1.259	2.8398	14.043		5.2449	0.50784	4.1088	25.152	3.0022	41.413	24.633	107		1.3493	11.586	2.4922	0.53757
489.115	4.6863	0.15493	9.6015	6.3265	4.394	1.6363	3.3823	18.538		2.1733	46.201	2.9545	5.1247	3.0483	1.3755	3.5251	8.8553		7.882	3.5211	2.3527	2.5962	1.2833	19.743	3.3938	5.1517		0.77286	0.68478	1.3719	2.2387	1.6593	1.1068	2.8693	13.966		5.1246	0.2848	3.8313	24.923	3.0569	43.279	22.339	105.89		1.2992	12.283	2.2474	0.54499
489.635	4.7515	0.15451	9.5072	6.149	4.5451	1.6378	3.1399	19.078		2.2763	48.542	2.937	5.1066	3.0443	1.3406	3.4622	8.7489		7.9679	3.3327	2.3074	2.7047	1.2379	19.514	3.3699	5.0538		0.79031	0.67167	1.3784	2.1873	1.5957	0.96405	2.8849	13.881		4.9976	0.17648	3.6222	24.716	3.1118	45.323	20.152	104.09		1.2478	13.001	2.0213	0.55712
490.154	4.8252	0.15418	9.4004	5.9629	4.676	1.6392	2.9173	19.61		2.3863	50.754	2.9325	5.0935	3.0314	1.313	3.3889	8.6189		8.0475	3.2283	2.2544	2.8055	1.1943	19.421	3.3563	4.9539		0.80788	0.65805	1.3845	2.1402	1.5297	0.83209	2.8865	13.789		4.866	0.17608	3.4742	24.529	3.1656	47.515	18.094	101.67		1.1955	13.721	1.8152	0.57451
490.673	4.9057	0.15394	9.2843	5.7688	4.7851	1.6403	2.7167	20.115		2.5026	52.814	2.9414	5.0849	3.0089	1.2936	3.3066	8.4654		8.1199	3.2015	2.1944	2.8966	1.1531	19.457	3.3525	4.8529		0.82533	0.64425	1.3896	2.0974	1.4623	0.71193	2.8743	13.693		4.732	0.27566	3.3796	24.359	3.217	49.827	16.187	98.691		1.1429	14.426	1.6301	0.59772
491.192	4.9914	0.15382	9.1621	5.5677	4.8714	1.6413	2.5398	20.578		2.6242	54.702	2.9641	5.0803	2.9762	1.2832	3.2166	8.2897		8.1844	3.2446	2.1285	2.9759	1.1147	19.613	3.358	4.7522		0.84247	0.63062	1.3933	2.0591	1.3945	0.60449	2.8487	13.599		4.5978	0.46628	3.3303	24.201	3.2655	52.227	14.446	95.261		1.0904	15.099	1.4666	0.62723
491.712	5.0802	0.15378	9.0374	5.3611	4.9345	1.6421	2.3883	20.983		2.7499	56.401	3.0002	5.0789	2.933	1.2824	3.1207	8.0931		8.2407	3.3488	2.0576	3.0417	1.0795	19.875	3.3728	4.653		0.85909	0.61752	1.3954	2.025	1.3273	0.51051	2.8103	13.508		4.4656	0.73825	3.3176	24.052	3.3105	54.684	12.884	91.479		1.0386	15.726	1.3251	0.66349
492.231	5.17	0.15384	8.914	5.1506	4.9746	1.6427	2.2634	21.313		2.8782	57.894	3.0494	5.0796	2.8791	1.2913	3.0205	7.8779		8.2886	3.5047	1.983	3.0927	1.0477	20.227	3.3963	4.5567		0.87505	0.60527	1.3956	1.9949	1.2614	0.43058	2.7601	13.425		4.3374	1.0812	3.3326	23.908	3.3522	57.167	11.506	87.456		0.98799	16.293	1.2057	0.70688
492.75	5.2587	0.15396	8.7953	4.9379	4.9927	1.6432	2.1658	21.555		3.0075	59.171	3.1108	5.0812	2.8147	1.31	2.918	7.6466		8.3284	3.7025	1.9058	3.1278	1.0197	20.652	3.4283	4.4646		0.89024	0.59418	1.3938	1.9684	1.1977	0.36515	2.6992	13.354		4.2153	1.4845	3.3664	23.764	3.3908	59.648	10.317	83.308		0.939	16.788	1.108	0.75765
493.269	5.3441	0.15414	8.685	4.7251	4.99	1.6435	2.0961	21.695		3.1362	60.223	3.1834	5.0826	2.7402	1.3381	2.815	7.4022		8.3607	3.9323	1.8274	3.1462	0.99548	21.129	3.4686	4.3781		0.90458	0.58451	1.3901	1.945	1.1366	0.31455	2.6289	13.296		4.101	1.9371	3.41	23.618	3.427	62.098	9.3153	79.153		0.89212	17.204	1.0316	0.81601
493.788	5.4238	0.15434	8.5862	4.5142	4.9684	1.6437	2.0543	21.725		3.2622	61.045	3.2659	5.0824	2.6562	1.3751	2.7135	7.1479		8.3864	4.1842	1.7491	3.1478	0.9752	21.636	3.5168	4.2985		0.91803	0.57647	1.3848	1.9238	1.0788	0.27899	2.5505	13.253		3.996	2.428	3.4544	23.464	3.4616	64.493	8.4962	75.105		0.84782	17.534	0.9757	0.88201
494.308	5.4958	0.15454	8.5017	4.3073	4.9303	1.6437	2.0401	21.637		3.3838	61.635	3.3568	5.0794	2.5635	1.4202	2.6155	6.8872		8.4066	4.4487	1.6724	3.1326	0.95885	22.152	3.5727	4.2269		0.93058	0.57025	1.378	1.9044	1.0247	0.25858	2.4657	13.226		3.9017	2.9462	3.4912	23.299	3.4956	66.81	7.8517	71.273		0.80649	17.774	0.93929	0.95564
494.827	5.5582	0.15471	8.434	4.1064	4.8784	1.6437	2.053	21.426		3.4988	61.993	3.4547	5.0722	2.4633	1.4724	2.523	6.6238		8.4227	4.7168	1.5987	3.101	0.94641	22.652	3.636	4.1641		0.94227	0.56596	1.3703	1.8858	0.97442	0.25331	2.376	13.216		3.819	3.4811	3.5121	23.119	3.5303	69.03	7.3711	67.758		0.7685	17.924	0.92113	1.0367
495.346	5.6091	0.15482	8.3851	3.9134	4.8155	1.6435	2.092	21.089		3.6055	62.121	3.5578	5.0599	2.3568	1.5304	2.4379	6.3613		8.4364	4.9802	1.5295	3.054	0.93781	23.114	3.7063	4.1109		0.95315	0.56366	1.3622	1.8673	0.92826	0.26311	2.2832	13.221		3.7485	4.0222	3.5098	22.922	3.5666	71.137	7.0411	64.649		0.73418	17.985	0.91977	1.1251
495.865	5.6469	0.15484	8.3564	3.7302	4.745	1.6433	2.1558	20.629		3.702	62.025	3.6645	5.0416	2.2454	1.593	2.362	6.1033		8.4492	5.2312	1.4661	2.9928	0.93297	23.515	3.7834	4.0678		0.96328	0.56333	1.3543	1.8481	0.88628	0.28782	2.1888	13.239		3.6903	4.5599	3.4776	22.704	3.6056	73.114	6.8471	62.02		0.7038	17.961	0.93361	1.2203
496.385	5.6705	0.15474	8.3489	3.5583	4.67	1.643	2.243	20.05		3.7867	61.712	3.7731	5.0165	2.1307	1.6587	2.2972	5.8531		8.4627	5.4634	1.4101	2.9187	0.93178	23.835	3.8667	4.0349		0.97276	0.56493	1.3472	1.8275	0.84849	0.32719	2.0946	13.267		3.6443	5.0849	3.4099	22.462	3.6484	74.951	6.7731	59.931		0.6776	17.858	0.96088	1.3221
496.904	5.6788	0.1545	8.3632	3.3992	4.5941	1.6427	2.3518	19.358		3.8581	61.191	3.882	4.9842	2.0144	1.7259	2.245	5.614		8.4785	5.6708	1.3629	2.8337	0.93415	24.055	3.956	4.0122		0.98168	0.56832	1.3416	1.8049	0.81486	0.38089	2.002	13.301		3.6097	5.5889	3.3025	22.195	3.6956	76.636	6.8027	58.424		0.65577	17.684	0.99971	1.4299
497.423	5.6715	0.1541	8.3993	3.2544	4.5204	1.6424	2.4804	18.563		3.915	60.472	3.9895	4.9446	1.8982	1.793	2.207	5.3886		8.4977	5.8487	1.3257	2.7395	0.94	24.158	4.0508	3.9993		0.99015	0.57334	1.3381	1.7797	0.78531	0.44853	1.9128	13.337		3.5856	6.0643	3.1523	21.901	3.7478	78.16	6.9195	57.523		0.63842	17.449	1.0481	1.5431
497.942	5.6484	0.15353	8.4569	3.125	4.4523	1.6421	2.6265	17.677		3.9565	59.568	4.094	4.8976	1.7839	1.8586	2.1844	5.1793		8.5214	5.9933	1.2997	2.6383	0.94925	24.133	4.1506	3.9957		0.99827	0.57976	1.3373	1.7514	0.75975	0.5296	1.8282	13.371		3.5705	6.5043	2.958	21.579	3.8054	79.514	7.1073	57.234		0.62565	17.163	1.1042	1.6614
498.462	5.6099	0.15278	8.5354	3.0121	4.3927	1.6418	2.7882	16.714		3.982	58.495	4.1942	4.8436	1.6733	1.921	2.1781	4.988		8.55	6.1015	1.2862	2.5321	0.96186	23.969	4.2549	4.0005		1.0061	0.58732	1.3399	1.7198	0.73811	0.62351	1.7495	13.398		3.5627	6.9031	2.7203	21.229	3.8682	80.69	7.3511	57.546		0.61748	16.838	1.1657	1.7841
498.981	5.5569	0.15185	8.6335	2.9169	4.3447	1.6415	2.9631	15.69		3.991	57.268	4.2886	4.7833	1.568	1.979	2.189	4.8161		8.5837	6.1714	1.2862	2.4231	0.97782	23.662	4.3632	4.0128		1.0138	0.59574	1.3462	1.6847	0.72032	0.72956	1.678	13.412		3.5601	7.256	2.4414	20.852	3.9361	81.679	7.6368	58.43		0.61388	16.487	1.2308	1.9107
499.5	5.4904	0.15075	8.75	2.8401	4.3106	1.6412	3.149	14.622		3.9838	55.906	4.3761	4.7175	1.4697	2.0312	2.2174	4.6642		8.6218	6.2017	1.3004	2.3132	0.99715	23.212	4.4751	4.0315		1.0213	0.60472	1.3566	1.646	0.70637	0.84694	1.6145	13.412		3.5605	7.5589	2.1259	20.448	4.0086	82.472	7.9517	59.843		0.61478	16.12	1.2975	2.0407
500.019	5.4123	0.1495	8.883	2.7828	4.2928	1.6409	3.3436	13.527		3.9606	54.43	4.4556	4.6475	1.3797	2.0766	2.2634	4.5327		8.6635	6.1917	1.3296	2.2043	1.0199	22.623	4.5901	4.0555		1.0288	0.61394	1.3712	1.6038	0.69628	0.97473	1.5599	13.392		3.5617	7.8088	1.7804	20.019	4.085	83.061	8.2847	61.727		0.62006	15.75	1.3639	2.1738
500.538	5.3245	0.14812	9.0307	2.7459	4.2932	1.6406	3.5447	12.426		3.9221	52.862	4.5259	4.5746	1.2995	2.1144	2.3267	4.421		8.707	6.1418	1.3743	2.0982	1.046	21.903	4.7076	4.0834		1.0361	0.62311	1.3901	1.5585	0.69013	1.1119	1.5148	13.352		3.5611	8.0037	1.414	19.566	4.1644	83.436	8.6262	64.013		0.62955	15.388	1.4281	2.3095
501.058	5.2293	0.14663	9.1908	2.7303	4.3133	1.6403	3.75	11.337		3.8693	51.227	4.5864	4.5003	1.23	2.1439	2.4065	4.3283		8.7502	6.0525	1.4347	1.9963	1.0757	21.065	4.8273	4.1141		1.0433	0.63196	1.4132	1.5103	0.68806	1.2572	1.4797	13.289		3.5565	8.1421	1.0377	19.09	4.2457	83.59	8.9685	66.623		0.64303	15.044	1.4884	2.4476
501.577	5.1293	0.14508	9.361	2.7367	4.3542	1.6399	3.9573	10.278		3.8035	49.553	4.6362	4.4264	1.1722	2.1649	2.5019	4.2534		8.7905	5.9251	1.5109	1.9	1.109	20.128	4.9486	4.1462		1.0503	0.64023	1.4403	1.4599	0.69027	1.4094	1.4546	13.204		3.5458	8.2236	0.66484	18.595	4.3279	83.515	9.3049	69.473		0.66025	14.727	1.5434	2.5878
502.096	5.0272	0.14351	9.5388	2.766	4.4164	1.6394	4.1644	9.2682		3.7261	47.866	4.675	4.3549	1.1267	2.1772	2.6113	4.1943		8.8248	5.7614	1.6028	1.8102	1.146	19.114	5.071	4.1787		1.0569	0.64772	1.4707	1.4079	0.69702	1.567	1.4397	13.098		3.5268	8.2482	0.3108	18.083	4.4098	83.206	9.6307	72.474		0.68093	14.444	1.5917	2.7299
502.615	4.9257	0.14197	9.7217	2.819	4.5001	1.6387	4.3693	8.3247		3.6387	46.197	4.7022	4.2877	1.0941	2.181	2.7329	4.1492		8.8499	5.5632	1.7098	1.7279	1.1865	18.049	5.1941	4.2103		1.0631	0.65426	1.5041	1.3548	0.70859	1.7284	1.4349	12.974		3.498	8.2169	-0.0071966	17.556	4.4902	82.661	9.9421	75.536		0.70475	14.2	1.632	2.8737
503.135	4.8279	0.14049	9.9072	2.8962	4.6052	1.6378	4.5699	7.4638		3.5433	44.576	4.7178	4.2267	1.0745	2.1767	2.8644	4.1157		8.8622	5.333	1.8314	1.6534	1.2308	16.96	5.3172	4.2402		1.0687	0.65974	1.5395	1.3015	0.72532	1.8922	1.4398	12.835		3.458	8.131	-0.27028	17.016	4.5678	81.88	10.237	78.572		0.73139	13.999	1.6634	3.019
503.654	4.7364	0.13912	10.093	2.998	4.7306	1.6366	4.7641	6.7001		3.4416	43.032	4.7217	4.174	1.0679	2.165	3.0036	4.0916		8.8584	5.0734	1.9666	1.5872	1.2787	15.882	5.44	4.2674		1.0736	0.66412	1.5763	1.2486	0.74757	2.0564	1.4539	12.687		3.4057	7.9923	-0.45831	16.468	4.6417	80.868	10.513	81.497		0.76051	13.843	1.6851	3.1655
504.173	4.654	0.13792	10.277	3.1249	4.8753	1.6352	4.9499	6.0465		3.3357	41.596	4.7141	4.1313	1.0739	2.1466	3.1475	4.0745		8.835	4.7872	2.1141	1.5296	1.3301	14.846	5.5616	4.2911		1.0774	0.66738	1.6135	1.1971	0.77567	2.2194	1.4767	12.535		3.3405	7.8034	-0.55023	15.912	4.7107	79.635	10.77	84.233		0.79176	13.732	1.6966	3.3128
504.692	4.5834	0.13691	10.456	3.2766	5.0374	1.6334	5.1253	5.5138		3.2274	40.295	4.6954	4.1002	1.0923	2.1226	3.2932	4.0622		8.789	4.4773	2.2726	1.4804	1.3849	13.888	5.6816	4.3108		1.0801	0.6696	1.65	1.1475	0.80995	2.3793	1.5075	12.384		3.2623	7.5671	-0.52459	15.354	4.7737	78.195	11.008	86.707		0.82481	13.664	1.6975	3.4606
505.212	4.5271	0.13614	10.63	3.453	5.2146	1.6311	5.2885	5.1105		3.1188	39.154	4.6659	4.082	1.1223	2.094	3.4378	4.0526		8.7178	4.147	2.4403	1.4397	1.4428	13.045	5.7993	4.3261		1.0814	0.67088	1.6848	1.1007	0.8507	2.5344	1.5453	12.241		3.1713	7.2867	-0.36004	14.795	4.8297	76.566	11.227	88.859		0.85933	13.634	1.6878	3.6083
505.731	4.4871	0.13564	10.796	3.6534	5.4042	1.6285	5.4377	4.8424		3.0116	38.195	4.6265	4.0778	1.163	2.0619	3.578	4.044		8.6196	3.7996	2.6152	1.4074	1.5036	12.353	5.9141	4.3365		1.0812	0.6714	1.7168	1.0572	0.89813	2.683	1.5893	12.111		3.0681	6.9659	-0.035905	14.239	4.8776	74.772	11.427	90.634		0.89501	13.638	1.6677	3.755
506.25	4.4656	0.13542	10.953	3.8768	5.603	1.6253	5.5713	4.7129		2.9076	37.435	4.5779	4.0879	1.2135	2.0275	3.7107	4.0347		8.493	3.4386	2.795	1.3831	1.5669	11.846	6.0252	4.342		1.0793	0.67137	1.745	1.0175	0.95238	2.8233	1.6384	12		2.9537	6.6089	0.46716	13.69	4.9166	72.841	11.609	91.992		0.93158	13.67	1.6378	3.8999
506.769	4.4641	0.1355	11.099	4.1216	5.8075	1.6216	5.6876	4.7227		2.8084	36.887	4.5209	4.1124	1.2726	1.9919	3.8328	4.0237		8.3377	3.0677	2.9774	1.3668	1.6324	11.559	6.132	4.3424		1.0756	0.67104	1.7683	0.98214	1.0135	2.954	1.6916	11.911		2.8295	6.2202	1.1666	13.151	4.9455	70.805	11.775	92.901		0.96879	13.721	1.5987	4.0418
507.289	4.4841	0.13587	11.234	4.386	6.0136	1.6174	5.7856	4.8696		2.7154	36.559	4.4567	4.1509	1.339	1.9561	3.9413	4.0099		8.1539	2.6908	3.1596	1.3583	1.6996	11.524	6.234	4.3378		1.07	0.67073	1.7859	0.95139	1.0813	3.0737	1.7477	11.85		2.6973	5.8048	2.0772	12.626	4.9633	68.699	11.923	93.342		1.0064	13.784	1.5514	4.1796
507.808	4.5264	0.13653	11.357	4.6677	6.2172	1.6127	5.8642	5.1488		2.6298	36.451	4.3864	4.2024	1.4114	1.921	4.0335	3.9928		7.9432	2.312	3.3389	1.3573	1.768	11.768	6.3306	4.3284		1.0624	0.67076	1.7968	0.92547	1.1555	3.1813	1.8056	11.817		2.5589	5.3678	3.2107	12.119	4.9693	66.559	12.054	93.308		1.0443	13.85	1.4971	4.3115
508.327	4.5918	0.13746	11.466	4.9637	6.4137	1.6075	5.9228	5.5529		2.5526	36.56	4.3111	4.2654	1.4882	1.8877	4.1069	3.9721		7.7075	1.9356	3.5123	1.3636	1.8371	12.318	6.4213	4.3145		1.0529	0.67149	1.8004	0.90448	1.2359	3.2762	1.8641	11.814		2.4165	4.9151	4.5749	11.633	4.9625	64.421	12.169	92.8		1.0823	13.913	1.4372	4.4361
508.846	4.6804	0.13863	11.561	5.2709	6.5986	1.6018	5.961	6.0719		2.4845	36.875	4.2322	4.3379	1.5681	1.8567	4.1594	3.9476		7.4501	1.5661	3.6769	1.3772	1.9063	13.192	6.5057	4.2964		1.0414	0.67329	1.7962	0.88837	1.3218	3.3578	1.9219	11.841		2.2726	4.4528	6.1736	11.171	4.9422	62.324	12.266	91.835		1.1203	13.963	1.3732	4.5515
509.365	4.7921	0.14	11.641	5.5855	6.7675	1.5957	5.9789	6.6935		2.4259	37.379	4.151	4.4175	1.6494	1.8286	4.1893	3.9194		7.1745	1.2084	3.8299	1.3979	1.9751	14.407	6.5835	4.2747		1.028	0.67654	1.7839	0.87702	1.4126	3.4258	1.9779	11.896		2.1297	3.9872	8.0057	10.736	4.9078	60.301	12.345	90.434		1.1582	13.995	1.307	4.6558
509.885	4.9264	0.14153	11.705	5.9035	6.9159	1.5892	5.9769	7.4033		2.3771	38.052	4.0689	4.5017	1.7307	1.8039	4.1952	3.8877		6.8851	0.86778	3.9685	1.4254	2.0427	15.972	6.6544	4.2499		1.0129	0.6816	1.7634	0.87019	1.5074	3.4805	2.0309	11.976		1.9903	3.5253	10.065	10.332	4.8589	58.384	12.404	88.632		1.1958	14.002	1.2401	4.7471
510.404	5.0825	0.14316	11.752	6.2205	7.0398	1.5825	5.9555	8.1849		2.3381	38.866	3.9873	4.5874	1.8105	1.7828	4.1766	3.853		6.5868	0.54963	4.09	1.4596	2.1087	17.889	6.7182	4.2227		0.99619	0.68883	1.7347	0.86754	1.6051	3.5222	2.0797	12.078		1.8571	3.0744	12.34	9.9597	4.7954	56.601	12.443	86.471		1.2333	13.981	1.1744	4.8235
510.923	5.259	0.14485	11.782	6.532	7.1354	1.5757	5.9159	9.0207		2.3085	39.792	3.9077	4.6715	1.8874	1.7654	4.1331	3.8155		6.2846	0.25981	4.1921	1.5001	2.1723	20.156	6.7749	4.1937		0.97802	0.69854	1.6983	0.86866	1.7048	3.5518	2.1232	12.197		1.7328	2.6418	14.814	9.6218	4.7175	54.975	12.46	83.999		1.2704	13.93	1.1117	4.8832
511.442	5.4545	0.14653	11.793	6.833	7.1997	1.5688	5.8594	9.8917		2.2879	40.795	3.8313	4.751	1.96	1.7517	4.0653	3.7756		5.9837	0.0045196	4.273	1.5466	2.2331	22.76	6.8243	4.1639		0.95859	0.71102	1.6547	0.87309	1.8052	3.5702	2.1606	12.327		1.6199	2.2357	17.466	9.3191	4.6256	53.523	12.453	81.272		1.3072	13.847	1.0537	4.9245
511.961	5.6672	0.14815	11.786	7.1188	7.23	1.562	5.7873	10.778		2.2756	41.841	3.7596	4.8227	2.0271	1.7414	3.9742	3.7337		5.6894	-0.20973	4.3309	1.5986	2.2903	25.686	6.8663	4.1339		0.93812	0.7265	1.6046	0.88029	1.9051	3.5788	2.1908	12.464		1.5211	1.8639	20.267	9.0521	4.5207	52.253	12.422	78.348		1.3435	13.733	1.0018	4.9461
512.481	5.8949	0.14965	11.759	7.3845	7.2248	1.5554	5.7015	11.66		2.2708	42.893	3.6935	4.8837	2.0875	1.7344	3.8612	3.6902		5.4065	-0.37608	4.3647	1.6556	2.3436	28.906	6.9007	4.1045		0.91681	0.74512	1.5492	0.88972	2.003	3.579	2.213	12.601		1.4386	1.5348	23.186	8.8206	4.4039	51.17	12.366	75.291		1.3792	13.591	0.95773	4.9467
513	6.1354	0.15098	11.713	7.6253	7.1828	1.5492	5.6038	12.518		2.2726	43.914	3.6341	4.9315	2.1403	1.7301	3.7286	3.6452		5.1398	-0.48742	4.374	1.717	2.3923	32.391	6.9273	4.0766		0.8949	0.76699	1.4895	0.90081	2.0976	3.5724	2.2268	12.732		1.3748	1.2568	26.187	8.6237	4.2766	50.269	12.282	72.166		1.4142	13.425	0.92255	4.9256
513.519	6.386	0.1521	11.649	7.8367	7.1042	1.5435	5.496	13.333		2.2798	44.868	3.5822	4.964	2.1846	1.7281	3.5787	3.5989		4.8932	-0.5364	4.3584	1.7819	2.4361	36.1	6.9457	4.0507		0.87259	0.79209	1.4267	0.913	2.1877	3.5607	2.2315	12.854		1.3316	1.0382	29.228	8.4598	4.1408	49.54	12.171	69.039		1.4483	13.241	0.89737	4.8824
514.038	6.6439	0.15296	11.565	8.0146	6.9895	1.5384	5.3801	14.087		2.2915	45.722	3.5384	4.9793	2.2198	1.7278	3.4147	3.5514		4.6703	-0.51551	4.3186	1.8494	2.4745	39.991	6.9556	4.0275		0.85012	0.82036	1.3624	0.92575	2.2719	3.5457	2.2268	12.962		1.3108	0.88711	32.268	8.3264	3.9984	48.966	12.032	65.976		1.4815	13.046	0.88297	4.8172
514.558	6.9061	0.15353	11.463	8.1553	6.8403	1.534	5.2581	14.764		2.3065	46.443	3.5029	4.9763	2.2454	1.7286	3.2397	3.5028		4.4738	-0.41721	4.2553	1.9187	2.5072	44.012	6.9564	4.0073		0.82773	0.8516	1.2978	0.93856	2.3489	3.529	2.2125	13.052		1.3141	0.81148	35.261	8.2207	3.8517	48.525	11.866	63.043		1.5134	12.848	0.87994	4.7304
515.077	7.1692	0.1538	11.343	8.2555	6.659	1.5304	5.1317	15.35		2.3235	47.004	3.4758	4.9545	2.2611	1.7297	3.0573	3.4531		4.3057	-0.234	4.1699	1.9886	2.5338	48.11	6.9476	3.9904		0.80564	0.88555	1.2344	0.951	2.4178	3.5124	2.1888	13.124		1.3425	0.81883	38.16	8.139	3.7031	48.189	11.672	60.303		1.5441	12.656	0.88856	4.6231
515.596	7.4299	0.15374	11.206	8.313	6.4487	1.5277	5.0029	15.835		2.3416	47.382	3.457	4.9139	2.2668	1.7304	2.8708	3.4021		4.1672	0.041385	4.0642	2.058	2.5543	52.227	6.9286	3.977		0.78409	0.92183	1.1736	0.96267	2.4775	3.4971	2.1557	13.174		1.3969	0.91612	40.919	8.0772	3.5551	47.929	11.451	57.817		1.5732	12.48	0.90889	4.4966
516.115	7.6847	0.15336	11.054	8.3261	6.2129	1.5258	4.8734	16.209		2.3597	47.556	3.4459	4.855	2.2623	1.73	2.6841	3.3498		4.0585	0.41586	3.9403	2.126	2.5682	56.302	6.8988	3.9669		0.76335	0.95998	1.1167	0.9733	2.5273	3.4847	2.1136	13.205		1.4779	1.1096	43.492	8.0311	3.4102	47.711	11.205	55.643		1.6007	12.329	0.94071	4.3528
516.635	7.9298	0.15266	10.887	8.2942	5.9558	1.5248	4.7447	16.469		2.3767	47.511	3.442	4.7792	2.248	1.7276	2.5004	3.2961		3.9794	0.89579	3.8006	2.1913	2.5756	60.273	6.8578	3.9599		0.74365	0.99946	1.0649	0.98269	2.5667	3.476	2.0631	13.218		1.5855	1.4048	45.837	7.9958	3.2707	47.502	10.936	53.835		1.6266	12.214	0.98357	4.1939
517.154	8.1616	0.15166	10.706	8.2178	5.6819	1.5247	4.6182	16.613		2.3917	47.238	3.4446	4.6882	2.224	1.7227	2.3231	3.2409		3.9286	1.4867	3.6477	2.2529	2.5761	64.076	6.8052	3.9557		0.72524	1.0397	1.0192	0.99071	2.5951	3.4719	2.0048	13.214		1.7195	1.806	47.912	7.9669	3.1388	47.269	10.646	52.442		1.6508	12.142	1.0368	4.0225
517.673	8.3765	0.15039	10.515	8.0984	5.3959	1.5255	4.4953	16.645		2.4042	46.73	3.4526	4.5839	2.1908	1.7143	2.1553	3.1841		3.9045	2.1933	3.4844	2.31	2.5698	67.65	6.7407	3.9536		0.70839	1.0799	0.98065	0.99736	2.6125	3.4728	1.9396	13.198		1.8792	2.3167	49.683	7.9399	3.0164	46.98	10.338	51.509		1.6735	12.123	1.0995	3.8414
518.192	8.5709	0.14888	10.312	7.9389	5.1025	1.527	4.3772	16.571		2.4133	45.987	3.4651	4.4691	2.1488	1.702	1.9995	3.1256		3.9049	3.0189	3.3134	2.3617	2.5566	70.934	6.6645	3.9532		0.69332	1.1195	0.94981	1.0027	2.619	3.479	1.8684	13.173		2.0635	2.9389	51.118	7.9104	2.9054	46.605	10.017	51.074		1.6947	12.163	1.1706	3.6536
518.712	8.7414	0.14716	10.102	7.7431	4.8066	1.5292	4.2647	16.403		2.4186	45.013	3.481	4.3463	2.0987	1.6851	1.8581	3.0656		3.9272	3.9655	3.1375	2.4074	2.5363	73.87	6.5769	3.9537		0.68026	1.1577	0.92719	1.0068	2.6148	3.4901	1.7923	13.143		2.2708	3.6732	52.193	7.875	2.807	46.121	9.6863	51.167		1.7147	12.27	1.2488	3.4621
519.231	8.8851	0.14529	9.8846	7.5162	4.5125	1.532	4.1587	16.154		2.4198	43.818	3.4995	4.2184	2.041	1.6631	1.7329	3.0039		3.9687	5.0333	2.9595	2.4467	2.5092	76.404	6.4786	3.9544		0.6694	1.1937	0.91305	1.01	2.6004	3.5056	1.7124	13.114		2.4991	4.5188	52.888	7.8304	2.7222	45.506	9.3526	51.814		1.734	12.449	1.3329	3.2701
519.75	8.9992	0.14332	9.6627	7.2645	4.2244	1.5353	4.0599	15.842		2.4167	42.415	3.5196	4.0883	1.9765	1.6356	1.6254	2.9408		4.0267	6.2209	2.7819	2.4794	2.4752	78.488	6.3704	3.9545		0.66092	1.227	0.90742	1.0124	2.5765	3.5249	1.6301	13.09		2.7463	5.4732	53.194	7.7744	2.6516	44.745	9.0211	53.03		1.753	12.702	1.4215	3.0806
520.269	9.0816	0.14129	9.4386	6.9953	3.9462	1.539	3.9688	15.489		2.4092	40.821	3.5406	3.9589	1.9059	1.6024	1.5364	2.8763		4.0986	7.5248	2.6072	2.5055	2.4347	80.078	6.2537	3.9533		0.65494	1.2569	0.91014	1.0144	2.5439	3.5466	1.5467	13.075		3.0094	6.5323	53.106	7.7057	2.5954	43.829	8.6984	54.821		1.7721	13.031	1.5129	2.8964
520.788	9.1303	0.13927	9.2146	6.7168	3.681	1.543	3.8858	15.119		2.3974	39.059	3.5621	3.8328	1.83	1.5633	1.4663	2.8108		4.1821	8.9393	2.4376	2.5256	2.3878	81.141	6.1298	3.9502		0.65155	1.2828	0.9208	1.0161	2.5036	3.5696	1.4634	13.072		3.2855	7.69	52.626	7.6237	2.5535	42.756	8.391	57.185		1.7922	13.438	1.6058	2.7203
521.308	9.1443	0.1373	8.9934	6.438	3.4318	1.547	3.8112	14.756		2.3816	37.152	3.5837	3.7126	1.7496	1.5184	1.4151	2.7446		4.2754	10.457	2.2752	2.54	2.3351	81.65	6.0006	3.9444		0.65077	1.3041	0.93882	1.0179	2.4566	3.5921	1.3818	13.085		3.5714	8.9384	51.766	7.5288	2.5254	41.528	8.1056	60.109		1.8137	13.919	1.6987	2.5544
521.827	9.1228	0.13544	8.7781	6.1683	3.2005	1.5511	3.7451	14.43		2.362	35.13	3.6055	3.6003	1.6656	1.4679	1.3824	2.6781		4.3773	12.067	2.1217	2.5496	2.2771	81.587	5.8679	3.9356		0.65258	1.3207	0.96344	1.02	2.4041	3.6126	1.3031	13.115		3.8634	10.268	50.541	7.4227	2.5102	40.155	7.8489	63.568		1.8375	14.473	1.7901	2.401
522.346	9.0658	0.13373	8.5718	5.9175	2.989	1.5551	3.6878	14.168		2.3391	33.021	3.6279	3.4978	1.5789	1.4122	1.3673	2.612		4.487	13.757	1.9788	2.5554	2.2145	80.945	5.7336	3.9232		0.65692	1.3321	0.99373	1.0227	2.3472	3.6293	1.2287	13.164		4.158	11.667	48.975	7.3076	2.507	38.65	7.627	67.528		1.8642	15.094	1.8786	2.2617
522.865	8.9738	0.13221	8.3779	5.6955	2.7981	1.5588	3.6393	13.998		2.3132	30.858	3.6516	3.4065	1.4904	1.3517	1.3685	2.5468		4.6047	15.514	1.8478	2.5585	2.1483	79.728	5.5999	3.9071		0.66366	1.3383	1.0286	1.026	2.2871	3.6403	1.16	13.231		4.4514	13.122	47.095	7.187	2.5144	37.033	7.4455	71.942		1.8946	15.775	1.9629	2.1378
523.385	8.8478	0.13093	8.2	5.5119	2.6285	1.5623	3.5998	13.948		2.285	28.673	3.6775	3.3276	1.4008	1.2871	1.3845	2.4833		4.7308	17.32	1.7297	2.5605	2.0792	77.95	5.4686	3.887		0.67261	1.3393	1.0671	1.0301	2.2251	3.6441	1.0982	13.316		4.7402	14.618	44.936	7.0649	2.531	35.327	7.3091	76.755		1.9292	16.509	2.042	2.0303
523.904	8.6892	0.12992	8.0416	5.3759	2.4802	1.5653	3.5695	14.044		2.2549	26.498	3.7068	3.2618	1.3112	1.2193	1.4135	2.4223		4.8668	19.158	1.6256	2.5625	2.0085	75.635	5.3416	3.863		0.68355	1.335	1.1078	1.0351	2.1622	3.6389	1.0444	13.417		5.0208	16.139	42.535	6.9464	2.5554	33.558	7.2217	81.898		1.9685	17.286	2.1147	1.9397
524.423	8.4998	0.12919	7.9063	5.2959	2.3529	1.5678	3.5486	14.309		2.2234	24.364	3.7409	3.2094	1.2224	1.1493	1.4536	2.3647		5.0144	21.009	1.5362	2.566	1.9373	72.82	5.2205	3.8352		0.69621	1.3258	1.1495	1.0409	2.0996	3.6235	0.99955	13.53		5.29	17.666	39.932	6.8372	2.5859	31.752	7.1859	87.295		2.0129	18.095	2.1801	1.8664
524.942	8.282	0.12876	7.7977	5.2794	2.2457	1.5698	3.5374	14.763		2.191	22.304	3.7814	3.1706	1.1351	1.078	1.5027	2.3115		5.1757	22.851	1.4619	2.5725	1.8668	69.549	5.1067	3.804		0.71031	1.3118	1.1911	1.0477	2.0383	3.5965	0.96463	13.654		5.545	19.181	37.17	6.7435	2.6211	29.939	7.2031	92.862		2.0627	18.926	2.2376	1.8102
525.462	8.0381	0.12863	7.7189	5.3324	2.1576	1.5712	3.5365	15.422		2.1582	20.344	3.8297	3.145	1.0503	1.0068	1.5585	2.2637		5.3533	24.664	1.4033	2.5832	1.7983	65.877	5.0014	3.7698		0.7255	1.2934	1.2313	1.0553	1.9792	3.5573	0.94029	13.784		5.7833	20.666	34.292	6.6721	2.6594	28.148	7.2734	98.506		2.1177	19.765	2.2864	1.7706
525.981	7.771	0.12881	7.6731	5.4596	2.0874	1.572	3.5463	16.298		2.1254	18.511	3.8874	3.1321	0.96865	0.93672	1.619	2.2222		5.5495	26.424	1.3605	2.5993	1.733	61.865	4.9052	3.7332		0.74147	1.2711	1.269	1.0635	1.9232	3.5052	0.92707	13.916		6.003	22.099	31.341	6.6302	2.6995	26.404	7.3954	104.13		2.1777	20.6	2.3261	1.7471
526.5	7.4836	0.12929	7.663	5.664	2.0336	1.5722	3.5675	17.398		2.0928	16.828	3.9556	3.1314	0.89097	0.86917	1.682	2.1881		5.767	28.111	1.3335	2.6218	1.6722	57.582	4.8186	3.695		0.75785	1.2453	1.3031	1.0723	1.8708	3.4399	0.92529	14.046		6.2027	23.462	28.361	6.6253	2.7403	24.733	7.5667	109.63		2.2424	21.418	2.3564	1.7386
527.019	7.179	0.13003	7.6908	5.9465	1.9946	1.5718	3.6006	18.724		2.0609	15.315	4.0354	3.1419	0.81793	0.80544	1.7456	2.1624		6.008	29.702	1.3222	2.6514	1.6171	53.099	4.7416	3.656		0.7743	1.2166	1.3328	1.0813	1.8228	3.3618	0.93506	14.171		6.3815	24.738	25.391	6.6649	2.7808	23.159	7.7833	114.91		2.3109	22.205	2.3771	1.744
527.538	6.8604	0.13104	7.7581	6.3064	1.9686	1.5707	3.6464	20.271		2.0297	13.988	4.1273	3.1627	0.7502	0.74679	1.8079	2.1459		6.2743	31.175	1.3263	2.6886	1.5688	48.492	4.674	3.6172		0.79048	1.1854	1.3572	1.0905	1.7795	3.2712	0.95626	14.287		6.5392	25.907	22.472	6.7566	2.8203	21.701	8.0403	119.87		2.3822	22.951	2.3883	1.7619
528.058	6.5313	0.13227	7.8662	6.7407	1.9541	1.5691	3.7055	22.031		1.9995	12.859	4.2316	3.1927	0.68839	0.69448	1.8674	2.1396		6.5675	32.51	1.3454	2.7336	1.5282	43.836	4.6151	3.5795		0.80608	1.1523	1.3757	1.0995	1.7413	3.1691	0.98858	14.392		6.6761	26.956	19.637	6.9077	2.8582	20.374	8.3317	124.41		2.4553	23.642	2.39	1.7908
528.577	6.1953	0.13369	8.0155	7.2442	1.9492	1.5671	3.7785	23.989		1.9703	11.937	4.3479	3.2308	0.63308	0.64969	1.9226	2.1441		6.8882	33.689	1.3787	2.7863	1.4961	39.208	4.5642	3.544		0.82081	1.1179	1.3879	1.1082	1.7084	3.0566	1.0315	14.483		6.7928	27.87	16.92	7.1249	2.8944	19.192	8.6506	128.44		2.5286	24.269	2.3825	1.8291
529.096	5.8561	0.13527	8.2056	7.81	1.9524	1.5646	3.8659	26.124		1.9422	11.227	4.4753	3.2759	0.58481	0.61348	1.9725	2.16		7.2365	34.694	1.4254	2.8465	1.4733	34.679	4.5201	3.5118		0.83439	1.0827	1.3933	1.1163	1.681	2.9353	1.0841	14.559		6.8906	28.64	14.347	7.4146	2.9288	18.163	8.9898	131.88		2.6007	24.823	2.3661	1.875
529.615	5.5177	0.13697	8.4357	8.429	1.9621	1.5618	3.9679	28.414		1.9152	10.729	4.6123	3.3269	0.54407	0.58681	2.0161	2.1878		7.6119	35.509	1.4844	2.9134	1.4602	30.32	4.4816	3.484		0.84659	1.0472	1.3918	1.1235	1.6591	2.8069	1.1456	14.619		6.9711	29.258	11.942	7.7818	2.962	17.291	9.3414	134.64		2.6698	25.295	2.3415	1.9266
530.135	5.184	0.13874	8.7039	9.0904	1.9768	1.5588	4.0848	30.829		1.8894	10.441	4.757	3.3825	0.51129	0.5705	2.0528	2.2276		8.0127	36.123	1.5545	2.9863	1.4572	26.194	4.4473	3.4616		0.85723	1.0118	1.3835	1.1298	1.6425	2.6732	1.2148	14.665		7.0359	29.718	9.7239	8.2309	2.9943	16.579	9.6974	136.68		2.7341	25.681	2.3092	1.9821
530.654	4.8592	0.14056	9.0075	9.7817	1.995	1.5557	4.2163	33.339		1.8647	10.357	4.9068	3.4418	0.4869	0.5652	2.0823	2.2795		8.4366	36.525	1.6343	3.0639	1.4643	22.361	4.4158	3.4457		0.86615	0.9772	1.3685	1.135	1.6312	2.5365	1.2903	14.696		7.087	30.021	7.7083	8.7645	3.0265	16.025	10.05	137.92		2.7918	25.976	2.27	2.0397
531.173	4.5475	0.14238	9.343	10.489	2.0155	1.5527	4.3618	35.908		1.8413	10.466	5.0588	3.5036	0.47123	0.5714	2.1045	2.3432		8.8806	36.709	1.7221	3.1452	1.4815	18.871	4.3858	3.4372		0.87323	0.94364	1.3471	1.1388	1.625	2.3987	1.3707	14.715		7.1262	30.169	5.9053	9.3837	3.0597	15.624	10.392	138.35		2.8413	26.18	2.2248	2.0974
531.692	4.2532	0.14417	9.7064	11.198	2.0371	1.5498	4.5207	38.5		1.8193	10.757	5.2097	3.5669	0.46459	0.58937	2.1196	2.4182		9.3407	36.67	1.8163	3.2286	1.5085	15.769	4.3558	3.4371		0.87839	0.91153	1.3198	1.1413	1.6236	2.2621	1.4545	14.724		7.1552	30.168	4.3214	10.088	3.0948	15.37	10.715	137.93		2.8808	26.292	2.1745	2.1535
532.212	3.9804	0.14588	10.093	11.893	2.0586	1.5471	4.6916	41.077		1.7988	11.214	5.3558	3.6308	0.46725	0.61923	2.128	2.5039		9.8122	36.41	1.9151	3.3127	1.545	13.089	4.3246	3.446		0.88161	0.8812	1.2872	1.1425	1.6267	2.1288	1.5399	14.725		7.1755	30.029	2.9594	10.874	3.1329	15.256	11.014	136.66		2.9091	26.317	2.1201	2.2063
532.731	3.7332	0.1475	10.496	12.559	2.0791	1.5449	4.8731	43.601		1.7801	11.821	5.4935	3.6942	0.4794	0.66084	2.1301	2.5992		10.29	35.93	2.0164	3.396	1.5901	10.86	4.291	3.4648		0.88287	0.85292	1.25	1.1422	1.634	2.0008	1.6253	14.719		7.1881	29.765	1.8182	11.738	3.175	15.272	11.283	134.54		2.9248	26.259	2.0628	2.2542
533.25	3.5153	0.14898	10.911	13.18	2.0976	1.5433	5.0633	46.035		1.7635	12.558	5.619	3.7563	0.50119	0.7139	2.1269	2.7031		10.767	35.24	2.1184	3.4769	1.6432	9.1002	4.2542	3.4939		0.88221	0.8269	1.209	1.1405	1.6451	1.88	1.7091	14.71		7.1938	29.393	0.89394	12.671	3.2221	15.41	11.517	131.61		2.9271	26.126	2.0036	2.2959
533.769	3.3301	0.15032	11.331	13.742	2.1132	1.5424	5.26	48.342		1.7496	13.404	5.7288	3.816	0.53267	0.77787	2.1193	2.8139		11.238	34.349	2.219	3.5542	1.7032	7.8206	4.2134	3.5337		0.87968	0.80329	1.1651	1.1374	1.6595	1.7681	1.7895	14.699		7.1926	28.932	0.17981	13.666	3.2749	15.659	11.712	127.91		2.9156	25.928	1.9436	2.3302
534.288	3.1806	0.15148	11.75	14.231	2.1252	1.5422	5.4608	50.486		1.7388	14.339	5.8195	3.8725	0.57386	0.85203	2.1083	2.9303		11.696	33.273	2.3164	3.6263	1.7691	7.0237	4.1682	3.5843		0.87537	0.7822	1.1195	1.1331	1.677	1.6666	1.865	14.686		7.1845	28.402	-0.33325	14.709	3.334	16.01	11.866	123.48		2.89	25.677	1.8839	2.3561
534.808	3.0694	0.15245	12.161	14.635	2.1327	1.543	5.6631	52.433		1.7317	15.34	5.8884	3.9248	0.62465	0.93546	2.0951	3.0504		12.134	32.029	2.4087	3.6922	1.8396	6.7042	4.1181	3.6459		0.86938	0.76367	1.0731	1.1276	1.697	1.5768	1.9341	14.673		7.1685	27.827	-0.6562	15.788	3.3996	16.453	11.977	118.42		2.8507	25.386	1.8254	2.3729
535.327	2.9984	0.15323	12.56	14.944	2.1351	1.5447	5.8642	54.155		1.729	16.386	5.9331	3.9717	0.68484	1.027	2.0809	3.1724		12.543	30.637	2.4942	3.7508	1.9134	6.8497	4.0634	3.7181		0.86181	0.7477	1.0272	1.121	1.719	1.4997	1.9956	14.66		7.1434	27.229	-0.80142	16.887	3.4714	16.981	12.044	112.79		2.7983	25.07	1.769	2.3801
535.846	2.9688	0.15381	12.939	15.15	2.1318	1.5475	6.0615	55.621		1.7312	17.455	5.9519	4.0123	0.75415	1.1255	2.0672	3.2946		12.918	29.122	2.5713	3.8012	1.989	7.4406	4.0041	3.8008		0.85281	0.73423	0.98299	1.1133	1.7425	1.436	2.0483	14.645		7.1077	26.632	-0.78228	17.99	3.5491	17.584	12.068	106.7		2.7337	24.745	1.7155	2.3776
536.365	2.9812	0.15419	13.294	15.247	2.1222	1.5513	6.2524	56.81		1.739	18.528	5.9441	4.0455	0.83212	1.2295	2.0552	3.415		13.252	27.507	2.6386	3.843	2.0651	8.4514	3.9409	3.8933		0.84249	0.72317	0.94161	1.1048	1.7671	1.3863	2.0914	14.628		7.0596	26.059	-0.61278	19.077	3.6317	18.255	12.049	100.25		2.6585	24.428	1.6656	2.3656
536.885	3.0355	0.15437	13.622	15.234	2.106	1.5563	6.4346	57.7		1.753	19.585	5.9094	4.0701	0.91819	1.3375	2.0462	3.5318		13.537	25.819	2.6951	3.8757	2.1402	9.8509	3.8744	3.995		0.831	0.7144	0.90433	1.0954	1.7921	1.3507	2.1241	14.607		6.9971	25.531	-0.30713	20.131	3.718	18.987	11.991	93.554		2.5742	24.137	1.6197	2.3442
537.404	3.1308	0.15436	13.918	15.109	2.0827	1.5623	6.6061	58.274		1.7737	20.611	5.8488	4.0851	1.0116	1.4478	2.0416	3.6435		13.768	24.084	2.7398	3.8991	2.2127	11.603	3.8055	4.105		0.81848	0.70776	0.87235	1.0853	1.8172	1.3294	2.1461	14.578		6.9182	25.068	0.12056	21.133	3.8062	19.772	11.895	86.715		2.4828	23.889	1.5781	2.3142
537.923	3.2656	0.15417	14.18	14.875	2.0523	1.5694	6.7651	58.522		1.8016	21.592	5.7637	4.0893	1.1116	1.5588	2.0426	3.7485		13.942	22.327	2.7721	3.9135	2.2814	13.667	3.7355	4.2223		0.80507	0.70307	0.84682	1.0745	1.8417	1.322	2.1571	14.54		6.8213	24.686	0.65654	22.064	3.8943	20.602	11.767	79.85		2.3862	23.7	1.5411	2.2764
538.442	3.4377	0.1538	14.407	14.537	2.0146	1.5775	6.9105	58.435		1.8369	22.515	5.6566	4.0818	1.217	1.6689	2.0501	3.8454		14.054	20.576	2.7917	3.9189	2.3449	15.999	3.6655	4.3459		0.79091	0.70016	0.82882	1.0632	1.8651	1.328	2.1575	14.49		6.7049	24.401	1.2877	22.908	3.9801	21.471	11.609	73.068		2.2868	23.587	1.5085	2.2316
538.962	3.644	0.15327	14.598	14.104	1.9696	1.5865	7.0414	58.013		1.8798	23.373	5.5305	4.0618	1.3266	1.7763	2.0653	3.9332		14.101	18.853	2.7985	3.9159	2.4021	18.554	3.5969	4.4745		0.77616	0.69883	0.81933	1.0513	1.887	1.3468	2.1474	14.426		6.5681	24.224	2.0016	23.65	4.0612	22.37	11.428	66.471		2.1868	23.567	1.4804	2.1811
539.481	3.8812	0.1526	14.751	13.583	1.9178	1.5962	7.1574	57.258		1.9301	24.159	5.3892	4.0285	1.4391	1.8795	2.0888	4.011		14.084	17.182	2.7927	3.9049	2.4517	21.281	3.531	4.607		0.76095	0.6989	0.81917	1.039	1.9067	1.3773	2.1275	14.344		6.4105	24.163	2.7868	24.274	4.1349	23.291	11.229	60.156		2.0884	23.652	1.4564	2.1261
540	4.1452	0.15179	14.867	12.986	1.8594	1.6066	7.2587	56.179		1.9876	24.873	5.2368	3.9816	1.5531	1.9769	2.1212	4.0782		14.003	15.582	2.7747	3.8865	2.4931	24.13	3.4693	4.7421		0.74545	0.70021	0.82905	1.0262	1.924	1.4185	2.0985	14.243		6.2324	24.223	3.6327	24.771	4.1987	24.226	11.018	54.209		1.9937	23.856	1.4361	2.0677
540.519	4.4316	0.15086	14.947	12.326	1.7951	1.6175	7.3458	54.79		2.052	25.516	5.0779	3.9209	1.6668	2.0672	2.1629	4.1344		13.86	14.072	2.7454	3.8614	2.5254	27.053	3.4131	4.8784		0.72982	0.70261	0.84944	1.0131	1.9383	1.4692	2.0616	14.122		6.0348	24.405	4.5295	25.133	4.25	25.164	10.8	48.705		1.9048	24.19	1.4189	2.0074
541.038	4.7358	0.14982	14.992	11.616	1.7255	1.6288	7.4195	53.109		2.1225	26.092	4.9171	3.8467	1.7786	2.1491	2.2138	4.1796		13.66	12.665	2.7057	3.8303	2.5482	29.996	3.3636	5.0147		0.71424	0.70598	0.88067	0.99957	1.9491	1.5279	2.0177	13.981		5.8196	24.708	5.4682	25.355	4.2868	26.097	10.581	43.705		1.8235	24.664	1.4044	1.9463
541.558	5.0529	0.1487	15.002	10.87	1.6516	1.6402	7.4809	51.16		2.1984	26.609	4.7592	3.7597	1.8868	2.2216	2.2737	4.2141		13.406	11.375	2.6566	3.7938	2.5612	32.913	3.3219	5.1497		0.69889	0.71021	0.9228	0.98573	1.9562	1.5931	1.968	13.82		5.5892	25.125	6.4407	25.434	4.3069	27.015	10.366	39.257		1.7514	25.284	1.3918	1.8857
542.077	5.378	0.1475	14.979	10.102	1.5745	1.6515	7.5311	48.97		2.2786	27.077	4.6087	3.6608	1.9896	2.284	2.3421	4.2383		13.107	10.211	2.5993	3.7524	2.5643	35.753	3.289	5.2822		0.68399	0.71522	0.9757	0.97158	1.9592	1.6632	1.914	13.641		5.3467	25.646	7.4391	25.373	4.3089	27.907	10.162	35.397		1.69	26.058	1.3804	1.8267
542.596	5.7061	0.14625	14.924	9.3253	1.4954	1.6627	7.5714	46.571		2.3621	27.509	4.47	3.5515	2.0854	2.3356	2.4182	4.2531		12.771	9.1781	2.5353	3.7066	2.5578	38.472	3.2654	5.411		0.66977	0.72094	1.039	0.95712	1.9579	1.7364	1.8569	13.447		5.0957	26.26	8.4558	25.175	4.2917	28.762	9.9713	32.146		1.6402	26.986	1.3695	1.7704
543.115	6.0325	0.14495	14.838	8.5534	1.4156	1.6735	7.6031	43.995		2.4475	27.921	4.347	3.4335	2.1724	2.376	2.5009	4.2595		12.405	8.2804	2.4659	3.6569	2.542	41.026	3.2516	5.535		0.65649	0.72733	1.1121	0.94239	1.9519	1.811	1.7979	13.24		4.8402	26.95	9.4836	24.849	4.2546	29.571	9.7988	29.509		1.6029	28.07	1.3586	1.7176
543.635	6.3525	0.14364	14.723	7.7986	1.3366	1.6837	7.6273	41.279		2.5337	28.329	4.2429	3.3091	2.2492	2.4053	2.5889	4.2591		12.019	7.5182	2.3925	3.6034	2.5175	43.377	3.2477	5.6531		0.64441	0.73432	1.1941	0.92743	1.9414	1.8853	1.7385	13.027		4.5847	27.697	10.515	24.402	4.1977	30.324	9.6471	27.482		1.5787	29.306	1.3469	1.6692
544.154	6.6619	0.14231	14.581	7.0719	1.2599	1.6932	7.6449	38.46		2.6192	28.751	4.1606	3.1807	2.3146	2.4235	2.6805	4.2533		11.624	6.8895	2.3164	3.5464	2.4851	45.49	3.2535	5.7643		0.63382	0.74188	1.2841	0.91231	1.9261	1.9576	1.6799	12.81		4.3334	28.482	11.542	23.848	4.1214	31.01	9.5182	26.047		1.5676	30.69	1.334	1.6258
544.673	6.9566	0.141	14.412	6.3833	1.1873	1.7019	7.6567	35.573		2.7028	29.206	4.1021	3.0509	2.3675	2.4311	2.774	4.244		11.23	6.3898	2.2388	3.4862	2.4456	47.334	3.2686	5.8677		0.625	0.74996	1.3808	0.89712	1.9061	2.0262	1.6233	12.597		4.0909	29.281	12.558	23.197	4.0268	31.62	9.4132	25.173		1.5698	32.212	1.3195	1.5879
545.192	7.2331	0.13971	14.219	5.741	1.1203	1.7095	7.6632	32.658		2.7832	29.713	4.0688	2.9226	2.4072	2.4286	2.8677	4.2333		10.846	6.0125	2.161	3.4228	2.4002	48.885	3.2922	5.9623		0.61826	0.75851	1.4827	0.88199	1.8817	2.0896	1.5697	12.392		3.8615	30.07	13.553	22.466	3.9151	32.147	9.3323	24.823		1.5848	33.86	1.303	1.5558
545.712	7.4882	0.13847	14.002	5.1518	1.0608	1.716	7.6648	29.749		2.8592	30.292	4.061	2.7985	2.4332	2.4167	2.9596	4.2234		10.483	5.7493	2.084	3.3565	2.35	50.123	3.3234	6.0474		0.61387	0.76745	1.5884	0.86707	1.8531	2.1462	1.5203	12.201		3.6491	30.825	14.518	21.666	3.7882	32.581	9.2746	24.948		1.6121	35.618	1.2845	1.5298
546.231	7.719	0.13729	13.764	4.6207	1.0103	1.7212	7.6616	26.881		2.9297	30.962	4.0788	2.6815	2.4456	2.3964	3.0478	4.2162		10.151	5.5903	2.0087	3.2874	2.2962	51.036	3.3609	6.1221		0.6121	0.77671	1.6961	0.85257	1.8206	2.1948	1.4759	12.029		3.4573	31.52	15.445	20.814	3.6483	32.916	9.2384	25.496		1.651	37.467	1.264	1.51
546.75	7.923	0.13618	13.507	4.1514	0.97045	1.7253	7.6534	24.086		2.9938	31.742	4.121	2.574	2.4445	2.3686	3.1304	4.2141		9.8564	5.5244	1.936	3.2158	2.2401	51.615	3.4035	6.186		0.61317	0.78622	1.8042	0.83873	1.7847	2.2343	1.4373	11.88		3.2894	32.133	16.324	19.922	3.4977	33.146	9.2212	26.407		1.7005	39.386	1.2416	1.4963
547.269	8.0981	0.13516	13.231	3.7455	0.9429	1.728	7.6401	21.394		3.0508	32.649	4.1859	2.4785	2.4306	2.3343	3.2057	4.2189		9.608	5.5398	1.8664	3.1421	2.1828	51.861	3.4496	6.2383		0.61729	0.79589	1.9109	0.82585	1.7459	2.2639	1.4053	11.756		3.1477	32.64	17.144	19.005	3.3391	33.267	9.2199	27.617		1.7595	41.348	1.2176	1.4884
547.788	8.2425	0.13425	12.939	3.4033	0.92905	1.7294	7.6212	18.83		3.1002	33.7	4.2714	2.397	2.405	2.2947	3.2721	4.2324		9.4115	5.6242	1.8005	3.0667	2.1257	51.778	3.4979	6.2787		0.6246	0.80562	2.0143	0.81425	1.7048	2.2828	1.3802	11.662		3.0344	33.021	17.897	18.074	3.1751	33.275	9.2307	29.062		1.8268	43.327	1.1925	1.4862
548.308	8.3549	0.13347	12.632	3.1237	0.93022	1.7295	7.5962	16.418		3.1416	34.913	4.3743	2.331	2.369	2.2507	3.3284	4.256		9.2714	5.7651	1.7388	2.9902	2.0698	51.377	3.5469	6.3069		0.63522	0.81535	2.1128	0.80428	1.6622	2.2909	1.3626	11.596		2.9505	33.26	18.572	17.142	3.0086	33.168	9.2495	30.675		1.9011	45.291	1.1668	1.489
548.827	8.4343	0.13281	12.313	2.9041	0.94757	1.7284	7.5647	14.176		3.175	36.3	4.4913	2.2818	2.3243	2.2033	3.3732	4.2909		9.191	5.95	1.6815	2.9134	2.0165	50.676	3.5953	6.3228		0.64916	0.82501	2.2047	0.79634	1.6188	2.2879	1.3526	11.559		2.8967	33.342	19.16	16.217	2.8423	32.947	9.272	32.394		1.9811	47.211	1.1411	1.4964
549.346	8.4797	0.13231	11.983	2.7407	0.98204	1.7261	7.526	12.12		3.2004	37.875	4.6186	2.25	2.2729	2.1535	3.4059	4.3377		9.1715	6.1669	1.6288	2.8369	1.9665	49.697	3.6417	6.3265		0.66642	0.83453	2.2883	0.79082	1.5754	2.2742	1.3504	11.549		2.8728	33.257	19.652	15.309	2.679	32.613	9.2937	34.155		2.0654	49.051	1.116	1.5077
549.865	8.4911	0.13197	11.643	2.6289	1.0344	1.7226	7.4796	10.26		3.2182	39.647	4.7522	2.2357	2.2171	2.102	3.426	4.3966		9.2125	6.4045	1.5807	2.7616	1.9211	48.465	3.6854	6.3181		0.68691	0.84388	2.3624	0.78815	1.5327	2.2503	1.3557	11.563		2.878	32.999	20.042	14.425	2.5213	32.17	9.3104	35.9		2.1525	50.78	1.0924	1.5222
550.385	8.4683	0.1318	11.297	2.5632	1.1051	1.7181	7.4248	8.6046		3.2289	41.625	4.888	2.2387	2.1594	2.0496	3.4334	4.4675		9.3121	6.652	1.5374	2.6885	1.8809	47.01	3.7254	6.2983		0.71046	0.85305	2.4256	0.78873	1.4917	2.217	1.3686	11.597		2.9109	32.567	20.322	13.571	2.3717	31.624	9.3181	37.575		2.2413	52.365	1.0709	1.539
550.904	8.412	0.13182	10.947	2.5373	1.1944	1.7127	7.3611	7.1563		3.2332	43.813	5.0217	2.2582	2.1024	1.9967	3.4283	4.5497		9.4666	6.8996	1.4987	2.6183	1.8468	45.366	3.7614	6.2676		0.73687	0.86204	2.4769	0.79297	1.4531	2.1756	1.3885	11.645		2.9693	31.964	20.488	12.752	2.2326	30.986	9.3131	39.134		2.3304	53.774	1.052	1.5572
551.423	8.3231	0.13202	10.595	2.5448	1.3024	1.7065	7.288	5.9153		3.2318	46.212	5.1494	2.2927	2.049	1.9438	3.4114	4.6422		9.6706	7.1386	1.4645	2.5521	1.8193	43.568	3.7931	6.2271		0.76584	0.87087	2.5154	0.80123	1.4177	2.1274	1.415	11.703		3.0508	31.197	20.537	11.971	2.1061	30.266	9.2923	40.536		2.4187	54.978	1.0366	1.5759
551.942	8.2031	0.13243	10.244	2.5788	1.4286	1.6995	7.205	4.8784		3.2257	48.817	5.2673	2.3406	2.0018	1.8913	3.3838	4.7437		9.9176	7.3611	1.4347	2.4905	1.7989	41.65	3.8206	6.1776		0.79702	0.87958	2.5407	0.81386	1.3862	2.0741	1.4474	11.763		3.1522	30.276	20.467	11.231	1.9942	29.477	9.2531	41.748		2.5051	55.953	1.025	1.5943
552.462	8.0539	0.13303	9.8973	2.6328	1.5726	1.692	7.1119	4.0391		3.2157	51.621	5.3719	2.3999	1.9638	1.8394	3.3468	4.8523		10.2	7.5606	1.4092	2.4344	1.7861	39.65	3.8444	6.1206		0.83	0.88821	2.5523	0.83117	1.3592	2.0174	1.4851	11.821		3.2703	29.216	20.28	10.532	1.8983	28.636	9.1936	42.746		2.5886	56.678	1.0176	1.6113
552.981	7.878	0.13384	9.5582	2.7	1.7333	1.6841	7.0086	3.3884		3.2026	54.609	5.4602	2.4682	1.9375	1.7882	3.3023	4.9664		10.508	7.7317	1.3877	2.3844	1.7809	37.603	3.8651	6.0574		0.86432	0.89682	2.5502	0.85338	1.3374	1.9592	1.5271	11.869		3.4012	28.033	19.977	9.8757	1.8199	27.76	9.1127	43.515		2.6685	57.136	1.0149	1.6262
553.5	7.6784	0.13485	9.2303	2.7743	1.9098	1.6758	6.8952	2.9152		3.1875	57.761	5.5299	2.543	1.9256	1.738	3.2523	5.084		10.833	7.87	1.3702	2.3411	1.7835	35.542	3.8838	5.9895		0.8995	0.90544	2.5348	0.8807	1.3211	1.9017	1.5726	11.903		3.5412	26.749	19.563	9.2608	1.76	26.869	9.0098	44.047		2.744	57.317	1.017	1.6381
554.019	7.4585	0.13606	8.9171	2.85	2.1005	1.6674	6.7722	2.6064		3.171	61.051	5.5788	2.6218	1.9302	1.6887	3.199	5.2034		11.166	7.9725	1.3565	2.305	1.7937	33.501	3.9015	5.9186		0.93501	0.91412	2.5063	0.91325	1.3107	1.8467	1.6205	11.919		3.6863	25.384	19.045	8.6864	1.7192	25.981	8.8851	44.343		2.8145	57.22	1.024	1.6463
554.538	7.2221	0.13745	8.622	2.9221	2.3039	1.6589	6.6401	2.4474		3.1537	64.446	5.6057	2.702	1.9533	1.6406	3.145	5.3226		11.495	8.0371	1.3463	2.2762	1.8113	31.509	3.9197	5.8461		0.97031	0.9229	2.4657	0.95107	1.3064	1.7962	1.6699	11.912		3.8323	23.962	18.429	8.1509	1.6978	25.117	8.7397	44.412		2.8795	56.845	1.0357	1.6503
555.058	6.9733	0.13902	8.3484	2.9864	2.5181	1.6505	6.5	2.4226		3.1363	67.906	5.6096	2.7812	1.9965	1.5937	3.0929	5.4404		11.812	8.063	1.3396	2.2549	1.8358	29.591	3.9396	5.7738		1.0049	0.93178	2.4139	0.99415	1.3082	1.7523	1.7196	11.881		3.9755	22.507	17.726	7.6521	1.6958	24.295	8.5749	44.269		2.9386	56.204	1.0522	1.6496
555.577	6.7165	0.14074	8.0993	3.0393	2.741	1.6422	6.3534	2.5159		3.1191	71.386	5.5903	2.8571	2.0608	1.5482	3.0453	5.5555		12.106	8.0503	1.3362	2.2411	1.8667	27.771	3.9629	5.703		1.0382	0.94077	2.3521	1.0424	1.3162	1.7166	1.7686	11.826		4.1118	21.046	16.945	7.1876	1.7129	23.533	8.393	43.934		2.9915	55.314	1.073	1.644
556.096	6.4561	0.1426	7.8772	3.0782	2.9704	1.6343	6.2018	2.7106		3.1023	74.835	5.5479	2.9279	2.1467	1.5043	3.0047	5.6673		12.37	8.0002	1.336	2.2344	1.9032	26.067	3.9908	5.6349		1.0698	0.94987	2.2818	1.0956	1.33	1.6908	1.8159	11.746		4.2379	19.602	16.1	6.7549	1.7483	22.847	8.1965	43.431		3.0378	54.196	1.0977	1.6332
556.615	6.1964	0.14456	7.6843	3.1014	3.2042	1.6267	6.0474	2.9902		3.0862	78.196	5.4831	2.9921	2.2545	1.4622	2.9738	5.7754		12.594	7.9147	1.3388	2.2344	1.9444	24.493	4.0248	5.5708		1.0993	0.95902	2.2045	1.1536	1.3493	1.6761	1.8604	11.646		4.3503	18.201	15.202	6.3513	1.801	22.249	7.9885	42.79		3.0772	52.88	1.126	1.6174
557.135	5.942	0.14661	7.5219	3.108	3.44	1.6195	5.8923	3.3384		3.0707	81.412	5.3968	3.0485	2.3836	1.4222	2.9546	5.88		12.773	7.7967	1.3444	2.2406	1.9894	23.059	4.0658	5.5115		1.1263	0.9682	2.1221	1.216	1.3736	1.6737	1.9012	11.528		4.4461	16.867	14.265	5.9742	1.8697	21.749	7.7724	42.039		3.1097	51.398	1.1573	1.5968
557.654	5.697	0.14871	7.391	3.0977	3.6755	1.6129	5.7392	3.7394		3.0558	84.421	5.2904	3.0964	2.5328	1.3846	2.9495	5.9816		12.9	7.6497	1.3528	2.2522	2.037	21.771	4.1147	5.4577		1.1504	0.97732	2.0363	1.2824	1.4024	1.6845	1.9375	11.398		4.5226	15.623	13.303	5.6211	1.9529	21.353	7.5516	41.206		3.1349	49.787	1.191	1.5719
558.173	5.4652	0.15083	7.2915	3.0711	3.9084	1.6068	5.5906	4.1783		3.0415	87.162	5.1653	3.1358	2.7007	1.3498	2.96	6.0813		12.97	7.4775	1.3637	2.2685	2.0861	20.629	4.1722	5.4098		1.1715	0.98632	1.9491	1.3524	1.4349	1.7091	1.9684	11.262		4.5779	14.492	12.331	5.2895	2.0487	21.064	7.33	40.322		3.1528	48.087	1.2265	1.5433
558.692	5.2502	0.15293	7.2231	3.0296	4.1364	1.6013	5.4491	4.641		3.0276	89.574	5.0232	3.1668	2.8849	1.3181	2.9877	6.1802		12.982	7.2846	1.3768	2.2885	2.1354	19.631	4.2382	5.3678		1.1893	0.9951	1.8622	1.4253	1.4703	1.7475	1.9933	11.125		4.6102	13.493	11.363	4.9775	2.1553	20.878	7.111	39.411		3.1631	46.337	1.2632	1.5117
559.212	5.055	0.15497	7.1843	2.9747	4.3574	1.5965	5.3176	5.1146		3.0139	91.603	4.8659	3.1901	3.0828	1.2897	3.0334	6.2798		12.932	7.0752	1.3921	2.3114	2.1838	18.77	4.3126	5.3319		1.2039	1.0036	1.7776	1.5006	1.5078	1.7999	2.0118	10.996		4.6183	12.645	10.413	4.6832	2.2705	20.791	6.8984	38.499		3.1658	44.577	1.3004	1.4782
559.731	4.8823	0.15692	7.1734	2.9086	4.5693	1.5922	5.1984	5.5876		3.0004	93.197	4.6953	3.2067	3.2911	1.265	3.0977	6.3816		12.822	6.8537	1.4092	2.3361	2.23	18.037	4.3949	5.3016		1.2151	1.0116	1.6972	1.5777	1.5465	1.8658	2.0235	10.881		4.6016	11.964	9.4954	4.4049	2.3922	20.793	6.6955	37.605		3.1608	42.847	1.3376	1.4438
560.25	4.7342	0.15875	7.1881	2.834	4.77	1.5886	5.0941	6.0496		2.9869	94.313	4.5135	3.2179	3.5062	1.2442	3.1806	6.4873		12.652	6.6244	1.428	2.3618	2.2728	17.419	4.4838	5.2764		1.223	1.0192	1.6225	1.6557	1.5854	1.9445	2.0284	10.787		4.56	11.461	8.6233	4.1414	2.518	20.871	6.5053	36.747		3.1482	41.181	1.3742	1.4096
560.769	4.6122	0.16042	7.2255	2.7534	4.9579	1.5856	5.0068	6.492		2.9734	94.916	4.3224	3.2252	3.7242	1.2274	3.2816	6.5981		12.425	6.3909	1.4481	2.3877	2.3112	16.901	4.5779	5.2558		1.2277	1.0261	1.5551	1.7341	1.6238	2.0352	2.0265	10.72		4.4938	11.148	7.8093	3.8916	2.6458	21.011	6.3307	35.937		3.128	39.612	1.4097	1.3769
561.288	4.5173	0.16191	7.2823	2.6698	5.1311	1.5831	4.9383	6.9076		2.9599	94.984	4.1243	3.2301	3.9408	1.2146	3.3997	6.7155		12.146	6.1567	1.4694	2.4129	2.3441	16.467	4.6756	5.2388		1.2293	1.0323	1.4964	1.8118	1.6605	2.1366	2.018	10.684		4.4041	11.032	7.0646	3.6549	2.7732	21.194	6.1741	35.183		3.1003	38.167	1.4438	1.347
561.808	4.4501	0.16318	7.3553	2.5859	5.2883	1.5812	4.8902	7.2907		2.9465	94.504	3.9212	3.2342	4.1517	1.2057	3.5334	6.8403		11.82	5.9246	1.4917	2.437	2.3706	16.101	4.7746	5.2246		1.2281	1.0376	1.4476	1.8882	1.695	2.2471	2.0034	10.682		4.292	11.116	6.3993	3.4308	2.8981	21.403	6.0373	34.492		3.0653	36.867	1.476	1.3211
562.327	4.4105	0.16422	7.4408	2.5048	5.4279	1.5799	4.8637	7.6375		2.9332	93.476	3.7153	3.239	4.3524	1.2007	3.6807	6.9731		11.453	5.697	1.5148	2.4593	2.39	15.786	4.8727	5.2122		1.2243	1.0421	1.4093	1.9624	1.7262	2.3652	1.9832	10.718		4.1596	11.401	5.8219	3.2188	3.0184	21.616	5.9219	33.865		3.0232	35.73	1.5063	1.3006
562.846	4.3978	0.16502	7.5352	2.4289	5.5491	1.5789	4.8594	7.9458		2.9202	91.913	3.5089	3.2457	4.5387	1.1992	3.8391	7.114		11.053	5.4755	1.5384	2.4796	2.4017	15.504	4.9674	5.2005		1.2181	1.0456	1.3824	2.0335	1.7537	2.489	1.9584	10.792		4.0089	11.883	5.3395	3.0187	3.1322	21.816	5.8289	33.3		2.9743	34.765	1.5343	1.2867
563.365	4.4112	0.16555	7.635	2.3608	5.6508	1.5784	4.8778	8.2148		2.9076	89.836	3.3041	3.2555	4.7066	1.2009	4.0058	7.2627		10.627	5.2613	1.5626	2.4976	2.4052	15.242	5.056	5.1887		1.2097	1.0479	1.367	2.1007	1.7767	2.6164	1.9297	10.902		3.8425	12.556	4.9573	2.8305	3.2375	21.984	5.7587	32.793		2.9189	33.976	1.5602	1.2805
563.885	4.449	0.16582	7.7369	2.3028	5.7327	1.5782	4.9188	8.4454		2.8956	87.282	3.1033	3.2693	4.8521	1.2052	4.1775	7.4186		10.185	5.055	1.5873	2.5134	2.4	14.984	5.1361	5.1756		1.1995	1.0491	1.3632	2.1631	1.7948	2.7452	1.8983	11.047		3.6632	13.41	4.6785	2.6541	3.3327	22.104	5.7113	32.338		2.8576	33.361	1.5838	1.2831
564.404	4.5093	0.16583	7.8379	2.2568	5.7944	1.5783	4.9818	8.6399		2.8842	84.293	2.9087	3.2874	4.9723	1.2117	4.3509	7.5803		9.7341	4.8569	1.6124	2.5268	2.3862	14.72	5.2052	5.1605		1.1878	1.0491	1.3708	2.22	1.8075	2.8732	1.8652	11.222		3.4738	14.431	4.5048	2.4895	3.4164	22.161	5.6862	31.927		2.7907	32.913	1.6054	1.2955
564.923	4.59	0.16557	7.9357	2.2244	5.8362	1.5785	5.066	8.8019		2.8736	80.922	2.7222	3.31	5.0643	1.2197	4.5224	7.7462		9.2844	4.6669	1.6381	2.5382	2.3636	14.439	5.261	5.1425		1.1748	1.0476	1.389	2.2706	1.8147	2.9982	1.8316	11.422		3.2774	15.603	4.4356	2.3367	3.4873	22.146	5.6824	31.551		2.7188	32.619	1.6249	1.3183
565.442	4.6884	0.16507	8.0282	2.2069	5.8585	1.5787	5.17	8.9359		2.8638	77.225	2.5459	3.3369	5.1263	1.2286	4.6883	7.9144		8.8444	4.4846	1.6645	2.5478	2.3324	14.134	5.3015	5.1209		1.1608	1.0448	1.4172	2.3142	1.816	3.1177	1.7986	11.642		3.077	16.905	4.4688	2.1956	3.5443	22.05	5.6984	31.202		2.6426	32.463	1.6427	1.3524
565.962	4.8018	0.16433	8.1142	2.2053	5.8623	1.5788	5.292	9.0474		2.8549	73.267	2.3816	3.3677	5.1571	1.2377	4.8448	8.0827		8.4224	4.3095	1.6918	2.5561	2.2927	13.801	5.3252	5.0951		1.1463	1.0404	1.4541	2.3502	1.8113	3.2298	1.7674	11.873		2.8754	18.316	4.6002	2.066	3.5865	21.871	5.7326	30.87		2.5627	32.424	1.659	1.3981
566.481	4.9273	0.16338	8.193	2.22	5.8489	1.5787	5.4298	9.1425		2.8468	69.111	2.231	3.4013	5.1563	1.2462	4.9885	8.2485		8.0262	4.1413	1.7201	2.5634	2.2451	13.437	5.3306	5.0645		1.1314	1.0345	1.4986	2.3782	1.8008	3.3321	1.7391	12.11		2.6754	19.811	4.8242	1.9479	3.6133	21.609	5.7826	30.547		2.4799	32.479	1.674	1.4557
567	5.0616	0.16222	8.2648	2.2514	5.8199	1.5783	5.5809	9.2278		2.8394	64.823	2.0955	3.4368	5.1245	1.2537	5.116	8.4094		7.6629	3.9795	1.7499	2.5702	2.1901	13.045	5.317	5.0288		1.1165	1.027	1.5491	2.398	1.7844	3.4227	1.7145	12.344		2.4795	21.363	5.1335	1.841	3.6242	21.269	5.8461	30.225		2.395	32.602	1.6881	1.5252
567.519	5.2019	0.16088	8.3304	2.2994	5.7773	1.5774	5.7424	9.3095		2.8325	60.468	1.9762	3.4728	5.0631	1.2595	5.224	8.563		7.339	3.8241	1.7812	2.5772	2.1281	12.626	5.2838	4.9877		1.1019	1.0179	1.6041	2.4092	1.7624	3.4997	1.6945	12.57		2.2899	22.945	5.5196	1.7448	3.619	20.86	5.9205	29.899		2.3089	32.77	1.7014	1.6066
568.038	5.345	0.15939	8.3911	2.3636	5.7235	1.5758	5.9109	9.3942		2.8259	56.107	1.8742	3.5079	4.9739	1.2631	5.31	8.7067		7.0596	3.6752	1.8145	2.5847	2.0601	12.186	5.2312	4.9411		1.088	1.0072	1.662	2.412	1.735	3.5616	1.6798	12.78		2.1087	24.528	5.9727	1.659	3.5976	20.393	6.0029	29.564		2.2225	32.954	1.7142	1.6995
568.558	5.488	0.15776	8.4491	2.4434	5.661	1.5734	6.0832	9.4876		2.8194	51.8	1.7901	3.5406	4.86	1.2643	5.3716	8.8385		6.829	3.5333	1.8499	2.5933	1.9867	11.734	5.1595	4.8889		1.0752	0.99485	1.7209	2.4066	1.7027	3.607	1.6708	12.968		1.9374	26.083	6.4824	1.583	3.5603	19.884	6.0905	29.218		2.1368	33.131	1.7268	1.8034
569.077	5.628	0.15602	8.5067	2.5378	5.5924	1.5702	6.2556	9.5947		2.8126	47.597	1.7242	3.5695	4.7244	1.2628	5.4071	8.9565		6.6501	3.3993	1.8877	2.6035	1.9089	11.278	5.0695	4.8312		1.0636	0.98105	1.7795	2.3932	1.6659	3.6348	1.668	13.132		1.7773	27.582	7.0372	1.5162	3.5074	19.352	6.1806	28.862		2.0529	33.277	1.7394	1.9177
569.596	5.7625	0.1542	8.5667	2.6459	5.5206	1.5659	6.4243	9.7198		2.8052	43.547	1.6767	3.5931	4.571	1.2584	5.4152	9.0591		6.5247	3.2747	1.9278	2.6157	1.8276	10.83	4.9624	4.7682		1.0538	0.96592	1.8359	2.3724	1.625	3.6442	1.6714	13.267		1.6294	28.998	7.6256	1.4578	3.4397	18.817	6.2705	28.498		1.9718	33.37	1.7521	2.0413
570.115	5.8889	0.15232	8.632	2.7664	5.4484	1.5605	6.5857	9.8656		2.7968	39.69	1.6475	3.6103	4.4037	1.2514	5.3956	9.1449		6.4532	3.1612	1.9704	2.6303	1.7439	10.4	4.8398	4.7002		1.0458	0.94964	1.8889	2.345	1.5808	3.6349	1.681	13.372		1.4943	30.306	8.2357	1.4072	3.3579	18.302	6.3575	28.13		1.8946	33.392	1.7653	2.1734
570.635	6.0051	0.1504	8.7053	2.8979	5.3783	1.5539	6.7363	10.034		2.7872	36.061	1.6361	3.62	4.2267	1.2419	5.3483	9.2129		6.4348	3.0609	2.0152	2.6474	1.6586	10.003	4.7034	4.6276		1.0401	0.93245	1.937	2.3117	1.5337	3.6068	1.6966	13.446		1.3723	31.483	8.8559	1.3635	3.2633	17.831	6.4396	27.763		1.8224	33.326	1.7788	2.3126
571.154	6.1089	0.14847	8.7893	3.039	5.313	1.5462	6.8725	10.225		2.7759	32.684	1.6419	3.6214	4.0442	1.2303	5.2744	9.2623		6.4671	2.9764	2.0619	2.6674	1.5729	9.6508	4.5553	4.551		1.0369	0.91467	1.9792	2.2736	1.4845	3.5601	1.7179	13.491		1.2633	32.508	9.4748	1.3258	3.1571	17.427	6.5147	27.406		1.7563	33.162	1.793	2.4576
571.673	6.1987	0.14655	8.8863	3.188	5.2545	1.5373	6.9911	10.437		2.7625	29.582	1.6639	3.6141	3.8601	1.2171	5.1756	9.2925		6.5468	2.9106	2.1103	2.6901	1.4878	9.356	4.3978	4.4709		1.0361	0.89662	2.0145	2.2317	1.4338	3.4955	1.7442	13.508		1.1673	33.365	10.082	1.2933	3.041	17.116	6.5813	27.065		1.6973	32.89	1.8077	2.607
572.192	6.2727	0.14466	8.9977	3.3434	5.205	1.5272	7.0895	10.668		2.7469	26.768	1.7011	3.5979	3.6782	1.2029	5.054	9.3029		6.6692	2.8666	2.1596	2.7156	1.4044	9.131	4.2333	4.388		1.0381	0.8787	2.0421	2.1871	1.3823	3.414	1.7749	13.501		1.0837	34.04	10.667	1.2653	2.9167	16.92	6.6386	26.75		1.6465	32.504	1.823	2.7592
572.712	6.3297	0.14283	9.1248	3.5035	5.1658	1.5162	7.165	10.913		2.7286	24.249	1.7522	3.5727	3.5017	1.1886	4.9129	9.293		6.8286	2.8477	2.2094	2.7436	1.3237	8.9871	4.0644	4.3029		1.0428	0.86131	2.0616	2.1411	1.3307	3.3169	1.8092	13.472		1.012	34.524	11.222	1.241	2.7862	16.862	6.6858	26.469		1.6047	32.005	1.8388	2.9126
573.231	6.3683	0.14107	9.2676	3.6666	5.1381	1.5043	7.2158	11.168		2.7075	22.028	1.8158	3.539	3.3337	1.1748	4.7558	9.2624		7.0183	2.8571	2.2587	2.7735	1.2466	8.9342	3.8938	4.2165		1.05	0.84487	2.0724	2.0947	1.2795	3.2059	1.8461	13.428		0.95164	34.811	11.738	1.22	2.6515	16.963	6.7232	26.23		1.5729	31.393	1.8553	3.0653
[truncated: 18,135 more rows]
[truncated: 4 more columns]
