# Supplementary material for: Strategies of elite Chinese gymnasts in coping with landing impact from backward somersault
Source: PeerJ. 2019 Oct 25;7:e7914. doi: 10.7717/peerj.7914 (PMC6816378; doi:10.7717/peerj.7914)
Supplement: Supplemental Information 2 [file peerj-07-7914-s002.xlsx]

## Sheet: Sheet1
	Measured angle (degree)								Measured vGRF (N)			Simulation angle (degree)								Simulation vGRF (N)			Simulation angular velocity (degree/s)								Simulation torque (Nm)
Time (ms)	L-hip	L-knee	L-ankle	R-hip	R-knee	R-ankle		Time (ms)			Time (ms)	L-hip	L-knee	L-ankle	R-hip	R-knee	R-ankle		Time (ms)			Time (ms)	Left_hip	Left_knee	Left_ankle	Right_hip	Right_knee	Right_ankle		Time (ms)	left_hip	left_knee	left_ankle	right_hip	right_knee	right_ankle
-100	101.122	172.164	97.939	107.859	172.313	109.677		0	133.792		-100	99.9	162.6	87.24	99.9	165.3	93.92		0	115.85		-100	272.549	174.808	99.9684	301.79	29.443	157.906		-100	-8.93402	54.1782	7.64755	58.4381	111.841	12.8526
-96	102.112	172.597	98.271	109.011	171.241	110.086		1	315.849		-98	100.3	163.1	87.29	100.2	166	93.98		2	167.02		-96	242.391	99.115	60.4644	282.69	-51.641	141.878		-96	-51.4486	43.3335	5.07275	33.6565	108.606	10.2642
-92	103.061	172.789	98.629	110.093	170.073	110.546		2	503.57		-96	100.6	163.6	87.33	100.5	166.6	94.05		4	218.191		-92	229.698	57.067	70.5695	262.193	-101.128	153.125		-92	-95.666	28.913	1.99943	6.4685	101.287	6.91048
-88	103.95	172.806	99.008	111.101	168.939	110.986		3	686.361		-94	101	164.1	87.35	100.7	167.2	94.11		6	313.98		-88	217.959	31.162	107.143	242.202	-109.297	185.815		-88	-140.5	11.2623	-1.41675	-22.4165	90.1636	2.98438
-84	104.805	172.714	99.414	112.035	167.915	111.402		4	854.493		-92	101.3	164.4	87.37	100.9	167.7	94.18		8	410.913		-84	209.26	16.549	123.739	218.239	-102.347	166.156		-84	-184.802	-9.09211	-4.99494	-52.1669	75.7314	-1.28325
-80	105.624	172.564	99.822	112.889	167.042	111.791		5	1000.09		-90	101.6	164.8	87.39	101.1	168.1	94.24		10	590.218		-80	201.138	4.048	141.661	200.243	-91.356	110.985		-80	-227.392	-31.4631	-8.53907	-81.8453	58.6769	-5.63746
-76	106.414	172.415	100.236	113.664	166.349	112.165		6	1118		-88	101.8	165	87.41	101.3	168.5	94.3		12	773.857		-76	199.302	7.164	71.4278	186.582	-63.19	115.278		-76	-267.086	-55.0308	-11.849	-110.433	39.8467	-9.8145
-72	107.218	172.27	100.711	114.362	165.843	112.521		7	1206.46		-86	102.1	165.3	87.44	101.4	168.9	94.36		14	1109.43		-72	196.637	19.885	95.7565	148.867	-20.767	124.95		-72	-302.733	-78.8769	-14.7321	-136.863	20.206	-13.5577
-68	107.987	172.136	101.185	114.994	165.521	112.868		8	1267.48		-84	102.3	165.5	87.46	101.6	169.2	94.42		16	1457.33		-68	180.882	22.821	161.562	138.049	-32.722	114.34		-68	-333.25	-102.024	-17.0148	-160.053	0.79218	-16.6332
-64	108.665	172.021	101.673	115.573	165.368	113.204		9	1306.9		-82	102.5	165.7	87.46	101.7	169.4	94.49		18	2085.27		-64	182.404	66.047	140.686	146.176	-43.335	118.356		-64	-357.654	-123.479	-18.5531	-178.952	-17.3355	-18.8439
-60	109.446	171.922	102.123	116.113	165.346	113.704		10	1334.16		-80	102.7	165.8	87.46	101.8	169.7	94.56		20	2744.33		-60	219.102	15.672	115.568	132.969	-7.085	143.274		-60	-375.107	-142.274	-19.2415	-192.584	-33.1481	-20.0419
-56	110.418	171.812	102.622	116.639	165.382	114.937		11	1361.62		-78	102.9	165.9	87.46	101.9	169.9	94.62		22	3286.43		-56	240.161	-52.251	105.733	127.997	13.678	149.576		-56	-384.941	-157.513	-19.0203	-200.092	-45.6968	-20.1376
-52	111.368	171.75	103.693	117.182	165.458	116.233		12	1403.74		-76	103.1	166	87.48	102	170.08	94.67		24	3811.82		-52	238.998	6.754	109.828	120.412	39.448	135.905		-52	-386.69	-168.41	-17.8796	-200.786	-54.1606	-19.1056
-48	112.33	171.634	104.949	117.771	165.57	117.102		13	1475.85		-74	103.3	166.1	87.52	102.1	170.24	94.72		26	4476.21		-48	245.541	30.048	123.258	123.87	37.279	122.235		-48	-380.121	-174.327	-15.8611	-194.181	-57.8866	-16.9868
-44	113.332	171.452	105.934	118.409	165.71	117.541		14	1592.92		-72	103.4	166.2	87.58	102.2	170.37	94.78		28	5165.12		-44	247.403	18.68	113.716	135.279	29.352	105.594		-44	-365.244	-174.805	-13.057	-180.034	-56.4241	-13.8862
-40	114.309	171.208	106.547	119.088	165.875	117.425		15	1768.18		-70	103.6	166.2	87.64	102.3	170.48	94.85		30	5855.28		-40	253.419	13.788	109.476	145.248	35.048	95.7451		-40	-342.33	-169.584	-9.60472	-158.369	-49.5482	-9.9674
-36	115.359	170.916	106.687	119.89	165.968	116.729		16	2011.84		-68	103.8	166.3	87.72	102.4	170.56	94.93		32	6545.71		-36	262.631	-0.121	119.151	165.977	29.227	67.7848		-36	-311.912	-158.627	-5.68075	-129.494	-37.274	-5.44315
-32	116.41	170.556	106.271	120.877	166.012	115.38		17	2329.98		-66	104	166.3	87.81	102.5	170.61	95.01		34	6953.99		-32	270.255	-48.159	115.05	191.662	26.515	58.1689		-32	-274.779	-142.119	-1.4904	-94.0064	-19.8597	-0.56299
-28	117.521	170.208	105.257	122.03	166.152	113.377		18	2723.67		-64	104.2	166.4	87.91	102.7	170.64	95.1		36	7291.74		-28	283.216	-45.239	64.9857	225.03	25.322	71.1818		-28	-231.955	-120.47	2.74341	-52.7831	2.20085	4.40136
-24	118.676	169.947	103.691	123.266	166.519	110.855		19	3188.45		-62	104.4	166.4	88.01	102.8	170.65	95.19		38	7219.36		-24	298.355	3.753	56.8814	254.625	35.32	86.5402		-24	-184.679	-94.3051	6.79292	-6.96249	28.1962	9.17212
-20	119.908	169.909	101.638	124.412	167.281	108.055		20	3714.22		-60	104.6	166.4	88.12	102.9	170.63	95.28		40	7027.91		-20	319.66	8.024	98.844	278.305	35.301	79.9451		-20	-134.368	-64.443	10.4388	42.0904	57.2245	13.4821
-16	121.233	170.19	99.138	125.337	168.397	104.925		21	4285.55		-58	104.8	166.5	88.24	103	170.58	95.37		42	6560.99		-16	338.228	15.804	70.9686	308.607	-5.957	-570.316		-16	-82.5723	-31.8712	13.4832	92.8281	88.2292	17.0909
-12	122.614	170.787	96.239	125.981	169.599	101.487		22	4882.37		-56	105	166.5	88.38	103.1	170.5	95.47		44	6002.24		-12	349.117	43.938	-264.514	319.045	-68.357	-2037.7		-12	-30.9246	2.28775	15.7619	143.575	120.04	19.7996
-8	124.026	171.607	92.956	126.312	170.468	97.774		23	5481.07		-54	105.3	166.5	88.53	103.3	170.39	95.58		46	5369.4		-8	372.638	-36.922	-1723.35	279.269	-86.226	-2704.52		-8	18.9131	36.8152	17.1546	192.591	151.421	21.4637
-4	125.595	172.29	89.415	126.328	170.422	93.873		24	6055.88		-52	105.5	166.5	88.71	103.4	170.27	95.7		48	4708.47		-4	358.31	-89.499	-3186.11	196.229	-164.702	-2865.92		-4	65.3094	70.4392	17.5931	238.138	181.116	22.0019
0	126.893	172.313	85.782	126.038	169.091	89.796		25	6580.48		-50	105.8	166.5	88.89	103.5	170.11	95.83		50	4104.23		0	276.591	-117.142	-3222.44	144.639	-362.81	-2232.86		0	106.723	101.88	17.0665	278.549	207.902	21.4027
4	127.808	171.152	82.161	125.467	166.635	85.741		26	7029.65		-48	106.1	166.6	89.076	103.7	169.9	95.97		52	3524.28		4	179.295	-275.347	-2193.74	143.52	-643.086	-381.698		4	141.758	129.895	15.6233	312.297	230.632	19.7261
8	128.327	168.769	78.638	124.637	163.43	81.886		27	7380.97		-46	106.4	166.6	89.247	103.8	169.8	96.11		54	3041.16		8	95.54	-514.428	-601.068	-132.918	-1118.57	176.33		8	169.222	153.327	13.3702	338.063	248.28	17.1013
12	128.572	165.49	75.326	123.553	159.772	78.425		28	7616.29		-44	106.8	166.6	89.405	104	169.6	96.25		56	2604.66		12	-128.419	-834.005	-175.132	-741.01	-1673.72	-642.862		12	188.167	171.144	10.4672	354.786	259.982	13.7205
16	127.3	161.669	72.323	122.205	155.823	75.497		29	7722.97		-42	107.1	166.6	89.551	104.1	169.4	96.4		58	2249.51		16	-664.775	-1312.4	-871.378	-1149.3	-1821.67	-835.262		16	197.933	182.477	7.12039	361.717	265.065	9.82927
20	123.254	157.545	69.733	120.592	151.7	73.187		30	7694.79		-40	107.5	166.6	89.686	104.3	169.1	96.55		60	1938.17		20	-1043.65	-1627.28	-536.861	-1128.81	-1529.11	-124.673		20	198.17	186.656	3.57092	358.448	263.067	5.71287
24	118.951	153.299	67.668	118.741	147.544	71.561		31	7532.36		-38	107.8	166.6	89.809	104.5	168.9	96.69		62	1684.69		24	-980.71	-1495.92	512.778	-809.783	-1043.62	570.361		24	188.857	183.236	0.08253	344.934	253.761	1.68115
28	115.408	149.078	66.163	116.708	143.509	70.679		32	7243.18		-36	108.2	166.6	89.9198	104.7	168.7	96.83		64	1465.93		28	-734.731	-1176.72	963.428	-454.017	-532.924	832.499		28	170.306	172.01	-3.07276	321.497	237.153	-1.94889
32	113.073	145.033	65.281	114.567	139.747	70.605		33	6841.1		-34	108.6	166.6	90.0147	105	168.5	96.96		66	1289.21		32	-505.758	-836.855	774.727	-227.693	-228.44	620.915		32	143.145	153.026	-5.62969	288.818	213.481	-4.87091
36	111.362	141.275	65.107	112.405	136.412	71.405		34	6345.53		-32	108.9	166.5	90.0896	105.2	168.3	97.08		68	1140.51		36	-398.95	-589.884	504.168	-112.947	-91.93	373.904		36	108.301	126.584	-7.34473	247.904	183.208	-6.80679
40	109.881	137.933	65.714	110.311	133.582	72.937		35	5780.11		-30	109.3	166.5	90.14	105.5	168.1	97.18		70	1023.29		40	-338.876	-407.802	362.708	-113.684	-57.01	218.041		40	66.9594	93.2296	-8.0102	200.053	146.999	-7.52278
44	108.651	135.088	67.068	108.359	131.235	74.103		36	5171.25		-28	109.8	166.4	90.161	105.8	167.9	97.24		72	929.346		44	-310.203	-235.842	194.448	-165.515	-101.223	128.113		44	20.5195	53.7365	-7.46665	146.797	105.697	-6.84348
48	107.4	132.788	68.176	106.611	129.438	74.901		37	4546.43		-26	110.2	166.4	90.144	106.1	167.8	97.26		74	860.091		48	-309.5	-89.107	-8.15868	-253.55	-239.186	160.125		48	-29.4616	9.08301	-5.61294	89.8412	60.2932	-4.66277
52	106.175	131.053	68.807	105.122	128.233	75.561		38	3932.49		-24	110.6	166.3	90.0778	106.5	167.6	97.22		76	811.04		52	-334.238	-48.073	-131.921	-370.667	-419.152	170.49		52	-81.331	-39.5802	-2.41326	30.9922	11.8903	-0.9511
56	104.726	129.933	69.125	103.968	127.595	75.957		39	3354.07		-22	111.1	166.3	89.9546	106.9	167.4	97.09		78	781.806		56	-323.16	-88.99	-129.707	-446.35	-501.338	94.5234		56	-133.406	-90.9681	2.09909	-27.9153	-38.3336	4.24126
60	103.59	129.396	69.097	103.227	127.423	76.166		40	2832.09		-20	111.6	166.2	89.774	107.2	167.2	96.85		80	770.502		60	-255.053	-145.465	-153.075	-430.117	-424.499	-49.0294		60	-184.04	-143.704	7.82173	-85.0927	-89.1644	10.7853
64	102.685	129.284	68.797	102.763	127.398	76.235		41	2382.74		-18	112.1	166.1	89.53	107.7	167	96.44		82	773.46		64	-194.102	-184.611	-203.299	-324.354	-266.366	-131.145		64	-231.687	-196.367	14.5868	-138.868	-139.39	18.4786
68	102.037	129.363	68.258	102.4	127.25	76.214		42	2016.62		-16	112.6	166.1	89.202	108.1	166.7	95.8		84	790.68		68	-146.981	-174.415	-203.485	-188.486	-140.713	-128.963		68	-274.961	-247.536	22.1679	-187.751	-187.837	27.0543
72	101.51	129.396	67.681	102.079	126.975	76.106		43	1738.52		-14	113.1	166	88.75	108.5	166.3	94.84		86	814.357		72	-91.519	-122.549	-150.634	-80.781	-68.732	-103.755		72	-312.688	-295.843	30.2908	-230.487	-233.404	36.1942
76	101.305	129.332	67.06	101.778	126.614	75.891		44	1547.39		-12	113.7	165.8	88.12	108.9	165.8	93.45		88	845.172		76	-75.055	-105.235	-176.588	-19.452	-37.517	-54.6741		76	-343.948	-340.013	38.646	-266.1	-275.095	45.5437
80	100.909	129.199	66.341	101.526	126.247	75.506		45	1436.91		-10	114.2	165.7	87.25	109.3	165.2	91.5		90	874.667		80	-20.534	-69.429	-253.181	5.189	-38.907	-14.8592		80	-368.105	-378.912	46.9037	-293.923	-312.042	54.7298
84	101.141	129.033	65.542	101.356	125.949	74.998		46	1396.3		-8	114.7	165.4	86.02	109.7	164.4	88.93		92	902.548		84	59.578	-16.789	-287.018	23.8	-50.304	2.33364		84	-384.821	-411.581	54.73	-313.611	-343.525	63.3791
88	101.386	128.841	64.75	101.298	125.773	74.36		47	1411.42		-6	115.3	165.1	84.28	110.1	163.4	85.91		94	926.144		88	116.631	25.262	-337.366	67.879	-37.031	-20.9761		88	-394.063	-437.267	61.8034	-325.143	-368.99	71.1363
92	102.074	128.636	64.078	101.355	125.755	73.636		48	1466.06		-4	115.8	164.6	81.95	110.4	162.3	82.73		96	943.941		92	184.51	92.227	-349.93	124.354	11.832	-80.8372		92	-396.094	-455.446	67.8306	-328.804	-388.056	77.6821
96	102.862	128.441	63.605	101.504	125.906	72.84		49	1543.33		-2	116.3	164	79.1	110.7	161	79.6		98	957.836		96	190.64	113.55	-255.808	165.546	71.338	-127.43		96	-391.443	-465.843	72.5608	-325.157	-400.52	82.7483
100	103.599	128.28	63.315	101.723	126.227	72.172		50	1626.91		0	116.7	163.2	76	110.9	159.7	76.7		100	965.875		100	132.267	29.739	-49.6607	174.687	121.815	-131.771		100	-380.878	-468.429	75.7986	-315.004	-406.356	86.1313
104	103.92	128.18	63.199	101.975	126.661	71.668		51	1702.32		2	117	162.4	72.8	111.1	158.1	74		102	968.715		104	8.58	-127.167	142.572	125.46	138.14	-159.132		104	-365.354	-463.426	77.4135	-299.335	-405.706	87.7012
108	103.668	128.127	63.278	102.209	127.129	71.367		52	1757.81		4	117.2	161.4	69.7	111.1	156.4	71.6		104	962.888		108	-90.511	-177.214	125.916	40.132	109.196	-208.143		108	-345.967	-451.288	77.3456	-279.27	-398.871	87.4078
112	103.196	128.113	63.533	102.376	127.569	71.238		53	1785.11		6	117.3	160.2	66.7	110.9	154.4	69.5		106	952.299		112	-108.015	-106.096	28.5034	-31.631	66.324	-203.897		112	-323.895	-432.684	75.6092	-256.004	-386.297	85.2823
116	102.804	128.104	63.949	102.451	127.972	71.251		54	1779.73		8	117.2	158.8	64	110.5	152.1	67.7		108	932.867		116	-90.173	-22.215	27.8645	-68.394	48.509	-180.339		116	-300.334	-408.468	72.2911	-230.742	-368.551	81.4346
120	102.474	128.082	64.492	102.435	128.358	71.383		55	1741.03		10	116.9	157.1	61.6	109.9	149.5	66.1		110	913.126		120	-72.022	29.817	97.7879	-77.148	64.769	-153.281		120	-276.451	-379.643	67.5461	-204.646	-346.308	76.047
124	102.227	128.046	65.106	102.339	128.735	71.617		56	1671.86		12	116.4	155.2	59.4	109	146.7	64.8		112	892.746		124	-60.992	48.949	161.614	-85.405	83.731	-103.662		124	-253.318	-347.319	61.589	-178.779	-320.322	69.3643
128	101.986	128.005	65.767	102.169	129.101	71.947		57	1578.09		14	115.6	153	57.5	107.9	143.7	63.6		114	873.311		128	-65.868	47.106	182.054	-101.653	95.599	-58.1503		128	-231.872	-312.672	54.6831	-154.066	-291.407	61.6805
132	101.7	127.947	66.454	101.929	129.45	72.358		58	1467.73		16	114.6	150.6	55.9	106.7	140.7	62.6		116	856.081		132	-75.987	41.999	139.317	-120.557	89.067	11.9018		132	-212.875	-276.895	47.1272	-131.256	-260.408	53.3237
136	101.379	127.903	67.125	101.623	129.769	72.838		59	1350.1		18	113.4	148	54.8	105.5	137.8	61.9		118	836.42		136	-91.309	31.836	83.7974	-120.764	77.198	103.895		136	-196.88	-241.152	39.2403	-110.905	-228.18	44.6398
140	100.97	127.878	67.741	101.256	130.046	73.369		60	1234.8		20	112.1	145.3	54.1	104.2	135	61.4		120	810.346		140	-115.658	15.803	61.9802	-93.011	86.634	146.016		140	-184.222	-206.537	31.346	-93.3592	-195.563	35.975
144	100.453	127.909	68.277	100.851	130.287	73.928		61	1130.82		22	110.6	142.6	53.8	102.9	132.6	61.2		122	783.068		144	-140.78	-4.766	60.9427	-63.739	92.221	155.162		144	-175.005	-174.031	23.7563	-78.7636	-163.36	27.6593
148	99.844	128.016	68.739	100.438	130.51	74.506		62	1045.74		24	109.1	139.9	53.8	101.7	130.5	61.2		124	752.179		148	-149.961	-17.837	87.2412	-54.104	82.429	150.953		148	-169.116	-144.468	16.7569	-67.0705	-132.321	19.991
152	99.254	128.209	69.142	100.049	130.733	75.076		63	985.048		26	107.6	137.5	54.1	100.6	128.6	61.5		126	725.698		152	-130.515	-8.357	103.173	-57.783	72.107	147.627		152	-166.237	-118.508	10.5941	-58.0646	-103.117	13.2238
156	98.8	128.457	69.468	99.705	130.979	75.622		64	951.771		28	106.1	135.2	54.4	99.5	127	61.9		128	714.399		156	-100.44	13.375	118.958	-66.519	60.79	122.979		156	-165.878	-96.617	5.46344	-51.3938	-76.3333	7.55593
160	98.45	128.724	69.706	99.408	131.253	76.142		65	946.301		30	104.6	133.1	54.9	98.5	125.6	62.3		130	702.688		160	-65.764	36.687	106.097	-68.685	55.603	90.3416		160	-167.413	-79.0537	1.50189	-46.6067	-52.4516	3.12288
164	98.273	129.001	69.863	99.151	131.552	76.619		66	966.481		32	103.3	131.3	55.5	97.5	124.4	62.8		132	689.33		164	-24.877	61.586	66.658	-66.989	55.018	90.311		164	-170.12	-65.8711	-1.21714	-43.1933	-31.8443	-0.00622
168	98.251	129.302	69.954	98.93	131.864	77.047		67	1007.93		34	102	129.6	56	96.6	123.4	63.4		134	676.738		168	10.8	88.61	37.3278	-63.867	54.841	90.8699		168	-173.232	-56.9212	-2.68509	-40.6266	-14.7681	-1.82879
172	98.36	129.642	69.978	98.747	132.188	77.423		68	1064.54		36	100.8	128.1	56.6	95.8	122.6	64		136	667.755		172	41.344	116.039	19.4407	-54.233	62.1	91.0616		172	-175.981	-51.8717	-2.95629	-38.403	-1.36215	-2.40545
176	98.582	130.031	69.954	98.605	132.524	77.736		69	1129.15		38	99.7	126.8	57.3	95	121.9	64.7		138	659.536		176	66.85	137.832	12.4941	-40.298	67.827	85.2594		176	-177.645	-50.2297	-2.14258	-36.0779	8.34992	-1.8534
								70	1194.2		40	98.6	125.7	57.9	94.2	121.3	65.5		140	655.639
								71	1252.51		42	97.7	124.7	58.5	93.5	120.7	66.3		142	651.573
								72	1297.89		44	96.8	123.9	59.2	92.8	120.3	67.2		144	646.313
								73	1325.69		46	96	123.2	59.7	92.1	119.9	68.1		146	641.119
								74	1333.16		48	95.3	122.7	60.3	91.4	119.5	69.1		148	636.512
								75	1319.63		50	94.7	122.2	60.8	90.8	119.1	70.1		150	631.829
								76	1286.47		52	94.1	121.8	61.2	90.2	118.7	71.1		152	626.219
								77	1236.9		54	93.6	121.6	61.6	89.5	118.2	71.9		154	620.413
								78	1175.61		56	93.1	121.3	61.9	88.9	117.8	72.7		156	610.867
								79	1108.26		58	92.7	121.1	62.1	88.3	117.3	73.3		158	601.054
								80	1040.9		60	92.4	120.9	62.2	87.7	116.8	73.7		160	580.822
								81	979.432		62	92.1	120.7	62.2	87.2	116.3	74		162	560.59
								82	929.004		64	91.8	120.6	62.1	86.7	115.9	74.2
								83	893.602		66	91.5	120.4	62	86.3	115.5	74.2
								84	875.707		68	91.3	120.2	61.7	85.9	115.1	74.2
								85	876.121		70	91.1	120	61.4	85.5	114.8	74.2
								86	893.956		72	90.9	119.9	61.1	85.2	114.5	74
								87	926.787		74	90.8	119.8	60.7	85	114.2	73.9
								88	970.937		76	90.7	119.6	60.3	84.8	114	73.7
								89	1021.88		78	90.6	119.5	59.8	84.6	113.7	73.5
								90	1074.7		80	90.6	119.4	59.3	84.5	113.5	73.2
								91	1124.56		82	90.5	119.3	58.7	84.4	113.3	73
								92	1167.22		84	90.5	119.3	58.2	84.3	113.2	72.7
								93	1199.33		86	90.5	119.2	57.6	84.3	113	72.4
								94	1218.81		88	90.6	119.1	56.9	84.3	112.9	72.2
								95	1224.96		90	90.6	119	56.3	84.3	112.7	71.9
								96	1218.48		92	90.7	119	55.6	84.4	112.6	71.6
								97	1201.39		94	90.8	118.9	55	84.4	112.5	71.3
								98	1176.73		96	90.9	118.8	54.3	84.5	112.5	70.9
								99	1148.3		98	90.9	118.7	53.7	84.7	112.4	70.6
								100	1120.21		100	91	118.6	53.2	84.8	112.4	70.3
								101	1096.49		102	91	118.5	52.8	84.9	112.5	69.9
								102	1080.67		104	90.9	118.3	52.4	85.1	112.5	69.5
								103	1075.48		106	90.8	118.2	52.1	85.2	112.6	69.2
								104	1082.54		108	90.7	118	52	85.4	112.7	68.8
								105	1102.27		110	90.6	117.8	51.9	85.5	112.9	68.5
								106	1133.83		112	90.4	117.6	52	85.7	113	68.1
								107	1175.23		114	90.3	117.5	52.1	85.8	113.2	67.8
								108	1223.55		116	90.1	117.3	52.2	85.9	113.4	67.5
								109	1275.19		118	89.9	117.3	52.5	85.9	113.6	67.1
								110	1326.26		120	89.7	117.2	52.7	86	113.8	66.8
								111	1372.94		122	89.5	117.2	53	86	114	66.5
								112	1411.8		124	89.2	117.2	53.4	86.1	114.2	66.2
								113	1440.19		126	89	117.2	53.7	86.1	114.4	66
								114	1456.36		128	88.8	117.3	54.1	86.1	114.7	65.8
								115	1459.71		130	88.6	117.3	54.5	86.1	114.9	65.6
								116	1450.73		132	88.4	117.4	54.9	86	115.1	65.5
								117	1431		134	88.2	117.5	55.3	86	115.4	65.4
								118	1402.93		136	88	117.6	55.7	85.9	115.6	65.5
								119	1369.58		138	87.8	117.7	56.1	85.8	115.8	65.6
								120	1334.31		140	87.6	117.8	56.5	85.7	116	65.7
								121	1300.48		142	87.5	117.9	56.8	85.6	116.2	65.9
								122	1271.1		144	87.3	118	57.1	85.5	116.4	66.1
								123	1248.55		146	87.2	118.2	57.4	85.4	116.5	66.3
								124	1234.42		148	87	118.3	57.7	85.3	116.7	66.5
								125	1229.3		150	86.9	118.5	58	85.2	116.8	66.6
								126	1232.81		152	86.8	118.6	58.2	85.1	117	66.8
								127	1243.64		154	86.7	118.8	58.5	85	117.1	67
								128	1259.7		156	86.6	118.9	58.7	84.9	117.2	67.1
								129	1278.35		158	86.6	119.1	58.9	84.8	117.3	67.2
								130	1296.66		160	86.5	119.2	59.1	84.8	117.4	67.4
								131	1311.71		162	86.5	119.4	59.2	84.7	117.5	67.5
								132	1320.9		164	86.5	119.6	59.4	84.6	117.6	67.6
								133	1322.17		166	86.5	119.8	59.5	84.6	117.7	67.7
								134	1314.18		168	86.5	119.9	59.6	84.5	117.8	67.9
								135	1296.5		170	86.5	120.1	59.6	84.5	118	68
								136	1269.56		172	86.6	120.3	59.7	84.5	118.1	68.1
								137	1234.65		174	86.7	120.5	59.7	84.5	118.2	68.3
								138	1193.75		176	86.8	120.9	59.7	84.5	118.5	68.5
								139	1149.36
								140	1104.24
								141	1061.11
								142	1022.46
								143	990.264
								144	965.809
								145	949.606
								146	941.347
								147	939.952
								148	943.697
								149	950.391
								150	957.605
								151	962.914
								152	964.137
								153	959.547
								154	948.036
								155	929.216
								156	903.445
								157	871.786
								158	835.895
								159	797.848
								160	759.938
								161	724.449
								162	693.434
								163	668.519
								164	650.753
								165	648.193
								166	645.633
								167	643.073
								168	640.513
								169	639.755
								170	638.997
								171	638.238
								172	637.48
								173	632.462
								174	627.445
								175	622.427
								176	617.41
